# Supplementary material for: CSNK1A1, KDM2A, and LTB4R2 Are New Druggable Vulnerabilities in Lung Cancer
Source: Cancers (Basel). 2021 Jul 12;13(14):3477. doi: 10.3390/cancers13143477 (PMC8305418; doi:10.3390/cancers13143477)
Supplement: Supplementary file 1 [file cancers-13-03477-s001.zip]

Archive with 6 entries (6 files):
- Supplementary files/Supplementary Figure1.pdf
- Supplementary files/Supplementary Movie.mp4
- Supplementary files/Supplementary Table 1.xlsx
- Supplementary files/Supplementary Table 2.xlsx
- Supplementary files/Supplementary Table 3.xls
- Supplementary files/Supplementary Table 4.xlsx
