# Supplementary material for: CSNK1A1, KDM2A, and LTB4R2 Are New Druggable Vulnerabilities in Lung Cancer
Source: Cancers (Basel). 2021 Jul 12;13(14):3477. doi: 10.3390/cancers13143477 (PMC8305418; doi:10.3390/cancers13143477)
Supplement: Supplementary file 1 [file cancers-13-03477-s001.zip › Supplementary files/Supplementary Table 1.xlsx]

## Sheet: Lung adenocarcinoma
GOID	GOTerm	Ontology Source	Term PValue	Term PValue Corrected with Benjamini-Hochberg	Group PValue	Group PValue Corrected with Benjamini-Hochberg	GOLevels	GOGroups	% Associated Genes	Nr. Genes	Associated Genes Found
R-HSA:8868773	rRNA processing in the nucleus and cytosol	REACTOME_Pathways_27.02.2019	1.10817e-66	1.48717e-64	3.78067e-181	1.41775e-179	[-1]	Group34	58.8832	116	[BMS1, BOP1, BUD23, BYSL, C1D, DDX21, DDX47, DDX49, DHX37, DIMT1, DIS3, EBNA1BP2, EXOSC1, EXOSC10, EXOSC2, EXOSC3, EXOSC4, EXOSC5, EXOSC6, EXOSC7, EXOSC8, FTSJ3, GAR1, GNL3, HEATR1, IMP4, ISG20L2, KRR1, LTV1, MPHOSPH10, MTREX, NAT10, NCL, NHP2, NIP7, NOB1, NOL12, NOL6, NOL9, NOP10, NOP14, NOP2, NOP56, NOP58, PDCD11, RBM28, RCL1, RIOK2, RPL10A, RPL12, RPL13, RPL13A, RPL14, RPL15, RPL18A, RPL19, RP…
R-HSA:72312	rRNA processing	REACTOME_Pathways_27.02.2019	4.62452e-69	7.75763e-67	3.78067e-181	1.41775e-179	[-1]	Group34	58.4541	121	[BMS1, BOP1, BUD23, BYSL, C1D, DDX21, DDX47, DDX49, DHX37, DIMT1, DIS3, EBNA1BP2, ELAC2, EXOSC1, EXOSC10, EXOSC2, EXOSC3, EXOSC4, EXOSC5, EXOSC6, EXOSC7, EXOSC8, FTSJ3, GAR1, GNL3, HEATR1, IMP4, ISG20L2, KIAA0391, KRR1, LTV1, MPHOSPH10, MRM2, MTREX, NAT10, NCL, NHP2, NIP7, NOB1, NOL12, NOL6, NOL9, NOP10, NOP14, NOP2, NOP56, NOP58, NSUN4, PDCD11, RBM28, RCL1, RIOK2, RPL10A, RPL12, RPL13, RPL13A, R…
R-HSA:72203	Processing of Capped Intron-Containing Pre-mRNA	REACTOME_Pathways_27.02.2019	2.08533e-77	4.66419e-75	3.78067e-181	1.41775e-179	[-1]	Group34	56.9672	139	[BCAS2, BUD31, CCAR1, CLP1, CPSF1, CPSF2, CPSF3, CPSF4, CRNKL1, CSTF1, CSTF3, CWC25, DDX23, DDX46, DDX5, DHX15, DHX16, DHX9, DNAJC8, EFTUD2, EIF4A3, FIP1L1, GLE1, GTF2F2, HNRNPC, HNRNPH1, HNRNPK, HNRNPL, HNRNPR, HNRNPU, ISY1, LSM2, LSM5, LSM6, LSM7, METTL14, METTL3, MTREX, NCBP1, NCBP2, NDC1, NUDT21, NUP133, NUP153, NUP155, NUP160, NUP205, NUP214, NUP35, NUP43, NUP62, NUP85, NUP88, NUP98, NXF1, P…
R-HSA:8953854	Metabolism of RNA	REACTOME_Pathways_27.02.2019	3.78067e-181	2.53683e-178	3.78067e-181	1.41775e-179	[-1]	Group34	51.1078	346	[BCAS2, BMS1, BOP1, BUD23, BUD31, BYSL, C1D, CCAR1, CCNH, CLNS1A, CLP1, CNOT3, CPSF1, CPSF2, CPSF3, CPSF4, CRNKL1, CSTF1, CSTF3, CTU2, CWC25, DDX1, DDX20, DDX21, DDX23, DDX46, DDX47, DDX49, DDX5, DDX6, DHX15, DHX16, DHX37, DHX9, DIMT1, DIS3, DNAJC8, EBNA1BP2, EDC4, EFTUD2, EIF4A1, EIF4A3, EIF4G1, ELAC2, ERCC2, ERCC3, ETF1, EXOSC1, EXOSC10, EXOSC2, EXOSC3, EXOSC4, EXOSC5, EXOSC6, EXOSC7, EXOSC8, F…
R-HSA:72165	mRNA Splicing - Minor Pathway	REACTOME_Pathways_27.02.2019	4.4107e-29	6.03996e-28	2.97616e-181	2.23212e-179	[-1]	Group47	75	39	[DDX23, EFTUD2, GTF2F2, LSM2, NCBP1, NCBP2, PDCD7, POLR2A, POLR2C, POLR2E, POLR2F, POLR2G, POLR2H, POLR2K, POLR2L, PRPF6, PRPF8, RNPC3, SF3B2, SF3B3, SF3B4, SF3B5, SNRNP200, SNRNP25, SNRNP35, SNRNP40, SNRNP48, SNRPD1, SNRPD2, SNRPD3, SNRPF, SNU13, SRSF1, SRSF2, SRSF6, TXNL4A, YBX1, ZCRB1, ZMAT5]
R-HSA:72172	mRNA Splicing	REACTOME_Pathways_27.02.2019	4.23709e-64	4.06155e-62	2.97616e-181	2.23212e-179	[-1]	Group47	58.6387	112	[BCAS2, BUD31, CCAR1, CLP1, CPSF1, CPSF2, CPSF3, CPSF4, CRNKL1, CSTF1, CSTF3, CWC25, DDX23, DDX46, DDX5, DHX15, DHX16, DHX9, DNAJC8, EFTUD2, EIF4A3, FIP1L1, GTF2F2, HNRNPC, HNRNPH1, HNRNPK, HNRNPL, HNRNPR, HNRNPU, ISY1, LSM2, LSM5, LSM6, LSM7, MTREX, NCBP1, NCBP2, NUDT21, PABPN1, PCBP2, PCF11, PDCD7, PHF5A, PLRG1, POLR2A, POLR2C, POLR2E, POLR2F, POLR2G, POLR2H, POLR2K, POLR2L, PPIL1, PPIL4, PPWD1…
R-HSA:72163	mRNA Splicing - Major Pathway	REACTOME_Pathways_27.02.2019	9.09051e-59	6.09973e-57	2.97616e-181	2.23212e-179	[-1]	Group47	57.377	105	[BCAS2, BUD31, CCAR1, CLP1, CPSF1, CPSF2, CPSF3, CPSF4, CRNKL1, CSTF1, CSTF3, CWC25, DDX23, DDX46, DDX5, DHX15, DHX16, DHX9, DNAJC8, EFTUD2, EIF4A3, FIP1L1, GTF2F2, HNRNPC, HNRNPH1, HNRNPK, HNRNPL, HNRNPR, HNRNPU, ISY1, LSM2, LSM5, LSM6, LSM7, MTREX, NCBP1, NCBP2, NUDT21, PABPN1, PCBP2, PCF11, PHF5A, PLRG1, POLR2A, POLR2C, POLR2E, POLR2F, POLR2G, POLR2H, POLR2K, POLR2L, PPIL1, PPIL4, PPWD1, PRPF1…
R-HSA:72203	Processing of Capped Intron-Containing Pre-mRNA	REACTOME_Pathways_27.02.2019	2.08533e-77	4.66419e-75	2.97616e-181	2.23212e-179	[-1]	Group47	56.9672	139	[BCAS2, BUD31, CCAR1, CLP1, CPSF1, CPSF2, CPSF3, CPSF4, CRNKL1, CSTF1, CSTF3, CWC25, DDX23, DDX46, DDX5, DHX15, DHX16, DHX9, DNAJC8, EFTUD2, EIF4A3, FIP1L1, GLE1, GTF2F2, HNRNPC, HNRNPH1, HNRNPK, HNRNPL, HNRNPR, HNRNPU, ISY1, LSM2, LSM5, LSM6, LSM7, METTL14, METTL3, MTREX, NCBP1, NCBP2, NDC1, NUDT21, NUP133, NUP153, NUP155, NUP160, NUP205, NUP214, NUP35, NUP43, NUP62, NUP85, NUP88, NUP98, NXF1, P…
KEGG:03040	Spliceosome	KEGG_27.02.2019	7.83921e-38	2.287e-36	2.97616e-181	2.23212e-179	[-1]	Group47	53.7313	72	[ACIN1, BCAS2, BUD31, CRNKL1, DDX23, DDX46, DDX5, DHX15, DHX16, DHX8, EFTUD2, EIF4A3, HNRNPC, HNRNPK, HNRNPU, ISY1, LSM2, LSM5, LSM6, LSM7, NCBP1, NCBP2, PHF5A, PLRG1, PPIL1, PRPF19, PRPF31, PRPF38A, PRPF38B, PRPF4, PRPF6, PRPF8, PUF60, RBM17, RBM22, RBM25, RBM8A, SART1, SF3A2, SF3A3, SF3B2, SF3B3, SF3B4, SF3B5, SLU7, SMNDC1, SNRNP200, SNRNP27, SNRNP40, SNRNP70, SNRPA, SNRPA1, SNRPD1, SNRPD2, SNR…
R-HSA:72202	Transport of Mature Transcript to Cytoplasm	REACTOME_Pathways_27.02.2019	6.07793e-22	4.7422e-21	2.97616e-181	2.23212e-179	[-1]	Group47	51.1905	43	[CPSF1, CPSF2, CPSF3, CPSF4, EIF4A3, FIP1L1, GLE1, NCBP1, NCBP2, NDC1, NUP133, NUP153, NUP155, NUP160, NUP205, NUP214, NUP35, NUP43, NUP62, NUP85, NUP88, NUP98, NXF1, RAE1, RBM8A, SARNP, SEC13, SEH1L, SLU7, SRRM1, SRSF1, SRSF2, SRSF3, SRSF6, SYMPK, THOC1, THOC3, THOC7, TPR, U2AF1, U2AF2, WDR33, ZC3H11A]
R-HSA:8953854	Metabolism of RNA	REACTOME_Pathways_27.02.2019	3.78067e-181	2.53683e-178	2.97616e-181	2.23212e-179	[-1]	Group47	51.1078	346	[BCAS2, BMS1, BOP1, BUD23, BUD31, BYSL, C1D, CCAR1, CCNH, CLNS1A, CLP1, CNOT3, CPSF1, CPSF2, CPSF3, CPSF4, CRNKL1, CSTF1, CSTF3, CTU2, CWC25, DDX1, DDX20, DDX21, DDX23, DDX46, DDX47, DDX49, DDX5, DDX6, DHX15, DHX16, DHX37, DHX9, DIMT1, DIS3, DNAJC8, EBNA1BP2, EDC4, EFTUD2, EIF4A1, EIF4A3, EIF4G1, ELAC2, ERCC2, ERCC3, ETF1, EXOSC1, EXOSC10, EXOSC2, EXOSC3, EXOSC4, EXOSC5, EXOSC6, EXOSC7, EXOSC8, F…
R-HSA:77595	Processing of Intronless Pre-mRNAs	REACTOME_Pathways_27.02.2019	1.78081e-12	6.56553e-12	5.40027e-120	1.35007e-118	[-1]	Group72	78.9474	15	[CLP1, CPSF1, CPSF2, CPSF3, CPSF4, CSTF1, CSTF3, FIP1L1, NCBP1, NCBP2, NUDT21, PABPN1, PCF11, SYMPK, WDR33]
R-HSA:167242	Abortive elongation of HIV-1 transcript in the absence of Tat	REACTOME_Pathways_27.02.2019	8.1798e-12	2.87364e-11	5.40027e-120	1.35007e-118	[-1]	Group72	69.5652	16	[CTDP1, GTF2F2, NCBP1, NCBP2, NELFA, NELFB, NELFE, POLR2A, POLR2C, POLR2E, POLR2F, POLR2G, POLR2H, POLR2K, POLR2L, SUPT5H]
R-HSA:159231	Transport of Mature mRNA Derived from an Intronless Transcript	REACTOME_Pathways_27.02.2019	3.9022e-18	2.29682e-17	5.40027e-120	1.35007e-118	[-1]	Group72	65.8537	27	[CPSF1, CPSF2, CPSF3, CPSF4, FIP1L1, NCBP1, NCBP2, NDC1, NUP133, NUP153, NUP155, NUP160, NUP205, NUP214, NUP35, NUP43, NUP62, NUP85, NUP88, NUP98, NXF1, RAE1, SEC13, SEH1L, SYMPK, TPR, WDR33]
R-HSA:159234	Transport of Mature mRNAs Derived from Intronless Transcripts	REACTOME_Pathways_27.02.2019	9.917e-18	5.45435e-17	5.40027e-120	1.35007e-118	[-1]	Group72	64.2857	27	[CPSF1, CPSF2, CPSF3, CPSF4, FIP1L1, NCBP1, NCBP2, NDC1, NUP133, NUP153, NUP155, NUP160, NUP205, NUP214, NUP35, NUP43, NUP62, NUP85, NUP88, NUP98, NXF1, RAE1, SEC13, SEH1L, SYMPK, TPR, WDR33]
R-HSA:191859	snRNP Assembly	REACTOME_Pathways_27.02.2019	9.56109e-21	6.61391e-20	5.40027e-120	1.35007e-118	[-1]	Group72	62.2642	33	[CLNS1A, DDX20, GEMIN4, GEMIN5, GEMIN6, GEMIN7, NCBP1, NCBP2, NDC1, NUP133, NUP153, NUP155, NUP160, NUP205, NUP214, NUP35, NUP43, NUP62, NUP85, NUP88, NUP98, PHAX, PRMT5, RAE1, SEC13, SEH1L, SNRPD1, SNRPD2, SNRPD3, SNRPF, SNUPN, TPR, WDR77]
R-HSA:194441	Metabolism of non-coding RNA	REACTOME_Pathways_27.02.2019	9.56109e-21	6.61391e-20	5.40027e-120	1.35007e-118	[-1]	Group72	62.2642	33	[CLNS1A, DDX20, GEMIN4, GEMIN5, GEMIN6, GEMIN7, NCBP1, NCBP2, NDC1, NUP133, NUP153, NUP155, NUP160, NUP205, NUP214, NUP35, NUP43, NUP62, NUP85, NUP88, NUP98, PHAX, PRMT5, RAE1, SEC13, SEH1L, SNRPD1, SNRPD2, SNRPD3, SNRPF, SNUPN, TPR, WDR77]
R-HSA:4615885	SUMOylation of DNA replication proteins	REACTOME_Pathways_27.02.2019	1.28952e-16	6.36226e-16	5.40027e-120	1.35007e-118	[-1]	Group72	60	27	[AURKB, BIRC5, CDCA8, INCENP, NDC1, NUP133, NUP153, NUP155, NUP160, NUP205, NUP214, NUP35, NUP43, NUP62, NUP85, NUP88, NUP98, PCNA, RAE1, RANGAP1, SEC13, SEH1L, SUMO2, TOP1, TOP2A, TPR, UBE2I]
R-HSA:6784531	tRNA processing in the nucleus	REACTOME_Pathways_27.02.2019	1.78784e-20	1.19964e-19	5.40027e-120	1.35007e-118	[-1]	Group72	59.6491	34	[CLP1, CPSF1, CPSF4, DDX1, ELAC2, NDC1, NUP133, NUP153, NUP155, NUP160, NUP205, NUP214, NUP35, NUP43, NUP62, NUP85, NUP88, NUP98, POP1, POP4, POP7, RAE1, RPP14, RPP21, RPP40, RTCB, RTRAF, SEC13, SEH1L, TPR, TRNT1, TSEN2, TSEN34, TSEN54]
R-HSA:159227	Transport of the SLBP independent Mature mRNA	REACTOME_Pathways_27.02.2019	2.04892e-12	7.47189e-12	5.40027e-120	1.35007e-118	[-1]	Group72	58.8235	20	[NCBP1, NCBP2, NDC1, NUP133, NUP153, NUP155, NUP160, NUP205, NUP214, NUP35, NUP43, NUP62, NUP85, NUP88, NUP98, NXF1, RAE1, SEC13, SEH1L, TPR]
R-HSA:8851708	Signaling by FGFR2 IIIa TM	REACTOME_Pathways_27.02.2019	2.73057e-07	6.66258e-07	5.40027e-120	1.35007e-118	[-1]	Group72	57.8947	11	[GTF2F2, NCBP1, NCBP2, POLR2A, POLR2C, POLR2E, POLR2F, POLR2G, POLR2H, POLR2K, POLR2L]
R-HSA:159230	Transport of the SLBP Dependant Mature mRNA	REACTOME_Pathways_27.02.2019	4.34294e-12	1.54186e-11	5.40027e-120	1.35007e-118	[-1]	Group72	57.1429	20	[NCBP1, NCBP2, NDC1, NUP133, NUP153, NUP155, NUP160, NUP205, NUP214, NUP35, NUP43, NUP62, NUP85, NUP88, NUP98, NXF1, RAE1, SEC13, SEH1L, TPR]
R-HSA:165054	Rev-mediated nuclear export of HIV RNA	REACTOME_Pathways_27.02.2019	4.34294e-12	1.54186e-11	5.40027e-120	1.35007e-118	[-1]	Group72	57.1429	20	[NDC1, NUP133, NUP153, NUP155, NUP160, NUP205, NUP214, NUP35, NUP43, NUP62, NUP85, NUP88, NUP98, RAE1, RANGAP1, RCC1, SEC13, SEH1L, TPR, XPO1]
R-HSA:72203	Processing of Capped Intron-Containing Pre-mRNA	REACTOME_Pathways_27.02.2019	2.08533e-77	4.66419e-75	5.40027e-120	1.35007e-118	[-1]	Group72	56.9672	139	[BCAS2, BUD31, CCAR1, CLP1, CPSF1, CPSF2, CPSF3, CPSF4, CRNKL1, CSTF1, CSTF3, CWC25, DDX23, DDX46, DDX5, DHX15, DHX16, DHX9, DNAJC8, EFTUD2, EIF4A3, FIP1L1, GLE1, GTF2F2, HNRNPC, HNRNPH1, HNRNPK, HNRNPL, HNRNPR, HNRNPU, ISY1, LSM2, LSM5, LSM6, LSM7, METTL14, METTL3, MTREX, NCBP1, NCBP2, NDC1, NUDT21, NUP133, NUP153, NUP155, NUP160, NUP205, NUP214, NUP35, NUP43, NUP62, NUP85, NUP88, NUP98, NXF1, P…
R-HSA:177243	Interactions of Rev with host cellular proteins	REACTOME_Pathways_27.02.2019	1.50358e-12	5.63633e-12	5.40027e-120	1.35007e-118	[-1]	Group72	56.7568	21	[NDC1, NPM1, NUP133, NUP153, NUP155, NUP160, NUP205, NUP214, NUP35, NUP43, NUP62, NUP85, NUP88, NUP98, RAE1, RANGAP1, RCC1, SEC13, SEH1L, TPR, XPO1]
R-HSA:180746	Nuclear import of Rev protein	REACTOME_Pathways_27.02.2019	2.57987e-11	8.8774e-11	5.40027e-120	1.35007e-118	[-1]	Group72	55.8824	19	[NDC1, NPM1, NUP133, NUP153, NUP155, NUP160, NUP205, NUP214, NUP35, NUP43, NUP62, NUP85, NUP88, NUP98, RAE1, RCC1, SEC13, SEH1L, TPR]
R-HSA:4085377	SUMOylation of SUMOylation proteins	REACTOME_Pathways_27.02.2019	2.57987e-11	8.8774e-11	5.40027e-120	1.35007e-118	[-1]	Group72	55.8824	19	[NDC1, NUP133, NUP153, NUP155, NUP160, NUP205, NUP214, NUP35, NUP43, NUP62, NUP85, NUP88, NUP98, RAE1, SEC13, SEH1L, SUMO2, TPR, UBE2I]
R-HSA:168325	Viral Messenger RNA Synthesis	REACTOME_Pathways_27.02.2019	7.36362e-15	3.14712e-14	5.40027e-120	1.35007e-118	[-1]	Group72	55.3191	26	[GTF2F2, NDC1, NUP133, NUP153, NUP155, NUP160, NUP205, NUP214, NUP35, NUP43, NUP62, NUP85, NUP88, NUP98, POLR2A, POLR2C, POLR2E, POLR2F, POLR2G, POLR2H, POLR2K, POLR2L, RAE1, SEC13, SEH1L, TPR]
R-HSA:170822	Regulation of Glucokinase by Glucokinase Regulatory Protein	REACTOME_Pathways_27.02.2019	4.37785e-10	1.35997e-09	5.40027e-120	1.35007e-118	[-1]	Group72	54.8387	17	[NDC1, NUP133, NUP153, NUP155, NUP160, NUP205, NUP214, NUP35, NUP43, NUP62, NUP85, NUP88, NUP98, RAE1, SEC13, SEH1L, TPR]
R-HSA:72187	mRNA 3'-end processing	REACTOME_Pathways_27.02.2019	7.25442e-16	3.35705e-15	5.40027e-120	1.35007e-118	[-1]	Group72	51.7241	30	[CLP1, CPSF1, CPSF2, CPSF3, CPSF4, CSTF1, CSTF3, EIF4A3, FIP1L1, NCBP1, NCBP2, NUDT21, PABPN1, PCF11, RBM8A, SARNP, SLU7, SRRM1, SRSF1, SRSF2, SRSF3, SRSF6, SYMPK, THOC1, THOC3, THOC7, U2AF1, U2AF2, WDR33, ZC3H11A]
R-HSA:180910	Vpr-mediated nuclear import of PICs	REACTOME_Pathways_27.02.2019	1.84288e-10	5.86054e-10	5.40027e-120	1.35007e-118	[-1]	Group72	51.3514	19	[BANF1, HMGA1, NDC1, NUP133, NUP153, NUP155, NUP160, NUP205, NUP214, NUP35, NUP43, NUP62, NUP85, NUP88, NUP98, RAE1, SEC13, SEH1L, TPR]
R-HSA:72202	Transport of Mature Transcript to Cytoplasm	REACTOME_Pathways_27.02.2019	6.07793e-22	4.7422e-21	5.40027e-120	1.35007e-118	[-1]	Group72	51.1905	43	[CPSF1, CPSF2, CPSF3, CPSF4, EIF4A3, FIP1L1, GLE1, NCBP1, NCBP2, NDC1, NUP133, NUP153, NUP155, NUP160, NUP205, NUP214, NUP35, NUP43, NUP62, NUP85, NUP88, NUP98, NXF1, RAE1, RBM8A, SARNP, SEC13, SEH1L, SLU7, SRRM1, SRSF1, SRSF2, SRSF3, SRSF6, SYMPK, THOC1, THOC3, THOC7, TPR, U2AF1, U2AF2, WDR33, ZC3H11A]
R-HSA:109688	Cleavage of Growing Transcript in the Termination Region	REACTOME_Pathways_27.02.2019	1.81321e-17	9.81182e-17	5.40027e-120	1.35007e-118	[-1]	Group72	50.7463	34	[CLP1, CPSF1, CPSF2, CPSF3, CPSF4, CSTF1, CSTF3, EIF4A3, FIP1L1, LSM10, LSM11, NCBP1, NCBP2, NUDT21, PABPN1, PCF11, RBM8A, SARNP, SLU7, SNRPD3, SNRPF, SRRM1, SRSF1, SRSF2, SRSF3, SRSF6, SYMPK, THOC1, THOC3, THOC7, U2AF1, U2AF2, WDR33, ZC3H11A]
R-HSA:73856	RNA Polymerase II Transcription Termination	REACTOME_Pathways_27.02.2019	1.81321e-17	9.81182e-17	5.40027e-120	1.35007e-118	[-1]	Group72	50.7463	34	[CLP1, CPSF1, CPSF2, CPSF3, CPSF4, CSTF1, CSTF3, EIF4A3, FIP1L1, LSM10, LSM11, NCBP1, NCBP2, NUDT21, PABPN1, PCF11, RBM8A, SARNP, SLU7, SNRPD3, SNRPF, SRRM1, SRSF1, SRSF2, SRSF3, SRSF6, SYMPK, THOC1, THOC3, THOC7, U2AF1, U2AF2, WDR33, ZC3H11A]
R-HSA:3232142	SUMOylation of ubiquitinylation proteins	REACTOME_Pathways_27.02.2019	3.34916e-10	1.05013e-09	5.40027e-120	1.35007e-118	[-1]	Group72	50	19	[NDC1, NUP133, NUP153, NUP155, NUP160, NUP205, NUP214, NUP35, NUP43, NUP62, NUP85, NUP88, NUP98, RAE1, SEC13, SEH1L, TPR, UBE2I, VHL]
R-HSA:6803529	FGFR2 alternative splicing	REACTOME_Pathways_27.02.2019	2.19236e-07	5.38854e-07	5.40027e-120	1.35007e-118	[-1]	Group72	50	13	[GTF2F2, HNRNPH1, NCBP1, NCBP2, POLR2A, POLR2C, POLR2E, POLR2F, POLR2G, POLR2H, POLR2K, POLR2L, PTBP1]
R-HSA:168273	Influenza Viral RNA Transcription and Replication	REACTOME_Pathways_27.02.2019	7.75417e-35	2.00117e-33	5.40027e-120	1.35007e-118	[-1]	Group72	49.6552	72	[GRSF1, GTF2F2, NDC1, NUP133, NUP153, NUP155, NUP160, NUP205, NUP214, NUP35, NUP43, NUP62, NUP85, NUP88, NUP98, POLR2A, POLR2C, POLR2E, POLR2F, POLR2G, POLR2H, POLR2K, POLR2L, RAE1, RPL10A, RPL12, RPL13, RPL13A, RPL14, RPL15, RPL18A, RPL19, RPL23, RPL24, RPL26, RPL27A, RPL28, RPL29, RPL3, RPL31, RPL35, RPL36, RPL36AL, RPL37, RPL37A, RPL38, RPL4, RPL7, RPL9, RPLP0, RPLP1, RPS11, RPS12, RPS13, RPS1…
R-HSA:168333	NEP/NS2 Interacts with the Cellular Export Machinery	REACTOME_Pathways_27.02.2019	1.74196e-09	5.14915e-09	5.40027e-120	1.35007e-118	[-1]	Group72	48.6486	18	[NDC1, NUP133, NUP153, NUP155, NUP160, NUP205, NUP214, NUP35, NUP43, NUP62, NUP85, NUP88, NUP98, RAE1, SEC13, SEH1L, TPR, XPO1]
R-HSA:168271	Transport of Ribonucleoproteins into the Host Nucleus	REACTOME_Pathways_27.02.2019	5.11681e-09	1.44868e-08	5.40027e-120	1.35007e-118	[-1]	Group72	48.5714	17	[NDC1, NUP133, NUP153, NUP155, NUP160, NUP205, NUP214, NUP35, NUP43, NUP62, NUP85, NUP88, NUP98, RAE1, SEC13, SEH1L, TPR]
R-HSA:3301854	Nuclear Pore Complex (NPC) Disassembly	REACTOME_Pathways_27.02.2019	5.11681e-09	1.44868e-08	5.40027e-120	1.35007e-118	[-1]	Group72	48.5714	17	[NDC1, NUP133, NUP153, NUP155, NUP160, NUP205, NUP214, NUP35, NUP43, NUP62, NUP85, NUP88, NUP98, RAE1, SEC13, SEH1L, TPR]
R-HSA:159236	Transport of Mature mRNA derived from an Intron-Containing Transcript	REACTOME_Pathways_27.02.2019	2.11089e-17	1.13313e-16	5.40027e-120	1.35007e-118	[-1]	Group72	48	36	[EIF4A3, GLE1, NCBP1, NCBP2, NDC1, NUP133, NUP153, NUP155, NUP160, NUP205, NUP214, NUP35, NUP43, NUP62, NUP85, NUP88, NUP98, NXF1, RAE1, RBM8A, SARNP, SEC13, SEH1L, SLU7, SRRM1, SRSF1, SRSF2, SRSF3, SRSF6, THOC1, THOC3, THOC7, TPR, U2AF1, U2AF2, ZC3H11A]
R-HSA:168255	Influenza Life Cycle	REACTOME_Pathways_27.02.2019	2.63246e-34	6.30851e-33	5.40027e-120	1.35007e-118	[-1]	Group72	47.7419	74	[CLTC, GRSF1, GTF2F2, NDC1, NUP133, NUP153, NUP155, NUP160, NUP205, NUP214, NUP35, NUP43, NUP62, NUP85, NUP88, NUP98, POLR2A, POLR2C, POLR2E, POLR2F, POLR2G, POLR2H, POLR2K, POLR2L, RAE1, RPL10A, RPL12, RPL13, RPL13A, RPL14, RPL15, RPL18A, RPL19, RPL23, RPL24, RPL26, RPL27A, RPL28, RPL29, RPL3, RPL31, RPL35, RPL36, RPL36AL, RPL37, RPL37A, RPL38, RPL4, RPL7, RPL9, RPLP0, RPLP1, RPS11, RPS12, RPS13…
R-HSA:176033	Interactions of Vpr with host cellular proteins	REACTOME_Pathways_27.02.2019	1.0272e-09	3.13297e-09	5.40027e-120	1.35007e-118	[-1]	Group72	47.5	19	[BANF1, HMGA1, NDC1, NUP133, NUP153, NUP155, NUP160, NUP205, NUP214, NUP35, NUP43, NUP62, NUP85, NUP88, NUP98, RAE1, SEC13, SEH1L, TPR]
R-HSA:162599	Late Phase of HIV Life Cycle	REACTOME_Pathways_27.02.2019	1.05656e-31	2.08516e-30	5.40027e-120	1.35007e-118	[-1]	Group72	47.2603	69	[CCNH, CCNK, CDK9, CHMP2A, CHMP5, CHMP6, CHMP7, CTDP1, ELL, ELOB, ERCC2, ERCC3, GTF2A1, GTF2A2, GTF2B, GTF2E1, GTF2E2, GTF2F2, GTF2H1, GTF2H3, GTF2H4, MNAT1, NCBP1, NCBP2, NDC1, NELFA, NELFB, NELFE, NUP133, NUP153, NUP155, NUP160, NUP205, NUP214, NUP35, NUP43, NUP62, NUP85, NUP88, NUP98, POLR2A, POLR2C, POLR2E, POLR2F, POLR2G, POLR2H, POLR2K, POLR2L, PPIA, RAE1, RANGAP1, RCC1, RNGTT, RNMT, SEC13,…
R-HSA:4570464	SUMOylation of RNA binding proteins	REACTOME_Pathways_27.02.2019	6.99613e-11	2.32396e-10	5.40027e-120	1.35007e-118	[-1]	Group72	46.8085	22	[HNRNPC, HNRNPK, NDC1, NOP58, NUP133, NUP153, NUP155, NUP160, NUP205, NUP214, NUP35, NUP43, NUP62, NUP85, NUP88, NUP98, RAE1, SEC13, SEH1L, SUMO2, TPR, UBE2I]
R-HSA:162587	HIV Life Cycle	REACTOME_Pathways_27.02.2019	2.27074e-33	4.76145e-32	5.40027e-120	1.35007e-118	[-1]	Group72	46.5409	74	[BANF1, CCNH, CCNK, CDK9, CHMP2A, CHMP5, CHMP6, CHMP7, CTDP1, ELL, ELOB, ERCC2, ERCC3, FEN1, GTF2A1, GTF2A2, GTF2B, GTF2E1, GTF2E2, GTF2F2, GTF2H1, GTF2H3, GTF2H4, HMGA1, MNAT1, NCBP1, NCBP2, NDC1, NELFA, NELFB, NELFE, NUP133, NUP153, NUP155, NUP160, NUP205, NUP214, NUP35, NUP43, NUP62, NUP85, NUP88, NUP98, POLR2A, POLR2C, POLR2E, POLR2F, POLR2G, POLR2H, POLR2K, POLR2L, PPIA, RAE1, RANGAP1, RCC1,…
R-HSA:168276	NS1 Mediated Effects on Host Pathways	REACTOME_Pathways_27.02.2019	1.73962e-09	5.16498e-09	5.40027e-120	1.35007e-118	[-1]	Group72	46.3415	19	[CPSF4, NDC1, NUP133, NUP153, NUP155, NUP160, NUP205, NUP214, NUP35, NUP43, NUP62, NUP85, NUP88, NUP98, PABPN1, RAE1, SEC13, SEH1L, TPR]
R-HSA:168274	Export of Viral Ribonucleoproteins from Nucleus	REACTOME_Pathways_27.02.2019	5.07818e-09	1.44384e-08	5.40027e-120	1.35007e-118	[-1]	Group72	46.1538	18	[NDC1, NUP133, NUP153, NUP155, NUP160, NUP205, NUP214, NUP35, NUP43, NUP62, NUP85, NUP88, NUP98, RAE1, SEC13, SEH1L, TPR, XPO1]
KEGG:03013	RNA transport	KEGG_27.02.2019	7.32951e-34	1.6959e-32	5.40027e-120	1.35007e-118	[-1]	Group72	46.0606	76	[ACIN1, CLNS1A, DDX20, EIF1, EIF2B1, EIF2B2, EIF2B3, EIF2B4, EIF2B5, EIF2S1, EIF2S2, EIF3A, EIF3B, EIF3D, EIF3E, EIF3F, EIF3H, EIF3I, EIF3J, EIF4A1, EIF4A3, EIF4G1, EIF4G2, EIF5, ELAC2, GEMIN4, GEMIN5, GEMIN6, GEMIN7, NCBP1, NCBP2, NDC1, NMD3, NUP133, NUP153, NUP155, NUP160, NUP205, NUP214, NUP35, NUP43, NUP62, NUP85, NUP88, NUP98, NXF1, PABPC1, PHAX, POP1, POP4, POP7, PRMT5, PYM1, RAE1, RANGAP1,…
R-HSA:162909	Host Interactions of HIV factors	REACTOME_Pathways_27.02.2019	1.01813e-27	1.17787e-26	5.40027e-120	1.35007e-118	[-1]	Group72	45.9259	62	[ATP6V1H, BANF1, CDK9, ELOB, HMGA1, NDC1, NPM1, NUP133, NUP153, NUP155, NUP160, NUP205, NUP214, NUP35, NUP43, NUP62, NUP85, NUP88, NUP98, PPIA, PSMA1, PSMA2, PSMA3, PSMA4, PSMA5, PSMA6, PSMA7, PSMB1, PSMB2, PSMB3, PSMB4, PSMB5, PSMB6, PSMB7, PSMC1, PSMC2, PSMC3, PSMC4, PSMC5, PSMC6, PSMD11, PSMD12, PSMD13, PSMD14, PSMD2, PSMD3, PSMD4, PSMD6, PSMD7, PSMD8, PSME1, RAE1, RANGAP1, RBX1, RCC1, SEC13, …
R-HSA:168254	Influenza Infection	REACTOME_Pathways_27.02.2019	1.2283e-33	2.74731e-32	5.40027e-120	1.35007e-118	[-1]	Group72	45.7831	76	[CLTC, CPSF4, GRSF1, GTF2F2, NDC1, NUP133, NUP153, NUP155, NUP160, NUP205, NUP214, NUP35, NUP43, NUP62, NUP85, NUP88, NUP98, PABPN1, POLR2A, POLR2C, POLR2E, POLR2F, POLR2G, POLR2H, POLR2K, POLR2L, RAE1, RPL10A, RPL12, RPL13, RPL13A, RPL14, RPL15, RPL18A, RPL19, RPL23, RPL24, RPL26, RPL27A, RPL28, RPL29, RPL3, RPL31, RPL35, RPL36, RPL36AL, RPL37, RPL37A, RPL38, RPL4, RPL7, RPL9, RPLP0, RPLP1, RPS1…
R-HSA:168253	Host Interactions with Influenza Factors	REACTOME_Pathways_27.02.2019	1.18259e-08	3.23886e-08	5.40027e-120	1.35007e-118	[-1]	Group72	42.2222	19	[CPSF4, NDC1, NUP133, NUP153, NUP155, NUP160, NUP205, NUP214, NUP35, NUP43, NUP62, NUP85, NUP88, NUP98, PABPN1, RAE1, SEC13, SEH1L, TPR]
R-HSA:203927	MicroRNA (miRNA) biogenesis	REACTOME_Pathways_27.02.2019	4.23362e-05	8.66084e-05	5.40027e-120	1.35007e-118	[-1]	Group72	41.6667	10	[DICER1, POLR2A, POLR2C, POLR2E, POLR2F, POLR2G, POLR2H, POLR2K, POLR2L, XPO5]
R-HSA:72306	tRNA processing	REACTOME_Pathways_27.02.2019	6.34689e-17	3.25096e-16	5.40027e-120	1.35007e-118	[-1]	Group72	40.1869	43	[CLP1, CPSF1, CPSF4, CTU2, DDX1, ELAC2, KIAA0391, NDC1, NUP133, NUP153, NUP155, NUP160, NUP205, NUP214, NUP35, NUP43, NUP62, NUP85, NUP88, NUP98, OSGEP, POP1, POP4, POP7, RAE1, RPP14, RPP21, RPP40, RTCB, RTRAF, SEC13, SEH1L, THG1L, TP53RK, TPR, TRMT10C, TRMT112, TRMT5, TRNT1, TSEN2, TSEN34, TSEN54, URM1]
R-HSA:2980766	Nuclear Envelope Breakdown	REACTOME_Pathways_27.02.2019	1.8978e-07	4.69899e-07	5.40027e-120	1.35007e-118	[-1]	Group72	36.5385	19	[BANF1, NDC1, NUP133, NUP153, NUP155, NUP160, NUP205, NUP214, NUP35, NUP43, NUP62, NUP85, NUP88, NUP98, PLK1, RAE1, SEC13, SEH1L, TPR]
R-HSA:73777	RNA Polymerase I Chain Elongation	REACTOME_Pathways_27.02.2019	1.53656e-10	4.95689e-10	5.40027e-120	1.35007e-118	[-1]	Group72	34.4444	31	[CCNH, ERCC2, ERCC3, GTF2H1, GTF2H3, GTF2H4, H2AFX, H2AFZ, H3F3A, HIST1H2BC, HIST1H2BJ, HIST1H2BL, HIST2H2AC, HIST2H2BE, HIST2H3D, MNAT1, POLR1A, POLR1B, POLR1C, POLR1E, POLR2E, POLR2F, POLR2H, POLR2K, POLR2L, TAF1B, TAF1C, TBP, TWISTNB, UBTF, ZNRD1]
R-HSA:70171	Glycolysis	REACTOME_Pathways_27.02.2019	2.75803e-08	7.40256e-08	5.40027e-120	1.35007e-118	[-1]	Group72	33.8028	24	[ALDOA, GAPDH, NDC1, NUP133, NUP153, NUP155, NUP160, NUP205, NUP214, NUP35, NUP43, NUP62, NUP85, NUP88, NUP98, PGAM1, PKM, PPP2CA, PPP2R1A, RAE1, SEC13, SEH1L, TPI1, TPR]
R-HSA:3108214	SUMOylation of DNA damage response and repair proteins	REACTOME_Pathways_27.02.2019	7.49717e-09	2.08739e-08	5.40027e-120	1.35007e-118	[-1]	Group72	33.7662	26	[BRCA1, NDC1, NSMCE1, NUP133, NUP153, NUP155, NUP160, NUP205, NUP214, NUP35, NUP43, NUP62, NUP85, NUP88, NUP98, RAD21, RAE1, RNF168, SEC13, SEH1L, SMC3, SMC5, SMC6, SUMO2, TPR, UBE2I]
R-HSA:1839126	FGFR2 mutant receptor activation	REACTOME_Pathways_27.02.2019	0.000192193	0.000372722	5.40027e-120	1.35007e-118	[-1]	Group72	33.3333	11	[GTF2F2, NCBP1, NCBP2, POLR2A, POLR2C, POLR2E, POLR2F, POLR2G, POLR2H, POLR2K, POLR2L]
R-HSA:1169408	ISG15 antiviral mechanism	REACTOME_Pathways_27.02.2019	5.08443e-08	1.31724e-07	5.40027e-120	1.35007e-118	[-1]	Group72	32.8767	24	[ARIH1, EIF4A1, EIF4A3, EIF4G1, EIF4G2, NDC1, NUP133, NUP153, NUP155, NUP160, NUP205, NUP214, NUP35, NUP43, NUP62, NUP85, NUP88, NUP98, RAE1, SEC13, SEH1L, TPR, UBC, UBE2N]
R-HSA:5578749	Transcriptional regulation by small RNAs	REACTOME_Pathways_27.02.2019	1.83296e-10	5.85674e-10	5.40027e-120	1.35007e-118	[-1]	Group72	32.0755	34	[H2AFX, H2AFZ, H3F3A, HIST1H2BC, HIST1H2BJ, HIST1H2BL, HIST2H2AC, HIST2H2BE, HIST2H3D, NDC1, NUP133, NUP153, NUP155, NUP160, NUP205, NUP214, NUP35, NUP43, NUP62, NUP85, NUP88, NUP98, POLR2A, POLR2C, POLR2E, POLR2F, POLR2G, POLR2H, POLR2K, POLR2L, RAE1, SEC13, SEH1L, TPR]
R-HSA:3371453	Regulation of HSF1-mediated heat shock response	REACTOME_Pathways_27.02.2019	3.35515e-07	8.12745e-07	5.40027e-120	1.35007e-118	[-1]	Group72	31.8841	22	[HSF1, HSPA9, NDC1, NUP133, NUP153, NUP155, NUP160, NUP205, NUP214, NUP35, NUP43, NUP62, NUP85, NUP88, NUP98, RAE1, RPA2, RPA3, RPS19BP1, SEC13, SEH1L, TPR]
R-HSA:1169410	Antiviral mechanism by IFN-stimulated genes	REACTOME_Pathways_27.02.2019	1.09849e-07	2.771e-07	5.40027e-120	1.35007e-118	[-1]	Group72	30.8642	25	[ABCE1, ARIH1, EIF4A1, EIF4A3, EIF4G1, EIF4G2, NDC1, NUP133, NUP153, NUP155, NUP160, NUP205, NUP214, NUP35, NUP43, NUP62, NUP85, NUP88, NUP98, RAE1, SEC13, SEH1L, TPR, UBC, UBE2N]
R-HSA:73854	RNA Polymerase I Promoter Clearance	REACTOME_Pathways_27.02.2019	2.3562e-09	6.90398e-09	5.40027e-120	1.35007e-118	[-1]	Group72	30	33	[CCNH, CHD4, ERCC2, ERCC3, GTF2H1, GTF2H3, GTF2H4, H2AFX, H2AFZ, H3F3A, HIST1H2BC, HIST1H2BJ, HIST1H2BL, HIST2H2AC, HIST2H2BE, HIST2H3D, MNAT1, POLR1A, POLR1B, POLR1C, POLR1E, POLR2E, POLR2F, POLR2H, POLR2K, POLR2L, RBBP4, TAF1B, TAF1C, TBP, TWISTNB, UBTF, ZNRD1]
R-HSA:3371556	Cellular response to heat stress	REACTOME_Pathways_27.02.2019	2.09746e-07	5.17424e-07	5.40027e-120	1.35007e-118	[-1]	Group72	29.2135	26	[HSF1, HSPA9, MLST8, MTOR, NDC1, NUP133, NUP153, NUP155, NUP160, NUP205, NUP214, NUP35, NUP43, NUP62, NUP85, NUP88, NUP98, RAE1, RPA2, RPA3, RPS19BP1, RPTOR, SEC13, SEH1L, TPR, VCP]
R-HSA:73864	RNA Polymerase I Transcription	REACTOME_Pathways_27.02.2019	6.41344e-09	1.80059e-08	5.40027e-120	1.35007e-118	[-1]	Group72	28.9474	33	[CCNH, CHD4, ERCC2, ERCC3, GTF2H1, GTF2H3, GTF2H4, H2AFX, H2AFZ, H3F3A, HIST1H2BC, HIST1H2BJ, HIST1H2BL, HIST2H2AC, HIST2H2BE, HIST2H3D, MNAT1, POLR1A, POLR1B, POLR1C, POLR1E, POLR2E, POLR2F, POLR2H, POLR2K, POLR2L, RBBP4, TAF1B, TAF1C, TBP, TWISTNB, UBTF, ZNRD1]
R-HSA:5250924	B-WICH complex positively regulates rRNA expression	REACTOME_Pathways_27.02.2019	3.40594e-07	8.22081e-07	5.40027e-120	1.35007e-118	[-1]	Group72	28.5714	26	[ACTB, DDX21, H2AFX, H2AFZ, H3F3A, HIST1H2BC, HIST1H2BJ, HIST1H2BL, HIST2H2AC, HIST2H2BE, HIST2H3D, MYBBP1A, POLR1A, POLR1B, POLR1C, POLR1E, POLR2E, POLR2F, POLR2H, POLR2K, POLR2L, TAF1B, TAF1C, TBP, TWISTNB, ZNRD1]
R-HSA:5655253	Signaling by FGFR2 in disease	REACTOME_Pathways_27.02.2019	0.000634608	0.00116984	5.40027e-120	1.35007e-118	[-1]	Group72	27.907	12	[GRB2, GTF2F2, NCBP1, NCBP2, POLR2A, POLR2C, POLR2E, POLR2F, POLR2G, POLR2H, POLR2K, POLR2L]
R-HSA:5601884	PIWI-interacting RNA (piRNA) biogenesis	REACTOME_Pathways_27.02.2019	0.00544102	0.00917318	5.40027e-120	1.35007e-118	[-1]	Group72	27.5862	8	[POLR2A, POLR2C, POLR2E, POLR2F, POLR2G, POLR2H, POLR2K, POLR2L]
R-HSA:70326	Glucose metabolism	REACTOME_Pathways_27.02.2019	1.27892e-06	2.92887e-06	5.40027e-120	1.35007e-118	[-1]	Group72	27.4725	25	[ALDOA, GAPDH, NDC1, NUP133, NUP153, NUP155, NUP160, NUP205, NUP214, NUP35, NUP43, NUP62, NUP85, NUP88, NUP98, PGAM1, PKM, PPP2CA, PPP2R1A, RAE1, SEC13, SEH1L, SLC25A10, TPI1, TPR]
R-HSA:4551638	SUMOylation of chromatin organization proteins	REACTOME_Pathways_27.02.2019	3.53335e-05	7.27264e-05	5.40027e-120	1.35007e-118	[-1]	Group72	26.7606	19	[NDC1, NUP133, NUP153, NUP155, NUP160, NUP205, NUP214, NUP35, NUP43, NUP62, NUP85, NUP88, NUP98, RAE1, SEC13, SEH1L, SUMO2, TPR, UBE2I]
R-HSA:211000	Gene Silencing by RNA	REACTOME_Pathways_27.02.2019	1.82241e-08	4.93078e-08	5.40027e-120	1.35007e-118	[-1]	Group72	26.4706	36	[DICER1, H2AFX, H2AFZ, H3F3A, HIST1H2BC, HIST1H2BJ, HIST1H2BL, HIST2H2AC, HIST2H2BE, HIST2H3D, NDC1, NUP133, NUP153, NUP155, NUP160, NUP205, NUP214, NUP35, NUP43, NUP62, NUP85, NUP88, NUP98, POLR2A, POLR2C, POLR2E, POLR2F, POLR2G, POLR2H, POLR2K, POLR2L, RAE1, SEC13, SEH1L, TPR, XPO5]
R-HSA:5250913	Positive epigenetic regulation of rRNA expression	REACTOME_Pathways_27.02.2019	8.86959e-07	2.07369e-06	5.40027e-120	1.35007e-118	[-1]	Group72	26.1682	28	[ACTB, CHD4, DDX21, H2AFX, H2AFZ, H3F3A, HIST1H2BC, HIST1H2BJ, HIST1H2BL, HIST2H2AC, HIST2H2BE, HIST2H3D, MYBBP1A, POLR1A, POLR1B, POLR1C, POLR1E, POLR2E, POLR2F, POLR2H, POLR2K, POLR2L, RBBP4, TAF1B, TAF1C, TBP, TWISTNB, ZNRD1]
R-HSA:68875	Mitotic Prophase	REACTOME_Pathways_27.02.2019	1.83107e-08	4.93433e-08	5.40027e-120	1.35007e-118	[-1]	Group72	26.0563	37	[BANF1, H2AFX, H2AFZ, H3F3A, HIST1H2BC, HIST1H2BJ, HIST1H2BL, HIST2H2AC, HIST2H2BE, HIST2H3D, MASTL, NCAPD3, NCAPG2, NCAPH2, NDC1, NUP133, NUP153, NUP155, NUP160, NUP205, NUP214, NUP35, NUP43, NUP62, NUP85, NUP88, NUP98, PLK1, PPP2CA, PPP2R1A, RAE1, SEC13, SEH1L, SET, SMC2, SMC4, TPR]
R-HSA:1226099	Signaling by FGFR in disease	REACTOME_Pathways_27.02.2019	0.000892263	0.00162252	5.40027e-120	1.35007e-118	[-1]	Group72	23.8095	15	[CPSF6, FGFR1OP, GRB2, GTF2F2, NCBP1, NCBP2, POLR2A, POLR2C, POLR2E, POLR2F, POLR2G, POLR2H, POLR2K, POLR2L, STAT5A]
R-HSA:2990846	SUMOylation	REACTOME_Pathways_27.02.2019	3.21441e-08	8.49161e-08	5.40027e-120	1.35007e-118	[-1]	Group72	23.4043	44	[AURKB, BIRC5, BRCA1, CDCA8, DDX5, HNRNPC, HNRNPK, INCENP, NDC1, NOP58, NPM1, NSMCE1, NUP133, NUP153, NUP155, NUP160, NUP205, NUP214, NUP35, NUP43, NUP62, NUP85, NUP88, NUP98, PCNA, RAD21, RAE1, RANGAP1, RNF168, SAE1, SEC13, SEH1L, SIN3A, SMC3, SMC5, SMC6, SUMO2, TOP1, TOP2A, TPR, UBA2, UBE2I, VHL, ZNF131]
R-HSA:3108232	SUMO E3 ligases SUMOylate target proteins	REACTOME_Pathways_27.02.2019	9.70286e-08	2.46614e-07	5.40027e-120	1.35007e-118	[-1]	Group72	23.0769	42	[AURKB, BIRC5, BRCA1, CDCA8, DDX5, HNRNPC, HNRNPK, INCENP, NDC1, NOP58, NPM1, NSMCE1, NUP133, NUP153, NUP155, NUP160, NUP205, NUP214, NUP35, NUP43, NUP62, NUP85, NUP88, NUP98, PCNA, RAD21, RAE1, RANGAP1, RNF168, SEC13, SEH1L, SIN3A, SMC3, SMC5, SMC6, SUMO2, TOP1, TOP2A, TPR, UBE2I, VHL, ZNF131]
R-HSA:2299718	Condensation of Prophase Chromosomes	REACTOME_Pathways_27.02.2019	0.00230544	0.00403904	5.40027e-120	1.35007e-118	[-1]	Group72	21.6216	16	[H2AFX, H2AFZ, H3F3A, HIST1H2BC, HIST1H2BJ, HIST1H2BL, HIST2H2AC, HIST2H2BE, HIST2H3D, NCAPD3, NCAPG2, NCAPH2, PLK1, SET, SMC2, SMC4]
R-HSA:452723	Transcriptional regulation of pluripotent stem cells	REACTOME_Pathways_27.02.2019	0.0243353	0.0372808	5.40027e-120	1.35007e-118	[-1]	Group72	21.6216	8	[POLR2A, POLR2C, POLR2E, POLR2F, POLR2G, POLR2H, POLR2K, POLR2L]
R-HSA:9018519	Estrogen-dependent gene expression	REACTOME_Pathways_27.02.2019	0.000417963	0.000785583	5.40027e-120	1.35007e-118	[-1]	Group72	19.3333	29	[CCND1, CDK9, DDX5, GTF2A1, GTF2A2, GTF2F2, H2AFX, H2AFZ, H3F3A, HIST1H2BC, HIST1H2BJ, HIST1H2BL, HIST2H2AC, HIST2H2BE, HIST2H3D, MYC, POLR2A, POLR2C, POLR2E, POLR2F, POLR2G, POLR2H, POLR2K, POLR2L, PRMT1, RAD21, SMC3, TBP, YY1]
R-HSA:8939211	ESR-mediated signaling	REACTOME_Pathways_27.02.2019	0.000613111	0.00113333	5.40027e-120	1.35007e-118	[-1]	Group72	18.5897	29	[CCND1, CDK9, DDX5, GTF2A1, GTF2A2, GTF2F2, H2AFX, H2AFZ, H3F3A, HIST1H2BC, HIST1H2BJ, HIST1H2BL, HIST2H2AC, HIST2H2BE, HIST2H3D, MYC, POLR2A, POLR2C, POLR2E, POLR2F, POLR2G, POLR2H, POLR2K, POLR2L, PRMT1, RAD21, SMC3, TBP, YY1]
R-HSA:5617472	Activation of anterior HOX genes in hindbrain development during early embryogenesis	REACTOME_Pathways_27.02.2019	0.00505856	0.00857145	5.40027e-120	1.35007e-118	[-1]	Group72	18.0328	22	[CTCF, H2AFX, H2AFZ, H3F3A, HDAC3, HIST1H2BC, HIST1H2BJ, HIST1H2BL, HIST2H2AC, HIST2H2BE, HIST2H3D, POLR2A, POLR2C, POLR2E, POLR2F, POLR2G, POLR2H, POLR2K, POLR2L, RBBP4, WDR5, YY1]
R-HSA:5619507	Activation of HOX genes during differentiation	REACTOME_Pathways_27.02.2019	0.00505856	0.00857145	5.40027e-120	1.35007e-118	[-1]	Group72	18.0328	22	[CTCF, H2AFX, H2AFZ, H3F3A, HDAC3, HIST1H2BC, HIST1H2BJ, HIST1H2BL, HIST2H2AC, HIST2H2BE, HIST2H3D, POLR2A, POLR2C, POLR2E, POLR2F, POLR2G, POLR2H, POLR2K, POLR2L, RBBP4, WDR5, YY1]
R-HSA:9006931	Signaling by Nuclear Receptors	REACTOME_Pathways_27.02.2019	0.029443	0.0445966	5.40027e-120	1.35007e-118	[-1]	Group72	14.5729	29	[CCND1, CDK9, DDX5, GTF2A1, GTF2A2, GTF2F2, H2AFX, H2AFZ, H3F3A, HIST1H2BC, HIST1H2BJ, HIST1H2BL, HIST2H2AC, HIST2H2BE, HIST2H3D, MYC, POLR2A, POLR2C, POLR2E, POLR2F, POLR2G, POLR2H, POLR2K, POLR2L, PRMT1, RAD21, SMC3, TBP, YY1]
R-HSA:6790901	rRNA modification in the nucleus and cytosol	REACTOME_Pathways_27.02.2019	8.68083e-24	8.09005e-23	1.69158e-93	3.17171e-92	[-1]	Group70	60.9375	39	[BMS1, BUD23, DDX47, DDX49, DHX37, DIMT1, GAR1, HEATR1, IMP4, KRR1, MPHOSPH10, NAT10, NHP2, NOL6, NOP10, NOP14, NOP2, NOP56, NOP58, PDCD11, RCL1, RPS14, RPS6, RPS7, RRP7A, RRP9, SNU13, TBL3, TRMT112, UTP11, UTP15, UTP20, UTP3, UTP4, UTP6, WDR3, WDR43, WDR46, WDR75]
R-HSA:8868773	rRNA processing in the nucleus and cytosol	REACTOME_Pathways_27.02.2019	1.10817e-66	1.48717e-64	1.69158e-93	3.17171e-92	[-1]	Group70	58.8832	116	[BMS1, BOP1, BUD23, BYSL, C1D, DDX21, DDX47, DDX49, DHX37, DIMT1, DIS3, EBNA1BP2, EXOSC1, EXOSC10, EXOSC2, EXOSC3, EXOSC4, EXOSC5, EXOSC6, EXOSC7, EXOSC8, FTSJ3, GAR1, GNL3, HEATR1, IMP4, ISG20L2, KRR1, LTV1, MPHOSPH10, MTREX, NAT10, NCL, NHP2, NIP7, NOB1, NOL12, NOL6, NOL9, NOP10, NOP14, NOP2, NOP56, NOP58, PDCD11, RBM28, RCL1, RIOK2, RPL10A, RPL12, RPL13, RPL13A, RPL14, RPL15, RPL18A, RPL19, RP…
R-HSA:72312	rRNA processing	REACTOME_Pathways_27.02.2019	4.62452e-69	7.75763e-67	1.69158e-93	3.17171e-92	[-1]	Group70	58.4541	121	[BMS1, BOP1, BUD23, BYSL, C1D, DDX21, DDX47, DDX49, DHX37, DIMT1, DIS3, EBNA1BP2, ELAC2, EXOSC1, EXOSC10, EXOSC2, EXOSC3, EXOSC4, EXOSC5, EXOSC6, EXOSC7, EXOSC8, FTSJ3, GAR1, GNL3, HEATR1, IMP4, ISG20L2, KIAA0391, KRR1, LTV1, MPHOSPH10, MRM2, MTREX, NAT10, NCL, NHP2, NIP7, NOB1, NOL12, NOL6, NOL9, NOP10, NOP14, NOP2, NOP56, NOP58, NSUN4, PDCD11, RBM28, RCL1, RIOK2, RPL10A, RPL12, RPL13, RPL13A, R…
R-HSA:6791226	Major pathway of rRNA processing in the nucleolus and cytosol	REACTOME_Pathways_27.02.2019	5.34846e-62	4.48602e-60	1.69158e-93	3.17171e-92	[-1]	Group70	58.2888	109	[BMS1, BOP1, BUD23, BYSL, C1D, DDX21, DDX47, DDX49, DHX37, DIS3, EBNA1BP2, EXOSC1, EXOSC10, EXOSC2, EXOSC3, EXOSC4, EXOSC5, EXOSC6, EXOSC7, EXOSC8, FTSJ3, GNL3, HEATR1, IMP4, ISG20L2, KRR1, LTV1, MPHOSPH10, MTREX, NCL, NIP7, NOB1, NOL12, NOL6, NOL9, NOP14, NOP56, NOP58, PDCD11, RBM28, RCL1, RIOK2, RPL10A, RPL12, RPL13, RPL13A, RPL14, RPL15, RPL18A, RPL19, RPL23, RPL24, RPL26, RPL27A, RPL28, RPL29…
R-HSA:72766	Translation	REACTOME_Pathways_27.02.2019	2.01659e-96	6.76567e-94	1.69158e-93	3.17171e-92	[-1]	Group70	58.0756	169	[AARS, AARS2, AURKAIP1, CARS, CHCHD1, DARS, DDOST, EARS2, EEF1B2, EEF1G, EEF2, EIF2B1, EIF2B2, EIF2B3, EIF2B4, EIF2B5, EIF2S1, EIF2S2, EIF3A, EIF3B, EIF3D, EIF3E, EIF3F, EIF3H, EIF3I, EIF3J, EIF3M, EIF4A1, EIF4G1, EIF5, ETF1, FARS2, FARSA, FARSB, GARS, GFM1, GSPT1, HARS, HARS2, IARS, IARS2, KARS, LARS, LARS2, MARS, MARS2, MRPL10, MRPL12, MRPL13, MRPL14, MRPL16, MRPL17, MRPL18, MRPL21, MRPL27, MRP…
R-HSA:72695	Formation of the ternary complex, and subsequently, the 43S complex	REACTOME_Pathways_27.02.2019	7.29213e-17	3.70683e-16	1.69158e-93	3.17171e-92	[-1]	Group70	56.8627	29	[EIF2S1, EIF2S2, EIF3A, EIF3B, EIF3D, EIF3E, EIF3F, EIF3H, EIF3I, EIF3J, EIF3M, RPS11, RPS12, RPS13, RPS14, RPS15A, RPS16, RPS17, RPS18, RPS19, RPS21, RPS23, RPS24, RPS25, RPS28, RPS6, RPS7, RPS8, RPSA]
R-HSA:168325	Viral Messenger RNA Synthesis	REACTOME_Pathways_27.02.2019	7.36362e-15	3.14712e-14	1.69158e-93	3.17171e-92	[-1]	Group70	55.3191	26	[GTF2F2, NDC1, NUP133, NUP153, NUP155, NUP160, NUP205, NUP214, NUP35, NUP43, NUP62, NUP85, NUP88, NUP98, POLR2A, POLR2C, POLR2E, POLR2F, POLR2G, POLR2H, POLR2K, POLR2L, RAE1, SEC13, SEH1L, TPR]
R-HSA:72649	Translation initiation complex formation	REACTOME_Pathways_27.02.2019	6.12363e-18	3.5422e-17	1.69158e-93	3.17171e-92	[-1]	Group70	55.1724	32	[EIF2S1, EIF2S2, EIF3A, EIF3B, EIF3D, EIF3E, EIF3F, EIF3H, EIF3I, EIF3J, EIF3M, EIF4A1, EIF4G1, PABPC1, RPS11, RPS12, RPS13, RPS14, RPS15A, RPS16, RPS17, RPS18, RPS19, RPS21, RPS23, RPS24, RPS25, RPS28, RPS6, RPS7, RPS8, RPSA]
R-HSA:72702	Ribosomal scanning and start codon recognition	REACTOME_Pathways_27.02.2019	6.12363e-18	3.5422e-17	1.69158e-93	3.17171e-92	[-1]	Group70	55.1724	32	[EIF2S1, EIF2S2, EIF3A, EIF3B, EIF3D, EIF3E, EIF3F, EIF3H, EIF3I, EIF3J, EIF3M, EIF4A1, EIF4G1, EIF5, RPS11, RPS12, RPS13, RPS14, RPS15A, RPS16, RPS17, RPS18, RPS19, RPS21, RPS23, RPS24, RPS25, RPS28, RPS6, RPS7, RPS8, RPSA]
R-HSA:975956	Nonsense Mediated Decay (NMD) independent of the Exon Junction Complex (EJC)	REACTOME_Pathways_27.02.2019	3.87294e-28	4.81248e-27	1.69158e-93	3.17171e-92	[-1]	Group70	54.7368	52	[EIF4G1, ETF1, GSPT1, NCBP1, NCBP2, PABPC1, RPL10A, RPL12, RPL13, RPL13A, RPL14, RPL15, RPL18A, RPL19, RPL23, RPL24, RPL26, RPL27A, RPL28, RPL29, RPL3, RPL31, RPL35, RPL36, RPL36AL, RPL37, RPL37A, RPL38, RPL4, RPL7, RPL9, RPLP0, RPLP1, RPS11, RPS12, RPS13, RPS14, RPS15A, RPS16, RPS17, RPS18, RPS19, RPS21, RPS23, RPS24, RPS25, RPS28, RPS6, RPS7, RPS8, RPSA, UPF1]
R-HSA:72613	Eukaryotic Translation Initiation	REACTOME_Pathways_27.02.2019	7.94075e-35	1.97342e-33	1.69158e-93	3.17171e-92	[-1]	Group70	54.6218	65	[EIF2B1, EIF2B2, EIF2B3, EIF2B4, EIF2B5, EIF2S1, EIF2S2, EIF3A, EIF3B, EIF3D, EIF3E, EIF3F, EIF3H, EIF3I, EIF3J, EIF3M, EIF4A1, EIF4G1, EIF5, PABPC1, RPL10A, RPL12, RPL13, RPL13A, RPL14, RPL15, RPL18A, RPL19, RPL23, RPL24, RPL26, RPL27A, RPL28, RPL29, RPL3, RPL31, RPL35, RPL36, RPL36AL, RPL37, RPL37A, RPL38, RPL4, RPL7, RPL9, RPLP0, RPLP1, RPS11, RPS12, RPS13, RPS14, RPS15A, RPS16, RPS17, RPS18, …
R-HSA:72737	Cap-dependent Translation Initiation	REACTOME_Pathways_27.02.2019	7.94075e-35	1.97342e-33	1.69158e-93	3.17171e-92	[-1]	Group70	54.6218	65	[EIF2B1, EIF2B2, EIF2B3, EIF2B4, EIF2B5, EIF2S1, EIF2S2, EIF3A, EIF3B, EIF3D, EIF3E, EIF3F, EIF3H, EIF3I, EIF3J, EIF3M, EIF4A1, EIF4G1, EIF5, PABPC1, RPL10A, RPL12, RPL13, RPL13A, RPL14, RPL15, RPL18A, RPL19, RPL23, RPL24, RPL26, RPL27A, RPL28, RPL29, RPL3, RPL31, RPL35, RPL36, RPL36AL, RPL37, RPL37A, RPL38, RPL4, RPL7, RPL9, RPLP0, RPLP1, RPS11, RPS12, RPS13, RPS14, RPS15A, RPS16, RPS17, RPS18, …
R-HSA:72662	Activation of the mRNA upon binding of the cap-binding complex and eIFs, and subsequent binding to 43S	REACTOME_Pathways_27.02.2019	1.21431e-17	6.62439e-17	1.69158e-93	3.17171e-92	[-1]	Group70	54.2373	32	[EIF2S1, EIF2S2, EIF3A, EIF3B, EIF3D, EIF3E, EIF3F, EIF3H, EIF3I, EIF3J, EIF3M, EIF4A1, EIF4G1, PABPC1, RPS11, RPS12, RPS13, RPS14, RPS15A, RPS16, RPS17, RPS18, RPS19, RPS21, RPS23, RPS24, RPS25, RPS28, RPS6, RPS7, RPS8, RPSA]
R-HSA:1799339	SRP-dependent cotranslational protein targeting to membrane	REACTOME_Pathways_27.02.2019	1.35831e-31	2.60407e-30	1.69158e-93	3.17171e-92	[-1]	Group70	53.5714	60	[DDOST, RPL10A, RPL12, RPL13, RPL13A, RPL14, RPL15, RPL18A, RPL19, RPL23, RPL24, RPL26, RPL27A, RPL28, RPL29, RPL3, RPL31, RPL35, RPL36, RPL36AL, RPL37, RPL37A, RPL38, RPL4, RPL7, RPL9, RPLP0, RPLP1, RPN1, RPN2, RPS11, RPS12, RPS13, RPS14, RPS15A, RPS16, RPS17, RPS18, RPS19, RPS21, RPS23, RPS24, RPS25, RPS28, RPS6, RPS7, RPS8, RPSA, SEC61A1, SEC61B, SEC61G, SPCS2, SPCS3, SRP14, SRP19, SRP54, SRP7…
R-HSA:72689	Formation of a pool of free 40S subunits	REACTOME_Pathways_27.02.2019	1.73332e-28	2.28051e-27	1.69158e-93	3.17171e-92	[-1]	Group70	53.4653	54	[EIF3A, EIF3B, EIF3D, EIF3E, EIF3F, EIF3H, EIF3I, EIF3J, EIF3M, RPL10A, RPL12, RPL13, RPL13A, RPL14, RPL15, RPL18A, RPL19, RPL23, RPL24, RPL26, RPL27A, RPL28, RPL29, RPL3, RPL31, RPL35, RPL36, RPL36AL, RPL37, RPL37A, RPL38, RPL4, RPL7, RPL9, RPLP0, RPLP1, RPS11, RPS12, RPS13, RPS14, RPS15A, RPS16, RPS17, RPS18, RPS19, RPS21, RPS23, RPS24, RPS25, RPS28, RPS6, RPS7, RPS8, RPSA]
R-HSA:156827	L13a-mediated translational silencing of Ceruloplasmin expression	REACTOME_Pathways_27.02.2019	7.76978e-31	1.30338e-29	1.69158e-93	3.17171e-92	[-1]	Group70	53.1532	59	[EIF2S1, EIF2S2, EIF3A, EIF3B, EIF3D, EIF3E, EIF3F, EIF3H, EIF3I, EIF3J, EIF3M, EIF4A1, EIF4G1, PABPC1, RPL10A, RPL12, RPL13, RPL13A, RPL14, RPL15, RPL18A, RPL19, RPL23, RPL24, RPL26, RPL27A, RPL28, RPL29, RPL3, RPL31, RPL35, RPL36, RPL36AL, RPL37, RPL37A, RPL38, RPL4, RPL7, RPL9, RPLP0, RPLP1, RPS11, RPS12, RPS13, RPS14, RPS15A, RPS16, RPS17, RPS18, RPS19, RPS21, RPS23, RPS24, RPS25, RPS28, RPS6…
R-HSA:72764	Eukaryotic Translation Termination	REACTOME_Pathways_27.02.2019	1.41666e-25	1.46243e-24	1.69158e-93	3.17171e-92	[-1]	Group70	52.6882	49	[ETF1, GSPT1, N6AMT1, RPL10A, RPL12, RPL13, RPL13A, RPL14, RPL15, RPL18A, RPL19, RPL23, RPL24, RPL26, RPL27A, RPL28, RPL29, RPL3, RPL31, RPL35, RPL36, RPL36AL, RPL37, RPL37A, RPL38, RPL4, RPL7, RPL9, RPLP0, RPLP1, RPS11, RPS12, RPS13, RPS14, RPS15A, RPS16, RPS17, RPS18, RPS19, RPS21, RPS23, RPS24, RPS25, RPS28, RPS6, RPS7, RPS8, RPSA, TRMT112]
R-HSA:72706	GTP hydrolysis and joining of the 60S ribosomal subunit	REACTOME_Pathways_27.02.2019	1.49071e-30	2.38158e-29	1.69158e-93	3.17171e-92	[-1]	Group70	52.6786	59	[EIF2S1, EIF2S2, EIF3A, EIF3B, EIF3D, EIF3E, EIF3F, EIF3H, EIF3I, EIF3J, EIF3M, EIF4A1, EIF4G1, EIF5, RPL10A, RPL12, RPL13, RPL13A, RPL14, RPL15, RPL18A, RPL19, RPL23, RPL24, RPL26, RPL27A, RPL28, RPL29, RPL3, RPL31, RPL35, RPL36, RPL36AL, RPL37, RPL37A, RPL38, RPL4, RPL7, RPL9, RPLP0, RPLP1, RPS11, RPS12, RPS13, RPS14, RPS15A, RPS16, RPS17, RPS18, RPS19, RPS21, RPS23, RPS24, RPS25, RPS28, RPS6, …
R-HSA:927802	Nonsense-Mediated Decay (NMD)	REACTOME_Pathways_27.02.2019	9.5682e-31	1.56592e-29	1.69158e-93	3.17171e-92	[-1]	Group70	52.1739	60	[EIF4A3, EIF4G1, ETF1, GSPT1, NCBP1, NCBP2, PABPC1, PPP2CA, PPP2R1A, RBM8A, RPL10A, RPL12, RPL13, RPL13A, RPL14, RPL15, RPL18A, RPL19, RPL23, RPL24, RPL26, RPL27A, RPL28, RPL29, RPL3, RPL31, RPL35, RPL36, RPL36AL, RPL37, RPL37A, RPL38, RPL4, RPL7, RPL9, RPLP0, RPLP1, RPS11, RPS12, RPS13, RPS14, RPS15A, RPS16, RPS17, RPS18, RPS19, RPS21, RPS23, RPS24, RPS25, RPS28, RPS6, RPS7, RPS8, RPSA, SMG1, SM…
R-HSA:975957	Nonsense Mediated Decay (NMD) enhanced by the Exon Junction Complex (EJC)	REACTOME_Pathways_27.02.2019	9.5682e-31	1.56592e-29	1.69158e-93	3.17171e-92	[-1]	Group70	52.1739	60	[EIF4A3, EIF4G1, ETF1, GSPT1, NCBP1, NCBP2, PABPC1, PPP2CA, PPP2R1A, RBM8A, RPL10A, RPL12, RPL13, RPL13A, RPL14, RPL15, RPL18A, RPL19, RPL23, RPL24, RPL26, RPL27A, RPL28, RPL29, RPL3, RPL31, RPL35, RPL36, RPL36AL, RPL37, RPL37A, RPL38, RPL4, RPL7, RPL9, RPLP0, RPLP1, RPS11, RPS12, RPS13, RPS14, RPS15A, RPS16, RPS17, RPS18, RPS19, RPS21, RPS23, RPS24, RPS25, RPS28, RPS6, RPS7, RPS8, RPSA, SMG1, SM…
R-HSA:9010553	Regulation of expression of SLITs and ROBOs	REACTOME_Pathways_27.02.2019	4.48449e-45	1.88068e-43	1.69158e-93	3.17171e-92	[-1]	Group70	52.0468	89	[EIF4A3, EIF4G1, ELOB, ETF1, GSPT1, NCBP1, NCBP2, PABPC1, PSMA1, PSMA2, PSMA3, PSMA4, PSMA5, PSMA6, PSMA7, PSMB1, PSMB2, PSMB3, PSMB4, PSMB5, PSMB6, PSMB7, PSMC1, PSMC2, PSMC3, PSMC4, PSMC5, PSMC6, PSMD11, PSMD12, PSMD13, PSMD14, PSMD2, PSMD3, PSMD4, PSMD6, PSMD7, PSMD8, PSME1, RBM8A, RBX1, RPL10A, RPL12, RPL13, RPL13A, RPL14, RPL15, RPL18A, RPL19, RPL23, RPL24, RPL26, RPL27A, RPL28, RPL29, RPL3,…
R-HSA:156902	Peptide chain elongation	REACTOME_Pathways_27.02.2019	1.2855e-23	1.16564e-22	1.69158e-93	3.17171e-92	[-1]	Group70	51.6854	46	[EEF2, RPL10A, RPL12, RPL13, RPL13A, RPL14, RPL15, RPL18A, RPL19, RPL23, RPL24, RPL26, RPL27A, RPL28, RPL29, RPL3, RPL31, RPL35, RPL36, RPL36AL, RPL37, RPL37A, RPL38, RPL4, RPL7, RPL9, RPLP0, RPLP1, RPS11, RPS12, RPS13, RPS14, RPS15A, RPS16, RPS17, RPS18, RPS19, RPS21, RPS23, RPS24, RPS25, RPS28, RPS6, RPS7, RPS8, RPSA]
R-HSA:156842	Eukaryotic Translation Elongation	REACTOME_Pathways_27.02.2019	1.48306e-24	1.46344e-23	1.69158e-93	3.17171e-92	[-1]	Group70	51.6129	48	[EEF1B2, EEF1G, EEF2, RPL10A, RPL12, RPL13, RPL13A, RPL14, RPL15, RPL18A, RPL19, RPL23, RPL24, RPL26, RPL27A, RPL28, RPL29, RPL3, RPL31, RPL35, RPL36, RPL36AL, RPL37, RPL37A, RPL38, RPL4, RPL7, RPL9, RPLP0, RPLP1, RPS11, RPS12, RPS13, RPS14, RPS15A, RPS16, RPS17, RPS18, RPS19, RPS21, RPS23, RPS24, RPS25, RPS28, RPS6, RPS7, RPS8, RPSA]
R-HSA:2408557	Selenocysteine synthesis	REACTOME_Pathways_27.02.2019	1.48306e-24	1.46344e-23	1.69158e-93	3.17171e-92	[-1]	Group70	51.6129	48	[PSTK, RPL10A, RPL12, RPL13, RPL13A, RPL14, RPL15, RPL18A, RPL19, RPL23, RPL24, RPL26, RPL27A, RPL28, RPL29, RPL3, RPL31, RPL35, RPL36, RPL36AL, RPL37, RPL37A, RPL38, RPL4, RPL7, RPL9, RPLP0, RPLP1, RPS11, RPS12, RPS13, RPS14, RPS15A, RPS16, RPS17, RPS18, RPS19, RPS21, RPS23, RPS24, RPS25, RPS28, RPS6, RPS7, RPS8, RPSA, SARS, SEPHS2]
R-HSA:8953854	Metabolism of RNA	REACTOME_Pathways_27.02.2019	3.78067e-181	2.53683e-178	1.69158e-93	3.17171e-92	[-1]	Group70	51.1078	346	[BCAS2, BMS1, BOP1, BUD23, BUD31, BYSL, C1D, CCAR1, CCNH, CLNS1A, CLP1, CNOT3, CPSF1, CPSF2, CPSF3, CPSF4, CRNKL1, CSTF1, CSTF3, CTU2, CWC25, DDX1, DDX20, DDX21, DDX23, DDX46, DDX47, DDX49, DDX5, DDX6, DHX15, DHX16, DHX37, DHX9, DIMT1, DIS3, DNAJC8, EBNA1BP2, EDC4, EFTUD2, EIF4A1, EIF4A3, EIF4G1, ELAC2, ERCC2, ERCC3, ETF1, EXOSC1, EXOSC10, EXOSC2, EXOSC3, EXOSC4, EXOSC5, EXOSC6, EXOSC7, EXOSC8, F…
R-HSA:168273	Influenza Viral RNA Transcription and Replication	REACTOME_Pathways_27.02.2019	7.75417e-35	2.00117e-33	1.69158e-93	3.17171e-92	[-1]	Group70	49.6552	72	[GRSF1, GTF2F2, NDC1, NUP133, NUP153, NUP155, NUP160, NUP205, NUP214, NUP35, NUP43, NUP62, NUP85, NUP88, NUP98, POLR2A, POLR2C, POLR2E, POLR2F, POLR2G, POLR2H, POLR2K, POLR2L, RAE1, RPL10A, RPL12, RPL13, RPL13A, RPL14, RPL15, RPL18A, RPL19, RPL23, RPL24, RPL26, RPL27A, RPL28, RPL29, RPL3, RPL31, RPL35, RPL36, RPL36AL, RPL37, RPL37A, RPL38, RPL4, RPL7, RPL9, RPLP0, RPLP1, RPS11, RPS12, RPS13, RPS1…
R-HSA:168255	Influenza Life Cycle	REACTOME_Pathways_27.02.2019	2.63246e-34	6.30851e-33	1.69158e-93	3.17171e-92	[-1]	Group70	47.7419	74	[CLTC, GRSF1, GTF2F2, NDC1, NUP133, NUP153, NUP155, NUP160, NUP205, NUP214, NUP35, NUP43, NUP62, NUP85, NUP88, NUP98, POLR2A, POLR2C, POLR2E, POLR2F, POLR2G, POLR2H, POLR2K, POLR2L, RAE1, RPL10A, RPL12, RPL13, RPL13A, RPL14, RPL15, RPL18A, RPL19, RPL23, RPL24, RPL26, RPL27A, RPL28, RPL29, RPL3, RPL31, RPL35, RPL36, RPL36AL, RPL37, RPL37A, RPL38, RPL4, RPL7, RPL9, RPLP0, RPLP1, RPS11, RPS12, RPS13…
KEGG:03010	Ribosome	KEGG_27.02.2019	6.91358e-33	1.40576e-31	1.69158e-93	3.17171e-92	[-1]	Group70	47.0588	72	[FAU, MRPL10, MRPL12, MRPL13, MRPL14, MRPL16, MRPL17, MRPL18, MRPL21, MRPL27, MRPL28, MRPL3, MRPL34, MRPL4, MRPL9, MRPS10, MRPS12, MRPS14, MRPS16, MRPS18A, MRPS2, MRPS21, MRPS5, MRPS6, MRPS7, MRPS9, RPL10A, RPL12, RPL13, RPL13A, RPL14, RPL15, RPL18A, RPL19, RPL23, RPL24, RPL26, RPL27A, RPL28, RPL29, RPL3, RPL31, RPL35, RPL36, RPL36AL, RPL37, RPL37A, RPL38, RPL4, RPL7, RPL9, RPLP0, RPLP1, RPS11, R…
R-HSA:192823	Viral mRNA Translation	REACTOME_Pathways_27.02.2019	6.53688e-21	4.6171e-20	1.69158e-93	3.17171e-92	[-1]	Group70	46	46	[GRSF1, RPL10A, RPL12, RPL13, RPL13A, RPL14, RPL15, RPL18A, RPL19, RPL23, RPL24, RPL26, RPL27A, RPL28, RPL29, RPL3, RPL31, RPL35, RPL36, RPL36AL, RPL37, RPL37A, RPL38, RPL4, RPL7, RPL9, RPLP0, RPLP1, RPS11, RPS12, RPS13, RPS14, RPS15A, RPS16, RPS17, RPS18, RPS19, RPS21, RPS23, RPS24, RPS25, RPS28, RPS6, RPS7, RPS8, RPSA]
R-HSA:168254	Influenza Infection	REACTOME_Pathways_27.02.2019	1.2283e-33	2.74731e-32	1.69158e-93	3.17171e-92	[-1]	Group70	45.7831	76	[CLTC, CPSF4, GRSF1, GTF2F2, NDC1, NUP133, NUP153, NUP155, NUP160, NUP205, NUP214, NUP35, NUP43, NUP62, NUP85, NUP88, NUP98, PABPN1, POLR2A, POLR2C, POLR2E, POLR2F, POLR2G, POLR2H, POLR2K, POLR2L, RAE1, RPL10A, RPL12, RPL13, RPL13A, RPL14, RPL15, RPL18A, RPL19, RPL23, RPL24, RPL26, RPL27A, RPL28, RPL29, RPL3, RPL31, RPL35, RPL36, RPL36AL, RPL37, RPL37A, RPL38, RPL4, RPL7, RPL9, RPLP0, RPLP1, RPS1…
R-HSA:2408522	Selenoamino acid metabolism	REACTOME_Pathways_27.02.2019	3.38383e-24	3.24364e-23	1.69158e-93	3.17171e-92	[-1]	Group70	45.7627	54	[DARS, IARS, KARS, LARS, MARS, PSTK, QARS, RPL10A, RPL12, RPL13, RPL13A, RPL14, RPL15, RPL18A, RPL19, RPL23, RPL24, RPL26, RPL27A, RPL28, RPL29, RPL3, RPL31, RPL35, RPL36, RPL36AL, RPL37, RPL37A, RPL38, RPL4, RPL7, RPL9, RPLP0, RPLP1, RPS11, RPS12, RPS13, RPS14, RPS15A, RPS16, RPS17, RPS18, RPS19, RPS21, RPS23, RPS24, RPS25, RPS28, RPS6, RPS7, RPS8, RPSA, SARS, SEPHS2]
R-HSA:376176	Signaling by ROBO receptors	REACTOME_Pathways_27.02.2019	3.85417e-36	1.03446e-34	1.69158e-93	3.17171e-92	[-1]	Group70	41.7431	91	[CAP1, EIF4A3, EIF4G1, ELOB, ETF1, GSPT1, NCBP1, NCBP2, PABPC1, PFN1, PSMA1, PSMA2, PSMA3, PSMA4, PSMA5, PSMA6, PSMA7, PSMB1, PSMB2, PSMB3, PSMB4, PSMB5, PSMB6, PSMB7, PSMC1, PSMC2, PSMC3, PSMC4, PSMC5, PSMC6, PSMD11, PSMD12, PSMD13, PSMD14, PSMD2, PSMD3, PSMD4, PSMD6, PSMD7, PSMD8, PSME1, RBM8A, RBX1, RPL10A, RPL12, RPL13, RPL13A, RPL14, RPL15, RPL18A, RPL19, RPL23, RPL24, RPL26, RPL27A, RPL28, …
R-HSA:5663205	Infectious disease	REACTOME_Pathways_27.02.2019	3.73877e-56	2.28065e-54	1.69158e-93	3.17171e-92	[-1]	Group70	37.0455	163	[ATP6V1H, BANF1, CBLL1, CCNH, CCNK, CDK9, CHMP2A, CHMP5, CHMP6, CHMP7, CLTC, CPSF4, CTDP1, EEF2, ELL, ELOB, ERCC2, ERCC3, FEN1, GRB2, GRSF1, GTF2A1, GTF2A2, GTF2B, GTF2E1, GTF2E2, GTF2F2, GTF2H1, GTF2H3, GTF2H4, HGS, HMGA1, MNAT1, NCBP1, NCBP2, NDC1, NELFA, NELFB, NELFE, NPM1, NUP133, NUP153, NUP155, NUP160, NUP205, NUP214, NUP35, NUP43, NUP62, NUP85, NUP88, NUP98, PABPN1, POLR2A, POLR2C, POLR2E,…
R-HSA:5578749	Transcriptional regulation by small RNAs	REACTOME_Pathways_27.02.2019	1.83296e-10	5.85674e-10	1.69158e-93	3.17171e-92	[-1]	Group70	32.0755	34	[H2AFX, H2AFZ, H3F3A, HIST1H2BC, HIST1H2BJ, HIST1H2BL, HIST2H2AC, HIST2H2BE, HIST2H3D, NDC1, NUP133, NUP153, NUP155, NUP160, NUP205, NUP214, NUP35, NUP43, NUP62, NUP85, NUP88, NUP98, POLR2A, POLR2C, POLR2E, POLR2F, POLR2G, POLR2H, POLR2K, POLR2L, RAE1, SEC13, SEH1L, TPR]
R-HSA:211000	Gene Silencing by RNA	REACTOME_Pathways_27.02.2019	1.82241e-08	4.93078e-08	1.69158e-93	3.17171e-92	[-1]	Group70	26.4706	36	[DICER1, H2AFX, H2AFZ, H3F3A, HIST1H2BC, HIST1H2BJ, HIST1H2BL, HIST2H2AC, HIST2H2BE, HIST2H3D, NDC1, NUP133, NUP153, NUP155, NUP160, NUP205, NUP214, NUP35, NUP43, NUP62, NUP85, NUP88, NUP98, POLR2A, POLR2C, POLR2E, POLR2F, POLR2G, POLR2H, POLR2K, POLR2L, RAE1, SEC13, SEH1L, TPR, XPO5]
R-HSA:71291	Metabolism of amino acids and derivatives	REACTOME_Pathways_27.02.2019	1.21728e-16	6.05031e-16	1.69158e-93	3.17171e-92	[-1]	Group70	24.3243	90	[DARS, IARS, KARS, LARS, MARS, NDUFAB1, PRODH2, PSMA1, PSMA2, PSMA3, PSMA4, PSMA5, PSMA6, PSMA7, PSMB1, PSMB2, PSMB3, PSMB4, PSMB5, PSMB6, PSMB7, PSMC1, PSMC2, PSMC3, PSMC4, PSMC5, PSMC6, PSMD11, PSMD12, PSMD13, PSMD14, PSMD2, PSMD3, PSMD4, PSMD6, PSMD7, PSMD8, PSME1, PSTK, QARS, RPL10A, RPL12, RPL13, RPL13A, RPL14, RPL15, RPL18A, RPL19, RPL23, RPL24, RPL26, RPL27A, RPL28, RPL29, RPL3, RPL31, RPL…
R-HSA:422475	Axon guidance	REACTOME_Pathways_27.02.2019	1.91702e-11	6.63051e-11	1.69158e-93	3.17171e-92	[-1]	Group70	18.9873	105	[ACTB, ACTG1, ACTR2, ARPC3, CACNB3, CAP1, CLTC, CSNK2B, DNM2, EIF4A3, EIF4G1, ELOB, ETF1, GRB2, GSPT1, NCBP1, NCBP2, PABPC1, PFN1, PSMA1, PSMA2, PSMA3, PSMA4, PSMA5, PSMA6, PSMA7, PSMB1, PSMB2, PSMB3, PSMB4, PSMB5, PSMB6, PSMB7, PSMC1, PSMC2, PSMC3, PSMC4, PSMC5, PSMC6, PSMD11, PSMD12, PSMD13, PSMD14, PSMD2, PSMD3, PSMD4, PSMD6, PSMD7, PSMD8, PSME1, PTK2, PTPN11, RBM8A, RBX1, RPL10A, RPL12, RPL13…
R-HSA:1643685	Disease	REACTOME_Pathways_27.02.2019	1.18166e-16	5.91712e-16	1.69158e-93	3.17171e-92	[-1]	Group70	17.3642	195	[ACTB, ACTG1, ALG1, ALG14, ALG2, ATP6V1H, BANF1, CBLL1, CCDC59, CCNH, CCNK, CDK9, CHMP2A, CHMP5, CHMP6, CHMP7, CLTC, CPSF4, CPSF6, CSNK1A1, CTDP1, CUL1, DHDDS, DOLK, DPAGT1, DPM2, EEF2, ELL, ELOB, ERCC2, ERCC3, FDXR, FEN1, FGFR1OP, GRB2, GRSF1, GTF2A1, GTF2A2, GTF2B, GTF2E1, GTF2E2, GTF2F2, GTF2H1, GTF2H3, GTF2H4, HDAC3, HGS, HMGA1, MLST8, MNAT1, MTOR, MYC, NCBP1, NCBP2, NDC1, NELFA, NELFB, NELFE…
R-HSA:1266738	Developmental Biology	REACTOME_Pathways_27.02.2019	0.000103743	0.000206563	1.69158e-93	3.17171e-92	[-1]	Group70	13.2776	143	[ACTB, ACTG1, ACTR2, ARPC3, CACNB3, CAP1, CLTC, CSNK2B, CTCF, DNM2, EIF4A3, EIF4G1, ELOB, ETF1, GRB2, GSPT1, H2AFX, H2AFZ, H3F3A, HDAC3, HIST1H2BC, HIST1H2BJ, HIST1H2BL, HIST2H2AC, HIST2H2BE, HIST2H3D, KRT8, MED10, MED11, MED17, MED18, MED20, MED21, MED26, MED28, MED29, MED30, MED6, MED7, MED8, MED9, NCBP1, NCBP2, PABPC1, PFN1, POLR2A, POLR2C, POLR2E, POLR2F, POLR2G, POLR2H, POLR2K, POLR2L, PSMA1…
R-HSA:72165	mRNA Splicing - Minor Pathway	REACTOME_Pathways_27.02.2019	4.4107e-29	6.03996e-28	4.51459e-69	6.77189e-68	[-1]	Group49	75	39	[DDX23, EFTUD2, GTF2F2, LSM2, NCBP1, NCBP2, PDCD7, POLR2A, POLR2C, POLR2E, POLR2F, POLR2G, POLR2H, POLR2K, POLR2L, PRPF6, PRPF8, RNPC3, SF3B2, SF3B3, SF3B4, SF3B5, SNRNP200, SNRNP25, SNRNP35, SNRNP40, SNRNP48, SNRPD1, SNRPD2, SNRPD3, SNRPF, SNU13, SRSF1, SRSF2, SRSF6, TXNL4A, YBX1, ZCRB1, ZMAT5]
R-HSA:72172	mRNA Splicing	REACTOME_Pathways_27.02.2019	4.23709e-64	4.06155e-62	4.51459e-69	6.77189e-68	[-1]	Group49	58.6387	112	[BCAS2, BUD31, CCAR1, CLP1, CPSF1, CPSF2, CPSF3, CPSF4, CRNKL1, CSTF1, CSTF3, CWC25, DDX23, DDX46, DDX5, DHX15, DHX16, DHX9, DNAJC8, EFTUD2, EIF4A3, FIP1L1, GTF2F2, HNRNPC, HNRNPH1, HNRNPK, HNRNPL, HNRNPR, HNRNPU, ISY1, LSM2, LSM5, LSM6, LSM7, MTREX, NCBP1, NCBP2, NUDT21, PABPN1, PCBP2, PCF11, PDCD7, PHF5A, PLRG1, POLR2A, POLR2C, POLR2E, POLR2F, POLR2G, POLR2H, POLR2K, POLR2L, PPIL1, PPIL4, PPWD1…
R-HSA:8851708	Signaling by FGFR2 IIIa TM	REACTOME_Pathways_27.02.2019	2.73057e-07	6.66258e-07	4.51459e-69	6.77189e-68	[-1]	Group49	57.8947	11	[GTF2F2, NCBP1, NCBP2, POLR2A, POLR2C, POLR2E, POLR2F, POLR2G, POLR2H, POLR2K, POLR2L]
R-HSA:72163	mRNA Splicing - Major Pathway	REACTOME_Pathways_27.02.2019	9.09051e-59	6.09973e-57	4.51459e-69	6.77189e-68	[-1]	Group49	57.377	105	[BCAS2, BUD31, CCAR1, CLP1, CPSF1, CPSF2, CPSF3, CPSF4, CRNKL1, CSTF1, CSTF3, CWC25, DDX23, DDX46, DDX5, DHX15, DHX16, DHX9, DNAJC8, EFTUD2, EIF4A3, FIP1L1, GTF2F2, HNRNPC, HNRNPH1, HNRNPK, HNRNPL, HNRNPR, HNRNPU, ISY1, LSM2, LSM5, LSM6, LSM7, MTREX, NCBP1, NCBP2, NUDT21, PABPN1, PCBP2, PCF11, PHF5A, PLRG1, POLR2A, POLR2C, POLR2E, POLR2F, POLR2G, POLR2H, POLR2K, POLR2L, PPIL1, PPIL4, PPWD1, PRPF1…
R-HSA:72203	Processing of Capped Intron-Containing Pre-mRNA	REACTOME_Pathways_27.02.2019	2.08533e-77	4.66419e-75	4.51459e-69	6.77189e-68	[-1]	Group49	56.9672	139	[BCAS2, BUD31, CCAR1, CLP1, CPSF1, CPSF2, CPSF3, CPSF4, CRNKL1, CSTF1, CSTF3, CWC25, DDX23, DDX46, DDX5, DHX15, DHX16, DHX9, DNAJC8, EFTUD2, EIF4A3, FIP1L1, GLE1, GTF2F2, HNRNPC, HNRNPH1, HNRNPK, HNRNPL, HNRNPR, HNRNPU, ISY1, LSM2, LSM5, LSM6, LSM7, METTL14, METTL3, MTREX, NCBP1, NCBP2, NDC1, NUDT21, NUP133, NUP153, NUP155, NUP160, NUP205, NUP214, NUP35, NUP43, NUP62, NUP85, NUP88, NUP98, NXF1, P…
R-HSA:6803529	FGFR2 alternative splicing	REACTOME_Pathways_27.02.2019	2.19236e-07	5.38854e-07	4.51459e-69	6.77189e-68	[-1]	Group49	50	13	[GTF2F2, HNRNPH1, NCBP1, NCBP2, POLR2A, POLR2C, POLR2E, POLR2F, POLR2G, POLR2H, POLR2K, POLR2L, PTBP1]
R-HSA:1839126	FGFR2 mutant receptor activation	REACTOME_Pathways_27.02.2019	0.000192193	0.000372722	4.51459e-69	6.77189e-68	[-1]	Group49	33.3333	11	[GTF2F2, NCBP1, NCBP2, POLR2A, POLR2C, POLR2E, POLR2F, POLR2G, POLR2H, POLR2K, POLR2L]
R-HSA:5655253	Signaling by FGFR2 in disease	REACTOME_Pathways_27.02.2019	0.000634608	0.00116984	4.51459e-69	6.77189e-68	[-1]	Group49	27.907	12	[GRB2, GTF2F2, NCBP1, NCBP2, POLR2A, POLR2C, POLR2E, POLR2F, POLR2G, POLR2H, POLR2K, POLR2L]
R-HSA:6790901	rRNA modification in the nucleus and cytosol	REACTOME_Pathways_27.02.2019	8.68083e-24	8.09005e-23	2.72513e-65	3.40642e-64	[-1]	Group41	60.9375	39	[BMS1, BUD23, DDX47, DDX49, DHX37, DIMT1, GAR1, HEATR1, IMP4, KRR1, MPHOSPH10, NAT10, NHP2, NOL6, NOP10, NOP14, NOP2, NOP56, NOP58, PDCD11, RCL1, RPS14, RPS6, RPS7, RRP7A, RRP9, SNU13, TBL3, TRMT112, UTP11, UTP15, UTP20, UTP3, UTP4, UTP6, WDR3, WDR43, WDR46, WDR75]
R-HSA:8868773	rRNA processing in the nucleus and cytosol	REACTOME_Pathways_27.02.2019	1.10817e-66	1.48717e-64	2.72513e-65	3.40642e-64	[-1]	Group41	58.8832	116	[BMS1, BOP1, BUD23, BYSL, C1D, DDX21, DDX47, DDX49, DHX37, DIMT1, DIS3, EBNA1BP2, EXOSC1, EXOSC10, EXOSC2, EXOSC3, EXOSC4, EXOSC5, EXOSC6, EXOSC7, EXOSC8, FTSJ3, GAR1, GNL3, HEATR1, IMP4, ISG20L2, KRR1, LTV1, MPHOSPH10, MTREX, NAT10, NCL, NHP2, NIP7, NOB1, NOL12, NOL6, NOL9, NOP10, NOP14, NOP2, NOP56, NOP58, PDCD11, RBM28, RCL1, RIOK2, RPL10A, RPL12, RPL13, RPL13A, RPL14, RPL15, RPL18A, RPL19, RP…
R-HSA:72312	rRNA processing	REACTOME_Pathways_27.02.2019	4.62452e-69	7.75763e-67	2.72513e-65	3.40642e-64	[-1]	Group41	58.4541	121	[BMS1, BOP1, BUD23, BYSL, C1D, DDX21, DDX47, DDX49, DHX37, DIMT1, DIS3, EBNA1BP2, ELAC2, EXOSC1, EXOSC10, EXOSC2, EXOSC3, EXOSC4, EXOSC5, EXOSC6, EXOSC7, EXOSC8, FTSJ3, GAR1, GNL3, HEATR1, IMP4, ISG20L2, KIAA0391, KRR1, LTV1, MPHOSPH10, MRM2, MTREX, NAT10, NCL, NHP2, NIP7, NOB1, NOL12, NOL6, NOL9, NOP10, NOP14, NOP2, NOP56, NOP58, NSUN4, PDCD11, RBM28, RCL1, RIOK2, RPL10A, RPL12, RPL13, RPL13A, R…
R-HSA:6791226	Major pathway of rRNA processing in the nucleolus and cytosol	REACTOME_Pathways_27.02.2019	5.34846e-62	4.48602e-60	2.72513e-65	3.40642e-64	[-1]	Group41	58.2888	109	[BMS1, BOP1, BUD23, BYSL, C1D, DDX21, DDX47, DDX49, DHX37, DIS3, EBNA1BP2, EXOSC1, EXOSC10, EXOSC2, EXOSC3, EXOSC4, EXOSC5, EXOSC6, EXOSC7, EXOSC8, FTSJ3, GNL3, HEATR1, IMP4, ISG20L2, KRR1, LTV1, MPHOSPH10, MTREX, NCL, NIP7, NOB1, NOL12, NOL6, NOL9, NOP14, NOP56, NOP58, PDCD11, RBM28, RCL1, RIOK2, RPL10A, RPL12, RPL13, RPL13A, RPL14, RPL15, RPL18A, RPL19, RPL23, RPL24, RPL26, RPL27A, RPL28, RPL29…
KEGG:03008	Ribosome biogenesis in eukaryotes	KEGG_27.02.2019	1.12353e-15	5.05964e-15	2.72513e-65	3.40642e-64	[-1]	Group41	39.0476	41	[BMS1, CSNK2B, EIF6, GAR1, GNL2, GNL3, GTPBP4, HEATR1, IMP4, MDN1, MPHOSPH10, NAT10, NHP2, NMD3, NOB1, NOL6, NOP10, NOP56, NOP58, NVL, NXF1, POP1, POP4, POP7, RBM28, RCL1, RIOK2, RPP40, RRP7A, SBDS, SNU13, SPATA5, TBL3, UTP15, UTP4, UTP6, WDR3, WDR43, WDR75, XPO1, XRN2]
R-HSA:72766	Translation	REACTOME_Pathways_27.02.2019	2.01659e-96	6.76567e-94	5.24606e-55	5.62077e-54	[-1]	Group66	58.0756	169	[AARS, AARS2, AURKAIP1, CARS, CHCHD1, DARS, DDOST, EARS2, EEF1B2, EEF1G, EEF2, EIF2B1, EIF2B2, EIF2B3, EIF2B4, EIF2B5, EIF2S1, EIF2S2, EIF3A, EIF3B, EIF3D, EIF3E, EIF3F, EIF3H, EIF3I, EIF3J, EIF3M, EIF4A1, EIF4G1, EIF5, ETF1, FARS2, FARSA, FARSB, GARS, GFM1, GSPT1, HARS, HARS2, IARS, IARS2, KARS, LARS, LARS2, MARS, MARS2, MRPL10, MRPL12, MRPL13, MRPL14, MRPL16, MRPL17, MRPL18, MRPL21, MRPL27, MRP…
R-HSA:5389840	Mitochondrial translation elongation	REACTOME_Pathways_27.02.2019	1.8539e-28	2.39224e-27	5.24606e-55	5.62077e-54	[-1]	Group66	57.4713	50	[AURKAIP1, CHCHD1, GFM1, MRPL10, MRPL12, MRPL13, MRPL14, MRPL16, MRPL17, MRPL18, MRPL21, MRPL27, MRPL28, MRPL3, MRPL34, MRPL37, MRPL39, MRPL4, MRPL40, MRPL41, MRPL43, MRPL44, MRPL46, MRPL49, MRPL50, MRPL51, MRPL53, MRPL55, MRPL9, MRPS10, MRPS12, MRPS14, MRPS16, MRPS18A, MRPS18B, MRPS2, MRPS21, MRPS22, MRPS23, MRPS24, MRPS25, MRPS26, MRPS28, MRPS34, MRPS35, MRPS5, MRPS6, MRPS7, MRPS9, TSFM]
R-HSA:5368286	Mitochondrial translation initiation	REACTOME_Pathways_27.02.2019	2.83641e-26	3.021e-25	5.24606e-55	5.62077e-54	[-1]	Group66	55.1724	48	[AURKAIP1, CHCHD1, MRPL10, MRPL12, MRPL13, MRPL14, MRPL16, MRPL17, MRPL18, MRPL21, MRPL27, MRPL28, MRPL3, MRPL34, MRPL37, MRPL39, MRPL4, MRPL40, MRPL41, MRPL43, MRPL44, MRPL46, MRPL49, MRPL50, MRPL51, MRPL53, MRPL55, MRPL9, MRPS10, MRPS12, MRPS14, MRPS16, MRPS18A, MRPS18B, MRPS2, MRPS21, MRPS22, MRPS23, MRPS24, MRPS25, MRPS26, MRPS28, MRPS34, MRPS35, MRPS5, MRPS6, MRPS7, MRPS9]
R-HSA:5419276	Mitochondrial translation termination	REACTOME_Pathways_27.02.2019	2.83641e-26	3.021e-25	5.24606e-55	5.62077e-54	[-1]	Group66	55.1724	48	[AURKAIP1, CHCHD1, MRPL10, MRPL12, MRPL13, MRPL14, MRPL16, MRPL17, MRPL18, MRPL21, MRPL27, MRPL28, MRPL3, MRPL34, MRPL37, MRPL39, MRPL4, MRPL40, MRPL41, MRPL43, MRPL44, MRPL46, MRPL49, MRPL50, MRPL51, MRPL53, MRPL55, MRPL9, MRPS10, MRPS12, MRPS14, MRPS16, MRPS18A, MRPS18B, MRPS2, MRPS21, MRPS22, MRPS23, MRPS24, MRPS25, MRPS26, MRPS28, MRPS34, MRPS35, MRPS5, MRPS6, MRPS7, MRPS9]
R-HSA:975956	Nonsense Mediated Decay (NMD) independent of the Exon Junction Complex (EJC)	REACTOME_Pathways_27.02.2019	3.87294e-28	4.81248e-27	5.24606e-55	5.62077e-54	[-1]	Group66	54.7368	52	[EIF4G1, ETF1, GSPT1, NCBP1, NCBP2, PABPC1, RPL10A, RPL12, RPL13, RPL13A, RPL14, RPL15, RPL18A, RPL19, RPL23, RPL24, RPL26, RPL27A, RPL28, RPL29, RPL3, RPL31, RPL35, RPL36, RPL36AL, RPL37, RPL37A, RPL38, RPL4, RPL7, RPL9, RPLP0, RPLP1, RPS11, RPS12, RPS13, RPS14, RPS15A, RPS16, RPS17, RPS18, RPS19, RPS21, RPS23, RPS24, RPS25, RPS28, RPS6, RPS7, RPS8, RPSA, UPF1]
R-HSA:72613	Eukaryotic Translation Initiation	REACTOME_Pathways_27.02.2019	7.94075e-35	1.97342e-33	5.24606e-55	5.62077e-54	[-1]	Group66	54.6218	65	[EIF2B1, EIF2B2, EIF2B3, EIF2B4, EIF2B5, EIF2S1, EIF2S2, EIF3A, EIF3B, EIF3D, EIF3E, EIF3F, EIF3H, EIF3I, EIF3J, EIF3M, EIF4A1, EIF4G1, EIF5, PABPC1, RPL10A, RPL12, RPL13, RPL13A, RPL14, RPL15, RPL18A, RPL19, RPL23, RPL24, RPL26, RPL27A, RPL28, RPL29, RPL3, RPL31, RPL35, RPL36, RPL36AL, RPL37, RPL37A, RPL38, RPL4, RPL7, RPL9, RPLP0, RPLP1, RPS11, RPS12, RPS13, RPS14, RPS15A, RPS16, RPS17, RPS18, …
R-HSA:72737	Cap-dependent Translation Initiation	REACTOME_Pathways_27.02.2019	7.94075e-35	1.97342e-33	5.24606e-55	5.62077e-54	[-1]	Group66	54.6218	65	[EIF2B1, EIF2B2, EIF2B3, EIF2B4, EIF2B5, EIF2S1, EIF2S2, EIF3A, EIF3B, EIF3D, EIF3E, EIF3F, EIF3H, EIF3I, EIF3J, EIF3M, EIF4A1, EIF4G1, EIF5, PABPC1, RPL10A, RPL12, RPL13, RPL13A, RPL14, RPL15, RPL18A, RPL19, RPL23, RPL24, RPL26, RPL27A, RPL28, RPL29, RPL3, RPL31, RPL35, RPL36, RPL36AL, RPL37, RPL37A, RPL38, RPL4, RPL7, RPL9, RPLP0, RPLP1, RPS11, RPS12, RPS13, RPS14, RPS15A, RPS16, RPS17, RPS18, …
R-HSA:5368287	Mitochondrial translation	REACTOME_Pathways_27.02.2019	1.29565e-26	1.40223e-25	5.24606e-55	5.62077e-54	[-1]	Group66	53.7634	50	[AURKAIP1, CHCHD1, GFM1, MRPL10, MRPL12, MRPL13, MRPL14, MRPL16, MRPL17, MRPL18, MRPL21, MRPL27, MRPL28, MRPL3, MRPL34, MRPL37, MRPL39, MRPL4, MRPL40, MRPL41, MRPL43, MRPL44, MRPL46, MRPL49, MRPL50, MRPL51, MRPL53, MRPL55, MRPL9, MRPS10, MRPS12, MRPS14, MRPS16, MRPS18A, MRPS18B, MRPS2, MRPS21, MRPS22, MRPS23, MRPS24, MRPS25, MRPS26, MRPS28, MRPS34, MRPS35, MRPS5, MRPS6, MRPS7, MRPS9, TSFM]
R-HSA:1799339	SRP-dependent cotranslational protein targeting to membrane	REACTOME_Pathways_27.02.2019	1.35831e-31	2.60407e-30	5.24606e-55	5.62077e-54	[-1]	Group66	53.5714	60	[DDOST, RPL10A, RPL12, RPL13, RPL13A, RPL14, RPL15, RPL18A, RPL19, RPL23, RPL24, RPL26, RPL27A, RPL28, RPL29, RPL3, RPL31, RPL35, RPL36, RPL36AL, RPL37, RPL37A, RPL38, RPL4, RPL7, RPL9, RPLP0, RPLP1, RPN1, RPN2, RPS11, RPS12, RPS13, RPS14, RPS15A, RPS16, RPS17, RPS18, RPS19, RPS21, RPS23, RPS24, RPS25, RPS28, RPS6, RPS7, RPS8, RPSA, SEC61A1, SEC61B, SEC61G, SPCS2, SPCS3, SRP14, SRP19, SRP54, SRP7…
R-HSA:72689	Formation of a pool of free 40S subunits	REACTOME_Pathways_27.02.2019	1.73332e-28	2.28051e-27	5.24606e-55	5.62077e-54	[-1]	Group66	53.4653	54	[EIF3A, EIF3B, EIF3D, EIF3E, EIF3F, EIF3H, EIF3I, EIF3J, EIF3M, RPL10A, RPL12, RPL13, RPL13A, RPL14, RPL15, RPL18A, RPL19, RPL23, RPL24, RPL26, RPL27A, RPL28, RPL29, RPL3, RPL31, RPL35, RPL36, RPL36AL, RPL37, RPL37A, RPL38, RPL4, RPL7, RPL9, RPLP0, RPLP1, RPS11, RPS12, RPS13, RPS14, RPS15A, RPS16, RPS17, RPS18, RPS19, RPS21, RPS23, RPS24, RPS25, RPS28, RPS6, RPS7, RPS8, RPSA]
R-HSA:156827	L13a-mediated translational silencing of Ceruloplasmin expression	REACTOME_Pathways_27.02.2019	7.76978e-31	1.30338e-29	5.24606e-55	5.62077e-54	[-1]	Group66	53.1532	59	[EIF2S1, EIF2S2, EIF3A, EIF3B, EIF3D, EIF3E, EIF3F, EIF3H, EIF3I, EIF3J, EIF3M, EIF4A1, EIF4G1, PABPC1, RPL10A, RPL12, RPL13, RPL13A, RPL14, RPL15, RPL18A, RPL19, RPL23, RPL24, RPL26, RPL27A, RPL28, RPL29, RPL3, RPL31, RPL35, RPL36, RPL36AL, RPL37, RPL37A, RPL38, RPL4, RPL7, RPL9, RPLP0, RPLP1, RPS11, RPS12, RPS13, RPS14, RPS15A, RPS16, RPS17, RPS18, RPS19, RPS21, RPS23, RPS24, RPS25, RPS28, RPS6…
R-HSA:72764	Eukaryotic Translation Termination	REACTOME_Pathways_27.02.2019	1.41666e-25	1.46243e-24	5.24606e-55	5.62077e-54	[-1]	Group66	52.6882	49	[ETF1, GSPT1, N6AMT1, RPL10A, RPL12, RPL13, RPL13A, RPL14, RPL15, RPL18A, RPL19, RPL23, RPL24, RPL26, RPL27A, RPL28, RPL29, RPL3, RPL31, RPL35, RPL36, RPL36AL, RPL37, RPL37A, RPL38, RPL4, RPL7, RPL9, RPLP0, RPLP1, RPS11, RPS12, RPS13, RPS14, RPS15A, RPS16, RPS17, RPS18, RPS19, RPS21, RPS23, RPS24, RPS25, RPS28, RPS6, RPS7, RPS8, RPSA, TRMT112]
R-HSA:72706	GTP hydrolysis and joining of the 60S ribosomal subunit	REACTOME_Pathways_27.02.2019	1.49071e-30	2.38158e-29	5.24606e-55	5.62077e-54	[-1]	Group66	52.6786	59	[EIF2S1, EIF2S2, EIF3A, EIF3B, EIF3D, EIF3E, EIF3F, EIF3H, EIF3I, EIF3J, EIF3M, EIF4A1, EIF4G1, EIF5, RPL10A, RPL12, RPL13, RPL13A, RPL14, RPL15, RPL18A, RPL19, RPL23, RPL24, RPL26, RPL27A, RPL28, RPL29, RPL3, RPL31, RPL35, RPL36, RPL36AL, RPL37, RPL37A, RPL38, RPL4, RPL7, RPL9, RPLP0, RPLP1, RPS11, RPS12, RPS13, RPS14, RPS15A, RPS16, RPS17, RPS18, RPS19, RPS21, RPS23, RPS24, RPS25, RPS28, RPS6, …
R-HSA:156842	Eukaryotic Translation Elongation	REACTOME_Pathways_27.02.2019	1.48306e-24	1.46344e-23	5.24606e-55	5.62077e-54	[-1]	Group66	51.6129	48	[EEF1B2, EEF1G, EEF2, RPL10A, RPL12, RPL13, RPL13A, RPL14, RPL15, RPL18A, RPL19, RPL23, RPL24, RPL26, RPL27A, RPL28, RPL29, RPL3, RPL31, RPL35, RPL36, RPL36AL, RPL37, RPL37A, RPL38, RPL4, RPL7, RPL9, RPLP0, RPLP1, RPS11, RPS12, RPS13, RPS14, RPS15A, RPS16, RPS17, RPS18, RPS19, RPS21, RPS23, RPS24, RPS25, RPS28, RPS6, RPS7, RPS8, RPSA]
KEGG:03010	Ribosome	KEGG_27.02.2019	6.91358e-33	1.40576e-31	5.24606e-55	5.62077e-54	[-1]	Group66	47.0588	72	[FAU, MRPL10, MRPL12, MRPL13, MRPL14, MRPL16, MRPL17, MRPL18, MRPL21, MRPL27, MRPL28, MRPL3, MRPL34, MRPL4, MRPL9, MRPS10, MRPS12, MRPS14, MRPS16, MRPS18A, MRPS2, MRPS21, MRPS5, MRPS6, MRPS7, MRPS9, RPL10A, RPL12, RPL13, RPL13A, RPL14, RPL15, RPL18A, RPL19, RPL23, RPL24, RPL26, RPL27A, RPL28, RPL29, RPL3, RPL31, RPL35, RPL36, RPL36AL, RPL37, RPL37A, RPL38, RPL4, RPL7, RPL9, RPLP0, RPLP1, RPS11, R…
R-HSA:2408522	Selenoamino acid metabolism	REACTOME_Pathways_27.02.2019	3.38383e-24	3.24364e-23	5.24606e-55	5.62077e-54	[-1]	Group66	45.7627	54	[DARS, IARS, KARS, LARS, MARS, PSTK, QARS, RPL10A, RPL12, RPL13, RPL13A, RPL14, RPL15, RPL18A, RPL19, RPL23, RPL24, RPL26, RPL27A, RPL28, RPL29, RPL3, RPL31, RPL35, RPL36, RPL36AL, RPL37, RPL37A, RPL38, RPL4, RPL7, RPL9, RPLP0, RPLP1, RPS11, RPS12, RPS13, RPS14, RPS15A, RPS16, RPS17, RPS18, RPS19, RPS21, RPS23, RPS24, RPS25, RPS28, RPS6, RPS7, RPS8, RPSA, SARS, SEPHS2]
R-HSA:392499	Metabolism of proteins	REACTOME_Pathways_27.02.2019	1.58005e-54	8.83512e-53	5.24606e-55	5.62077e-54	[-1]	Group66	19.9509	406	[AARS, AARS2, ACTB, ACTL6A, ACTR10, ACTR1A, ACTR8, ALG1, ALG14, ALG2, ARCN1, ARF4, ARL2, ASNA1, ATF4, AURKAIP1, AURKB, B4GALT3, BAP1, BARD1, BIRC5, BRCA1, CAPZB, CARS, CCDC59, CCNA2, CCP110, CCT2, CCT3, CCT4, CCT6A, CCT8, CDC20, CDC73, CDCA8, CHCHD1, COG1, COG2, COG3, COG4, COG8, COPB2, COPE, COPS2, COPS3, COPS4, COPS5, COPS6, COPS8, COPZ1, CSNK2B, CTR9, CUL1, CUL3, CXXC1, DAD1, DARS, DCTN2, DCTN…
R-HSA:72766	Translation	REACTOME_Pathways_27.02.2019	2.01659e-96	6.76567e-94	1.58005e-54	1.4813e-53	[-1]	Group29	58.0756	169	[AARS, AARS2, AURKAIP1, CARS, CHCHD1, DARS, DDOST, EARS2, EEF1B2, EEF1G, EEF2, EIF2B1, EIF2B2, EIF2B3, EIF2B4, EIF2B5, EIF2S1, EIF2S2, EIF3A, EIF3B, EIF3D, EIF3E, EIF3F, EIF3H, EIF3I, EIF3J, EIF3M, EIF4A1, EIF4G1, EIF5, ETF1, FARS2, FARSA, FARSB, GARS, GFM1, GSPT1, HARS, HARS2, IARS, IARS2, KARS, LARS, LARS2, MARS, MARS2, MRPL10, MRPL12, MRPL13, MRPL14, MRPL16, MRPL17, MRPL18, MRPL21, MRPL27, MRP…
R-HSA:392499	Metabolism of proteins	REACTOME_Pathways_27.02.2019	1.58005e-54	8.83512e-53	1.58005e-54	1.4813e-53	[-1]	Group29	19.9509	406	[AARS, AARS2, ACTB, ACTL6A, ACTR10, ACTR1A, ACTR8, ALG1, ALG14, ALG2, ARCN1, ARF4, ARL2, ASNA1, ATF4, AURKAIP1, AURKB, B4GALT3, BAP1, BARD1, BIRC5, BRCA1, CAPZB, CARS, CCDC59, CCNA2, CCP110, CCT2, CCT3, CCT4, CCT6A, CCT8, CDC20, CDC73, CDCA8, CHCHD1, COG1, COG2, COG3, COG4, COG8, COPB2, COPE, COPS2, COPS3, COPS4, COPS5, COPS6, COPS8, COPZ1, CSNK2B, CTR9, CUL1, CUL3, CXXC1, DAD1, DARS, DCTN2, DCTN…
R-HSA:597592	Post-translational protein modification	REACTOME_Pathways_27.02.2019	3.45117e-07	8.30012e-07	1.58005e-54	1.4813e-53	[-1]	Group29	13.7159	196	[ACTB, ACTL6A, ACTR10, ACTR1A, ACTR8, ALG1, ALG14, ALG2, ARCN1, ARF4, AURKB, B4GALT3, BAP1, BARD1, BIRC5, BRCA1, CAPZB, CCNA2, CCP110, CDC20, CDC73, CDCA8, COG1, COG2, COG3, COG4, COG8, COPB2, COPE, COPS2, COPS3, COPS4, COPS5, COPS6, COPS8, COPZ1, CTR9, CUL1, CUL3, DAD1, DCTN2, DCTN3, DCTN4, DCTN5, DCTN6, DDB1, DDOST, DDX5, DHDDS, DHPS, DOHH, DOLK, DPAGT1, DPH6, DPM2, DTL, DYNC1H1, DYNC1I2, EEF2,…
R-HSA:2262752	Cellular responses to stress	REACTOME_Pathways_27.02.2019	3.25478e-18	1.94996e-17	2.87069e-54	2.39224e-53	[-1]	Group40	23.8979	103	[ACD, ACTR10, ACTR1A, ANAPC1, ANAPC10, ANAPC11, ANAPC15, ANAPC4, ANAPC5, CAPZB, CCNA2, CDC16, CDC23, CDC26, CYCS, DCTN2, DCTN3, DCTN4, DCTN5, DCTN6, DYNC1H1, DYNC1I2, EGLN2, ELOB, EP400, H2AFX, H2AFZ, H3F3A, HIST1H2BC, HIST1H2BJ, HIST1H2BL, HIST2H2AC, HIST2H2BE, HIST2H3D, HMGA1, HSF1, HSPA9, MLST8, MTOR, NDC1, NUP133, NUP153, NUP155, NUP160, NUP205, NUP214, NUP35, NUP43, NUP62, NUP85, NUP88, NUP9…
R-HSA:5688426	Deubiquitination	REACTOME_Pathways_27.02.2019	1.0314e-09	3.13154e-09	2.87069e-54	2.39224e-53	[-1]	Group40	21.5488	64	[ACTB, ACTL6A, ACTR8, BAP1, BARD1, BRCA1, CCNA2, CCP110, CDC20, HGS, HIST1H2BC, HIST1H2BJ, HIST1H2BL, HIST2H2AC, HIST2H2BE, INO80, MYC, NEDD8, PSMA1, PSMA2, PSMA3, PSMA4, PSMA5, PSMA6, PSMA7, PSMB1, PSMB2, PSMB3, PSMB4, PSMB5, PSMB6, PSMB7, PSMC1, PSMC2, PSMC3, PSMC4, PSMC5, PSMC6, PSMD11, PSMD12, PSMD13, PSMD14, PSMD2, PSMD3, PSMD4, PSMD6, PSMD7, PSMD8, PSME1, RUVBL1, SEM1, TADA3, TAF10, TOMM20,…
R-HSA:392499	Metabolism of proteins	REACTOME_Pathways_27.02.2019	1.58005e-54	8.83512e-53	2.87069e-54	2.39224e-53	[-1]	Group40	19.9509	406	[AARS, AARS2, ACTB, ACTL6A, ACTR10, ACTR1A, ACTR8, ALG1, ALG14, ALG2, ARCN1, ARF4, ARL2, ASNA1, ATF4, AURKAIP1, AURKB, B4GALT3, BAP1, BARD1, BIRC5, BRCA1, CAPZB, CARS, CCDC59, CCNA2, CCP110, CCT2, CCT3, CCT4, CCT6A, CCT8, CDC20, CDC73, CDCA8, CHCHD1, COG1, COG2, COG3, COG4, COG8, COPB2, COPE, COPS2, COPS3, COPS4, COPS5, COPS6, COPS8, COPZ1, CSNK2B, CTR9, CUL1, CUL3, CXXC1, DAD1, DARS, DCTN2, DCTN…
R-HSA:446203	Asparagine N-linked glycosylation	REACTOME_Pathways_27.02.2019	1.21452e-06	2.7909e-06	2.87069e-54	2.39224e-53	[-1]	Group40	18.75	57	[ACTR10, ACTR1A, ALG1, ALG14, ALG2, ARCN1, ARF4, B4GALT3, CAPZB, COG1, COG2, COG3, COG4, COG8, COPB2, COPE, COPZ1, DAD1, DCTN2, DCTN3, DCTN4, DCTN5, DCTN6, DDOST, DHDDS, DOLK, DPAGT1, DPM2, DYNC1H1, DYNC1I2, GMPPB, GNPNAT1, GOSR2, MVD, NAPA, NSF, NUS1, PPP6C, PREB, PSMC1, RFT1, RNF103, RPN1, RPN2, SEC13, SEC16A, SRD5A3, STX5, TRAPPC1, TRAPPC3, TRAPPC4, TRAPPC5, TUBA1C, TUBB8, UBC, VCP, YKT6]
R-HSA:597592	Post-translational protein modification	REACTOME_Pathways_27.02.2019	3.45117e-07	8.30012e-07	2.87069e-54	2.39224e-53	[-1]	Group40	13.7159	196	[ACTB, ACTL6A, ACTR10, ACTR1A, ACTR8, ALG1, ALG14, ALG2, ARCN1, ARF4, AURKB, B4GALT3, BAP1, BARD1, BIRC5, BRCA1, CAPZB, CCNA2, CCP110, CDC20, CDC73, CDCA8, COG1, COG2, COG3, COG4, COG8, COPB2, COPE, COPS2, COPS3, COPS4, COPS5, COPS6, COPS8, COPZ1, CTR9, CUL1, CUL3, DAD1, DCTN2, DCTN3, DCTN4, DCTN5, DCTN6, DDB1, DDOST, DDX5, DHDDS, DHPS, DOHH, DOLK, DPAGT1, DPH6, DPM2, DTL, DYNC1H1, DYNC1I2, EEF2,…
R-HSA:69239	Synthesis of DNA	REACTOME_Pathways_27.02.2019	2.85617e-46	1.27766e-44	1.0148e-52	7.61097e-52	[-1]	Group68	63.0252	75	[ANAPC1, ANAPC10, ANAPC11, ANAPC15, ANAPC4, ANAPC5, CCNA2, CDC16, CDC23, CDC26, CDC45, CDC6, CDT1, CUL1, FEN1, GINS1, GINS2, GINS3, MCM2, MCM3, MCM4, MCM5, MCM6, MCM7, ORC1, ORC3, ORC4, ORC5, PCNA, POLA2, POLD1, POLD2, POLD3, POLE2, PRIM1, PSMA1, PSMA2, PSMA3, PSMA4, PSMA5, PSMA6, PSMA7, PSMB1, PSMB2, PSMB3, PSMB4, PSMB5, PSMB6, PSMB7, PSMC1, PSMC2, PSMC3, PSMC4, PSMC5, PSMC6, PSMD11, PSMD12, PSM…
R-HSA:69306	DNA Replication	REACTOME_Pathways_27.02.2019	1.64756e-44	6.14175e-43	1.0148e-52	7.61097e-52	[-1]	Group68	59.8425	76	[ANAPC1, ANAPC10, ANAPC11, ANAPC15, ANAPC4, ANAPC5, CCNA2, CDC16, CDC23, CDC26, CDC45, CDC6, CDC7, CDT1, CUL1, FEN1, GINS1, GINS2, GINS3, MCM2, MCM3, MCM4, MCM5, MCM6, MCM7, ORC1, ORC3, ORC4, ORC5, PCNA, POLA2, POLD1, POLD2, POLD3, POLE2, PRIM1, PSMA1, PSMA2, PSMA3, PSMA4, PSMA5, PSMA6, PSMA7, PSMB1, PSMB2, PSMB3, PSMB4, PSMB5, PSMB6, PSMB7, PSMC1, PSMC2, PSMC3, PSMC4, PSMC5, PSMC6, PSMD11, PSMD1…
R-HSA:69242	S Phase	REACTOME_Pathways_27.02.2019	1.17312e-41	4.14296e-40	1.0148e-52	7.61097e-52	[-1]	Group68	51.5528	83	[ANAPC1, ANAPC10, ANAPC11, ANAPC15, ANAPC4, ANAPC5, CCNA2, CCND1, CCNH, CDC16, CDC23, CDC26, CDC45, CDC6, CDT1, CUL1, FEN1, GINS1, GINS2, GINS3, MCM2, MCM3, MCM4, MCM5, MCM6, MCM7, MNAT1, MYC, ORC1, ORC3, ORC4, ORC5, PCNA, POLA2, POLD1, POLD2, POLD3, POLE2, PRIM1, PSMA1, PSMA2, PSMA3, PSMA4, PSMA5, PSMA6, PSMA7, PSMB1, PSMB2, PSMB3, PSMB4, PSMB5, PSMB6, PSMB7, PSMC1, PSMC2, PSMC3, PSMC4, PSMC5, P…
R-HSA:69206	G1/S Transition	REACTOME_Pathways_27.02.2019	1.61058e-31	3.00194e-30	1.0148e-52	7.61097e-52	[-1]	Group68	49.6183	65	[CCNA2, CCND1, CCNH, CDC45, CDC6, CDC7, CDT1, CUL1, MCM2, MCM3, MCM4, MCM5, MCM6, MCM7, MNAT1, MYC, ORC1, ORC3, ORC4, ORC5, PCNA, POLA2, POLE2, PPP2CA, PPP2R1A, PRIM1, PSMA1, PSMA2, PSMA3, PSMA4, PSMA5, PSMA6, PSMA7, PSMB1, PSMB2, PSMB3, PSMB4, PSMB5, PSMB6, PSMB7, PSMC1, PSMC2, PSMC3, PSMC4, PSMC5, PSMC6, PSMD11, PSMD12, PSMD13, PSMD14, PSMD2, PSMD3, PSMD4, PSMD6, PSMD7, PSMD8, PSME1, RBBP4, RPA…
R-HSA:2467813	Separation of Sister Chromatids	REACTOME_Pathways_27.02.2019	2.5062e-39	8.40831e-38	1.0148e-52	7.61097e-52	[-1]	Group68	46.3158	88	[AHCTF1, ANAPC1, ANAPC10, ANAPC11, ANAPC15, ANAPC4, ANAPC5, AURKB, BIRC5, BUB1B, BUB3, CDC16, CDC20, CDC23, CDC26, CDCA8, CENPA, CENPE, CENPK, CKAP5, DSN1, DYNC1H1, DYNC1I2, ESPL1, INCENP, KIF18A, KNL1, MAD2L1, MIS12, NSL1, NUDC, NUF2, NUP133, NUP160, NUP43, NUP85, NUP98, PAFAH1B1, PLK1, PMF1, PPP2CA, PPP2R1A, PSMA1, PSMA2, PSMA3, PSMA4, PSMA5, PSMA6, PSMA7, PSMB1, PSMB2, PSMB3, PSMB4, PSMB5, PSM…
R-HSA:68882	Mitotic Anaphase	REACTOME_Pathways_27.02.2019	1.00036e-38	3.1964e-37	1.0148e-52	7.61097e-52	[-1]	Group68	44.7761	90	[AHCTF1, ANAPC1, ANAPC10, ANAPC11, ANAPC15, ANAPC4, ANAPC5, ANKLE2, AURKB, BANF1, BIRC5, BUB1B, BUB3, CDC16, CDC20, CDC23, CDC26, CDCA8, CENPA, CENPE, CENPK, CKAP5, DSN1, DYNC1H1, DYNC1I2, ESPL1, INCENP, KIF18A, KNL1, MAD2L1, MIS12, NSL1, NUDC, NUF2, NUP133, NUP160, NUP43, NUP85, NUP98, PAFAH1B1, PLK1, PMF1, PPP2CA, PPP2R1A, PSMA1, PSMA2, PSMA3, PSMA4, PSMA5, PSMA6, PSMA7, PSMB1, PSMB2, PSMB3, PS…
R-HSA:2555396	Mitotic Metaphase and Anaphase	REACTOME_Pathways_27.02.2019	1.64056e-38	5.00371e-37	1.0148e-52	7.61097e-52	[-1]	Group68	44.5545	90	[AHCTF1, ANAPC1, ANAPC10, ANAPC11, ANAPC15, ANAPC4, ANAPC5, ANKLE2, AURKB, BANF1, BIRC5, BUB1B, BUB3, CDC16, CDC20, CDC23, CDC26, CDCA8, CENPA, CENPE, CENPK, CKAP5, DSN1, DYNC1H1, DYNC1I2, ESPL1, INCENP, KIF18A, KNL1, MAD2L1, MIS12, NSL1, NUDC, NUF2, NUP133, NUP160, NUP43, NUP85, NUP98, PAFAH1B1, PLK1, PMF1, PPP2CA, PPP2R1A, PSMA1, PSMA2, PSMA3, PSMA4, PSMA5, PSMA6, PSMA7, PSMB1, PSMB2, PSMB3, PS…
R-HSA:453279	Mitotic G1-G1/S phases	REACTOME_Pathways_27.02.2019	2.74421e-28	3.47427e-27	1.0148e-52	7.61097e-52	[-1]	Group68	44.2953	66	[CCNA2, CCND1, CCNH, CDC45, CDC6, CDC7, CDT1, CUL1, MCM2, MCM3, MCM4, MCM5, MCM6, MCM7, MNAT1, MYC, ORC1, ORC3, ORC4, ORC5, PCNA, POLA2, POLE2, PPP2CA, PPP2R1A, PRIM1, PSMA1, PSMA2, PSMA3, PSMA4, PSMA5, PSMA6, PSMA7, PSMB1, PSMB2, PSMB3, PSMB4, PSMB5, PSMB6, PSMB7, PSMC1, PSMC2, PSMC3, PSMC4, PSMC5, PSMC6, PSMD11, PSMD12, PSMD13, PSMD14, PSMD2, PSMD3, PSMD4, PSMD6, PSMD7, PSMD8, PSME1, RBBP4, RPA…
R-HSA:69481	G2/M Checkpoints	REACTOME_Pathways_27.02.2019	8.72419e-29	1.17079e-27	1.0148e-52	7.61097e-52	[-1]	Group68	42.2619	71	[BARD1, BRCA1, CDC45, CDC6, CDC7, CHEK1, H2AFX, HIST1H2BC, HIST1H2BJ, HIST1H2BL, HIST2H2BE, HUS1, MCM2, MCM3, MCM4, MCM5, MCM6, MCM7, ORC1, ORC3, ORC4, ORC5, PKMYT1, PSMA1, PSMA2, PSMA3, PSMA4, PSMA5, PSMA6, PSMA7, PSMB1, PSMB2, PSMB3, PSMB4, PSMB5, PSMB6, PSMB7, PSMC1, PSMC2, PSMC3, PSMC4, PSMC5, PSMC6, PSMD11, PSMD12, PSMD13, PSMD14, PSMD2, PSMD3, PSMD4, PSMD6, PSMD7, PSMD8, PSME1, RAD17, RAD9A…
R-HSA:69620	Cell Cycle Checkpoints	REACTOME_Pathways_27.02.2019	3.19238e-48	1.53006e-46	1.0148e-52	7.61097e-52	[-1]	Group68	41.6382	122	[AHCTF1, ANAPC1, ANAPC10, ANAPC11, ANAPC15, ANAPC4, ANAPC5, AURKB, BARD1, BIRC5, BRCA1, BUB1B, BUB3, CCNA2, CDC16, CDC20, CDC23, CDC26, CDC45, CDC6, CDC7, CDCA8, CENPA, CENPE, CENPK, CHEK1, CKAP5, DSN1, DYNC1H1, DYNC1I2, H2AFX, HIST1H2BC, HIST1H2BJ, HIST1H2BL, HIST2H2BE, HUS1, INCENP, KIF18A, KNL1, MAD2L1, MCM2, MCM3, MCM4, MCM5, MCM6, MCM7, MIS12, NSL1, NUDC, NUF2, NUP133, NUP160, NUP43, NUP85, …
R-HSA:69275	G2/M Transition	REACTOME_Pathways_27.02.2019	8.64958e-28	1.01822e-26	1.0148e-52	7.61097e-52	[-1]	Group68	38.7755	76	[ACTR1A, CCNA2, CCNH, CCP110, CDK11A, CEP192, CKAP5, CUL1, DCTN2, DCTN3, DYNC1H1, DYNC1I2, FGFR1OP, HAUS1, HAUS3, HAUS4, HAUS5, HAUS8, MNAT1, MZT1, NEDD1, PAFAH1B1, PKMYT1, PLK1, PLK4, PPME1, PPP1R12A, PPP2CA, PPP2R1A, PSMA1, PSMA2, PSMA3, PSMA4, PSMA5, PSMA6, PSMA7, PSMB1, PSMB2, PSMB3, PSMB4, PSMB5, PSMB6, PSMB7, PSMC1, PSMC2, PSMC3, PSMC4, PSMC5, PSMC6, PSMD11, PSMD12, PSMD13, PSMD14, PSMD2, P…
R-HSA:453274	Mitotic G2-G2/M phases	REACTOME_Pathways_27.02.2019	1.886e-27	2.10918e-26	1.0148e-52	7.61097e-52	[-1]	Group68	38.3838	76	[ACTR1A, CCNA2, CCNH, CCP110, CDK11A, CEP192, CKAP5, CUL1, DCTN2, DCTN3, DYNC1H1, DYNC1I2, FGFR1OP, HAUS1, HAUS3, HAUS4, HAUS5, HAUS8, MNAT1, MZT1, NEDD1, PAFAH1B1, PKMYT1, PLK1, PLK4, PPME1, PPP1R12A, PPP2CA, PPP2R1A, PSMA1, PSMA2, PSMA3, PSMA4, PSMA5, PSMA6, PSMA7, PSMB1, PSMB2, PSMB3, PSMB4, PSMB5, PSMB6, PSMB7, PSMC1, PSMC2, PSMC3, PSMC4, PSMC5, PSMC6, PSMD11, PSMD12, PSMD13, PSMD14, PSMD2, P…
R-HSA:68886	M Phase	REACTOME_Pathways_27.02.2019	1.1236e-44	4.43492e-43	1.0148e-52	7.61097e-52	[-1]	Group68	35.1899	139	[ACTR1A, AHCTF1, ANAPC1, ANAPC10, ANAPC11, ANAPC15, ANAPC4, ANAPC5, ANKLE2, AURKB, BANF1, BIRC5, BUB1B, BUB3, CCP110, CDC16, CDC20, CDC23, CDC26, CDCA8, CENPA, CENPE, CENPK, CEP192, CKAP5, CSNK2B, DCTN2, DCTN3, DSN1, DYNC1H1, DYNC1I2, ESPL1, FGFR1OP, H2AFX, H2AFZ, H3F3A, HAUS1, HAUS3, HAUS4, HAUS5, HAUS8, HIST1H2BC, HIST1H2BJ, HIST1H2BL, HIST2H2AC, HIST2H2BE, HIST2H3D, INCENP, KIF18A, KNL1, MAD2L…
R-HSA:68877	Mitotic Prometaphase	REACTOME_Pathways_27.02.2019	1.28493e-22	1.07773e-21	1.0148e-52	7.61097e-52	[-1]	Group68	35	70	[ACTR1A, AHCTF1, AURKB, BIRC5, BUB1B, BUB3, CCP110, CDC20, CDCA8, CENPA, CENPE, CENPK, CEP192, CKAP5, CSNK2B, DCTN2, DCTN3, DSN1, DYNC1H1, DYNC1I2, FGFR1OP, HAUS1, HAUS3, HAUS4, HAUS5, HAUS8, INCENP, KIF18A, KNL1, MAD2L1, MIS12, MZT1, NCAPG, NCAPH, NEDD1, NSL1, NUDC, NUF2, NUP133, NUP160, NUP43, NUP85, NUP98, PAFAH1B1, PLK1, PLK4, PMF1, PPP2CA, PPP2R1A, RAD21, RANGAP1, SEC13, SEH1L, SGO1, SKA1, S…
R-HSA:69278	Cell Cycle, Mitotic	REACTOME_Pathways_27.02.2019	7.17418e-59	5.34875e-57	1.0148e-52	7.61097e-52	[-1]	Group68	34.5725	186	[ACTR1A, AHCTF1, ANAPC1, ANAPC10, ANAPC11, ANAPC15, ANAPC4, ANAPC5, ANKLE2, AURKB, BANF1, BIRC5, BUB1B, BUB3, CCNA2, CCND1, CCNH, CCP110, CDC16, CDC20, CDC23, CDC26, CDC45, CDC6, CDC7, CDCA8, CDK11A, CDT1, CENPA, CENPE, CENPK, CEP192, CKAP5, CSNK2B, CUL1, DCTN2, DCTN3, DSN1, DYNC1H1, DYNC1I2, ESPL1, FEN1, FGFR1OP, GINS1, GINS2, GINS3, H2AFX, H2AFZ, H3F3A, HAUS1, HAUS3, HAUS4, HAUS5, HAUS8, HIST1H…
R-HSA:1640170	Cell Cycle	REACTOME_Pathways_27.02.2019	8.12975e-65	9.09177e-63	1.0148e-52	7.61097e-52	[-1]	Group68	33.2815	214	[ACD, ACTR1A, AHCTF1, ANAPC1, ANAPC10, ANAPC11, ANAPC15, ANAPC4, ANAPC5, ANKLE2, AURKB, BANF1, BARD1, BIRC5, BRCA1, BRCA2, BUB1B, BUB3, CCNA2, CCND1, CCNH, CCP110, CDC16, CDC20, CDC23, CDC26, CDC45, CDC6, CDC7, CDCA8, CDK11A, CDT1, CENPA, CENPE, CENPK, CENPW, CEP192, CHEK1, CKAP5, CSNK2B, CUL1, DCTN2, DCTN3, DSN1, DYNC1H1, DYNC1I2, ESPL1, FEN1, FGFR1OP, GINS1, GINS2, GINS3, H2AFX, H2AFZ, H3F3A, H…
R-HSA:2262752	Cellular responses to stress	REACTOME_Pathways_27.02.2019	3.25478e-18	1.94996e-17	1.0148e-52	7.61097e-52	[-1]	Group68	23.8979	103	[ACD, ACTR10, ACTR1A, ANAPC1, ANAPC10, ANAPC11, ANAPC15, ANAPC4, ANAPC5, CAPZB, CCNA2, CDC16, CDC23, CDC26, CYCS, DCTN2, DCTN3, DCTN4, DCTN5, DCTN6, DYNC1H1, DYNC1I2, EGLN2, ELOB, EP400, H2AFX, H2AFZ, H3F3A, HIST1H2BC, HIST1H2BJ, HIST1H2BL, HIST2H2AC, HIST2H2BE, HIST2H3D, HMGA1, HSF1, HSPA9, MLST8, MTOR, NDC1, NUP133, NUP153, NUP155, NUP160, NUP205, NUP214, NUP35, NUP43, NUP62, NUP85, NUP88, NUP9…
R-HSA:8953897	Cellular responses to external stimuli	REACTOME_Pathways_27.02.2019	1.46973e-16	7.1463e-16	1.0148e-52	7.61097e-52	[-1]	Group68	21.8504	111	[ACD, ACTR10, ACTR1A, ANAPC1, ANAPC10, ANAPC11, ANAPC15, ANAPC4, ANAPC5, CAPZB, CCNA2, CDC16, CDC23, CDC26, CHMP2A, CHMP6, CHMP7, CYCS, DCTN2, DCTN3, DCTN4, DCTN5, DCTN6, DYNC1H1, DYNC1I2, EGLN2, ELOB, EP400, H2AFX, H2AFZ, H3F3A, HIST1H2BC, HIST1H2BJ, HIST1H2BL, HIST2H2AC, HIST2H2BE, HIST2H3D, HMGA1, HSF1, HSPA9, LAMTOR2, LAMTOR3, LAMTOR4, MLST8, MTOR, NDC1, NUP133, NUP153, NUP155, NUP160, NUP205…
R-HSA:72165	mRNA Splicing - Minor Pathway	REACTOME_Pathways_27.02.2019	4.4107e-29	6.03996e-28	4.08636e-49	2.78615e-48	[-1]	Group74	75	39	[DDX23, EFTUD2, GTF2F2, LSM2, NCBP1, NCBP2, PDCD7, POLR2A, POLR2C, POLR2E, POLR2F, POLR2G, POLR2H, POLR2K, POLR2L, PRPF6, PRPF8, RNPC3, SF3B2, SF3B3, SF3B4, SF3B5, SNRNP200, SNRNP25, SNRNP35, SNRNP40, SNRNP48, SNRPD1, SNRPD2, SNRPD3, SNRPF, SNU13, SRSF1, SRSF2, SRSF6, TXNL4A, YBX1, ZCRB1, ZMAT5]
R-HSA:76061	RNA Polymerase III Transcription Initiation From Type 1 Promoter	REACTOME_Pathways_27.02.2019	3.28907e-16	1.56523e-15	4.08636e-49	2.78615e-48	[-1]	Group74	75	21	[BDP1, BRF1, CRCP, GTF3A, GTF3C1, GTF3C2, GTF3C5, GTF3C6, POLR1C, POLR2E, POLR2F, POLR2H, POLR2K, POLR2L, POLR3B, POLR3C, POLR3E, POLR3F, POLR3H, POLR3K, TBP]
R-HSA:76066	RNA Polymerase III Transcription Initiation From Type 2 Promoter	REACTOME_Pathways_27.02.2019	2.56193e-15	1.11627e-14	4.08636e-49	2.78615e-48	[-1]	Group74	74.0741	20	[BDP1, BRF1, CRCP, GTF3C1, GTF3C2, GTF3C5, GTF3C6, POLR1C, POLR2E, POLR2F, POLR2H, POLR2K, POLR2L, POLR3B, POLR3C, POLR3E, POLR3F, POLR3H, POLR3K, TBP]
R-HSA:73772	RNA Polymerase I Promoter Escape	REACTOME_Pathways_27.02.2019	1.42057e-16	6.95766e-16	4.08636e-49	2.78615e-48	[-1]	Group74	73.3333	22	[CCNH, ERCC2, ERCC3, GTF2H1, GTF2H3, GTF2H4, MNAT1, POLR1A, POLR1B, POLR1C, POLR1E, POLR2E, POLR2F, POLR2H, POLR2K, POLR2L, TAF1B, TAF1C, TBP, TWISTNB, UBTF, ZNRD1]
R-HSA:72086	mRNA Capping	REACTOME_Pathways_27.02.2019	1.08278e-15	4.90907e-15	4.08636e-49	2.78615e-48	[-1]	Group74	72.4138	21	[CCNH, ERCC2, ERCC3, GTF2F2, GTF2H1, GTF2H3, GTF2H4, MNAT1, NCBP1, NCBP2, POLR2A, POLR2C, POLR2E, POLR2F, POLR2G, POLR2H, POLR2K, POLR2L, RNGTT, RNMT, SUPT5H]
R-HSA:73780	RNA Polymerase III Chain Elongation	REACTOME_Pathways_27.02.2019	3.82904e-10	1.19502e-09	4.08636e-49	2.78615e-48	[-1]	Group74	72.2222	13	[CRCP, POLR1C, POLR2E, POLR2F, POLR2H, POLR2K, POLR2L, POLR3B, POLR3C, POLR3E, POLR3F, POLR3H, POLR3K]
R-HSA:167160	RNA Pol II CTD phosphorylation and interaction with CE during HIV infection	REACTOME_Pathways_27.02.2019	6.03922e-14	2.41209e-13	4.08636e-49	2.78615e-48	[-1]	Group74	70.3704	19	[CCNH, ERCC2, ERCC3, GTF2F2, GTF2H1, GTF2H3, GTF2H4, MNAT1, POLR2A, POLR2C, POLR2E, POLR2F, POLR2G, POLR2H, POLR2K, POLR2L, RNGTT, RNMT, SUPT5H]
R-HSA:77075	RNA Pol II CTD phosphorylation and interaction with CE	REACTOME_Pathways_27.02.2019	6.03922e-14	2.41209e-13	4.08636e-49	2.78615e-48	[-1]	Group74	70.3704	19	[CCNH, ERCC2, ERCC3, GTF2F2, GTF2H1, GTF2H3, GTF2H4, MNAT1, POLR2A, POLR2C, POLR2E, POLR2F, POLR2G, POLR2H, POLR2K, POLR2L, RNGTT, RNMT, SUPT5H]
R-HSA:113418	Formation of the Early Elongation Complex	REACTOME_Pathways_27.02.2019	1.78057e-16	8.53401e-16	4.08636e-49	2.78615e-48	[-1]	Group74	69.697	23	[CCNH, CTDP1, ERCC2, ERCC3, GTF2F2, GTF2H1, GTF2H3, GTF2H4, MNAT1, NCBP1, NCBP2, NELFA, NELFB, NELFE, POLR2A, POLR2C, POLR2E, POLR2F, POLR2G, POLR2H, POLR2K, POLR2L, SUPT5H]
R-HSA:167158	Formation of the HIV-1 Early Elongation Complex	REACTOME_Pathways_27.02.2019	1.78057e-16	8.53401e-16	4.08636e-49	2.78615e-48	[-1]	Group74	69.697	23	[CCNH, CTDP1, ERCC2, ERCC3, GTF2F2, GTF2H1, GTF2H3, GTF2H4, MNAT1, NCBP1, NCBP2, NELFA, NELFB, NELFE, POLR2A, POLR2C, POLR2E, POLR2F, POLR2G, POLR2H, POLR2K, POLR2L, SUPT5H]
R-HSA:167242	Abortive elongation of HIV-1 transcript in the absence of Tat	REACTOME_Pathways_27.02.2019	8.1798e-12	2.87364e-11	4.08636e-49	2.78615e-48	[-1]	Group74	69.5652	16	[CTDP1, GTF2F2, NCBP1, NCBP2, NELFA, NELFB, NELFE, POLR2A, POLR2C, POLR2E, POLR2F, POLR2G, POLR2H, POLR2K, POLR2L, SUPT5H]
R-HSA:76046	RNA Polymerase III Transcription Initiation	REACTOME_Pathways_27.02.2019	9.67541e-18	5.41017e-17	4.08636e-49	2.78615e-48	[-1]	Group74	69.4444	25	[BDP1, BRF1, CRCP, GTF3A, GTF3C1, GTF3C2, GTF3C5, GTF3C6, POLR1C, POLR2E, POLR2F, POLR2H, POLR2K, POLR2L, POLR3B, POLR3C, POLR3E, POLR3F, POLR3H, POLR3K, SNAPC1, SNAPC3, SNAPC4, SNAPC5, TBP]
R-HSA:76071	RNA Polymerase III Transcription Initiation From Type 3 Promoter	REACTOME_Pathways_27.02.2019	1.70693e-13	6.54486e-13	4.08636e-49	2.78615e-48	[-1]	Group74	67.8571	19	[BDP1, CRCP, POLR1C, POLR2E, POLR2F, POLR2H, POLR2K, POLR2L, POLR3B, POLR3C, POLR3E, POLR3F, POLR3H, POLR3K, SNAPC1, SNAPC3, SNAPC4, SNAPC5, TBP]
R-HSA:73863	RNA Polymerase I Transcription Termination	REACTOME_Pathways_27.02.2019	9.04871e-15	3.7948e-14	4.08636e-49	2.78615e-48	[-1]	Group74	64.7059	22	[CCNH, ERCC2, ERCC3, GTF2H1, GTF2H3, GTF2H4, MNAT1, POLR1A, POLR1B, POLR1C, POLR1E, POLR2E, POLR2F, POLR2H, POLR2K, POLR2L, TAF1B, TAF1C, TBP, TWISTNB, UBTF, ZNRD1]
KEGG:03020	RNA polymerase	KEGG_27.02.2019	1.6628e-13	6.41228e-13	4.08636e-49	2.78615e-48	[-1]	Group74	64.5161	20	[POLR1A, POLR1B, POLR1C, POLR1E, POLR2A, POLR2C, POLR2E, POLR2F, POLR2G, POLR2H, POLR2K, POLR2L, POLR3B, POLR3C, POLR3E, POLR3F, POLR3H, POLR3K, TWISTNB, ZNRD1]
R-HSA:74158	RNA Polymerase III Transcription	REACTOME_Pathways_27.02.2019	1.02327e-15	4.67086e-15	4.08636e-49	2.78615e-48	[-1]	Group74	60.9756	25	[BDP1, BRF1, CRCP, GTF3A, GTF3C1, GTF3C2, GTF3C5, GTF3C6, POLR1C, POLR2E, POLR2F, POLR2H, POLR2K, POLR2L, POLR3B, POLR3C, POLR3E, POLR3F, POLR3H, POLR3K, SNAPC1, SNAPC3, SNAPC4, SNAPC5, TBP]
R-HSA:749476	RNA Polymerase III Abortive And Retractive Initiation	REACTOME_Pathways_27.02.2019	1.02327e-15	4.67086e-15	4.08636e-49	2.78615e-48	[-1]	Group74	60.9756	25	[BDP1, BRF1, CRCP, GTF3A, GTF3C1, GTF3C2, GTF3C5, GTF3C6, POLR1C, POLR2E, POLR2F, POLR2H, POLR2K, POLR2L, POLR3B, POLR3C, POLR3E, POLR3F, POLR3H, POLR3K, SNAPC1, SNAPC3, SNAPC4, SNAPC5, TBP]
R-HSA:167152	Formation of HIV elongation complex in the absence of HIV Tat	REACTOME_Pathways_27.02.2019	7.2138e-18	4.10208e-17	4.08636e-49	2.78615e-48	[-1]	Group74	60.4167	29	[CCNH, CCNK, CDK9, CTDP1, ELL, ELOB, ERCC2, ERCC3, GTF2F2, GTF2H1, GTF2H3, GTF2H4, MNAT1, NCBP1, NCBP2, NELFA, NELFB, NELFE, POLR2A, POLR2C, POLR2E, POLR2F, POLR2G, POLR2H, POLR2K, POLR2L, SSRP1, SUPT16H, SUPT5H]
R-HSA:167169	HIV Transcription Elongation	REACTOME_Pathways_27.02.2019	4.55451e-17	2.36905e-16	4.08636e-49	2.78615e-48	[-1]	Group74	59.5745	28	[CCNH, CDK9, CTDP1, ELL, ELOB, ERCC2, ERCC3, GTF2F2, GTF2H1, GTF2H3, GTF2H4, MNAT1, NCBP1, NCBP2, NELFA, NELFB, NELFE, POLR2A, POLR2C, POLR2E, POLR2F, POLR2G, POLR2H, POLR2K, POLR2L, SSRP1, SUPT16H, SUPT5H]
R-HSA:167200	Formation of HIV-1 elongation complex containing HIV-1 Tat	REACTOME_Pathways_27.02.2019	4.55451e-17	2.36905e-16	4.08636e-49	2.78615e-48	[-1]	Group74	59.5745	28	[CCNH, CDK9, CTDP1, ELL, ELOB, ERCC2, ERCC3, GTF2F2, GTF2H1, GTF2H3, GTF2H4, MNAT1, NCBP1, NCBP2, NELFA, NELFB, NELFE, POLR2A, POLR2C, POLR2E, POLR2F, POLR2G, POLR2H, POLR2K, POLR2L, SSRP1, SUPT16H, SUPT5H]
R-HSA:167246	Tat-mediated elongation of the HIV-1 transcript	REACTOME_Pathways_27.02.2019	4.55451e-17	2.36905e-16	4.08636e-49	2.78615e-48	[-1]	Group74	59.5745	28	[CCNH, CDK9, CTDP1, ELL, ELOB, ERCC2, ERCC3, GTF2F2, GTF2H1, GTF2H3, GTF2H4, MNAT1, NCBP1, NCBP2, NELFA, NELFB, NELFE, POLR2A, POLR2C, POLR2E, POLR2F, POLR2G, POLR2H, POLR2K, POLR2L, SSRP1, SUPT16H, SUPT5H]
R-HSA:159227	Transport of the SLBP independent Mature mRNA	REACTOME_Pathways_27.02.2019	2.04892e-12	7.47189e-12	4.08636e-49	2.78615e-48	[-1]	Group74	58.8235	20	[NCBP1, NCBP2, NDC1, NUP133, NUP153, NUP155, NUP160, NUP205, NUP214, NUP35, NUP43, NUP62, NUP85, NUP88, NUP98, NXF1, RAE1, SEC13, SEH1L, TPR]
R-HSA:6807505	RNA polymerase II transcribes snRNA genes	REACTOME_Pathways_27.02.2019	6.51863e-25	6.52836e-24	4.08636e-49	2.78615e-48	[-1]	Group74	58.1081	43	[CCNK, CDK9, ELL, GTF2A1, GTF2A2, GTF2B, GTF2E1, GTF2E2, GTF2F2, INTS1, INTS11, INTS13, INTS2, INTS4, INTS5, INTS6, INTS7, INTS8, INTS9, NCBP1, NCBP2, PCF11, PHAX, POLR2A, POLR2C, POLR2E, POLR2F, POLR2G, POLR2H, POLR2K, POLR2L, RPAP2, SNAPC1, SNAPC3, SNAPC4, SNAPC5, SRRT, SUPT5H, TAF5, TAF6, TAF8, TBP, ZC3H8]
R-HSA:8851708	Signaling by FGFR2 IIIa TM	REACTOME_Pathways_27.02.2019	2.73057e-07	6.66258e-07	4.08636e-49	2.78615e-48	[-1]	Group74	57.8947	11	[GTF2F2, NCBP1, NCBP2, POLR2A, POLR2C, POLR2E, POLR2F, POLR2G, POLR2H, POLR2K, POLR2L]
R-HSA:159230	Transport of the SLBP Dependant Mature mRNA	REACTOME_Pathways_27.02.2019	4.34294e-12	1.54186e-11	4.08636e-49	2.78615e-48	[-1]	Group74	57.1429	20	[NCBP1, NCBP2, NDC1, NUP133, NUP153, NUP155, NUP160, NUP205, NUP214, NUP35, NUP43, NUP62, NUP85, NUP88, NUP98, NXF1, RAE1, SEC13, SEH1L, TPR]
R-HSA:165054	Rev-mediated nuclear export of HIV RNA	REACTOME_Pathways_27.02.2019	4.34294e-12	1.54186e-11	4.08636e-49	2.78615e-48	[-1]	Group74	57.1429	20	[NDC1, NUP133, NUP153, NUP155, NUP160, NUP205, NUP214, NUP35, NUP43, NUP62, NUP85, NUP88, NUP98, RAE1, RANGAP1, RCC1, SEC13, SEH1L, TPR, XPO1]
R-HSA:177243	Interactions of Rev with host cellular proteins	REACTOME_Pathways_27.02.2019	1.50358e-12	5.63633e-12	4.08636e-49	2.78615e-48	[-1]	Group74	56.7568	21	[NDC1, NPM1, NUP133, NUP153, NUP155, NUP160, NUP205, NUP214, NUP35, NUP43, NUP62, NUP85, NUP88, NUP98, RAE1, RANGAP1, RCC1, SEC13, SEH1L, TPR, XPO1]
R-HSA:73980	RNA Polymerase III Transcription Termination	REACTOME_Pathways_27.02.2019	3.19546e-08	8.47491e-08	4.08636e-49	2.78615e-48	[-1]	Group74	56.5217	13	[CRCP, POLR1C, POLR2E, POLR2F, POLR2H, POLR2K, POLR2L, POLR3B, POLR3C, POLR3E, POLR3F, POLR3H, POLR3K]
R-HSA:167287	HIV elongation arrest and recovery	REACTOME_Pathways_27.02.2019	8.87676e-12	3.10224e-11	4.08636e-49	2.78615e-48	[-1]	Group74	55.5556	20	[CCNK, CDK9, CTDP1, ELL, ELOB, GTF2F2, NELFA, NELFB, NELFE, POLR2A, POLR2C, POLR2E, POLR2F, POLR2G, POLR2H, POLR2K, POLR2L, SSRP1, SUPT16H, SUPT5H]
R-HSA:167290	Pausing and recovery of HIV elongation	REACTOME_Pathways_27.02.2019	8.87676e-12	3.10224e-11	4.08636e-49	2.78615e-48	[-1]	Group74	55.5556	20	[CCNK, CDK9, CTDP1, ELL, ELOB, GTF2F2, NELFA, NELFB, NELFE, POLR2A, POLR2C, POLR2E, POLR2F, POLR2G, POLR2H, POLR2K, POLR2L, SSRP1, SUPT16H, SUPT5H]
R-HSA:167172	Transcription of the HIV genome	REACTOME_Pathways_27.02.2019	1.02126e-22	8.67428e-22	4.08636e-49	2.78615e-48	[-1]	Group74	55.4054	41	[CCNH, CCNK, CDK9, CTDP1, ELL, ELOB, ERCC2, ERCC3, GTF2A1, GTF2A2, GTF2B, GTF2E1, GTF2E2, GTF2F2, GTF2H1, GTF2H3, GTF2H4, MNAT1, NCBP1, NCBP2, NELFA, NELFB, NELFE, POLR2A, POLR2C, POLR2E, POLR2F, POLR2G, POLR2H, POLR2K, POLR2L, RNGTT, RNMT, SSRP1, SUPT16H, SUPT5H, TAF10, TAF5, TAF6, TAF7, TBP]
R-HSA:167161	HIV Transcription Initiation	REACTOME_Pathways_27.02.2019	7.36362e-15	3.14712e-14	4.08636e-49	2.78615e-48	[-1]	Group74	55.3191	26	[CCNH, ERCC2, ERCC3, GTF2A1, GTF2A2, GTF2B, GTF2E1, GTF2E2, GTF2F2, GTF2H1, GTF2H3, GTF2H4, MNAT1, POLR2A, POLR2C, POLR2E, POLR2F, POLR2G, POLR2H, POLR2K, POLR2L, TAF10, TAF5, TAF6, TAF7, TBP]
R-HSA:167162	RNA Polymerase II HIV Promoter Escape	REACTOME_Pathways_27.02.2019	7.36362e-15	3.14712e-14	4.08636e-49	2.78615e-48	[-1]	Group74	55.3191	26	[CCNH, ERCC2, ERCC3, GTF2A1, GTF2A2, GTF2B, GTF2E1, GTF2E2, GTF2F2, GTF2H1, GTF2H3, GTF2H4, MNAT1, POLR2A, POLR2C, POLR2E, POLR2F, POLR2G, POLR2H, POLR2K, POLR2L, TAF10, TAF5, TAF6, TAF7, TBP]
R-HSA:168325	Viral Messenger RNA Synthesis	REACTOME_Pathways_27.02.2019	7.36362e-15	3.14712e-14	4.08636e-49	2.78615e-48	[-1]	Group74	55.3191	26	[GTF2F2, NDC1, NUP133, NUP153, NUP155, NUP160, NUP205, NUP214, NUP35, NUP43, NUP62, NUP85, NUP88, NUP98, POLR2A, POLR2C, POLR2E, POLR2F, POLR2G, POLR2H, POLR2K, POLR2L, RAE1, SEC13, SEH1L, TPR]
R-HSA:73776	RNA Polymerase II Promoter Escape	REACTOME_Pathways_27.02.2019	7.36362e-15	3.14712e-14	4.08636e-49	2.78615e-48	[-1]	Group74	55.3191	26	[CCNH, ERCC2, ERCC3, GTF2A1, GTF2A2, GTF2B, GTF2E1, GTF2E2, GTF2F2, GTF2H1, GTF2H3, GTF2H4, MNAT1, POLR2A, POLR2C, POLR2E, POLR2F, POLR2G, POLR2H, POLR2K, POLR2L, TAF10, TAF5, TAF6, TAF7, TBP]
R-HSA:73779	RNA Polymerase II Transcription Pre-Initiation And Promoter Opening	REACTOME_Pathways_27.02.2019	7.36362e-15	3.14712e-14	4.08636e-49	2.78615e-48	[-1]	Group74	55.3191	26	[CCNH, ERCC2, ERCC3, GTF2A1, GTF2A2, GTF2B, GTF2E1, GTF2E2, GTF2F2, GTF2H1, GTF2H3, GTF2H4, MNAT1, POLR2A, POLR2C, POLR2E, POLR2F, POLR2G, POLR2H, POLR2K, POLR2L, TAF10, TAF5, TAF6, TAF7, TBP]
R-HSA:75953	RNA Polymerase II Transcription Initiation	REACTOME_Pathways_27.02.2019	7.36362e-15	3.14712e-14	4.08636e-49	2.78615e-48	[-1]	Group74	55.3191	26	[CCNH, ERCC2, ERCC3, GTF2A1, GTF2A2, GTF2B, GTF2E1, GTF2E2, GTF2F2, GTF2H1, GTF2H3, GTF2H4, MNAT1, POLR2A, POLR2C, POLR2E, POLR2F, POLR2G, POLR2H, POLR2K, POLR2L, TAF10, TAF5, TAF6, TAF7, TBP]
R-HSA:76042	RNA Polymerase II Transcription Initiation And Promoter Clearance	REACTOME_Pathways_27.02.2019	7.36362e-15	3.14712e-14	4.08636e-49	2.78615e-48	[-1]	Group74	55.3191	26	[CCNH, ERCC2, ERCC3, GTF2A1, GTF2A2, GTF2B, GTF2E1, GTF2E2, GTF2F2, GTF2H1, GTF2H3, GTF2H4, MNAT1, POLR2A, POLR2C, POLR2E, POLR2F, POLR2G, POLR2H, POLR2K, POLR2L, TAF10, TAF5, TAF6, TAF7, TBP]
R-HSA:167238	Pausing and recovery of Tat-mediated HIV elongation	REACTOME_Pathways_27.02.2019	5.12774e-11	1.729e-10	4.08636e-49	2.78615e-48	[-1]	Group74	54.2857	19	[CDK9, CTDP1, ELL, ELOB, GTF2F2, NELFA, NELFB, NELFE, POLR2A, POLR2C, POLR2E, POLR2F, POLR2G, POLR2H, POLR2K, POLR2L, SSRP1, SUPT16H, SUPT5H]
R-HSA:167243	Tat-mediated HIV elongation arrest and recovery	REACTOME_Pathways_27.02.2019	5.12774e-11	1.729e-10	4.08636e-49	2.78615e-48	[-1]	Group74	54.2857	19	[CDK9, CTDP1, ELL, ELOB, GTF2F2, NELFA, NELFB, NELFE, POLR2A, POLR2C, POLR2E, POLR2F, POLR2G, POLR2H, POLR2K, POLR2L, SSRP1, SUPT16H, SUPT5H]
R-HSA:174417	Telomere C-strand (Lagging Strand) Synthesis	REACTOME_Pathways_27.02.2019	6.34727e-08	1.62558e-07	4.08636e-49	2.78615e-48	[-1]	Group74	54.1667	13	[FEN1, PCNA, POLA2, POLD1, POLD2, POLD3, POLE2, PRIM1, RFC2, RFC3, RFC5, RPA2, RPA3]
R-HSA:6781823	Formation of TC-NER Pre-Incision Complex	REACTOME_Pathways_27.02.2019	5.87887e-16	2.73939e-15	4.08636e-49	2.78615e-48	[-1]	Group74	53.7037	29	[CCNH, COPS2, COPS3, COPS4, COPS5, COPS6, COPS8, DDB1, ERCC2, ERCC3, GPS1, GTF2H1, GTF2H3, GTF2H4, ISY1, MNAT1, POLR2A, POLR2C, POLR2E, POLR2F, POLR2G, POLR2H, POLR2K, POLR2L, PRPF19, RBX1, UBC, USP7, ZNF830]
R-HSA:180786	Extension of Telomeres	REACTOME_Pathways_27.02.2019	2.49296e-09	7.24144e-09	4.08636e-49	2.78615e-48	[-1]	Group74	53.3333	16	[FEN1, NHP2, PCNA, POLA2, POLD1, POLD2, POLD3, POLE2, PRIM1, RFC2, RFC3, RFC5, RPA2, RPA3, RUVBL1, RUVBL2]
R-HSA:112382	Formation of RNA Pol II elongation complex	REACTOME_Pathways_27.02.2019	4.50733e-17	2.36282e-16	4.08636e-49	2.78615e-48	[-1]	Group74	52.459	32	[CCNH, CCNK, CDC73, CDK9, CTDP1, CTR9, ELL, ELOB, ERCC2, ERCC3, GTF2F2, GTF2H1, GTF2H3, GTF2H4, MNAT1, NCBP1, NCBP2, NELFA, NELFB, NELFE, POLR2A, POLR2C, POLR2E, POLR2F, POLR2G, POLR2H, POLR2K, POLR2L, RTF1, SSRP1, SUPT16H, SUPT5H]
R-HSA:75955	RNA Polymerase II Transcription Elongation	REACTOME_Pathways_27.02.2019	4.50733e-17	2.36282e-16	4.08636e-49	2.78615e-48	[-1]	Group74	52.459	32	[CCNH, CCNK, CDC73, CDK9, CTDP1, CTR9, ELL, ELOB, ERCC2, ERCC3, GTF2F2, GTF2H1, GTF2H3, GTF2H4, MNAT1, NCBP1, NCBP2, NELFA, NELFB, NELFE, POLR2A, POLR2C, POLR2E, POLR2F, POLR2G, POLR2H, POLR2K, POLR2L, RTF1, SSRP1, SUPT16H, SUPT5H]
R-HSA:5651801	PCNA-Dependent Long Patch Base Excision Repair	REACTOME_Pathways_27.02.2019	1.05869e-06	2.44116e-06	4.08636e-49	2.78615e-48	[-1]	Group74	52.381	11	[FEN1, PCNA, POLD1, POLD2, POLD3, POLE2, RFC2, RFC3, RFC5, RPA2, RPA3]
R-HSA:6781827	Transcription-Coupled Nucleotide Excision Repair (TC-NER)	REACTOME_Pathways_27.02.2019	2.83525e-20	1.86515e-19	4.08636e-49	2.78615e-48	[-1]	Group74	50.6329	40	[CCNH, COPS2, COPS3, COPS4, COPS5, COPS6, COPS8, DDB1, ELL, ERCC2, ERCC3, GPS1, GTF2H1, GTF2H3, GTF2H4, ISY1, MNAT1, PCNA, POLD1, POLD2, POLD3, POLE2, POLR2A, POLR2C, POLR2E, POLR2F, POLR2G, POLR2H, POLR2K, POLR2L, PRPF19, RBX1, RFC2, RFC3, RFC5, RPA2, RPA3, UBC, USP7, ZNF830]
R-HSA:674695	RNA Polymerase II Pre-transcription Events	REACTOME_Pathways_27.02.2019	5.95688e-21	4.2522e-20	4.08636e-49	2.78615e-48	[-1]	Group74	50	42	[CCNH, CCNK, CDC73, CDK9, CTDP1, CTR9, ELL, ELOB, ERCC2, ERCC3, GTF2A1, GTF2A2, GTF2B, GTF2E1, GTF2E2, GTF2F2, GTF2H1, GTF2H3, GTF2H4, MNAT1, NCBP1, NCBP2, NELFA, NELFB, NELFE, POLR2A, POLR2C, POLR2E, POLR2F, POLR2G, POLR2H, POLR2K, POLR2L, RTF1, SSRP1, SUPT16H, SUPT5H, TAF10, TAF5, TAF6, TAF7, TBP]
R-HSA:73762	RNA Polymerase I Transcription Initiation	REACTOME_Pathways_27.02.2019	1.54068e-12	5.71158e-12	4.08636e-49	2.78615e-48	[-1]	Group74	50	24	[CCNH, CHD4, ERCC2, ERCC3, GTF2H1, GTF2H3, GTF2H4, MNAT1, POLR1A, POLR1B, POLR1C, POLR1E, POLR2E, POLR2F, POLR2H, POLR2K, POLR2L, RBBP4, TAF1B, TAF1C, TBP, TWISTNB, UBTF, ZNRD1]
R-HSA:6803529	FGFR2 alternative splicing	REACTOME_Pathways_27.02.2019	2.19236e-07	5.38854e-07	4.08636e-49	2.78615e-48	[-1]	Group74	50	13	[GTF2F2, HNRNPH1, NCBP1, NCBP2, POLR2A, POLR2C, POLR2E, POLR2F, POLR2G, POLR2H, POLR2K, POLR2L, PTBP1]
R-HSA:6782210	Gap-filling DNA repair synthesis and ligation in TC-NER	REACTOME_Pathways_27.02.2019	5.0576e-16	2.37318e-15	4.08636e-49	2.78615e-48	[-1]	Group74	49.2308	32	[CCNH, DDB1, ERCC2, ERCC3, GTF2H1, GTF2H3, GTF2H4, ISY1, MNAT1, PCNA, POLD1, POLD2, POLD3, POLE2, POLR2A, POLR2C, POLR2E, POLR2F, POLR2G, POLR2H, POLR2K, POLR2L, PRPF19, RBX1, RFC2, RFC3, RFC5, RPA2, RPA3, UBC, USP7, ZNF830]
R-HSA:6782135	Dual incision in TC-NER	REACTOME_Pathways_27.02.2019	8.90943e-16	4.09468e-15	4.08636e-49	2.78615e-48	[-1]	Group74	48.4848	32	[CCNH, DDB1, ERCC2, ERCC3, GTF2H1, GTF2H3, GTF2H4, ISY1, MNAT1, PCNA, POLD1, POLD2, POLD3, POLE2, POLR2A, POLR2C, POLR2E, POLR2F, POLR2G, POLR2H, POLR2K, POLR2L, PRPF19, RBX1, RFC2, RFC3, RFC5, RPA2, RPA3, UBC, USP7, ZNF830]
R-HSA:110314	Recognition of DNA damage by PCNA-containing replication complex	REACTOME_Pathways_27.02.2019	4.42714e-08	1.15588e-07	4.08636e-49	2.78615e-48	[-1]	Group74	48.3871	15	[DDB1, DTL, PCNA, POLD1, POLD2, POLD3, POLE2, RBX1, RFC2, RFC3, RFC5, RPA2, RPA3, UBC, WDR48]
R-HSA:162599	Late Phase of HIV Life Cycle	REACTOME_Pathways_27.02.2019	1.05656e-31	2.08516e-30	4.08636e-49	2.78615e-48	[-1]	Group74	47.2603	69	[CCNH, CCNK, CDK9, CHMP2A, CHMP5, CHMP6, CHMP7, CTDP1, ELL, ELOB, ERCC2, ERCC3, GTF2A1, GTF2A2, GTF2B, GTF2E1, GTF2E2, GTF2F2, GTF2H1, GTF2H3, GTF2H4, MNAT1, NCBP1, NCBP2, NDC1, NELFA, NELFB, NELFE, NUP133, NUP153, NUP155, NUP160, NUP205, NUP214, NUP35, NUP43, NUP62, NUP85, NUP88, NUP98, POLR2A, POLR2C, POLR2E, POLR2F, POLR2G, POLR2H, POLR2K, POLR2L, PPIA, RAE1, RANGAP1, RCC1, RNGTT, RNMT, SEC13,…
R-HSA:162587	HIV Life Cycle	REACTOME_Pathways_27.02.2019	2.27074e-33	4.76145e-32	4.08636e-49	2.78615e-48	[-1]	Group74	46.5409	74	[BANF1, CCNH, CCNK, CDK9, CHMP2A, CHMP5, CHMP6, CHMP7, CTDP1, ELL, ELOB, ERCC2, ERCC3, FEN1, GTF2A1, GTF2A2, GTF2B, GTF2E1, GTF2E2, GTF2F2, GTF2H1, GTF2H3, GTF2H4, HMGA1, MNAT1, NCBP1, NCBP2, NDC1, NELFA, NELFB, NELFE, NUP133, NUP153, NUP155, NUP160, NUP205, NUP214, NUP35, NUP43, NUP62, NUP85, NUP88, NUP98, POLR2A, POLR2C, POLR2E, POLR2F, POLR2G, POLR2H, POLR2K, POLR2L, PPIA, RAE1, RANGAP1, RCC1,…
R-HSA:6796648	TP53 Regulates Transcription of DNA Repair Genes	REACTOME_Pathways_27.02.2019	3.8089e-14	1.56796e-13	4.08636e-49	2.78615e-48	[-1]	Group74	46.1538	30	[BRCA1, CCNH, CCNK, CDK9, CHEK1, CTDP1, ELL, ELOB, ERCC2, ERCC3, GTF2F2, GTF2H1, GTF2H3, GTF2H4, MNAT1, NELFA, NELFB, NELFE, POLR2A, POLR2C, POLR2E, POLR2F, POLR2G, POLR2H, POLR2K, POLR2L, RAD51D, SSRP1, SUPT16H, SUPT5H]
R-HSA:110313	Translesion synthesis by Y family DNA polymerases bypasses lesions on DNA template	REACTOME_Pathways_27.02.2019	5.07818e-09	1.44384e-08	4.08636e-49	2.78615e-48	[-1]	Group74	46.1538	18	[MAD2L2, NPLOC4, PCNA, POLD1, POLD2, POLD3, POLE2, REV3L, RFC2, RFC3, RFC5, RPA2, RPA3, SPRTN, UBC, UFD1, USP10, VCP]
R-HSA:162906	HIV Infection	REACTOME_Pathways_27.02.2019	1.67472e-48	8.64413e-47	4.08636e-49	2.78615e-48	[-1]	Group74	45.8333	110	[ATP6V1H, BANF1, CCNH, CCNK, CDK9, CHMP2A, CHMP5, CHMP6, CHMP7, CTDP1, ELL, ELOB, ERCC2, ERCC3, FEN1, GTF2A1, GTF2A2, GTF2B, GTF2E1, GTF2E2, GTF2F2, GTF2H1, GTF2H3, GTF2H4, HMGA1, MNAT1, NCBP1, NCBP2, NDC1, NELFA, NELFB, NELFE, NPM1, NUP133, NUP153, NUP155, NUP160, NUP205, NUP214, NUP35, NUP43, NUP62, NUP85, NUP88, NUP98, POLR2A, POLR2C, POLR2E, POLR2F, POLR2G, POLR2H, POLR2K, POLR2L, PPIA, PSMA1…
R-HSA:73893	DNA Damage Bypass	REACTOME_Pathways_27.02.2019	1.93363e-10	6.12013e-10	4.08636e-49	2.78615e-48	[-1]	Group74	44.898	22	[DDB1, DTL, MAD2L2, NPLOC4, PCNA, POLD1, POLD2, POLD3, POLE2, RBX1, REV3L, RFC2, RFC3, RFC5, RPA2, RPA3, SPRTN, UBC, UFD1, USP10, VCP, WDR48]
KEGG:03022	Basal transcription factors	KEGG_27.02.2019	1.62359e-09	4.86352e-09	4.08636e-49	2.78615e-48	[-1]	Group74	44.4444	20	[CCNH, ERCC2, ERCC3, GTF2A1, GTF2A2, GTF2B, GTF2E1, GTF2E2, GTF2F2, GTF2H1, GTF2H3, GTF2H4, MNAT1, TAF10, TAF5, TAF6, TAF6L, TAF7, TAF8, TBP]
R-HSA:5696398	Nucleotide Excision Repair	REACTOME_Pathways_27.02.2019	3.1805e-21	2.34518e-20	4.08636e-49	2.78615e-48	[-1]	Group74	44.1441	49	[ACTB, ACTL6A, ACTR8, CCNH, COPS2, COPS3, COPS4, COPS5, COPS6, COPS8, DDB1, ELL, ERCC2, ERCC3, GPS1, GTF2H1, GTF2H3, GTF2H4, INO80, ISY1, MNAT1, PCNA, POLD1, POLD2, POLD3, POLE2, POLR2A, POLR2C, POLR2E, POLR2F, POLR2G, POLR2H, POLR2K, POLR2L, PRPF19, RBX1, RFC2, RFC3, RFC5, RPA2, RPA3, RUVBL1, SUMO2, UBC, UBE2I, UBE2N, USP7, YY1, ZNF830]
R-HSA:5696397	Gap-filling DNA repair synthesis and ligation in GG-NER	REACTOME_Pathways_27.02.2019	9.24261e-06	1.99414e-05	4.08636e-49	2.78615e-48	[-1]	Group74	44	11	[PCNA, POLD1, POLD2, POLD3, POLE2, RFC2, RFC3, RFC5, RPA2, RPA3, UBC]
R-HSA:5696400	Dual Incision in GG-NER	REACTOME_Pathways_27.02.2019	1.35993e-08	3.7094e-08	4.08636e-49	2.78615e-48	[-1]	Group74	43.9024	18	[DDB1, ERCC2, ERCC3, GTF2H1, GTF2H3, GTF2H4, PCNA, POLD1, POLD2, POLD3, POLE2, RBX1, RFC2, RFC3, RFC5, RPA2, RPA3, UBC]
R-HSA:5696399	Global Genome Nucleotide Excision Repair (GG-NER)	REACTOME_Pathways_27.02.2019	1.93269e-15	8.58829e-15	4.08636e-49	2.78615e-48	[-1]	Group74	42.8571	36	[ACTB, ACTL6A, ACTR8, CCNH, COPS2, COPS3, COPS4, COPS5, COPS6, COPS8, DDB1, ERCC2, ERCC3, GPS1, GTF2H1, GTF2H3, GTF2H4, INO80, MNAT1, PCNA, POLD1, POLD2, POLD3, POLE2, RBX1, RFC2, RFC3, RFC5, RPA2, RPA3, RUVBL1, SUMO2, UBC, UBE2I, UBE2N, YY1]
R-HSA:110373	Resolution of AP sites via the multiple-nucleotide patch replacement pathway	REACTOME_Pathways_27.02.2019	1.46082e-05	3.12168e-05	4.08636e-49	2.78615e-48	[-1]	Group74	42.3077	11	[FEN1, PCNA, POLD1, POLD2, POLD3, POLE2, RFC2, RFC3, RFC5, RPA2, RPA3]
R-HSA:5696394	DNA Damage Recognition in GG-NER	REACTOME_Pathways_27.02.2019	1.78451e-07	4.45133e-07	4.08636e-49	2.78615e-48	[-1]	Group74	42.1053	16	[ACTB, ACTL6A, ACTR8, COPS2, COPS3, COPS4, COPS5, COPS6, COPS8, DDB1, GPS1, INO80, RBX1, RUVBL1, UBC, YY1]
R-HSA:203927	MicroRNA (miRNA) biogenesis	REACTOME_Pathways_27.02.2019	4.23362e-05	8.66084e-05	4.08636e-49	2.78615e-48	[-1]	Group74	41.6667	10	[DICER1, POLR2A, POLR2C, POLR2E, POLR2F, POLR2G, POLR2H, POLR2K, POLR2L, XPO5]
KEGG:03420	Nucleotide excision repair	KEGG_27.02.2019	2.79355e-08	7.46802e-08	4.08636e-49	2.78615e-48	[-1]	Group74	40.4255	19	[CCNH, DDB1, ERCC2, ERCC3, GTF2H1, GTF2H3, GTF2H4, MNAT1, PCNA, POLD1, POLD2, POLD3, POLE2, RBX1, RFC2, RFC3, RFC5, RPA2, RPA3]
KEGG:03430	Mismatch repair	KEGG_27.02.2019	0.00018397	0.000357809	4.08636e-49	2.78615e-48	[-1]	Group74	39.1304	9	[PCNA, POLD1, POLD2, POLD3, RFC2, RFC3, RFC5, RPA2, RPA3]
R-HSA:5656169	Termination of translesion DNA synthesis	REACTOME_Pathways_27.02.2019	2.57894e-05	5.42466e-05	4.08636e-49	2.78615e-48	[-1]	Group74	37.5	12	[PCNA, POLD1, POLD2, POLD3, POLE2, RFC2, RFC3, RFC5, RPA2, RPA3, UBC, USP10]
R-HSA:5663205	Infectious disease	REACTOME_Pathways_27.02.2019	3.73877e-56	2.28065e-54	4.08636e-49	2.78615e-48	[-1]	Group74	37.0455	163	[ATP6V1H, BANF1, CBLL1, CCNH, CCNK, CDK9, CHMP2A, CHMP5, CHMP6, CHMP7, CLTC, CPSF4, CTDP1, EEF2, ELL, ELOB, ERCC2, ERCC3, FEN1, GRB2, GRSF1, GTF2A1, GTF2A2, GTF2B, GTF2E1, GTF2E2, GTF2F2, GTF2H1, GTF2H3, GTF2H4, HGS, HMGA1, MNAT1, NCBP1, NCBP2, NDC1, NELFA, NELFB, NELFE, NPM1, NUP133, NUP153, NUP155, NUP160, NUP205, NUP214, NUP35, NUP43, NUP62, NUP85, NUP88, NUP98, PABPN1, POLR2A, POLR2C, POLR2E,…
R-HSA:5696395	Formation of Incision Complex in GG-NER	REACTOME_Pathways_27.02.2019	7.19608e-06	1.57796e-05	4.08636e-49	2.78615e-48	[-1]	Group74	34.8837	15	[CCNH, DDB1, ERCC2, ERCC3, GTF2H1, GTF2H3, GTF2H4, MNAT1, RBX1, RPA2, RPA3, SUMO2, UBC, UBE2I, UBE2N]
R-HSA:73777	RNA Polymerase I Chain Elongation	REACTOME_Pathways_27.02.2019	1.53656e-10	4.95689e-10	4.08636e-49	2.78615e-48	[-1]	Group74	34.4444	31	[CCNH, ERCC2, ERCC3, GTF2H1, GTF2H3, GTF2H4, H2AFX, H2AFZ, H3F3A, HIST1H2BC, HIST1H2BJ, HIST1H2BL, HIST2H2AC, HIST2H2BE, HIST2H3D, MNAT1, POLR1A, POLR1B, POLR1C, POLR1E, POLR2E, POLR2F, POLR2H, POLR2K, POLR2L, TAF1B, TAF1C, TBP, TWISTNB, UBTF, ZNRD1]
R-HSA:1839126	FGFR2 mutant receptor activation	REACTOME_Pathways_27.02.2019	0.000192193	0.000372722	4.08636e-49	2.78615e-48	[-1]	Group74	33.3333	11	[GTF2F2, NCBP1, NCBP2, POLR2A, POLR2C, POLR2E, POLR2F, POLR2G, POLR2H, POLR2K, POLR2L]
R-HSA:427413	NoRC negatively regulates rRNA expression	REACTOME_Pathways_27.02.2019	9.57112e-11	3.14815e-10	4.08636e-49	2.78615e-48	[-1]	Group74	32.1101	35	[CCNH, ERCC2, ERCC3, GTF2H1, GTF2H3, GTF2H4, H2AFX, H2AFZ, H3F3A, HIST1H2BC, HIST1H2BJ, HIST1H2BL, HIST2H2AC, HIST2H2BE, HIST2H3D, MNAT1, POLR1A, POLR1B, POLR1C, POLR1E, POLR2E, POLR2F, POLR2H, POLR2K, POLR2L, SAP130, SAP18, SAP30BP, SIN3A, TAF1B, TAF1C, TBP, TWISTNB, UBTF, ZNRD1]
R-HSA:5578749	Transcriptional regulation by small RNAs	REACTOME_Pathways_27.02.2019	1.83296e-10	5.85674e-10	4.08636e-49	2.78615e-48	[-1]	Group74	32.0755	34	[H2AFX, H2AFZ, H3F3A, HIST1H2BC, HIST1H2BJ, HIST1H2BL, HIST2H2AC, HIST2H2BE, HIST2H3D, NDC1, NUP133, NUP153, NUP155, NUP160, NUP205, NUP214, NUP35, NUP43, NUP62, NUP85, NUP88, NUP98, POLR2A, POLR2C, POLR2E, POLR2F, POLR2G, POLR2H, POLR2K, POLR2L, RAE1, SEC13, SEH1L, TPR]
R-HSA:5250941	Negative epigenetic regulation of rRNA expression	REACTOME_Pathways_27.02.2019	2.22893e-10	7.02164e-10	4.08636e-49	2.78615e-48	[-1]	Group74	31.25	35	[CCNH, ERCC2, ERCC3, GTF2H1, GTF2H3, GTF2H4, H2AFX, H2AFZ, H3F3A, HIST1H2BC, HIST1H2BJ, HIST1H2BL, HIST2H2AC, HIST2H2BE, HIST2H3D, MNAT1, POLR1A, POLR1B, POLR1C, POLR1E, POLR2E, POLR2F, POLR2H, POLR2K, POLR2L, SAP130, SAP18, SAP30BP, SIN3A, TAF1B, TAF1C, TBP, TWISTNB, UBTF, ZNRD1]
R-HSA:1295596	Spry regulation of FGF signaling	REACTOME_Pathways_27.02.2019	0.01555	0.0250217	4.08636e-49	2.78615e-48	[-1]	Group74	31.25	5	[GRB2, PPP2CA, PPP2R1A, PTPN11, UBC]
R-HSA:73884	Base Excision Repair	REACTOME_Pathways_27.02.2019	0.00023384	0.000449589	4.08636e-49	2.78615e-48	[-1]	Group74	30.7692	12	[FEN1, PCNA, PNKP, POLD1, POLD2, POLD3, POLE2, RFC2, RFC3, RFC5, RPA2, RPA3]
R-HSA:73933	Resolution of Abasic Sites (AP sites)	REACTOME_Pathways_27.02.2019	0.00023384	0.000449589	4.08636e-49	2.78615e-48	[-1]	Group74	30.7692	12	[FEN1, PCNA, PNKP, POLD1, POLD2, POLD3, POLE2, RFC2, RFC3, RFC5, RPA2, RPA3]
R-HSA:73854	RNA Polymerase I Promoter Clearance	REACTOME_Pathways_27.02.2019	2.3562e-09	6.90398e-09	4.08636e-49	2.78615e-48	[-1]	Group74	30	33	[CCNH, CHD4, ERCC2, ERCC3, GTF2H1, GTF2H3, GTF2H4, H2AFX, H2AFZ, H3F3A, HIST1H2BC, HIST1H2BJ, HIST1H2BL, HIST2H2AC, HIST2H2BE, HIST2H3D, MNAT1, POLR1A, POLR1B, POLR1C, POLR1E, POLR2E, POLR2F, POLR2H, POLR2K, POLR2L, RBBP4, TAF1B, TAF1C, TBP, TWISTNB, UBTF, ZNRD1]
R-HSA:73894	DNA Repair	REACTOME_Pathways_27.02.2019	8.59955e-23	7.39782e-22	4.08636e-49	2.78615e-48	[-1]	Group74	29.1139	92	[ACTB, ACTL6A, ACTR8, BAP1, BARD1, BRCA1, BRCA2, CCNA2, CCNH, CHEK1, COPS2, COPS3, COPS4, COPS5, COPS6, COPS8, DCLRE1B, DDB1, DTL, ELL, ERCC2, ERCC3, FEN1, GPS1, GTF2H1, GTF2H3, GTF2H4, H2AFX, HIST1H2BC, HIST1H2BJ, HIST1H2BL, HIST2H2BE, HUS1, INO80, ISY1, MAD2L2, MNAT1, NPLOC4, PCNA, PNKP, POLD1, POLD2, POLD3, POLE2, POLR2A, POLR2C, POLR2E, POLR2F, POLR2G, POLR2H, POLR2K, POLR2L, PPP4C, PPP4R2, P…
R-HSA:73864	RNA Polymerase I Transcription	REACTOME_Pathways_27.02.2019	6.41344e-09	1.80059e-08	4.08636e-49	2.78615e-48	[-1]	Group74	28.9474	33	[CCNH, CHD4, ERCC2, ERCC3, GTF2H1, GTF2H3, GTF2H4, H2AFX, H2AFZ, H3F3A, HIST1H2BC, HIST1H2BJ, HIST1H2BL, HIST2H2AC, HIST2H2BE, HIST2H3D, MNAT1, POLR1A, POLR1B, POLR1C, POLR1E, POLR2E, POLR2F, POLR2H, POLR2K, POLR2L, RBBP4, TAF1B, TAF1C, TBP, TWISTNB, UBTF, ZNRD1]
R-HSA:5250924	B-WICH complex positively regulates rRNA expression	REACTOME_Pathways_27.02.2019	3.40594e-07	8.22081e-07	4.08636e-49	2.78615e-48	[-1]	Group74	28.5714	26	[ACTB, DDX21, H2AFX, H2AFZ, H3F3A, HIST1H2BC, HIST1H2BJ, HIST1H2BL, HIST2H2AC, HIST2H2BE, HIST2H3D, MYBBP1A, POLR1A, POLR1B, POLR1C, POLR1E, POLR2E, POLR2F, POLR2H, POLR2K, POLR2L, TAF1B, TAF1C, TBP, TWISTNB, ZNRD1]
R-HSA:1834949	Cytosolic sensors of pathogen-associated DNA	REACTOME_Pathways_27.02.2019	2.15094e-05	4.53861e-05	4.08636e-49	2.78615e-48	[-1]	Group74	28.5714	18	[CRCP, DHX36, DHX9, POLR1C, POLR2E, POLR2F, POLR2H, POLR2K, POLR2L, POLR3B, POLR3C, POLR3E, POLR3F, POLR3H, POLR3K, UBC, XRCC5, XRCC6]
R-HSA:5655253	Signaling by FGFR2 in disease	REACTOME_Pathways_27.02.2019	0.000634608	0.00116984	4.08636e-49	2.78615e-48	[-1]	Group74	27.907	12	[GRB2, GTF2F2, NCBP1, NCBP2, POLR2A, POLR2C, POLR2E, POLR2F, POLR2G, POLR2H, POLR2K, POLR2L]
R-HSA:5601884	PIWI-interacting RNA (piRNA) biogenesis	REACTOME_Pathways_27.02.2019	0.00544102	0.00917318	4.08636e-49	2.78615e-48	[-1]	Group74	27.5862	8	[POLR2A, POLR2C, POLR2E, POLR2F, POLR2G, POLR2H, POLR2K, POLR2L]
R-HSA:212165	Epigenetic regulation of gene expression	REACTOME_Pathways_27.02.2019	2.89647e-09	8.34135e-09	4.08636e-49	2.78615e-48	[-1]	Group74	26.4901	40	[ACTB, CCNH, CHD4, DDX21, ERCC2, ERCC3, GTF2H1, GTF2H3, GTF2H4, H2AFX, H2AFZ, H3F3A, HIST1H2BC, HIST1H2BJ, HIST1H2BL, HIST2H2AC, HIST2H2BE, HIST2H3D, MNAT1, MYBBP1A, POLR1A, POLR1B, POLR1C, POLR1E, POLR2E, POLR2F, POLR2H, POLR2K, POLR2L, RBBP4, SAP130, SAP18, SAP30BP, SIN3A, TAF1B, TAF1C, TBP, TWISTNB, UBTF, ZNRD1]
R-HSA:211000	Gene Silencing by RNA	REACTOME_Pathways_27.02.2019	1.82241e-08	4.93078e-08	4.08636e-49	2.78615e-48	[-1]	Group74	26.4706	36	[DICER1, H2AFX, H2AFZ, H3F3A, HIST1H2BC, HIST1H2BJ, HIST1H2BL, HIST2H2AC, HIST2H2BE, HIST2H3D, NDC1, NUP133, NUP153, NUP155, NUP160, NUP205, NUP214, NUP35, NUP43, NUP62, NUP85, NUP88, NUP98, POLR2A, POLR2C, POLR2E, POLR2F, POLR2G, POLR2H, POLR2K, POLR2L, RAE1, SEC13, SEH1L, TPR, XPO5]
R-HSA:5250913	Positive epigenetic regulation of rRNA expression	REACTOME_Pathways_27.02.2019	8.86959e-07	2.07369e-06	4.08636e-49	2.78615e-48	[-1]	Group74	26.1682	28	[ACTB, CHD4, DDX21, H2AFX, H2AFZ, H3F3A, HIST1H2BC, HIST1H2BJ, HIST1H2BL, HIST2H2AC, HIST2H2BE, HIST2H3D, MYBBP1A, POLR1A, POLR1B, POLR1C, POLR1E, POLR2E, POLR2F, POLR2H, POLR2K, POLR2L, RBBP4, TAF1B, TAF1C, TBP, TWISTNB, ZNRD1]
R-HSA:5654738	Signaling by FGFR2	REACTOME_Pathways_27.02.2019	0.00017754	0.000346306	4.08636e-49	2.78615e-48	[-1]	Group74	24.6575	18	[GRB2, GTF2F2, HNRNPH1, NCBP1, NCBP2, POLR2A, POLR2C, POLR2E, POLR2F, POLR2G, POLR2H, POLR2K, POLR2L, PPP2CA, PPP2R1A, PTBP1, PTPN11, UBC]
R-HSA:1226099	Signaling by FGFR in disease	REACTOME_Pathways_27.02.2019	0.000892263	0.00162252	4.08636e-49	2.78615e-48	[-1]	Group74	23.8095	15	[CPSF6, FGFR1OP, GRB2, GTF2F2, NCBP1, NCBP2, POLR2A, POLR2C, POLR2E, POLR2F, POLR2G, POLR2H, POLR2K, POLR2L, STAT5A]
R-HSA:3700989	Transcriptional Regulation by TP53	REACTOME_Pathways_27.02.2019	1.52356e-14	6.34974e-14	4.08636e-49	2.78615e-48	[-1]	Group74	23.224	85	[ARID3A, AURKB, BANP, BARD1, BIRC5, BRCA1, CCNA2, CCNH, CCNK, CDK9, CHD4, CHEK1, CNOT3, COX18, COX5A, COX5B, COX6C, COX7C, CSNK2B, CTDP1, CYCS, ELL, ELOB, ERCC2, ERCC3, GTF2F2, GTF2H1, GTF2H3, GTF2H4, HUS1, LAMTOR2, LAMTOR3, LAMTOR4, LRPPRC, MLST8, MNAT1, MTOR, NELFA, NELFB, NELFE, NOC2L, NPM1, PCNA, PDPK1, POLR2A, POLR2C, POLR2E, POLR2F, POLR2G, POLR2H, POLR2K, POLR2L, PPP2CA, PPP2R1A, PRMT1, PR…
R-HSA:2299718	Condensation of Prophase Chromosomes	REACTOME_Pathways_27.02.2019	0.00230544	0.00403904	4.08636e-49	2.78615e-48	[-1]	Group74	21.6216	16	[H2AFX, H2AFZ, H3F3A, HIST1H2BC, HIST1H2BJ, HIST1H2BL, HIST2H2AC, HIST2H2BE, HIST2H3D, NCAPD3, NCAPG2, NCAPH2, PLK1, SET, SMC2, SMC4]
R-HSA:452723	Transcriptional regulation of pluripotent stem cells	REACTOME_Pathways_27.02.2019	0.0243353	0.0372808	4.08636e-49	2.78615e-48	[-1]	Group74	21.6216	8	[POLR2A, POLR2C, POLR2E, POLR2F, POLR2G, POLR2H, POLR2K, POLR2L]
R-HSA:190236	Signaling by FGFR	REACTOME_Pathways_27.02.2019	0.00178841	0.00316629	4.08636e-49	2.78615e-48	[-1]	Group74	20.6897	18	[GRB2, GTF2F2, HNRNPH1, NCBP1, NCBP2, POLR2A, POLR2C, POLR2E, POLR2F, POLR2G, POLR2H, POLR2K, POLR2L, PPP2CA, PPP2R1A, PTBP1, PTPN11, UBC]
R-HSA:912446	Meiotic recombination	REACTOME_Pathways_27.02.2019	0.00508474	0.00859411	4.08636e-49	2.78615e-48	[-1]	Group74	19.7674	17	[BRCA1, BRCA2, H2AFX, H2AFZ, H3F3A, HIST1H2BC, HIST1H2BJ, HIST1H2BL, HIST2H2AC, HIST2H2BE, HIST2H3D, RAD51, RAD51C, RBBP8, RPA2, RPA3, TOP3A]
R-HSA:9018519	Estrogen-dependent gene expression	REACTOME_Pathways_27.02.2019	0.000417963	0.000785583	4.08636e-49	2.78615e-48	[-1]	Group74	19.3333	29	[CCND1, CDK9, DDX5, GTF2A1, GTF2A2, GTF2F2, H2AFX, H2AFZ, H3F3A, HIST1H2BC, HIST1H2BJ, HIST1H2BL, HIST2H2AC, HIST2H2BE, HIST2H3D, MYC, POLR2A, POLR2C, POLR2E, POLR2F, POLR2G, POLR2H, POLR2K, POLR2L, PRMT1, RAD21, SMC3, TBP, YY1]
KEGG:04623	Cytosolic DNA-sensing pathway	KEGG_27.02.2019	0.0295855	0.0447115	4.08636e-49	2.78615e-48	[-1]	Group74	19.0476	12	[POLR1C, POLR2E, POLR2F, POLR2H, POLR2K, POLR2L, POLR3B, POLR3C, POLR3E, POLR3F, POLR3H, POLR3K]
R-HSA:1500620	Meiosis	REACTOME_Pathways_27.02.2019	0.0027312	0.00473549	4.08636e-49	2.78615e-48	[-1]	Group74	18.6441	22	[ACD, BRCA1, BRCA2, H2AFX, H2AFZ, H3F3A, HIST1H2BC, HIST1H2BJ, HIST1H2BL, HIST2H2AC, HIST2H2BE, HIST2H3D, RAD21, RAD51, RAD51C, RBBP8, RPA2, RPA3, SMC3, TINF2, TOP3A, UBE2I]
R-HSA:8939211	ESR-mediated signaling	REACTOME_Pathways_27.02.2019	0.000613111	0.00113333	4.08636e-49	2.78615e-48	[-1]	Group74	18.5897	29	[CCND1, CDK9, DDX5, GTF2A1, GTF2A2, GTF2F2, H2AFX, H2AFZ, H3F3A, HIST1H2BC, HIST1H2BJ, HIST1H2BL, HIST2H2AC, HIST2H2BE, HIST2H3D, MYC, POLR2A, POLR2C, POLR2E, POLR2F, POLR2G, POLR2H, POLR2K, POLR2L, PRMT1, RAD21, SMC3, TBP, YY1]
R-HSA:2559582	Senescence-Associated Secretory Phenotype (SASP)	REACTOME_Pathways_27.02.2019	0.00565765	0.00949071	4.08636e-49	2.78615e-48	[-1]	Group74	18.1818	20	[ANAPC1, ANAPC10, ANAPC11, ANAPC15, ANAPC4, ANAPC5, CCNA2, CDC16, CDC23, CDC26, H2AFX, H2AFZ, H3F3A, HIST1H2BC, HIST1H2BJ, HIST1H2BL, HIST2H2AC, HIST2H2BE, HIST2H3D, UBC]
R-HSA:5617472	Activation of anterior HOX genes in hindbrain development during early embryogenesis	REACTOME_Pathways_27.02.2019	0.00505856	0.00857145	4.08636e-49	2.78615e-48	[-1]	Group74	18.0328	22	[CTCF, H2AFX, H2AFZ, H3F3A, HDAC3, HIST1H2BC, HIST1H2BJ, HIST1H2BL, HIST2H2AC, HIST2H2BE, HIST2H3D, POLR2A, POLR2C, POLR2E, POLR2F, POLR2G, POLR2H, POLR2K, POLR2L, RBBP4, WDR5, YY1]
R-HSA:5619507	Activation of HOX genes during differentiation	REACTOME_Pathways_27.02.2019	0.00505856	0.00857145	4.08636e-49	2.78615e-48	[-1]	Group74	18.0328	22	[CTCF, H2AFX, H2AFZ, H3F3A, HDAC3, HIST1H2BC, HIST1H2BJ, HIST1H2BL, HIST2H2AC, HIST2H2BE, HIST2H3D, POLR2A, POLR2C, POLR2E, POLR2F, POLR2G, POLR2H, POLR2K, POLR2L, RBBP4, WDR5, YY1]
R-HSA:1643685	Disease	REACTOME_Pathways_27.02.2019	1.18166e-16	5.91712e-16	4.08636e-49	2.78615e-48	[-1]	Group74	17.3642	195	[ACTB, ACTG1, ALG1, ALG14, ALG2, ATP6V1H, BANF1, CBLL1, CCDC59, CCNH, CCNK, CDK9, CHMP2A, CHMP5, CHMP6, CHMP7, CLTC, CPSF4, CPSF6, CSNK1A1, CTDP1, CUL1, DHDDS, DOLK, DPAGT1, DPM2, EEF2, ELL, ELOB, ERCC2, ERCC3, FDXR, FEN1, FGFR1OP, GRB2, GRSF1, GTF2A1, GTF2A2, GTF2B, GTF2E1, GTF2E2, GTF2F2, GTF2H1, GTF2H3, GTF2H4, HDAC3, HGS, HMGA1, MLST8, MNAT1, MTOR, MYC, NCBP1, NCBP2, NDC1, NELFA, NELFB, NELFE…
R-HSA:1474165	Reproduction	REACTOME_Pathways_27.02.2019	0.0332982	0.0493225	4.08636e-49	2.78615e-48	[-1]	Group74	15.2778	22	[ACD, BRCA1, BRCA2, H2AFX, H2AFZ, H3F3A, HIST1H2BC, HIST1H2BJ, HIST1H2BL, HIST2H2AC, HIST2H2BE, HIST2H3D, RAD21, RAD51, RAD51C, RBBP8, RPA2, RPA3, SMC3, TINF2, TOP3A, UBE2I]
R-HSA:9006931	Signaling by Nuclear Receptors	REACTOME_Pathways_27.02.2019	0.029443	0.0445966	4.08636e-49	2.78615e-48	[-1]	Group74	14.5729	29	[CCND1, CDK9, DDX5, GTF2A1, GTF2A2, GTF2F2, H2AFX, H2AFZ, H3F3A, HIST1H2BC, HIST1H2BJ, HIST1H2BL, HIST2H2AC, HIST2H2BE, HIST2H3D, MYC, POLR2A, POLR2C, POLR2E, POLR2F, POLR2G, POLR2H, POLR2K, POLR2L, PRMT1, RAD21, SMC3, TBP, YY1]
R-HSA:176974	Unwinding of DNA	REACTOME_Pathways_27.02.2019	4.29232e-09	1.2256e-08	4.06334e-46	2.53958e-45	[-1]	Group73	83.3333	10	[CDC45, GINS1, GINS2, GINS3, MCM2, MCM3, MCM4, MCM5, MCM6, MCM7]
R-HSA:174437	Removal of the Flap Intermediate from the C-strand	REACTOME_Pathways_27.02.2019	7.80349e-06	1.69454e-05	4.06334e-46	2.53958e-45	[-1]	Group73	70	7	[FEN1, PCNA, POLD1, POLD2, POLD3, RPA2, RPA3]
R-HSA:69190	DNA strand elongation	REACTOME_Pathways_27.02.2019	1.29104e-15	5.77523e-15	4.06334e-46	2.53958e-45	[-1]	Group73	68.75	22	[CDC45, FEN1, GINS1, GINS2, GINS3, MCM2, MCM3, MCM4, MCM5, MCM6, MCM7, PCNA, POLA2, POLD1, POLD2, POLD3, PRIM1, RFC2, RFC3, RFC5, RPA2, RPA3]
R-HSA:174411	Polymerase switching on the C-strand of the telomere	REACTOME_Pathways_27.02.2019	1.02002e-06	2.36011e-06	4.06334e-46	2.53958e-45	[-1]	Group73	64.2857	9	[PCNA, POLA2, POLD1, POLD2, POLD3, PRIM1, RFC2, RFC3, RFC5]
R-HSA:69091	Polymerase switching	REACTOME_Pathways_27.02.2019	1.02002e-06	2.36011e-06	4.06334e-46	2.53958e-45	[-1]	Group73	64.2857	9	[PCNA, POLA2, POLD1, POLD2, POLD3, PRIM1, RFC2, RFC3, RFC5]
R-HSA:69109	Leading Strand Synthesis	REACTOME_Pathways_27.02.2019	1.02002e-06	2.36011e-06	4.06334e-46	2.53958e-45	[-1]	Group73	64.2857	9	[PCNA, POLA2, POLD1, POLD2, POLD3, PRIM1, RFC2, RFC3, RFC5]
R-HSA:69166	Removal of the Flap Intermediate	REACTOME_Pathways_27.02.2019	1.02002e-06	2.36011e-06	4.06334e-46	2.53958e-45	[-1]	Group73	64.2857	9	[FEN1, PCNA, POLA2, POLD1, POLD2, POLD3, PRIM1, RPA2, RPA3]
R-HSA:174414	Processive synthesis on the C-strand of the telomere	REACTOME_Pathways_27.02.2019	1.96388e-05	4.18338e-05	4.06334e-46	2.53958e-45	[-1]	Group73	63.6364	7	[FEN1, PCNA, POLD1, POLD2, POLD3, RPA2, RPA3]
R-HSA:69239	Synthesis of DNA	REACTOME_Pathways_27.02.2019	2.85617e-46	1.27766e-44	4.06334e-46	2.53958e-45	[-1]	Group73	63.0252	75	[ANAPC1, ANAPC10, ANAPC11, ANAPC15, ANAPC4, ANAPC5, CCNA2, CDC16, CDC23, CDC26, CDC45, CDC6, CDT1, CUL1, FEN1, GINS1, GINS2, GINS3, MCM2, MCM3, MCM4, MCM5, MCM6, MCM7, ORC1, ORC3, ORC4, ORC5, PCNA, POLA2, POLD1, POLD2, POLD3, POLE2, PRIM1, PSMA1, PSMA2, PSMA3, PSMA4, PSMA5, PSMA6, PSMA7, PSMB1, PSMB2, PSMB3, PSMB4, PSMB5, PSMB6, PSMB7, PSMC1, PSMC2, PSMC3, PSMC4, PSMC5, PSMC6, PSMD11, PSMD12, PSM…
R-HSA:69186	Lagging Strand Synthesis	REACTOME_Pathways_27.02.2019	4.39551e-08	1.15211e-07	4.06334e-46	2.53958e-45	[-1]	Group73	60	12	[FEN1, PCNA, POLA2, POLD1, POLD2, POLD3, PRIM1, RFC2, RFC3, RFC5, RPA2, RPA3]
R-HSA:69183	Processive synthesis on the lagging strand	REACTOME_Pathways_27.02.2019	2.32792e-06	5.22419e-06	4.06334e-46	2.53958e-45	[-1]	Group73	60	9	[FEN1, PCNA, POLA2, POLD1, POLD2, POLD3, PRIM1, RPA2, RPA3]
R-HSA:69306	DNA Replication	REACTOME_Pathways_27.02.2019	1.64756e-44	6.14175e-43	4.06334e-46	2.53958e-45	[-1]	Group73	59.8425	76	[ANAPC1, ANAPC10, ANAPC11, ANAPC15, ANAPC4, ANAPC5, CCNA2, CDC16, CDC23, CDC26, CDC45, CDC6, CDC7, CDT1, CUL1, FEN1, GINS1, GINS2, GINS3, MCM2, MCM3, MCM4, MCM5, MCM6, MCM7, ORC1, ORC3, ORC4, ORC5, PCNA, POLA2, POLD1, POLD2, POLD3, POLE2, PRIM1, PSMA1, PSMA2, PSMA3, PSMA4, PSMA5, PSMA6, PSMA7, PSMB1, PSMB2, PSMB3, PSMB4, PSMB5, PSMB6, PSMB7, PSMC1, PSMC2, PSMC3, PSMC4, PSMC5, PSMC6, PSMD11, PSMD1…
R-HSA:176187	Activation of ATR in response to replication stress	REACTOME_Pathways_27.02.2019	1.15713e-13	4.51417e-13	4.06334e-46	2.53958e-45	[-1]	Group73	59.4595	22	[CDC45, CDC6, CDC7, CHEK1, HUS1, MCM2, MCM3, MCM4, MCM5, MCM6, MCM7, ORC1, ORC3, ORC4, ORC5, RAD17, RAD9A, RFC2, RFC3, RFC5, RPA2, RPA3]
R-HSA:110320	Translesion Synthesis by POLH	REACTOME_Pathways_27.02.2019	2.73057e-07	6.66258e-07	4.06334e-46	2.53958e-45	[-1]	Group73	57.8947	11	[NPLOC4, PCNA, RFC2, RFC3, RFC5, RPA2, RPA3, SPRTN, UBC, UFD1, VCP]
R-HSA:68962	Activation of the pre-replicative complex	REACTOME_Pathways_27.02.2019	1.25268e-11	4.35516e-11	4.06334e-46	2.53958e-45	[-1]	Group73	57.5758	19	[CDC45, CDC6, CDC7, CDT1, MCM2, MCM3, MCM4, MCM5, MCM6, MCM7, ORC1, ORC3, ORC4, ORC5, POLA2, POLE2, PRIM1, RPA2, RPA3]
R-HSA:110312	Translesion synthesis by REV1	REACTOME_Pathways_27.02.2019	4.85791e-06	1.0758e-05	4.06334e-46	2.53958e-45	[-1]	Group73	56.25	9	[MAD2L2, PCNA, REV3L, RFC2, RFC3, RFC5, RPA2, RPA3, UBC]
R-HSA:174417	Telomere C-strand (Lagging Strand) Synthesis	REACTOME_Pathways_27.02.2019	6.34727e-08	1.62558e-07	4.06334e-46	2.53958e-45	[-1]	Group73	54.1667	13	[FEN1, PCNA, POLA2, POLD1, POLD2, POLD3, POLE2, PRIM1, RFC2, RFC3, RFC5, RPA2, RPA3]
R-HSA:180786	Extension of Telomeres	REACTOME_Pathways_27.02.2019	2.49296e-09	7.24144e-09	4.06334e-46	2.53958e-45	[-1]	Group73	53.3333	16	[FEN1, NHP2, PCNA, POLA2, POLD1, POLD2, POLD3, POLE2, PRIM1, RFC2, RFC3, RFC5, RPA2, RPA3, RUVBL1, RUVBL2]
R-HSA:5655862	Translesion synthesis by POLK	REACTOME_Pathways_27.02.2019	9.42562e-06	2.02711e-05	4.06334e-46	2.53958e-45	[-1]	Group73	52.9412	9	[MAD2L2, PCNA, REV3L, RFC2, RFC3, RFC5, RPA2, RPA3, UBC]
R-HSA:5656121	Translesion synthesis by POLI	REACTOME_Pathways_27.02.2019	9.42562e-06	2.02711e-05	4.06334e-46	2.53958e-45	[-1]	Group73	52.9412	9	[MAD2L2, PCNA, REV3L, RFC2, RFC3, RFC5, RPA2, RPA3, UBC]
KEGG:03030	DNA replication	KEGG_27.02.2019	9.86664e-11	3.22952e-10	4.06334e-46	2.53958e-45	[-1]	Group73	52.7778	19	[FEN1, MCM2, MCM3, MCM4, MCM5, MCM6, MCM7, PCNA, POLA2, POLD1, POLD2, POLD3, POLE2, PRIM1, RFC2, RFC3, RFC5, RPA2, RPA3]
R-HSA:5651801	PCNA-Dependent Long Patch Base Excision Repair	REACTOME_Pathways_27.02.2019	1.05869e-06	2.44116e-06	4.06334e-46	2.53958e-45	[-1]	Group73	52.381	11	[FEN1, PCNA, POLD1, POLD2, POLD3, POLE2, RFC2, RFC3, RFC5, RPA2, RPA3]
R-HSA:69242	S Phase	REACTOME_Pathways_27.02.2019	1.17312e-41	4.14296e-40	4.06334e-46	2.53958e-45	[-1]	Group73	51.5528	83	[ANAPC1, ANAPC10, ANAPC11, ANAPC15, ANAPC4, ANAPC5, CCNA2, CCND1, CCNH, CDC16, CDC23, CDC26, CDC45, CDC6, CDT1, CUL1, FEN1, GINS1, GINS2, GINS3, MCM2, MCM3, MCM4, MCM5, MCM6, MCM7, MNAT1, MYC, ORC1, ORC3, ORC4, ORC5, PCNA, POLA2, POLD1, POLD2, POLD3, POLE2, PRIM1, PSMA1, PSMA2, PSMA3, PSMA4, PSMA5, PSMA6, PSMA7, PSMB1, PSMB2, PSMB3, PSMB4, PSMB5, PSMB6, PSMB7, PSMC1, PSMC2, PSMC3, PSMC4, PSMC5, P…
R-HSA:5693616	Presynaptic phase of homologous DNA pairing and strand exchange	REACTOME_Pathways_27.02.2019	6.27689e-11	2.1059e-10	4.06334e-46	2.53958e-45	[-1]	Group73	51.2821	20	[BARD1, BRCA1, BRCA2, CHEK1, HUS1, RAD17, RAD51, RAD51C, RAD51D, RAD9A, RBBP8, RFC2, RFC3, RFC5, RMI1, RPA2, RPA3, TOP3A, TOPBP1, XRCC2]
R-HSA:6781827	Transcription-Coupled Nucleotide Excision Repair (TC-NER)	REACTOME_Pathways_27.02.2019	2.83525e-20	1.86515e-19	4.06334e-46	2.53958e-45	[-1]	Group73	50.6329	40	[CCNH, COPS2, COPS3, COPS4, COPS5, COPS6, COPS8, DDB1, ELL, ERCC2, ERCC3, GPS1, GTF2H1, GTF2H3, GTF2H4, ISY1, MNAT1, PCNA, POLD1, POLD2, POLD3, POLE2, POLR2A, POLR2C, POLR2E, POLR2F, POLR2G, POLR2H, POLR2K, POLR2L, PRPF19, RBX1, RFC2, RFC3, RFC5, RPA2, RPA3, UBC, USP7, ZNF830]
R-HSA:5693579	Homologous DNA Pairing and Strand Exchange	REACTOME_Pathways_27.02.2019	3.88595e-11	1.31691e-10	4.06334e-46	2.53958e-45	[-1]	Group73	50	21	[BARD1, BRCA1, BRCA2, CHEK1, HUS1, RAD17, RAD51, RAD51C, RAD51D, RAD9A, RBBP8, RFC2, RFC3, RFC5, RMI1, RPA2, RPA3, TOP3A, TOPBP1, XRCC2, XRCC3]
R-HSA:6782210	Gap-filling DNA repair synthesis and ligation in TC-NER	REACTOME_Pathways_27.02.2019	5.0576e-16	2.37318e-15	4.06334e-46	2.53958e-45	[-1]	Group73	49.2308	32	[CCNH, DDB1, ERCC2, ERCC3, GTF2H1, GTF2H3, GTF2H4, ISY1, MNAT1, PCNA, POLD1, POLD2, POLD3, POLE2, POLR2A, POLR2C, POLR2E, POLR2F, POLR2G, POLR2H, POLR2K, POLR2L, PRPF19, RBX1, RFC2, RFC3, RFC5, RPA2, RPA3, UBC, USP7, ZNF830]
R-HSA:6782135	Dual incision in TC-NER	REACTOME_Pathways_27.02.2019	8.90943e-16	4.09468e-15	4.06334e-46	2.53958e-45	[-1]	Group73	48.4848	32	[CCNH, DDB1, ERCC2, ERCC3, GTF2H1, GTF2H3, GTF2H4, ISY1, MNAT1, PCNA, POLD1, POLD2, POLD3, POLE2, POLR2A, POLR2C, POLR2E, POLR2F, POLR2G, POLR2H, POLR2K, POLR2L, PRPF19, RBX1, RFC2, RFC3, RFC5, RPA2, RPA3, UBC, USP7, ZNF830]
R-HSA:110314	Recognition of DNA damage by PCNA-containing replication complex	REACTOME_Pathways_27.02.2019	4.42714e-08	1.15588e-07	4.06334e-46	2.53958e-45	[-1]	Group73	48.3871	15	[DDB1, DTL, PCNA, POLD1, POLD2, POLD3, POLE2, RBX1, RFC2, RFC3, RFC5, RPA2, RPA3, UBC, WDR48]
R-HSA:110313	Translesion synthesis by Y family DNA polymerases bypasses lesions on DNA template	REACTOME_Pathways_27.02.2019	5.07818e-09	1.44384e-08	4.06334e-46	2.53958e-45	[-1]	Group73	46.1538	18	[MAD2L2, NPLOC4, PCNA, POLD1, POLD2, POLD3, POLE2, REV3L, RFC2, RFC3, RFC5, RPA2, RPA3, SPRTN, UBC, UFD1, USP10, VCP]
R-HSA:73893	DNA Damage Bypass	REACTOME_Pathways_27.02.2019	1.93363e-10	6.12013e-10	4.06334e-46	2.53958e-45	[-1]	Group73	44.898	22	[DDB1, DTL, MAD2L2, NPLOC4, PCNA, POLD1, POLD2, POLD3, POLE2, RBX1, REV3L, RFC2, RFC3, RFC5, RPA2, RPA3, SPRTN, UBC, UFD1, USP10, VCP, WDR48]
R-HSA:5696398	Nucleotide Excision Repair	REACTOME_Pathways_27.02.2019	3.1805e-21	2.34518e-20	4.06334e-46	2.53958e-45	[-1]	Group73	44.1441	49	[ACTB, ACTL6A, ACTR8, CCNH, COPS2, COPS3, COPS4, COPS5, COPS6, COPS8, DDB1, ELL, ERCC2, ERCC3, GPS1, GTF2H1, GTF2H3, GTF2H4, INO80, ISY1, MNAT1, PCNA, POLD1, POLD2, POLD3, POLE2, POLR2A, POLR2C, POLR2E, POLR2F, POLR2G, POLR2H, POLR2K, POLR2L, PRPF19, RBX1, RFC2, RFC3, RFC5, RPA2, RPA3, RUVBL1, SUMO2, UBC, UBE2I, UBE2N, USP7, YY1, ZNF830]
R-HSA:5696397	Gap-filling DNA repair synthesis and ligation in GG-NER	REACTOME_Pathways_27.02.2019	9.24261e-06	1.99414e-05	4.06334e-46	2.53958e-45	[-1]	Group73	44	11	[PCNA, POLD1, POLD2, POLD3, POLE2, RFC2, RFC3, RFC5, RPA2, RPA3, UBC]
R-HSA:5696400	Dual Incision in GG-NER	REACTOME_Pathways_27.02.2019	1.35993e-08	3.7094e-08	4.06334e-46	2.53958e-45	[-1]	Group73	43.9024	18	[DDB1, ERCC2, ERCC3, GTF2H1, GTF2H3, GTF2H4, PCNA, POLD1, POLD2, POLD3, POLE2, RBX1, RFC2, RFC3, RFC5, RPA2, RPA3, UBC]
R-HSA:5696399	Global Genome Nucleotide Excision Repair (GG-NER)	REACTOME_Pathways_27.02.2019	1.93269e-15	8.58829e-15	4.06334e-46	2.53958e-45	[-1]	Group73	42.8571	36	[ACTB, ACTL6A, ACTR8, CCNH, COPS2, COPS3, COPS4, COPS5, COPS6, COPS8, DDB1, ERCC2, ERCC3, GPS1, GTF2H1, GTF2H3, GTF2H4, INO80, MNAT1, PCNA, POLD1, POLD2, POLD3, POLE2, RBX1, RFC2, RFC3, RFC5, RPA2, RPA3, RUVBL1, SUMO2, UBC, UBE2I, UBE2N, YY1]
R-HSA:5358565	Mismatch repair (MMR) directed by MSH2:MSH6 (MutSalpha)	REACTOME_Pathways_27.02.2019	0.00130829	0.00233474	4.06334e-46	2.53958e-45	[-1]	Group73	42.8571	6	[PCNA, POLD1, POLD2, POLD3, RPA2, RPA3]
R-HSA:5358606	Mismatch repair (MMR) directed by MSH2:MSH3 (MutSbeta)	REACTOME_Pathways_27.02.2019	0.00130829	0.00233474	4.06334e-46	2.53958e-45	[-1]	Group73	42.8571	6	[PCNA, POLD1, POLD2, POLD3, RPA2, RPA3]
R-HSA:110373	Resolution of AP sites via the multiple-nucleotide patch replacement pathway	REACTOME_Pathways_27.02.2019	1.46082e-05	3.12168e-05	4.06334e-46	2.53958e-45	[-1]	Group73	42.3077	11	[FEN1, PCNA, POLD1, POLD2, POLD3, POLE2, RFC2, RFC3, RFC5, RPA2, RPA3]
R-HSA:5693554	Resolution of D-loop Structures through Synthesis-Dependent Strand Annealing (SDSA)	REACTOME_Pathways_27.02.2019	1.46082e-05	3.12168e-05	4.06334e-46	2.53958e-45	[-1]	Group73	42.3077	11	[BARD1, BRCA1, BRCA2, RAD51, RAD51C, RAD51D, RBBP8, RMI1, TOP3A, XRCC2, XRCC3]
R-HSA:69481	G2/M Checkpoints	REACTOME_Pathways_27.02.2019	8.72419e-29	1.17079e-27	4.06334e-46	2.53958e-45	[-1]	Group73	42.2619	71	[BARD1, BRCA1, CDC45, CDC6, CDC7, CHEK1, H2AFX, HIST1H2BC, HIST1H2BJ, HIST1H2BL, HIST2H2BE, HUS1, MCM2, MCM3, MCM4, MCM5, MCM6, MCM7, ORC1, ORC3, ORC4, ORC5, PKMYT1, PSMA1, PSMA2, PSMA3, PSMA4, PSMA5, PSMA6, PSMA7, PSMB1, PSMB2, PSMB3, PSMB4, PSMB5, PSMB6, PSMB7, PSMC1, PSMC2, PSMC3, PSMC4, PSMC5, PSMC6, PSMD11, PSMD12, PSMD13, PSMD14, PSMD2, PSMD3, PSMD4, PSMD6, PSMD7, PSMD8, PSME1, RAD17, RAD9A…
KEGG:03440	Homologous recombination	KEGG_27.02.2019	9.65832e-08	2.46416e-07	4.06334e-46	2.53958e-45	[-1]	Group73	41.4634	17	[BARD1, BRCA1, BRCA2, POLD1, POLD2, POLD3, RAD51, RAD51C, RAD51D, RBBP8, RPA2, RPA3, SEM1, TOP3A, TOPBP1, XRCC2, XRCC3]
R-HSA:5685938	HDR through Single Strand Annealing (SSA)	REACTOME_Pathways_27.02.2019	7.82625e-07	1.8426e-06	4.06334e-46	2.53958e-45	[-1]	Group73	40.5405	15	[BARD1, BRCA1, HUS1, RAD17, RAD51, RAD9A, RBBP8, RFC2, RFC3, RFC5, RMI1, RPA2, RPA3, TOP3A, TOPBP1]
KEGG:03420	Nucleotide excision repair	KEGG_27.02.2019	2.79355e-08	7.46802e-08	4.06334e-46	2.53958e-45	[-1]	Group73	40.4255	19	[CCNH, DDB1, ERCC2, ERCC3, GTF2H1, GTF2H3, GTF2H4, MNAT1, PCNA, POLD1, POLD2, POLD3, POLE2, RBX1, RFC2, RFC3, RFC5, RPA2, RPA3]
R-HSA:5685942	HDR through Homologous Recombination (HRR)	REACTOME_Pathways_27.02.2019	3.66728e-11	1.24911e-10	4.06334e-46	2.53958e-45	[-1]	Group73	40.2985	27	[BARD1, BRCA1, BRCA2, CHEK1, HUS1, PCNA, POLD1, POLD2, POLD3, POLE2, RAD17, RAD51, RAD51C, RAD51D, RAD9A, RBBP8, RFC2, RFC3, RFC5, RMI1, RPA2, RPA3, TOP3A, TOPBP1, UBC, XRCC2, XRCC3]
R-HSA:5358508	Mismatch Repair	REACTOME_Pathways_27.02.2019	0.00200116	0.00352435	4.06334e-46	2.53958e-45	[-1]	Group73	40	6	[PCNA, POLD1, POLD2, POLD3, RPA2, RPA3]
KEGG:03430	Mismatch repair	KEGG_27.02.2019	0.00018397	0.000357809	4.06334e-46	2.53958e-45	[-1]	Group73	39.1304	9	[PCNA, POLD1, POLD2, POLD3, RFC2, RFC3, RFC5, RPA2, RPA3]
R-HSA:5656169	Termination of translesion DNA synthesis	REACTOME_Pathways_27.02.2019	2.57894e-05	5.42466e-05	4.06334e-46	2.53958e-45	[-1]	Group73	37.5	12	[PCNA, POLD1, POLD2, POLD3, POLE2, RFC2, RFC3, RFC5, RPA2, RPA3, UBC, USP10]
R-HSA:5696395	Formation of Incision Complex in GG-NER	REACTOME_Pathways_27.02.2019	7.19608e-06	1.57796e-05	4.06334e-46	2.53958e-45	[-1]	Group73	34.8837	15	[CCNH, DDB1, ERCC2, ERCC3, GTF2H1, GTF2H3, GTF2H4, MNAT1, RBX1, RPA2, RPA3, SUMO2, UBC, UBE2I, UBE2N]
R-HSA:5693568	Resolution of D-loop Structures through Holliday Junction Intermediates	REACTOME_Pathways_27.02.2019	0.000192193	0.000372722	4.06334e-46	2.53958e-45	[-1]	Group73	33.3333	11	[BARD1, BRCA1, BRCA2, RAD51, RAD51C, RAD51D, RBBP8, RMI1, TOP3A, XRCC2, XRCC3]
R-HSA:5693537	Resolution of D-Loop Structures	REACTOME_Pathways_27.02.2019	0.000259223	0.000496968	4.06334e-46	2.53958e-45	[-1]	Group73	32.3529	11	[BARD1, BRCA1, BRCA2, RAD51, RAD51C, RAD51D, RBBP8, RMI1, TOP3A, XRCC2, XRCC3]
R-HSA:5693567	HDR through Homologous Recombination (HRR) or Single Strand Annealing (SSA)	REACTOME_Pathways_27.02.2019	1.79103e-12	6.56711e-12	4.06334e-46	2.53958e-45	[-1]	Group73	31.8182	42	[BARD1, BRCA1, BRCA2, CCNA2, CHEK1, H2AFX, HIST1H2BC, HIST1H2BJ, HIST1H2BL, HIST2H2BE, HUS1, PCNA, POLD1, POLD2, POLD3, POLE2, PPP4C, PPP4R2, RAD17, RAD51, RAD51C, RAD51D, RAD9A, RBBP8, RFC2, RFC3, RFC5, RMI1, RNF168, RNF4, RNF8, RPA2, RPA3, SUMO2, TIPIN, TOP3A, TOPBP1, UBC, UBE2I, UBE2N, XRCC2, XRCC3]
R-HSA:73886	Chromosome Maintenance	REACTOME_Pathways_27.02.2019	1.27394e-10	4.12952e-10	4.06334e-46	2.53958e-45	[-1]	Group73	31.8182	35	[ACD, CENPA, CENPK, CENPW, FEN1, H2AFX, H2AFZ, HIST1H2BC, HIST1H2BJ, HIST1H2BL, HIST2H2AC, HIST2H2BE, HJURP, KNL1, MIS18A, MIS18BP1, NHP2, NPM1, OIP5, PCNA, POLA2, POLD1, POLD2, POLD3, POLE2, PRIM1, RBBP4, RFC2, RFC3, RFC5, RPA2, RPA3, RUVBL1, RUVBL2, TINF2]
R-HSA:5693607	Processing of DNA double-strand break ends	REACTOME_Pathways_27.02.2019	1.708e-09	5.09363e-09	4.06334e-46	2.53958e-45	[-1]	Group73	31.6327	31	[BARD1, BRCA1, CCNA2, CHEK1, H2AFX, HIST1H2BC, HIST1H2BJ, HIST1H2BL, HIST2H2BE, HUS1, PPP4C, PPP4R2, RAD17, RAD9A, RBBP8, RFC2, RFC3, RFC5, RMI1, RNF168, RNF4, RNF8, RPA2, RPA3, SUMO2, TIPIN, TOP3A, TOPBP1, UBC, UBE2I, UBE2N]
R-HSA:6804756	Regulation of TP53 Activity through Phosphorylation	REACTOME_Pathways_27.02.2019	6.24937e-09	1.7619e-08	4.06334e-46	2.53958e-45	[-1]	Group73	31.5217	29	[AURKB, BARD1, BRCA1, CCNA2, CHEK1, CSNK2B, HUS1, NOC2L, RAD17, RAD9A, RBBP8, RFC2, RFC3, RFC5, RMI1, RPA2, RPA3, SSRP1, SUPT16H, TAF10, TAF5, TAF6, TAF7, TBP, TOP3A, TOPBP1, TP53RK, TPX2, UBC]
R-HSA:5693538	Homology Directed Repair	REACTOME_Pathways_27.02.2019	2.16143e-12	7.83957e-12	4.06334e-46	2.53958e-45	[-1]	Group73	31.1594	43	[BARD1, BRCA1, BRCA2, CCNA2, CHEK1, FEN1, H2AFX, HIST1H2BC, HIST1H2BJ, HIST1H2BL, HIST2H2BE, HUS1, PCNA, POLD1, POLD2, POLD3, POLE2, PPP4C, PPP4R2, RAD17, RAD51, RAD51C, RAD51D, RAD9A, RBBP8, RFC2, RFC3, RFC5, RMI1, RNF168, RNF4, RNF8, RPA2, RPA3, SUMO2, TIPIN, TOP3A, TOPBP1, UBC, UBE2I, UBE2N, XRCC2, XRCC3]
R-HSA:73884	Base Excision Repair	REACTOME_Pathways_27.02.2019	0.00023384	0.000449589	4.06334e-46	2.53958e-45	[-1]	Group73	30.7692	12	[FEN1, PCNA, PNKP, POLD1, POLD2, POLD3, POLE2, RFC2, RFC3, RFC5, RPA2, RPA3]
R-HSA:73933	Resolution of Abasic Sites (AP sites)	REACTOME_Pathways_27.02.2019	0.00023384	0.000449589	4.06334e-46	2.53958e-45	[-1]	Group73	30.7692	12	[FEN1, PCNA, PNKP, POLD1, POLD2, POLD3, POLE2, RFC2, RFC3, RFC5, RPA2, RPA3]
R-HSA:157579	Telomere Maintenance	REACTOME_Pathways_27.02.2019	1.43527e-07	3.59352e-07	4.06334e-46	2.53958e-45	[-1]	Group73	30.4878	25	[ACD, FEN1, H2AFX, H2AFZ, HIST1H2BC, HIST1H2BJ, HIST1H2BL, HIST2H2AC, HIST2H2BE, NHP2, PCNA, POLA2, POLD1, POLD2, POLD3, POLE2, PRIM1, RFC2, RFC3, RFC5, RPA2, RPA3, RUVBL1, RUVBL2, TINF2]
R-HSA:73894	DNA Repair	REACTOME_Pathways_27.02.2019	8.59955e-23	7.39782e-22	4.06334e-46	2.53958e-45	[-1]	Group73	29.1139	92	[ACTB, ACTL6A, ACTR8, BAP1, BARD1, BRCA1, BRCA2, CCNA2, CCNH, CHEK1, COPS2, COPS3, COPS4, COPS5, COPS6, COPS8, DCLRE1B, DDB1, DTL, ELL, ERCC2, ERCC3, FEN1, GPS1, GTF2H1, GTF2H3, GTF2H4, H2AFX, HIST1H2BC, HIST1H2BJ, HIST1H2BL, HIST2H2BE, HUS1, INO80, ISY1, MAD2L2, MNAT1, NPLOC4, PCNA, PNKP, POLD1, POLD2, POLD3, POLE2, POLR2A, POLR2C, POLR2E, POLR2F, POLR2G, POLR2H, POLR2K, POLR2L, PPP4C, PPP4R2, P…
R-HSA:5250924	B-WICH complex positively regulates rRNA expression	REACTOME_Pathways_27.02.2019	3.40594e-07	8.22081e-07	4.06334e-46	2.53958e-45	[-1]	Group73	28.5714	26	[ACTB, DDX21, H2AFX, H2AFZ, H3F3A, HIST1H2BC, HIST1H2BJ, HIST1H2BL, HIST2H2AC, HIST2H2BE, HIST2H3D, MYBBP1A, POLR1A, POLR1B, POLR1C, POLR1E, POLR2E, POLR2F, POLR2H, POLR2K, POLR2L, TAF1B, TAF1C, TBP, TWISTNB, ZNRD1]
R-HSA:5693532	DNA Double-Strand Break Repair	REACTOME_Pathways_27.02.2019	3.56931e-11	1.22194e-10	4.06334e-46	2.53958e-45	[-1]	Group73	27.7108	46	[BAP1, BARD1, BRCA1, BRCA2, CCNA2, CHEK1, FEN1, H2AFX, HIST1H2BC, HIST1H2BJ, HIST1H2BL, HIST2H2BE, HUS1, PCNA, POLD1, POLD2, POLD3, POLE2, PPP4C, PPP4R2, RAD17, RAD51, RAD51C, RAD51D, RAD9A, RBBP8, RFC2, RFC3, RFC5, RMI1, RNF168, RNF4, RNF8, RPA2, RPA3, SUMO2, TIPIN, TOP3A, TOPBP1, UBC, UBE2I, UBE2N, XRCC2, XRCC3, XRCC5, XRCC6]
R-HSA:69473	G2/M DNA damage checkpoint	REACTOME_Pathways_27.02.2019	1.01661e-05	2.17938e-05	4.06334e-46	2.53958e-45	[-1]	Group73	25.2632	24	[BARD1, BRCA1, CHEK1, H2AFX, HIST1H2BC, HIST1H2BJ, HIST1H2BL, HIST2H2BE, HUS1, RAD17, RAD9A, RBBP8, RFC2, RFC3, RFC5, RMI1, RNF168, RNF8, RPA2, RPA3, TOP3A, TOPBP1, UBE2N, WEE1]
R-HSA:5633007	Regulation of TP53 Activity	REACTOME_Pathways_27.02.2019	5.50657e-08	1.42112e-07	4.06334e-46	2.53958e-45	[-1]	Group73	24.375	39	[AURKB, BANP, BARD1, BRCA1, CCNA2, CHD4, CHEK1, CSNK2B, HUS1, MLST8, MTOR, NOC2L, PDPK1, PPP2CA, PPP2R1A, PRMT5, RAD17, RAD9A, RBBP4, RBBP8, RFC2, RFC3, RFC5, RMI1, RPA2, RPA3, SSRP1, SUPT16H, TAF10, TAF5, TAF6, TAF7, TBP, TOP3A, TOPBP1, TP53RK, TPX2, UBC, USP7]
R-HSA:606279	Deposition of new CENPA-containing nucleosomes at the centromere	REACTOME_Pathways_27.02.2019	0.00021349	0.000411644	4.06334e-46	2.53958e-45	[-1]	Group73	24.3243	18	[CENPA, CENPK, CENPW, H2AFX, H2AFZ, HIST1H2BC, HIST1H2BJ, HIST1H2BL, HIST2H2AC, HIST2H2BE, HJURP, KNL1, MIS18A, MIS18BP1, NPM1, OIP5, RBBP4, RUVBL1]
R-HSA:774815	Nucleosome assembly	REACTOME_Pathways_27.02.2019	0.00021349	0.000411644	4.06334e-46	2.53958e-45	[-1]	Group73	24.3243	18	[CENPA, CENPK, CENPW, H2AFX, H2AFZ, HIST1H2BC, HIST1H2BJ, HIST1H2BL, HIST2H2AC, HIST2H2BE, HJURP, KNL1, MIS18A, MIS18BP1, NPM1, OIP5, RBBP4, RUVBL1]
R-HSA:3700989	Transcriptional Regulation by TP53	REACTOME_Pathways_27.02.2019	1.52356e-14	6.34974e-14	4.06334e-46	2.53958e-45	[-1]	Group73	23.224	85	[ARID3A, AURKB, BANP, BARD1, BIRC5, BRCA1, CCNA2, CCNH, CCNK, CDK9, CHD4, CHEK1, CNOT3, COX18, COX5A, COX5B, COX6C, COX7C, CSNK2B, CTDP1, CYCS, ELL, ELOB, ERCC2, ERCC3, GTF2F2, GTF2H1, GTF2H3, GTF2H4, HUS1, LAMTOR2, LAMTOR3, LAMTOR4, LRPPRC, MLST8, MNAT1, MTOR, NELFA, NELFB, NELFE, NOC2L, NPM1, PCNA, PDPK1, POLR2A, POLR2C, POLR2E, POLR2F, POLR2G, POLR2H, POLR2K, POLR2L, PPP2CA, PPP2R1A, PRMT1, PR…
R-HSA:2299718	Condensation of Prophase Chromosomes	REACTOME_Pathways_27.02.2019	0.00230544	0.00403904	4.06334e-46	2.53958e-45	[-1]	Group73	21.6216	16	[H2AFX, H2AFZ, H3F3A, HIST1H2BC, HIST1H2BJ, HIST1H2BL, HIST2H2AC, HIST2H2BE, HIST2H3D, NCAPD3, NCAPG2, NCAPH2, PLK1, SET, SMC2, SMC4]
KEGG:03460	Fanconi anemia pathway	KEGG_27.02.2019	0.0179071	0.0283388	4.06334e-46	2.53958e-45	[-1]	Group73	20.3704	11	[BRCA1, BRCA2, RAD51, RAD51C, REV3L, RMI1, RPA2, RPA3, TELO2, TOP3A, WDR48]
R-HSA:912446	Meiotic recombination	REACTOME_Pathways_27.02.2019	0.00508474	0.00859411	4.06334e-46	2.53958e-45	[-1]	Group73	19.7674	17	[BRCA1, BRCA2, H2AFX, H2AFZ, H3F3A, HIST1H2BC, HIST1H2BJ, HIST1H2BL, HIST2H2AC, HIST2H2BE, HIST2H3D, RAD51, RAD51C, RBBP8, RPA2, RPA3, TOP3A]
R-HSA:9018519	Estrogen-dependent gene expression	REACTOME_Pathways_27.02.2019	0.000417963	0.000785583	4.06334e-46	2.53958e-45	[-1]	Group73	19.3333	29	[CCND1, CDK9, DDX5, GTF2A1, GTF2A2, GTF2F2, H2AFX, H2AFZ, H3F3A, HIST1H2BC, HIST1H2BJ, HIST1H2BL, HIST2H2AC, HIST2H2BE, HIST2H3D, MYC, POLR2A, POLR2C, POLR2E, POLR2F, POLR2G, POLR2H, POLR2K, POLR2L, PRMT1, RAD21, SMC3, TBP, YY1]
R-HSA:1500620	Meiosis	REACTOME_Pathways_27.02.2019	0.0027312	0.00473549	4.06334e-46	2.53958e-45	[-1]	Group73	18.6441	22	[ACD, BRCA1, BRCA2, H2AFX, H2AFZ, H3F3A, HIST1H2BC, HIST1H2BJ, HIST1H2BL, HIST2H2AC, HIST2H2BE, HIST2H3D, RAD21, RAD51, RAD51C, RBBP8, RPA2, RPA3, SMC3, TINF2, TOP3A, UBE2I]
R-HSA:8939211	ESR-mediated signaling	REACTOME_Pathways_27.02.2019	0.000613111	0.00113333	4.06334e-46	2.53958e-45	[-1]	Group73	18.5897	29	[CCND1, CDK9, DDX5, GTF2A1, GTF2A2, GTF2F2, H2AFX, H2AFZ, H3F3A, HIST1H2BC, HIST1H2BJ, HIST1H2BL, HIST2H2AC, HIST2H2BE, HIST2H3D, MYC, POLR2A, POLR2C, POLR2E, POLR2F, POLR2G, POLR2H, POLR2K, POLR2L, PRMT1, RAD21, SMC3, TBP, YY1]
R-HSA:2559582	Senescence-Associated Secretory Phenotype (SASP)	REACTOME_Pathways_27.02.2019	0.00565765	0.00949071	4.06334e-46	2.53958e-45	[-1]	Group73	18.1818	20	[ANAPC1, ANAPC10, ANAPC11, ANAPC15, ANAPC4, ANAPC5, CCNA2, CDC16, CDC23, CDC26, H2AFX, H2AFZ, H3F3A, HIST1H2BC, HIST1H2BJ, HIST1H2BL, HIST2H2AC, HIST2H2BE, HIST2H3D, UBC]
R-HSA:5617472	Activation of anterior HOX genes in hindbrain development during early embryogenesis	REACTOME_Pathways_27.02.2019	0.00505856	0.00857145	4.06334e-46	2.53958e-45	[-1]	Group73	18.0328	22	[CTCF, H2AFX, H2AFZ, H3F3A, HDAC3, HIST1H2BC, HIST1H2BJ, HIST1H2BL, HIST2H2AC, HIST2H2BE, HIST2H3D, POLR2A, POLR2C, POLR2E, POLR2F, POLR2G, POLR2H, POLR2K, POLR2L, RBBP4, WDR5, YY1]
R-HSA:5619507	Activation of HOX genes during differentiation	REACTOME_Pathways_27.02.2019	0.00505856	0.00857145	4.06334e-46	2.53958e-45	[-1]	Group73	18.0328	22	[CTCF, H2AFX, H2AFZ, H3F3A, HDAC3, HIST1H2BC, HIST1H2BJ, HIST1H2BL, HIST2H2AC, HIST2H2BE, HIST2H3D, POLR2A, POLR2C, POLR2E, POLR2F, POLR2G, POLR2H, POLR2K, POLR2L, RBBP4, WDR5, YY1]
R-HSA:1474165	Reproduction	REACTOME_Pathways_27.02.2019	0.0332982	0.0493225	4.06334e-46	2.53958e-45	[-1]	Group73	15.2778	22	[ACD, BRCA1, BRCA2, H2AFX, H2AFZ, H3F3A, HIST1H2BC, HIST1H2BJ, HIST1H2BL, HIST2H2AC, HIST2H2BE, HIST2H3D, RAD21, RAD51, RAD51C, RBBP8, RPA2, RPA3, SMC3, TINF2, TOP3A, UBE2I]
R-HSA:9006931	Signaling by Nuclear Receptors	REACTOME_Pathways_27.02.2019	0.029443	0.0445966	4.06334e-46	2.53958e-45	[-1]	Group73	14.5729	29	[CCND1, CDK9, DDX5, GTF2A1, GTF2A2, GTF2F2, H2AFX, H2AFZ, H3F3A, HIST1H2BC, HIST1H2BJ, HIST1H2BL, HIST2H2AC, HIST2H2BE, HIST2H3D, MYC, POLR2A, POLR2C, POLR2E, POLR2F, POLR2G, POLR2H, POLR2K, POLR2L, PRMT1, RAD21, SMC3, TBP, YY1]
R-HSA:141405	Inhibition of the proteolytic activity of APC/C required for the onset of anaphase by mitotic spindle checkpoint components	REACTOME_Pathways_27.02.2019	2.8702e-09	8.30132e-09	2.07468e-42	1.19693e-41	[-1]	Group69	65	13	[ANAPC1, ANAPC10, ANAPC11, ANAPC15, ANAPC4, ANAPC5, BUB1B, BUB3, CDC16, CDC20, CDC23, CDC26, MAD2L1]
R-HSA:141430	Inactivation of APC/C via direct inhibition of the APC/C complex	REACTOME_Pathways_27.02.2019	2.8702e-09	8.30132e-09	2.07468e-42	1.19693e-41	[-1]	Group69	65	13	[ANAPC1, ANAPC10, ANAPC11, ANAPC15, ANAPC4, ANAPC5, BUB1B, BUB3, CDC16, CDC20, CDC23, CDC26, MAD2L1]
R-HSA:2467813	Separation of Sister Chromatids	REACTOME_Pathways_27.02.2019	2.5062e-39	8.40831e-38	2.07468e-42	1.19693e-41	[-1]	Group69	46.3158	88	[AHCTF1, ANAPC1, ANAPC10, ANAPC11, ANAPC15, ANAPC4, ANAPC5, AURKB, BIRC5, BUB1B, BUB3, CDC16, CDC20, CDC23, CDC26, CDCA8, CENPA, CENPE, CENPK, CKAP5, DSN1, DYNC1H1, DYNC1I2, ESPL1, INCENP, KIF18A, KNL1, MAD2L1, MIS12, NSL1, NUDC, NUF2, NUP133, NUP160, NUP43, NUP85, NUP98, PAFAH1B1, PLK1, PMF1, PPP2CA, PPP2R1A, PSMA1, PSMA2, PSMA3, PSMA4, PSMA5, PSMA6, PSMA7, PSMB1, PSMB2, PSMB3, PSMB4, PSMB5, PSM…
R-HSA:68882	Mitotic Anaphase	REACTOME_Pathways_27.02.2019	1.00036e-38	3.1964e-37	2.07468e-42	1.19693e-41	[-1]	Group69	44.7761	90	[AHCTF1, ANAPC1, ANAPC10, ANAPC11, ANAPC15, ANAPC4, ANAPC5, ANKLE2, AURKB, BANF1, BIRC5, BUB1B, BUB3, CDC16, CDC20, CDC23, CDC26, CDCA8, CENPA, CENPE, CENPK, CKAP5, DSN1, DYNC1H1, DYNC1I2, ESPL1, INCENP, KIF18A, KNL1, MAD2L1, MIS12, NSL1, NUDC, NUF2, NUP133, NUP160, NUP43, NUP85, NUP98, PAFAH1B1, PLK1, PMF1, PPP2CA, PPP2R1A, PSMA1, PSMA2, PSMA3, PSMA4, PSMA5, PSMA6, PSMA7, PSMB1, PSMB2, PSMB3, PS…
R-HSA:69618	Mitotic Spindle Checkpoint	REACTOME_Pathways_27.02.2019	6.724e-22	5.12705e-21	2.07468e-42	1.19693e-41	[-1]	Group69	44.6429	50	[AHCTF1, ANAPC1, ANAPC10, ANAPC11, ANAPC15, ANAPC4, ANAPC5, AURKB, BIRC5, BUB1B, BUB3, CDC16, CDC20, CDC23, CDC26, CDCA8, CENPA, CENPE, CENPK, CKAP5, DSN1, DYNC1H1, DYNC1I2, INCENP, KIF18A, KNL1, MAD2L1, MIS12, NSL1, NUDC, NUF2, NUP133, NUP160, NUP43, NUP85, NUP98, PAFAH1B1, PLK1, PMF1, PPP2CA, PPP2R1A, RANGAP1, SEC13, SEH1L, SGO1, SKA1, SPC24, SPC25, SPDL1, XPO1]
R-HSA:2555396	Mitotic Metaphase and Anaphase	REACTOME_Pathways_27.02.2019	1.64056e-38	5.00371e-37	2.07468e-42	1.19693e-41	[-1]	Group69	44.5545	90	[AHCTF1, ANAPC1, ANAPC10, ANAPC11, ANAPC15, ANAPC4, ANAPC5, ANKLE2, AURKB, BANF1, BIRC5, BUB1B, BUB3, CDC16, CDC20, CDC23, CDC26, CDCA8, CENPA, CENPE, CENPK, CKAP5, DSN1, DYNC1H1, DYNC1I2, ESPL1, INCENP, KIF18A, KNL1, MAD2L1, MIS12, NSL1, NUDC, NUF2, NUP133, NUP160, NUP43, NUP85, NUP98, PAFAH1B1, PLK1, PMF1, PPP2CA, PPP2R1A, PSMA1, PSMA2, PSMA3, PSMA4, PSMA5, PSMA6, PSMA7, PSMB1, PSMB2, PSMB3, PS…
R-HSA:141424	Amplification of signal from the kinetochores	REACTOME_Pathways_27.02.2019	2.46921e-17	1.31495e-16	2.07468e-42	1.19693e-41	[-1]	Group69	42.7083	41	[AHCTF1, AURKB, BIRC5, BUB1B, BUB3, CDC20, CDCA8, CENPA, CENPE, CENPK, CKAP5, DSN1, DYNC1H1, DYNC1I2, INCENP, KIF18A, KNL1, MAD2L1, MIS12, NSL1, NUDC, NUF2, NUP133, NUP160, NUP43, NUP85, NUP98, PAFAH1B1, PLK1, PMF1, PPP2CA, PPP2R1A, RANGAP1, SEC13, SEH1L, SGO1, SKA1, SPC24, SPC25, SPDL1, XPO1]
R-HSA:141444	Amplification of signal from unattached kinetochores via a MAD2 inhibitory signal	REACTOME_Pathways_27.02.2019	2.46921e-17	1.31495e-16	2.07468e-42	1.19693e-41	[-1]	Group69	42.7083	41	[AHCTF1, AURKB, BIRC5, BUB1B, BUB3, CDC20, CDCA8, CENPA, CENPE, CENPK, CKAP5, DSN1, DYNC1H1, DYNC1I2, INCENP, KIF18A, KNL1, MAD2L1, MIS12, NSL1, NUDC, NUF2, NUP133, NUP160, NUP43, NUP85, NUP98, PAFAH1B1, PLK1, PMF1, PPP2CA, PPP2R1A, RANGAP1, SEC13, SEH1L, SGO1, SKA1, SPC24, SPC25, SPDL1, XPO1]
R-HSA:69620	Cell Cycle Checkpoints	REACTOME_Pathways_27.02.2019	3.19238e-48	1.53006e-46	2.07468e-42	1.19693e-41	[-1]	Group69	41.6382	122	[AHCTF1, ANAPC1, ANAPC10, ANAPC11, ANAPC15, ANAPC4, ANAPC5, AURKB, BARD1, BIRC5, BRCA1, BUB1B, BUB3, CCNA2, CDC16, CDC20, CDC23, CDC26, CDC45, CDC6, CDC7, CDCA8, CENPA, CENPE, CENPK, CHEK1, CKAP5, DSN1, DYNC1H1, DYNC1I2, H2AFX, HIST1H2BC, HIST1H2BJ, HIST1H2BL, HIST2H2BE, HUS1, INCENP, KIF18A, KNL1, MAD2L1, MCM2, MCM3, MCM4, MCM5, MCM6, MCM7, MIS12, NSL1, NUDC, NUF2, NUP133, NUP160, NUP43, NUP85, …
R-HSA:2500257	Resolution of Sister Chromatid Cohesion	REACTOME_Pathways_27.02.2019	2.33434e-15	1.03049e-14	2.07468e-42	1.19693e-41	[-1]	Group69	35.7143	45	[AHCTF1, AURKB, BIRC5, BUB1B, BUB3, CDC20, CDCA8, CENPA, CENPE, CENPK, CKAP5, DSN1, DYNC1H1, DYNC1I2, INCENP, KIF18A, KNL1, MAD2L1, MIS12, NSL1, NUDC, NUF2, NUP133, NUP160, NUP43, NUP85, NUP98, PAFAH1B1, PLK1, PMF1, PPP2CA, PPP2R1A, RAD21, RANGAP1, SEC13, SEH1L, SGO1, SKA1, SMC3, SPC24, SPC25, SPDL1, TUBA1C, TUBB8, XPO1]
R-HSA:68886	M Phase	REACTOME_Pathways_27.02.2019	1.1236e-44	4.43492e-43	2.07468e-42	1.19693e-41	[-1]	Group69	35.1899	139	[ACTR1A, AHCTF1, ANAPC1, ANAPC10, ANAPC11, ANAPC15, ANAPC4, ANAPC5, ANKLE2, AURKB, BANF1, BIRC5, BUB1B, BUB3, CCP110, CDC16, CDC20, CDC23, CDC26, CDCA8, CENPA, CENPE, CENPK, CEP192, CKAP5, CSNK2B, DCTN2, DCTN3, DSN1, DYNC1H1, DYNC1I2, ESPL1, FGFR1OP, H2AFX, H2AFZ, H3F3A, HAUS1, HAUS3, HAUS4, HAUS5, HAUS8, HIST1H2BC, HIST1H2BJ, HIST1H2BL, HIST2H2AC, HIST2H2BE, HIST2H3D, INCENP, KIF18A, KNL1, MAD2L…
R-HSA:68877	Mitotic Prometaphase	REACTOME_Pathways_27.02.2019	1.28493e-22	1.07773e-21	2.07468e-42	1.19693e-41	[-1]	Group69	35	70	[ACTR1A, AHCTF1, AURKB, BIRC5, BUB1B, BUB3, CCP110, CDC20, CDCA8, CENPA, CENPE, CENPK, CEP192, CKAP5, CSNK2B, DCTN2, DCTN3, DSN1, DYNC1H1, DYNC1I2, FGFR1OP, HAUS1, HAUS3, HAUS4, HAUS5, HAUS8, INCENP, KIF18A, KNL1, MAD2L1, MIS12, MZT1, NCAPG, NCAPH, NEDD1, NSL1, NUDC, NUF2, NUP133, NUP160, NUP43, NUP85, NUP98, PAFAH1B1, PLK1, PLK4, PMF1, PPP2CA, PPP2R1A, RAD21, RANGAP1, SEC13, SEH1L, SGO1, SKA1, S…
R-HSA:69278	Cell Cycle, Mitotic	REACTOME_Pathways_27.02.2019	7.17418e-59	5.34875e-57	2.07468e-42	1.19693e-41	[-1]	Group69	34.5725	186	[ACTR1A, AHCTF1, ANAPC1, ANAPC10, ANAPC11, ANAPC15, ANAPC4, ANAPC5, ANKLE2, AURKB, BANF1, BIRC5, BUB1B, BUB3, CCNA2, CCND1, CCNH, CCP110, CDC16, CDC20, CDC23, CDC26, CDC45, CDC6, CDC7, CDCA8, CDK11A, CDT1, CENPA, CENPE, CENPK, CEP192, CKAP5, CSNK2B, CUL1, DCTN2, DCTN3, DSN1, DYNC1H1, DYNC1I2, ESPL1, FEN1, FGFR1OP, GINS1, GINS2, GINS3, H2AFX, H2AFZ, H3F3A, HAUS1, HAUS3, HAUS4, HAUS5, HAUS8, HIST1H…
R-HSA:5663220	RHO GTPases Activate Formins	REACTOME_Pathways_27.02.2019	8.57009e-15	3.63958e-14	2.07468e-42	1.19693e-41	[-1]	Group69	33.5714	47	[ACTB, ACTG1, AHCTF1, AURKB, BIRC5, BUB1B, BUB3, CDC20, CDCA8, CENPA, CENPE, CENPK, CKAP5, DSN1, DYNC1H1, DYNC1I2, INCENP, KIF18A, KNL1, MAD2L1, MIS12, NSL1, NUDC, NUF2, NUP133, NUP160, NUP43, NUP85, NUP98, PAFAH1B1, PFN1, PLK1, PMF1, PPP2CA, PPP2R1A, RANGAP1, SEC13, SEH1L, SGO1, SKA1, SPC24, SPC25, SPDL1, SRF, TUBA1C, TUBB8, XPO1]
R-HSA:1640170	Cell Cycle	REACTOME_Pathways_27.02.2019	8.12975e-65	9.09177e-63	2.07468e-42	1.19693e-41	[-1]	Group69	33.2815	214	[ACD, ACTR1A, AHCTF1, ANAPC1, ANAPC10, ANAPC11, ANAPC15, ANAPC4, ANAPC5, ANKLE2, AURKB, BANF1, BARD1, BIRC5, BRCA1, BRCA2, BUB1B, BUB3, CCNA2, CCND1, CCNH, CCP110, CDC16, CDC20, CDC23, CDC26, CDC45, CDC6, CDC7, CDCA8, CDK11A, CDT1, CENPA, CENPE, CENPK, CENPW, CEP192, CHEK1, CKAP5, CSNK2B, CUL1, DCTN2, DCTN3, DSN1, DYNC1H1, DYNC1I2, ESPL1, FEN1, FGFR1OP, GINS1, GINS2, GINS3, H2AFX, H2AFZ, H3F3A, H…
R-HSA:380270	Recruitment of mitotic centrosome proteins and complexes	REACTOME_Pathways_27.02.2019	7.20848e-09	2.01537e-08	2.07468e-42	1.19693e-41	[-1]	Group69	32.9268	27	[ACTR1A, CCP110, CDK11A, CEP192, CKAP5, DCTN2, DCTN3, DYNC1H1, DYNC1I2, FGFR1OP, HAUS1, HAUS3, HAUS4, HAUS5, HAUS8, MZT1, NEDD1, PAFAH1B1, PLK1, PLK4, PPP2R1A, TUBB, TUBG1, TUBGCP2, TUBGCP3, TUBGCP5, TUBGCP6]
R-HSA:380287	Centrosome maturation	REACTOME_Pathways_27.02.2019	7.20848e-09	2.01537e-08	2.07468e-42	1.19693e-41	[-1]	Group69	32.9268	27	[ACTR1A, CCP110, CDK11A, CEP192, CKAP5, DCTN2, DCTN3, DYNC1H1, DYNC1I2, FGFR1OP, HAUS1, HAUS3, HAUS4, HAUS5, HAUS8, MZT1, NEDD1, PAFAH1B1, PLK1, PLK4, PPP2R1A, TUBB, TUBG1, TUBGCP2, TUBGCP3, TUBGCP5, TUBGCP6]
R-HSA:8854518	AURKA Activation by TPX2	REACTOME_Pathways_27.02.2019	9.96126e-07	2.3128e-06	2.07468e-42	1.19693e-41	[-1]	Group69	30.137	22	[ACTR1A, CCP110, CEP192, CKAP5, DCTN2, DCTN3, DYNC1H1, DYNC1I2, FGFR1OP, HAUS1, HAUS3, HAUS4, HAUS5, HAUS8, NEDD1, PAFAH1B1, PLK1, PLK4, PPP2R1A, TPX2, TUBB, TUBG1]
R-HSA:380259	Loss of Nlp from mitotic centrosomes	REACTOME_Pathways_27.02.2019	1.89983e-06	4.30672e-06	2.07468e-42	1.19693e-41	[-1]	Group69	30	21	[ACTR1A, CCP110, CEP192, CKAP5, DCTN2, DCTN3, DYNC1H1, DYNC1I2, FGFR1OP, HAUS1, HAUS3, HAUS4, HAUS5, HAUS8, NEDD1, PAFAH1B1, PLK1, PLK4, PPP2R1A, TUBB, TUBG1]
R-HSA:380284	Loss of proteins required for interphase microtubule organization from the centrosome	REACTOME_Pathways_27.02.2019	1.89983e-06	4.30672e-06	2.07468e-42	1.19693e-41	[-1]	Group69	30	21	[ACTR1A, CCP110, CEP192, CKAP5, DCTN2, DCTN3, DYNC1H1, DYNC1I2, FGFR1OP, HAUS1, HAUS3, HAUS4, HAUS5, HAUS8, NEDD1, PAFAH1B1, PLK1, PLK4, PPP2R1A, TUBB, TUBG1]
R-HSA:380320	Recruitment of NuMA to mitotic centrosomes	REACTOME_Pathways_27.02.2019	4.52951e-08	1.17802e-07	2.07468e-42	1.19693e-41	[-1]	Group69	29.7872	28	[ACTR1A, CCP110, CEP192, CKAP5, DCTN2, DCTN3, DYNC1H1, DYNC1I2, FGFR1OP, HAUS1, HAUS3, HAUS4, HAUS5, HAUS8, MZT1, NEDD1, PAFAH1B1, PLK1, PLK4, PPP2R1A, TUBA1C, TUBB, TUBB8, TUBG1, TUBGCP2, TUBGCP3, TUBGCP5, TUBGCP6]
R-HSA:2565942	Regulation of PLK1 Activity at G2/M Transition	REACTOME_Pathways_27.02.2019	6.42756e-07	1.52399e-06	2.07468e-42	1.19693e-41	[-1]	Group69	28.4091	25	[ACTR1A, CCP110, CEP192, CKAP5, CUL1, DCTN2, DCTN3, DYNC1H1, DYNC1I2, FGFR1OP, HAUS1, HAUS3, HAUS4, HAUS5, HAUS8, NEDD1, PAFAH1B1, PLK1, PLK4, PPP1R12A, PPP2R1A, SKP1, TUBB, TUBG1, UBC]
R-HSA:5620912	Anchoring of the basal body to the plasma membrane	REACTOME_Pathways_27.02.2019	0.000198259	0.000383377	2.07468e-42	1.19693e-41	[-1]	Group69	22.449	22	[ACTR1A, CCP110, CEP192, CEP97, CKAP5, DCTN2, DCTN3, DYNC1H1, DYNC1I2, FGFR1OP, HAUS1, HAUS3, HAUS4, HAUS5, HAUS8, NEDD1, PAFAH1B1, PLK1, PLK4, PPP2R1A, TUBB, TUBG1]
R-HSA:195258	RHO GTPase Effectors	REACTOME_Pathways_27.02.2019	1.2923e-09	3.8885e-09	2.07468e-42	1.19693e-41	[-1]	Group69	20.7951	68	[ACTB, ACTG1, ACTR2, AHCTF1, ARPC3, AURKB, BIRC5, BUB1B, BUB3, CDC20, CDCA8, CENPA, CENPE, CENPK, CKAP5, DSN1, DYNC1H1, DYNC1I2, GRB2, H2AFX, H2AFZ, H3F3A, HIST1H2BC, HIST1H2BJ, HIST1H2BL, HIST2H2AC, HIST2H2BE, HIST2H3D, INCENP, KIF14, KIF18A, KNL1, MAD2L1, MIS12, NCKAP1, NSL1, NUDC, NUF2, NUP133, NUP160, NUP43, NUP85, NUP98, PAFAH1B1, PDPK1, PFN1, PIK3C3, PIK3R4, PLK1, PMF1, PPP1R12A, PPP2CA, PP…
R-HSA:5617833	Cilium Assembly	REACTOME_Pathways_27.02.2019	0.00265082	0.00460802	2.07468e-42	1.19693e-41	[-1]	Group69	16.4179	33	[ACTR1A, ARF4, CCP110, CCT2, CCT3, CCT4, CCT8, CEP192, CEP97, CKAP5, DCTN2, DCTN3, DYNC1H1, DYNC1I2, DYNLRB1, EXOC1, EXOC5, EXOC8, FGFR1OP, HAUS1, HAUS3, HAUS4, HAUS5, HAUS8, NEDD1, PAFAH1B1, PLK1, PLK4, PPP2R1A, TUBA1C, TUBB, TUBB8, TUBG1]
R-HSA:194315	Signaling by Rho GTPases	REACTOME_Pathways_27.02.2019	0.000140145	0.000274963	2.07468e-42	1.19693e-41	[-1]	Group69	15.3846	70	[ACTB, ACTG1, ACTR2, AHCTF1, ARPC3, AURKB, BIRC5, BUB1B, BUB3, CDC20, CDCA8, CENPA, CENPE, CENPK, CKAP5, DSN1, DYNC1H1, DYNC1I2, GRB2, H2AFX, H2AFZ, H3F3A, HIST1H2BC, HIST1H2BJ, HIST1H2BL, HIST2H2AC, HIST2H2BE, HIST2H3D, INCENP, KIF14, KIF18A, KNL1, MAD2L1, MIS12, NCKAP1, NSL1, NUDC, NUF2, NUP133, NUP160, NUP43, NUP85, NUP98, PAFAH1B1, PDPK1, PFN1, PIK3C3, PIK3R4, PLK1, PMF1, PPP1R12A, PPP2CA, PP…
R-HSA:176974	Unwinding of DNA	REACTOME_Pathways_27.02.2019	4.29232e-09	1.2256e-08	7.93709e-41	4.25201e-40	[-1]	Group63	83.3333	10	[CDC45, GINS1, GINS2, GINS3, MCM2, MCM3, MCM4, MCM5, MCM6, MCM7]
R-HSA:69190	DNA strand elongation	REACTOME_Pathways_27.02.2019	1.29104e-15	5.77523e-15	7.93709e-41	4.25201e-40	[-1]	Group63	68.75	22	[CDC45, FEN1, GINS1, GINS2, GINS3, MCM2, MCM3, MCM4, MCM5, MCM6, MCM7, PCNA, POLA2, POLD1, POLD2, POLD3, PRIM1, RFC2, RFC3, RFC5, RPA2, RPA3]
R-HSA:69002	DNA Replication Pre-Initiation	REACTOME_Pathways_27.02.2019	1.9358e-31	3.51061e-30	7.93709e-41	4.25201e-40	[-1]	Group63	61.1765	52	[CDC45, CDC6, CDC7, CDT1, MCM2, MCM3, MCM4, MCM5, MCM6, MCM7, ORC1, ORC3, ORC4, ORC5, POLA2, POLE2, PRIM1, PSMA1, PSMA2, PSMA3, PSMA4, PSMA5, PSMA6, PSMA7, PSMB1, PSMB2, PSMB3, PSMB4, PSMB5, PSMB6, PSMB7, PSMC1, PSMC2, PSMC3, PSMC4, PSMC5, PSMC6, PSMD11, PSMD12, PSMD13, PSMD14, PSMD2, PSMD3, PSMD4, PSMD6, PSMD7, PSMD8, PSME1, RPA2, RPA3, SEM1, UBC]
R-HSA:176187	Activation of ATR in response to replication stress	REACTOME_Pathways_27.02.2019	1.15713e-13	4.51417e-13	7.93709e-41	4.25201e-40	[-1]	Group63	59.4595	22	[CDC45, CDC6, CDC7, CHEK1, HUS1, MCM2, MCM3, MCM4, MCM5, MCM6, MCM7, ORC1, ORC3, ORC4, ORC5, RAD17, RAD9A, RFC2, RFC3, RFC5, RPA2, RPA3]
R-HSA:68962	Activation of the pre-replicative complex	REACTOME_Pathways_27.02.2019	1.25268e-11	4.35516e-11	7.93709e-41	4.25201e-40	[-1]	Group63	57.5758	19	[CDC45, CDC6, CDC7, CDT1, MCM2, MCM3, MCM4, MCM5, MCM6, MCM7, ORC1, ORC3, ORC4, ORC5, POLA2, POLE2, PRIM1, RPA2, RPA3]
KEGG:03030	DNA replication	KEGG_27.02.2019	9.86664e-11	3.22952e-10	7.93709e-41	4.25201e-40	[-1]	Group63	52.7778	19	[FEN1, MCM2, MCM3, MCM4, MCM5, MCM6, MCM7, PCNA, POLA2, POLD1, POLD2, POLD3, POLE2, PRIM1, RFC2, RFC3, RFC5, RPA2, RPA3]
R-HSA:5693616	Presynaptic phase of homologous DNA pairing and strand exchange	REACTOME_Pathways_27.02.2019	6.27689e-11	2.1059e-10	7.93709e-41	4.25201e-40	[-1]	Group63	51.2821	20	[BARD1, BRCA1, BRCA2, CHEK1, HUS1, RAD17, RAD51, RAD51C, RAD51D, RAD9A, RBBP8, RFC2, RFC3, RFC5, RMI1, RPA2, RPA3, TOP3A, TOPBP1, XRCC2]
R-HSA:5693579	Homologous DNA Pairing and Strand Exchange	REACTOME_Pathways_27.02.2019	3.88595e-11	1.31691e-10	7.93709e-41	4.25201e-40	[-1]	Group63	50	21	[BARD1, BRCA1, BRCA2, CHEK1, HUS1, RAD17, RAD51, RAD51C, RAD51D, RAD9A, RBBP8, RFC2, RFC3, RFC5, RMI1, RPA2, RPA3, TOP3A, TOPBP1, XRCC2, XRCC3]
R-HSA:69206	G1/S Transition	REACTOME_Pathways_27.02.2019	1.61058e-31	3.00194e-30	7.93709e-41	4.25201e-40	[-1]	Group63	49.6183	65	[CCNA2, CCND1, CCNH, CDC45, CDC6, CDC7, CDT1, CUL1, MCM2, MCM3, MCM4, MCM5, MCM6, MCM7, MNAT1, MYC, ORC1, ORC3, ORC4, ORC5, PCNA, POLA2, POLE2, PPP2CA, PPP2R1A, PRIM1, PSMA1, PSMA2, PSMA3, PSMA4, PSMA5, PSMA6, PSMA7, PSMB1, PSMB2, PSMB3, PSMB4, PSMB5, PSMB6, PSMB7, PSMC1, PSMC2, PSMC3, PSMC4, PSMC5, PSMC6, PSMD11, PSMD12, PSMD13, PSMD14, PSMD2, PSMD3, PSMD4, PSMD6, PSMD7, PSMD8, PSME1, RBBP4, RPA…
R-HSA:68689	CDC6 association with the ORC:origin complex	REACTOME_Pathways_27.02.2019	0.00248972	0.00435053	7.93709e-41	4.25201e-40	[-1]	Group63	45.4545	5	[CDC6, ORC1, ORC3, ORC4, ORC5]
R-HSA:453279	Mitotic G1-G1/S phases	REACTOME_Pathways_27.02.2019	2.74421e-28	3.47427e-27	7.93709e-41	4.25201e-40	[-1]	Group63	44.2953	66	[CCNA2, CCND1, CCNH, CDC45, CDC6, CDC7, CDT1, CUL1, MCM2, MCM3, MCM4, MCM5, MCM6, MCM7, MNAT1, MYC, ORC1, ORC3, ORC4, ORC5, PCNA, POLA2, POLE2, PPP2CA, PPP2R1A, PRIM1, PSMA1, PSMA2, PSMA3, PSMA4, PSMA5, PSMA6, PSMA7, PSMB1, PSMB2, PSMB3, PSMB4, PSMB5, PSMB6, PSMB7, PSMC1, PSMC2, PSMC3, PSMC4, PSMC5, PSMC6, PSMD11, PSMD12, PSMD13, PSMD14, PSMD2, PSMD3, PSMD4, PSMD6, PSMD7, PSMD8, PSME1, RBBP4, RPA…
R-HSA:69481	G2/M Checkpoints	REACTOME_Pathways_27.02.2019	8.72419e-29	1.17079e-27	7.93709e-41	4.25201e-40	[-1]	Group63	42.2619	71	[BARD1, BRCA1, CDC45, CDC6, CDC7, CHEK1, H2AFX, HIST1H2BC, HIST1H2BJ, HIST1H2BL, HIST2H2BE, HUS1, MCM2, MCM3, MCM4, MCM5, MCM6, MCM7, ORC1, ORC3, ORC4, ORC5, PKMYT1, PSMA1, PSMA2, PSMA3, PSMA4, PSMA5, PSMA6, PSMA7, PSMB1, PSMB2, PSMB3, PSMB4, PSMB5, PSMB6, PSMB7, PSMC1, PSMC2, PSMC3, PSMC4, PSMC5, PSMC6, PSMD11, PSMD12, PSMD13, PSMD14, PSMD2, PSMD3, PSMD4, PSMD6, PSMD7, PSMD8, PSME1, RAD17, RAD9A…
R-HSA:5685938	HDR through Single Strand Annealing (SSA)	REACTOME_Pathways_27.02.2019	7.82625e-07	1.8426e-06	7.93709e-41	4.25201e-40	[-1]	Group63	40.5405	15	[BARD1, BRCA1, HUS1, RAD17, RAD51, RAD9A, RBBP8, RFC2, RFC3, RFC5, RMI1, RPA2, RPA3, TOP3A, TOPBP1]
R-HSA:113510	E2F mediated regulation of DNA replication	REACTOME_Pathways_27.02.2019	0.000752793	0.00138012	7.93709e-41	4.25201e-40	[-1]	Group63	36.3636	8	[ORC1, ORC3, ORC4, ORC5, POLA2, PPP2CA, PPP2R1A, PRIM1]
KEGG:04110	Cell cycle	KEGG_27.02.2019	1.6406e-13	6.36325e-13	7.93709e-41	4.25201e-40	[-1]	Group63	33.871	42	[ANAPC1, ANAPC10, ANAPC11, ANAPC4, ANAPC5, BUB1B, BUB3, CCNA2, CCND1, CCNH, CDC16, CDC20, CDC23, CDC26, CDC45, CDC6, CDC7, CHEK1, CUL1, ESPL1, MAD2L1, MAD2L2, MCM2, MCM3, MCM4, MCM5, MCM6, MCM7, MYC, ORC1, ORC3, ORC4, ORC5, PCNA, PKMYT1, PLK1, RAD21, RBX1, SKP1, SMC3, WEE1, ZBTB17]
R-HSA:69275	G2/M Transition	REACTOME_Pathways_27.02.2019	8.64958e-28	1.01822e-26	7.09209e-36	3.54604e-35	[-1]	Group61	38.7755	76	[ACTR1A, CCNA2, CCNH, CCP110, CDK11A, CEP192, CKAP5, CUL1, DCTN2, DCTN3, DYNC1H1, DYNC1I2, FGFR1OP, HAUS1, HAUS3, HAUS4, HAUS5, HAUS8, MNAT1, MZT1, NEDD1, PAFAH1B1, PKMYT1, PLK1, PLK4, PPME1, PPP1R12A, PPP2CA, PPP2R1A, PSMA1, PSMA2, PSMA3, PSMA4, PSMA5, PSMA6, PSMA7, PSMB1, PSMB2, PSMB3, PSMB4, PSMB5, PSMB6, PSMB7, PSMC1, PSMC2, PSMC3, PSMC4, PSMC5, PSMC6, PSMD11, PSMD12, PSMD13, PSMD14, PSMD2, P…
R-HSA:453274	Mitotic G2-G2/M phases	REACTOME_Pathways_27.02.2019	1.886e-27	2.10918e-26	7.09209e-36	3.54604e-35	[-1]	Group61	38.3838	76	[ACTR1A, CCNA2, CCNH, CCP110, CDK11A, CEP192, CKAP5, CUL1, DCTN2, DCTN3, DYNC1H1, DYNC1I2, FGFR1OP, HAUS1, HAUS3, HAUS4, HAUS5, HAUS8, MNAT1, MZT1, NEDD1, PAFAH1B1, PKMYT1, PLK1, PLK4, PPME1, PPP1R12A, PPP2CA, PPP2R1A, PSMA1, PSMA2, PSMA3, PSMA4, PSMA5, PSMA6, PSMA7, PSMB1, PSMB2, PSMB3, PSMB4, PSMB5, PSMB6, PSMB7, PSMC1, PSMC2, PSMC3, PSMC4, PSMC5, PSMC6, PSMD11, PSMD12, PSMD13, PSMD14, PSMD2, P…
R-HSA:68877	Mitotic Prometaphase	REACTOME_Pathways_27.02.2019	1.28493e-22	1.07773e-21	7.09209e-36	3.54604e-35	[-1]	Group61	35	70	[ACTR1A, AHCTF1, AURKB, BIRC5, BUB1B, BUB3, CCP110, CDC20, CDCA8, CENPA, CENPE, CENPK, CEP192, CKAP5, CSNK2B, DCTN2, DCTN3, DSN1, DYNC1H1, DYNC1I2, FGFR1OP, HAUS1, HAUS3, HAUS4, HAUS5, HAUS8, INCENP, KIF18A, KNL1, MAD2L1, MIS12, MZT1, NCAPG, NCAPH, NEDD1, NSL1, NUDC, NUF2, NUP133, NUP160, NUP43, NUP85, NUP98, PAFAH1B1, PLK1, PLK4, PMF1, PPP2CA, PPP2R1A, RAD21, RANGAP1, SEC13, SEH1L, SGO1, SKA1, S…
R-HSA:380270	Recruitment of mitotic centrosome proteins and complexes	REACTOME_Pathways_27.02.2019	7.20848e-09	2.01537e-08	7.09209e-36	3.54604e-35	[-1]	Group61	32.9268	27	[ACTR1A, CCP110, CDK11A, CEP192, CKAP5, DCTN2, DCTN3, DYNC1H1, DYNC1I2, FGFR1OP, HAUS1, HAUS3, HAUS4, HAUS5, HAUS8, MZT1, NEDD1, PAFAH1B1, PLK1, PLK4, PPP2R1A, TUBB, TUBG1, TUBGCP2, TUBGCP3, TUBGCP5, TUBGCP6]
R-HSA:380287	Centrosome maturation	REACTOME_Pathways_27.02.2019	7.20848e-09	2.01537e-08	7.09209e-36	3.54604e-35	[-1]	Group61	32.9268	27	[ACTR1A, CCP110, CDK11A, CEP192, CKAP5, DCTN2, DCTN3, DYNC1H1, DYNC1I2, FGFR1OP, HAUS1, HAUS3, HAUS4, HAUS5, HAUS8, MZT1, NEDD1, PAFAH1B1, PLK1, PLK4, PPP2R1A, TUBB, TUBG1, TUBGCP2, TUBGCP3, TUBGCP5, TUBGCP6]
R-HSA:8854518	AURKA Activation by TPX2	REACTOME_Pathways_27.02.2019	9.96126e-07	2.3128e-06	7.09209e-36	3.54604e-35	[-1]	Group61	30.137	22	[ACTR1A, CCP110, CEP192, CKAP5, DCTN2, DCTN3, DYNC1H1, DYNC1I2, FGFR1OP, HAUS1, HAUS3, HAUS4, HAUS5, HAUS8, NEDD1, PAFAH1B1, PLK1, PLK4, PPP2R1A, TPX2, TUBB, TUBG1]
R-HSA:380259	Loss of Nlp from mitotic centrosomes	REACTOME_Pathways_27.02.2019	1.89983e-06	4.30672e-06	7.09209e-36	3.54604e-35	[-1]	Group61	30	21	[ACTR1A, CCP110, CEP192, CKAP5, DCTN2, DCTN3, DYNC1H1, DYNC1I2, FGFR1OP, HAUS1, HAUS3, HAUS4, HAUS5, HAUS8, NEDD1, PAFAH1B1, PLK1, PLK4, PPP2R1A, TUBB, TUBG1]
R-HSA:380284	Loss of proteins required for interphase microtubule organization from the centrosome	REACTOME_Pathways_27.02.2019	1.89983e-06	4.30672e-06	7.09209e-36	3.54604e-35	[-1]	Group61	30	21	[ACTR1A, CCP110, CEP192, CKAP5, DCTN2, DCTN3, DYNC1H1, DYNC1I2, FGFR1OP, HAUS1, HAUS3, HAUS4, HAUS5, HAUS8, NEDD1, PAFAH1B1, PLK1, PLK4, PPP2R1A, TUBB, TUBG1]
R-HSA:380320	Recruitment of NuMA to mitotic centrosomes	REACTOME_Pathways_27.02.2019	4.52951e-08	1.17802e-07	7.09209e-36	3.54604e-35	[-1]	Group61	29.7872	28	[ACTR1A, CCP110, CEP192, CKAP5, DCTN2, DCTN3, DYNC1H1, DYNC1I2, FGFR1OP, HAUS1, HAUS3, HAUS4, HAUS5, HAUS8, MZT1, NEDD1, PAFAH1B1, PLK1, PLK4, PPP2R1A, TUBA1C, TUBB, TUBB8, TUBG1, TUBGCP2, TUBGCP3, TUBGCP5, TUBGCP6]
R-HSA:2565942	Regulation of PLK1 Activity at G2/M Transition	REACTOME_Pathways_27.02.2019	6.42756e-07	1.52399e-06	7.09209e-36	3.54604e-35	[-1]	Group61	28.4091	25	[ACTR1A, CCP110, CEP192, CKAP5, CUL1, DCTN2, DCTN3, DYNC1H1, DYNC1I2, FGFR1OP, HAUS1, HAUS3, HAUS4, HAUS5, HAUS8, NEDD1, PAFAH1B1, PLK1, PLK4, PPP1R12A, PPP2R1A, SKP1, TUBB, TUBG1, UBC]
R-HSA:5620912	Anchoring of the basal body to the plasma membrane	REACTOME_Pathways_27.02.2019	0.000198259	0.000383377	7.09209e-36	3.54604e-35	[-1]	Group61	22.449	22	[ACTR1A, CCP110, CEP192, CEP97, CKAP5, DCTN2, DCTN3, DYNC1H1, DYNC1I2, FGFR1OP, HAUS1, HAUS3, HAUS4, HAUS5, HAUS8, NEDD1, PAFAH1B1, PLK1, PLK4, PPP2R1A, TUBB, TUBG1]
R-HSA:1592230	Mitochondrial biogenesis	REACTOME_Pathways_27.02.2019	0.000332436	0.000626587	7.09209e-36	3.54604e-35	[-1]	Group61	22.1053	21	[ATP5F1B, ATP5F1D, ATP5F1E, ATP5MC1, ATP5ME, ATP5PB, ATP5PO, CYCS, DNAJC11, GABPA, HDAC3, HSPA9, MICOS10, POLG2, POLRMT, PPARGC1B, PPRC1, SAMM50, SOD2, TFB2M, TWNK]
R-HSA:1852241	Organelle biogenesis and maintenance	REACTOME_Pathways_27.02.2019	6.16689e-06	1.35672e-05	7.09209e-36	3.54604e-35	[-1]	Group61	18.2432	54	[ACTR1A, ARF4, ATP5F1B, ATP5F1D, ATP5F1E, ATP5MC1, ATP5ME, ATP5PB, ATP5PO, CCP110, CCT2, CCT3, CCT4, CCT8, CEP192, CEP97, CKAP5, CYCS, DCTN2, DCTN3, DNAJC11, DYNC1H1, DYNC1I2, DYNLRB1, EXOC1, EXOC5, EXOC8, FGFR1OP, GABPA, HAUS1, HAUS3, HAUS4, HAUS5, HAUS8, HDAC3, HSPA9, MICOS10, NEDD1, PAFAH1B1, PLK1, PLK4, POLG2, POLRMT, PPARGC1B, PPP2R1A, PPRC1, SAMM50, SOD2, TFB2M, TUBA1C, TUBB, TUBB8, TUBG1, …
R-HSA:5617833	Cilium Assembly	REACTOME_Pathways_27.02.2019	0.00265082	0.00460802	7.09209e-36	3.54604e-35	[-1]	Group61	16.4179	33	[ACTR1A, ARF4, CCP110, CCT2, CCT3, CCT4, CCT8, CEP192, CEP97, CKAP5, DCTN2, DCTN3, DYNC1H1, DYNC1I2, DYNLRB1, EXOC1, EXOC5, EXOC8, FGFR1OP, HAUS1, HAUS3, HAUS4, HAUS5, HAUS8, NEDD1, PAFAH1B1, PLK1, PLK4, PPP2R1A, TUBA1C, TUBB, TUBB8, TUBG1]
R-HSA:77595	Processing of Intronless Pre-mRNAs	REACTOME_Pathways_27.02.2019	1.78081e-12	6.56553e-12	2.04825e-30	9.60115e-30	[-1]	Group55	78.9474	15	[CLP1, CPSF1, CPSF2, CPSF3, CPSF4, CSTF1, CSTF3, FIP1L1, NCBP1, NCBP2, NUDT21, PABPN1, PCF11, SYMPK, WDR33]
R-HSA:75067	Processing of Capped Intronless Pre-mRNA	REACTOME_Pathways_27.02.2019	1.70693e-13	6.54486e-13	2.04825e-30	9.60115e-30	[-1]	Group55	67.8571	19	[CLP1, CPSF1, CPSF2, CPSF3, CPSF4, CSTF1, CSTF3, FIP1L1, LSM10, LSM11, NCBP1, NCBP2, NUDT21, PABPN1, PCF11, SNRPD3, SNRPF, SYMPK, WDR33]
R-HSA:159231	Transport of Mature mRNA Derived from an Intronless Transcript	REACTOME_Pathways_27.02.2019	3.9022e-18	2.29682e-17	2.04825e-30	9.60115e-30	[-1]	Group55	65.8537	27	[CPSF1, CPSF2, CPSF3, CPSF4, FIP1L1, NCBP1, NCBP2, NDC1, NUP133, NUP153, NUP155, NUP160, NUP205, NUP214, NUP35, NUP43, NUP62, NUP85, NUP88, NUP98, NXF1, RAE1, SEC13, SEH1L, SYMPK, TPR, WDR33]
R-HSA:159234	Transport of Mature mRNAs Derived from Intronless Transcripts	REACTOME_Pathways_27.02.2019	9.917e-18	5.45435e-17	2.04825e-30	9.60115e-30	[-1]	Group55	64.2857	27	[CPSF1, CPSF2, CPSF3, CPSF4, FIP1L1, NCBP1, NCBP2, NDC1, NUP133, NUP153, NUP155, NUP160, NUP205, NUP214, NUP35, NUP43, NUP62, NUP85, NUP88, NUP98, NXF1, RAE1, SEC13, SEH1L, SYMPK, TPR, WDR33]
R-HSA:111367	SLBP independent Processing of Histone Pre-mRNAs	REACTOME_Pathways_27.02.2019	0.000129198	0.000254228	2.04825e-30	9.60115e-30	[-1]	Group55	60	6	[LSM10, LSM11, NCBP1, NCBP2, SNRPD3, SNRPF]
R-HSA:77588	SLBP Dependent Processing of Replication-Dependent Histone Pre-mRNAs	REACTOME_Pathways_27.02.2019	0.000260668	0.000498315	2.04825e-30	9.60115e-30	[-1]	Group55	54.5455	6	[LSM10, LSM11, NCBP1, NCBP2, SNRPD3, SNRPF]
R-HSA:72187	mRNA 3'-end processing	REACTOME_Pathways_27.02.2019	7.25442e-16	3.35705e-15	2.04825e-30	9.60115e-30	[-1]	Group55	51.7241	30	[CLP1, CPSF1, CPSF2, CPSF3, CPSF4, CSTF1, CSTF3, EIF4A3, FIP1L1, NCBP1, NCBP2, NUDT21, PABPN1, PCF11, RBM8A, SARNP, SLU7, SRRM1, SRSF1, SRSF2, SRSF3, SRSF6, SYMPK, THOC1, THOC3, THOC7, U2AF1, U2AF2, WDR33, ZC3H11A]
R-HSA:72202	Transport of Mature Transcript to Cytoplasm	REACTOME_Pathways_27.02.2019	6.07793e-22	4.7422e-21	2.04825e-30	9.60115e-30	[-1]	Group55	51.1905	43	[CPSF1, CPSF2, CPSF3, CPSF4, EIF4A3, FIP1L1, GLE1, NCBP1, NCBP2, NDC1, NUP133, NUP153, NUP155, NUP160, NUP205, NUP214, NUP35, NUP43, NUP62, NUP85, NUP88, NUP98, NXF1, RAE1, RBM8A, SARNP, SEC13, SEH1L, SLU7, SRRM1, SRSF1, SRSF2, SRSF3, SRSF6, SYMPK, THOC1, THOC3, THOC7, TPR, U2AF1, U2AF2, WDR33, ZC3H11A]
R-HSA:109688	Cleavage of Growing Transcript in the Termination Region	REACTOME_Pathways_27.02.2019	1.81321e-17	9.81182e-17	2.04825e-30	9.60115e-30	[-1]	Group55	50.7463	34	[CLP1, CPSF1, CPSF2, CPSF3, CPSF4, CSTF1, CSTF3, EIF4A3, FIP1L1, LSM10, LSM11, NCBP1, NCBP2, NUDT21, PABPN1, PCF11, RBM8A, SARNP, SLU7, SNRPD3, SNRPF, SRRM1, SRSF1, SRSF2, SRSF3, SRSF6, SYMPK, THOC1, THOC3, THOC7, U2AF1, U2AF2, WDR33, ZC3H11A]
R-HSA:73856	RNA Polymerase II Transcription Termination	REACTOME_Pathways_27.02.2019	1.81321e-17	9.81182e-17	2.04825e-30	9.60115e-30	[-1]	Group55	50.7463	34	[CLP1, CPSF1, CPSF2, CPSF3, CPSF4, CSTF1, CSTF3, EIF4A3, FIP1L1, LSM10, LSM11, NCBP1, NCBP2, NUDT21, PABPN1, PCF11, RBM8A, SARNP, SLU7, SNRPD3, SNRPF, SRRM1, SRSF1, SRSF2, SRSF3, SRSF6, SYMPK, THOC1, THOC3, THOC7, U2AF1, U2AF2, WDR33, ZC3H11A]
R-HSA:159236	Transport of Mature mRNA derived from an Intron-Containing Transcript	REACTOME_Pathways_27.02.2019	2.11089e-17	1.13313e-16	2.04825e-30	9.60115e-30	[-1]	Group55	48	36	[EIF4A3, GLE1, NCBP1, NCBP2, NDC1, NUP133, NUP153, NUP155, NUP160, NUP205, NUP214, NUP35, NUP43, NUP62, NUP85, NUP88, NUP98, NXF1, RAE1, RBM8A, SARNP, SEC13, SEH1L, SLU7, SRRM1, SRSF1, SRSF2, SRSF3, SRSF6, THOC1, THOC3, THOC7, TPR, U2AF1, U2AF2, ZC3H11A]
KEGG:03015	mRNA surveillance pathway	KEGG_27.02.2019	6.08663e-15	2.61803e-14	2.04825e-30	9.60115e-30	[-1]	Group55	40.6593	37	[ACIN1, CLP1, CPSF1, CPSF2, CPSF3, CPSF4, CPSF6, CSTF1, CSTF3, EIF4A3, ETF1, FIP1L1, GSPT1, NCBP1, NCBP2, NUDT21, NXF1, PABPC1, PABPN1, PCF11, PELO, PPP1CA, PPP2CA, PPP2R1A, PYM1, RBM8A, RNGTT, RNMT, SAP18, SMG1, SMG6, SRRM1, SYMPK, UPF1, UPF2, WDR33, WDR82]
R-HSA:141405	Inhibition of the proteolytic activity of APC/C required for the onset of anaphase by mitotic spindle checkpoint components	REACTOME_Pathways_27.02.2019	2.8702e-09	8.30132e-09	6.33816e-28	2.79625e-27	[-1]	Group52	65	13	[ANAPC1, ANAPC10, ANAPC11, ANAPC15, ANAPC4, ANAPC5, BUB1B, BUB3, CDC16, CDC20, CDC23, CDC26, MAD2L1]
R-HSA:141430	Inactivation of APC/C via direct inhibition of the APC/C complex	REACTOME_Pathways_27.02.2019	2.8702e-09	8.30132e-09	6.33816e-28	2.79625e-27	[-1]	Group52	65	13	[ANAPC1, ANAPC10, ANAPC11, ANAPC15, ANAPC4, ANAPC5, BUB1B, BUB3, CDC16, CDC20, CDC23, CDC26, MAD2L1]
R-HSA:69052	Switching of origins to a post-replicative state	REACTOME_Pathways_27.02.2019	8.72385e-37	2.43904e-35	6.33816e-28	2.79625e-27	[-1]	Group52	64.4444	58	[ANAPC1, ANAPC10, ANAPC11, ANAPC15, ANAPC4, ANAPC5, CCNA2, CDC16, CDC23, CDC26, CDC6, CDT1, CUL1, MCM2, MCM3, MCM4, MCM5, MCM6, MCM7, ORC1, ORC3, ORC4, ORC5, PSMA1, PSMA2, PSMA3, PSMA4, PSMA5, PSMA6, PSMA7, PSMB1, PSMB2, PSMB3, PSMB4, PSMB5, PSMB6, PSMB7, PSMC1, PSMC2, PSMC3, PSMC4, PSMC5, PSMC6, PSMD11, PSMD12, PSMD13, PSMD14, PSMD2, PSMD3, PSMD4, PSMD6, PSMD7, PSMD8, PSME1, RBX1, SEM1, SKP1, UB…
R-HSA:69306	DNA Replication	REACTOME_Pathways_27.02.2019	1.64756e-44	6.14175e-43	6.33816e-28	2.79625e-27	[-1]	Group52	59.8425	76	[ANAPC1, ANAPC10, ANAPC11, ANAPC15, ANAPC4, ANAPC5, CCNA2, CDC16, CDC23, CDC26, CDC45, CDC6, CDC7, CDT1, CUL1, FEN1, GINS1, GINS2, GINS3, MCM2, MCM3, MCM4, MCM5, MCM6, MCM7, ORC1, ORC3, ORC4, ORC5, PCNA, POLA2, POLD1, POLD2, POLD3, POLE2, PRIM1, PSMA1, PSMA2, PSMA3, PSMA4, PSMA5, PSMA6, PSMA7, PSMB1, PSMB2, PSMB3, PSMB4, PSMB5, PSMB6, PSMB7, PSMC1, PSMC2, PSMC3, PSMC4, PSMC5, PSMC6, PSMD11, PSMD1…
R-HSA:176187	Activation of ATR in response to replication stress	REACTOME_Pathways_27.02.2019	1.15713e-13	4.51417e-13	6.33816e-28	2.79625e-27	[-1]	Group52	59.4595	22	[CDC45, CDC6, CDC7, CHEK1, HUS1, MCM2, MCM3, MCM4, MCM5, MCM6, MCM7, ORC1, ORC3, ORC4, ORC5, RAD17, RAD9A, RFC2, RFC3, RFC5, RPA2, RPA3]
R-HSA:68962	Activation of the pre-replicative complex	REACTOME_Pathways_27.02.2019	1.25268e-11	4.35516e-11	6.33816e-28	2.79625e-27	[-1]	Group52	57.5758	19	[CDC45, CDC6, CDC7, CDT1, MCM2, MCM3, MCM4, MCM5, MCM6, MCM7, ORC1, ORC3, ORC4, ORC5, POLA2, POLE2, PRIM1, RPA2, RPA3]
R-HSA:179409	APC-Cdc20 mediated degradation of Nek2A	REACTOME_Pathways_27.02.2019	1.09305e-08	3.0059e-08	6.33816e-28	2.79625e-27	[-1]	Group52	56	14	[ANAPC1, ANAPC10, ANAPC11, ANAPC15, ANAPC4, ANAPC5, BUB1B, BUB3, CDC16, CDC20, CDC23, CDC26, MAD2L1, UBC]
R-HSA:69242	S Phase	REACTOME_Pathways_27.02.2019	1.17312e-41	4.14296e-40	6.33816e-28	2.79625e-27	[-1]	Group52	51.5528	83	[ANAPC1, ANAPC10, ANAPC11, ANAPC15, ANAPC4, ANAPC5, CCNA2, CCND1, CCNH, CDC16, CDC23, CDC26, CDC45, CDC6, CDT1, CUL1, FEN1, GINS1, GINS2, GINS3, MCM2, MCM3, MCM4, MCM5, MCM6, MCM7, MNAT1, MYC, ORC1, ORC3, ORC4, ORC5, PCNA, POLA2, POLD1, POLD2, POLD3, POLE2, PRIM1, PSMA1, PSMA2, PSMA3, PSMA4, PSMA5, PSMA6, PSMA7, PSMB1, PSMB2, PSMB3, PSMB4, PSMB5, PSMB6, PSMB7, PSMC1, PSMC2, PSMC3, PSMC4, PSMC5, P…
KEGG:04110	Cell cycle	KEGG_27.02.2019	1.6406e-13	6.36325e-13	6.33816e-28	2.79625e-27	[-1]	Group52	33.871	42	[ANAPC1, ANAPC10, ANAPC11, ANAPC4, ANAPC5, BUB1B, BUB3, CCNA2, CCND1, CCNH, CDC16, CDC20, CDC23, CDC26, CDC45, CDC6, CDC7, CHEK1, CUL1, ESPL1, MAD2L1, MAD2L2, MCM2, MCM3, MCM4, MCM5, MCM6, MCM7, MYC, ORC1, ORC3, ORC4, ORC5, PCNA, PKMYT1, PLK1, RAD21, RBX1, SKP1, SMC3, WEE1, ZBTB17]
KEGG:04114	Oocyte meiosis	KEGG_27.02.2019	0.00593946	0.00991387	6.33816e-28	2.79625e-27	[-1]	Group52	17.6	22	[ANAPC1, ANAPC10, ANAPC11, ANAPC4, ANAPC5, CDC16, CDC20, CDC23, CDC26, CUL1, ESPL1, MAD2L1, MAD2L2, PKMYT1, PLK1, PPP1CA, PPP2CA, PPP2R1A, RBX1, SGO1, SKP1, SMC3]
R-HSA:174184	Cdc20:Phospho-APC/C mediated degradation of Cyclin A	REACTOME_Pathways_27.02.2019	2.14191e-30	3.34238e-29	1.35846e-27	5.66025e-27	[-1]	Group67	65.2778	47	[ANAPC1, ANAPC10, ANAPC11, ANAPC15, ANAPC4, ANAPC5, BUB1B, BUB3, CCNA2, CDC16, CDC20, CDC23, CDC26, MAD2L1, PSMA1, PSMA2, PSMA3, PSMA4, PSMA5, PSMA6, PSMA7, PSMB1, PSMB2, PSMB3, PSMB4, PSMB5, PSMB6, PSMB7, PSMC1, PSMC2, PSMC3, PSMC4, PSMC5, PSMC6, PSMD11, PSMD12, PSMD13, PSMD14, PSMD2, PSMD3, PSMD4, PSMD6, PSMD7, PSMD8, PSME1, SEM1, UBC]
R-HSA:141405	Inhibition of the proteolytic activity of APC/C required for the onset of anaphase by mitotic spindle checkpoint components	REACTOME_Pathways_27.02.2019	2.8702e-09	8.30132e-09	1.35846e-27	5.66025e-27	[-1]	Group67	65	13	[ANAPC1, ANAPC10, ANAPC11, ANAPC15, ANAPC4, ANAPC5, BUB1B, BUB3, CDC16, CDC20, CDC23, CDC26, MAD2L1]
R-HSA:141430	Inactivation of APC/C via direct inhibition of the APC/C complex	REACTOME_Pathways_27.02.2019	2.8702e-09	8.30132e-09	1.35846e-27	5.66025e-27	[-1]	Group67	65	13	[ANAPC1, ANAPC10, ANAPC11, ANAPC15, ANAPC4, ANAPC5, BUB1B, BUB3, CDC16, CDC20, CDC23, CDC26, MAD2L1]
R-HSA:179419	APC:Cdc20 mediated degradation of cell cycle proteins prior to satisfation of the cell cycle checkpoint	REACTOME_Pathways_27.02.2019	5.45791e-30	8.13835e-29	1.35846e-27	5.66025e-27	[-1]	Group67	64.3836	47	[ANAPC1, ANAPC10, ANAPC11, ANAPC15, ANAPC4, ANAPC5, BUB1B, BUB3, CCNA2, CDC16, CDC20, CDC23, CDC26, MAD2L1, PSMA1, PSMA2, PSMA3, PSMA4, PSMA5, PSMA6, PSMA7, PSMB1, PSMB2, PSMB3, PSMB4, PSMB5, PSMB6, PSMB7, PSMC1, PSMC2, PSMC3, PSMC4, PSMC5, PSMC6, PSMD11, PSMD12, PSMD13, PSMD14, PSMD2, PSMD3, PSMD4, PSMD6, PSMD7, PSMD8, PSME1, SEM1, UBC]
R-HSA:176814	Activation of APC/C and APC/C:Cdc20 mediated degradation of mitotic proteins	REACTOME_Pathways_27.02.2019	4.93357e-30	7.5237e-29	1.35846e-27	5.66025e-27	[-1]	Group67	63.1579	48	[ANAPC1, ANAPC10, ANAPC11, ANAPC15, ANAPC4, ANAPC5, BUB1B, BUB3, CCNA2, CDC16, CDC20, CDC23, CDC26, MAD2L1, PLK1, PSMA1, PSMA2, PSMA3, PSMA4, PSMA5, PSMA6, PSMA7, PSMB1, PSMB2, PSMB3, PSMB4, PSMB5, PSMB6, PSMB7, PSMC1, PSMC2, PSMC3, PSMC4, PSMC5, PSMC6, PSMD11, PSMD12, PSMD13, PSMD14, PSMD2, PSMD3, PSMD4, PSMD6, PSMD7, PSMD8, PSME1, SEM1, UBC]
R-HSA:176409	APC/C:Cdc20 mediated degradation of mitotic proteins	REACTOME_Pathways_27.02.2019	3.30023e-29	4.61345e-28	1.35846e-27	5.66025e-27	[-1]	Group67	62.6667	47	[ANAPC1, ANAPC10, ANAPC11, ANAPC15, ANAPC4, ANAPC5, BUB1B, BUB3, CCNA2, CDC16, CDC20, CDC23, CDC26, MAD2L1, PSMA1, PSMA2, PSMA3, PSMA4, PSMA5, PSMA6, PSMA7, PSMB1, PSMB2, PSMB3, PSMB4, PSMB5, PSMB6, PSMB7, PSMC1, PSMC2, PSMC3, PSMC4, PSMC5, PSMC6, PSMD11, PSMD12, PSMD13, PSMD14, PSMD2, PSMD3, PSMD4, PSMD6, PSMD7, PSMD8, PSME1, SEM1, UBC]
R-HSA:176408	Regulation of APC/C activators between G1/S and early anaphase	REACTOME_Pathways_27.02.2019	6.4374e-31	1.13671e-29	1.35846e-27	5.66025e-27	[-1]	Group67	62.5	50	[ANAPC1, ANAPC10, ANAPC11, ANAPC15, ANAPC4, ANAPC5, BUB1B, BUB3, CCNA2, CDC16, CDC20, CDC23, CDC26, CUL1, MAD2L1, PLK1, PSMA1, PSMA2, PSMA3, PSMA4, PSMA5, PSMA6, PSMA7, PSMB1, PSMB2, PSMB3, PSMB4, PSMB5, PSMB6, PSMB7, PSMC1, PSMC2, PSMC3, PSMC4, PSMC5, PSMC6, PSMD11, PSMD12, PSMD13, PSMD14, PSMD2, PSMD3, PSMD4, PSMD6, PSMD7, PSMD8, PSME1, SEM1, SKP1, UBC]
R-HSA:174143	APC/C-mediated degradation of cell cycle proteins	REACTOME_Pathways_27.02.2019	6.36591e-30	9.28593e-29	1.35846e-27	5.66025e-27	[-1]	Group67	59.3023	51	[ANAPC1, ANAPC10, ANAPC11, ANAPC15, ANAPC4, ANAPC5, AURKB, BUB1B, BUB3, CCNA2, CDC16, CDC20, CDC23, CDC26, CUL1, MAD2L1, PLK1, PSMA1, PSMA2, PSMA3, PSMA4, PSMA5, PSMA6, PSMA7, PSMB1, PSMB2, PSMB3, PSMB4, PSMB5, PSMB6, PSMB7, PSMC1, PSMC2, PSMC3, PSMC4, PSMC5, PSMC6, PSMD11, PSMD12, PSMD13, PSMD14, PSMD2, PSMD3, PSMD4, PSMD6, PSMD7, PSMD8, PSME1, SEM1, SKP1, UBC]
R-HSA:453276	Regulation of mitotic cell cycle	REACTOME_Pathways_27.02.2019	6.36591e-30	9.28593e-29	1.35846e-27	5.66025e-27	[-1]	Group67	59.3023	51	[ANAPC1, ANAPC10, ANAPC11, ANAPC15, ANAPC4, ANAPC5, AURKB, BUB1B, BUB3, CCNA2, CDC16, CDC20, CDC23, CDC26, CUL1, MAD2L1, PLK1, PSMA1, PSMA2, PSMA3, PSMA4, PSMA5, PSMA6, PSMA7, PSMB1, PSMB2, PSMB3, PSMB4, PSMB5, PSMB6, PSMB7, PSMC1, PSMC2, PSMC3, PSMC4, PSMC5, PSMC6, PSMD11, PSMD12, PSMD13, PSMD14, PSMD2, PSMD3, PSMD4, PSMD6, PSMD7, PSMD8, PSME1, SEM1, SKP1, UBC]
R-HSA:179409	APC-Cdc20 mediated degradation of Nek2A	REACTOME_Pathways_27.02.2019	1.09305e-08	3.0059e-08	1.35846e-27	5.66025e-27	[-1]	Group67	56	14	[ANAPC1, ANAPC10, ANAPC11, ANAPC15, ANAPC4, ANAPC5, BUB1B, BUB3, CDC16, CDC20, CDC23, CDC26, MAD2L1, UBC]
R-HSA:176407	Conversion from APC/C:Cdc20 to APC/C:Cdh1 in late anaphase	REACTOME_Pathways_27.02.2019	3.15294e-06	7.05209e-06	1.35846e-27	5.66025e-27	[-1]	Group67	52.6316	10	[ANAPC1, ANAPC10, ANAPC11, ANAPC15, ANAPC4, ANAPC5, CDC16, CDC20, CDC23, CDC26]
R-HSA:176412	Phosphorylation of the APC/C	REACTOME_Pathways_27.02.2019	3.15294e-06	7.05209e-06	1.35846e-27	5.66025e-27	[-1]	Group67	52.6316	10	[ANAPC1, ANAPC10, ANAPC11, ANAPC15, ANAPC4, ANAPC5, CDC16, CDC23, CDC26, PLK1]
R-HSA:174048	APC/C:Cdc20 mediated degradation of Cyclin B	REACTOME_Pathways_27.02.2019	3.37263e-06	7.51839e-06	1.35846e-27	5.66025e-27	[-1]	Group67	47.8261	11	[ANAPC1, ANAPC10, ANAPC11, ANAPC15, ANAPC4, ANAPC5, CDC16, CDC20, CDC23, CDC26, UBC]
R-HSA:69618	Mitotic Spindle Checkpoint	REACTOME_Pathways_27.02.2019	6.724e-22	5.12705e-21	1.35846e-27	5.66025e-27	[-1]	Group67	44.6429	50	[AHCTF1, ANAPC1, ANAPC10, ANAPC11, ANAPC15, ANAPC4, ANAPC5, AURKB, BIRC5, BUB1B, BUB3, CDC16, CDC20, CDC23, CDC26, CDCA8, CENPA, CENPE, CENPK, CKAP5, DSN1, DYNC1H1, DYNC1I2, INCENP, KIF18A, KNL1, MAD2L1, MIS12, NSL1, NUDC, NUF2, NUP133, NUP160, NUP43, NUP85, NUP98, PAFAH1B1, PLK1, PMF1, PPP2CA, PPP2R1A, RANGAP1, SEC13, SEH1L, SGO1, SKA1, SPC24, SPC25, SPDL1, XPO1]
KEGG:04110	Cell cycle	KEGG_27.02.2019	1.6406e-13	6.36325e-13	1.35846e-27	5.66025e-27	[-1]	Group67	33.871	42	[ANAPC1, ANAPC10, ANAPC11, ANAPC4, ANAPC5, BUB1B, BUB3, CCNA2, CCND1, CCNH, CDC16, CDC20, CDC23, CDC26, CDC45, CDC6, CDC7, CHEK1, CUL1, ESPL1, MAD2L1, MAD2L2, MCM2, MCM3, MCM4, MCM5, MCM6, MCM7, MYC, ORC1, ORC3, ORC4, ORC5, PCNA, PKMYT1, PLK1, RAD21, RBX1, SKP1, SMC3, WEE1, ZBTB17]
KEGG:04120	Ubiquitin mediated proteolysis	KEGG_27.02.2019	0.00118211	0.00211519	1.35846e-27	5.66025e-27	[-1]	Group67	18.9781	26	[ANAPC1, ANAPC10, ANAPC11, ANAPC4, ANAPC5, BRCA1, CDC16, CDC20, CDC23, CDC26, CUL1, CUL3, DDB1, ELOB, PRPF19, RBX1, SAE1, SKP1, UBA2, UBA3, UBE2D3, UBE2I, UBE2M, UBE2N, UBR5, VHL]
R-HSA:2559582	Senescence-Associated Secretory Phenotype (SASP)	REACTOME_Pathways_27.02.2019	0.00565765	0.00949071	1.35846e-27	5.66025e-27	[-1]	Group67	18.1818	20	[ANAPC1, ANAPC10, ANAPC11, ANAPC15, ANAPC4, ANAPC5, CCNA2, CDC16, CDC23, CDC26, H2AFX, H2AFZ, H3F3A, HIST1H2BC, HIST1H2BJ, HIST1H2BL, HIST2H2AC, HIST2H2BE, HIST2H3D, UBC]
KEGG:04114	Oocyte meiosis	KEGG_27.02.2019	0.00593946	0.00991387	1.35846e-27	5.66025e-27	[-1]	Group67	17.6	22	[ANAPC1, ANAPC10, ANAPC11, ANAPC4, ANAPC5, CDC16, CDC20, CDC23, CDC26, CUL1, ESPL1, MAD2L1, MAD2L2, PKMYT1, PLK1, PPP1CA, PPP2CA, PPP2R1A, RBX1, SGO1, SKP1, SMC3]
R-HSA:162906	HIV Infection	REACTOME_Pathways_27.02.2019	1.67472e-48	8.64413e-47	3.15935e-26	1.24711e-25	[-1]	Group54	45.8333	110	[ATP6V1H, BANF1, CCNH, CCNK, CDK9, CHMP2A, CHMP5, CHMP6, CHMP7, CTDP1, ELL, ELOB, ERCC2, ERCC3, FEN1, GTF2A1, GTF2A2, GTF2B, GTF2E1, GTF2E2, GTF2F2, GTF2H1, GTF2H3, GTF2H4, HMGA1, MNAT1, NCBP1, NCBP2, NDC1, NELFA, NELFB, NELFE, NPM1, NUP133, NUP153, NUP155, NUP160, NUP205, NUP214, NUP35, NUP43, NUP62, NUP85, NUP88, NUP98, POLR2A, POLR2C, POLR2E, POLR2F, POLR2G, POLR2H, POLR2K, POLR2L, PPIA, PSMA1…
R-HSA:69481	G2/M Checkpoints	REACTOME_Pathways_27.02.2019	8.72419e-29	1.17079e-27	3.15935e-26	1.24711e-25	[-1]	Group54	42.2619	71	[BARD1, BRCA1, CDC45, CDC6, CDC7, CHEK1, H2AFX, HIST1H2BC, HIST1H2BJ, HIST1H2BL, HIST2H2BE, HUS1, MCM2, MCM3, MCM4, MCM5, MCM6, MCM7, ORC1, ORC3, ORC4, ORC5, PKMYT1, PSMA1, PSMA2, PSMA3, PSMA4, PSMA5, PSMA6, PSMA7, PSMB1, PSMB2, PSMB3, PSMB4, PSMB5, PSMB6, PSMB7, PSMC1, PSMC2, PSMC3, PSMC4, PSMC5, PSMC6, PSMD11, PSMD12, PSMD13, PSMD14, PSMD2, PSMD3, PSMD4, PSMD6, PSMD7, PSMD8, PSME1, RAD17, RAD9A…
R-HSA:3700989	Transcriptional Regulation by TP53	REACTOME_Pathways_27.02.2019	1.52356e-14	6.34974e-14	3.15935e-26	1.24711e-25	[-1]	Group54	23.224	85	[ARID3A, AURKB, BANP, BARD1, BIRC5, BRCA1, CCNA2, CCNH, CCNK, CDK9, CHD4, CHEK1, CNOT3, COX18, COX5A, COX5B, COX6C, COX7C, CSNK2B, CTDP1, CYCS, ELL, ELOB, ERCC2, ERCC3, GTF2F2, GTF2H1, GTF2H3, GTF2H4, HUS1, LAMTOR2, LAMTOR3, LAMTOR4, LRPPRC, MLST8, MNAT1, MTOR, NELFA, NELFB, NELFE, NOC2L, NPM1, PCNA, PDPK1, POLR2A, POLR2C, POLR2E, POLR2F, POLR2G, POLR2H, POLR2K, POLR2L, PPP2CA, PPP2R1A, PRMT1, PR…
R-HSA:8878171	Transcriptional regulation by RUNX1	REACTOME_Pathways_27.02.2019	8.74686e-09	2.42527e-08	3.15935e-26	1.24711e-25	[-1]	Group54	22.1757	53	[ACTL6A, CCND1, CCNH, CSNK2B, H2AFX, H2AFZ, H3F3A, HIST1H2BC, HIST1H2BJ, HIST1H2BL, HIST2H2AC, HIST2H2BE, HIST2H3D, MNAT1, PRMT1, PSMA1, PSMA2, PSMA3, PSMA4, PSMA5, PSMA6, PSMA7, PSMB1, PSMB2, PSMB3, PSMB4, PSMB5, PSMB6, PSMB7, PSMC1, PSMC2, PSMC3, PSMC4, PSMC5, PSMC6, PSMD11, PSMD12, PSMD13, PSMD14, PSMD2, PSMD3, PSMD4, PSMD6, PSMD7, PSMD8, PSME1, PTPN11, SEM1, SETD1A, SIN3A, SMARCB1, UBC, WDR5]
R-HSA:157118	Signaling by NOTCH	REACTOME_Pathways_27.02.2019	4.23799e-08	1.11517e-07	3.15935e-26	1.24711e-25	[-1]	Group54	21.7021	51	[ATP2A2, CCND1, CUL1, H2AFX, H2AFZ, H3F3A, HDAC3, HIST1H2BC, HIST1H2BJ, HIST1H2BL, HIST2H2AC, HIST2H2BE, HIST2H3D, MYC, PSMA1, PSMA2, PSMA3, PSMA4, PSMA5, PSMA6, PSMA7, PSMB1, PSMB2, PSMB3, PSMB4, PSMB5, PSMB6, PSMB7, PSMC1, PSMC2, PSMC3, PSMC4, PSMC5, PSMC6, PSMD11, PSMD12, PSMD13, PSMD14, PSMD2, PSMD3, PSMD4, PSMD6, PSMD7, PSMD8, PSME1, RBX1, SEM1, SKP1, SNW1, UBC, YBX1]
R-HSA:1257604	PIP3 activates AKT signaling	REACTOME_Pathways_27.02.2019	1.60474e-06	3.66252e-06	3.15935e-26	1.24711e-25	[-1]	Group54	19.3916	51	[CHD4, CSNK2B, GRB2, HDAC3, LAMTOR2, LAMTOR3, LAMTOR4, MKRN1, MLST8, MTOR, PDPK1, PPP2CA, PPP2R1A, PSMA1, PSMA2, PSMA3, PSMA4, PSMA5, PSMA6, PSMA7, PSMB1, PSMB2, PSMB3, PSMB4, PSMB5, PSMB6, PSMB7, PSMC1, PSMC2, PSMC3, PSMC4, PSMC5, PSMC6, PSMD11, PSMD12, PSMD13, PSMD14, PSMD2, PSMD3, PSMD4, PSMD6, PSMD7, PSMD8, PSME1, PTPN11, RBBP4, RCOR1, RPTOR, SEM1, UBC, USP7]
R-HSA:74160	Gene expression (Transcription)	REACTOME_Pathways_27.02.2019	6.91478e-31	1.1897e-29	3.15935e-26	1.24711e-25	[-1]	Group54	18.9281	279	[ACTB, ACTL6A, ARID3A, AURKB, BANP, BARD1, BDP1, BIRC5, BRCA1, BRF1, CCNA2, CCND1, CCNH, CCNK, CDC7, CDC73, CDK9, CHD4, CHEK1, CLP1, CNOT3, COX18, COX5A, COX5B, COX6C, COX7C, CPSF1, CPSF2, CPSF3, CPSF4, CRCP, CSNK2B, CSTF1, CSTF3, CTDP1, CTR9, CUL1, CYCS, DDX21, DICER1, EIF4A3, ELL, ELOB, ERCC2, ERCC3, FIP1L1, GTF2A1, GTF2A2, GTF2B, GTF2E1, GTF2E2, GTF2F2, GTF2H1, GTF2H3, GTF2H4, GTF3A, GTF3C1, G…
R-HSA:73857	RNA Polymerase II Transcription	REACTOME_Pathways_27.02.2019	4.8983e-19	3.01538e-18	3.15935e-26	1.24711e-25	[-1]	Group54	17.1664	229	[ACTL6A, ARID3A, AURKB, BANP, BARD1, BIRC5, BRCA1, CCNA2, CCND1, CCNH, CCNK, CDC7, CDC73, CDK9, CHD4, CHEK1, CLP1, CNOT3, COX18, COX5A, COX5B, COX6C, COX7C, CPSF1, CPSF2, CPSF3, CPSF4, CSNK2B, CSTF1, CSTF3, CTDP1, CTR9, CUL1, CYCS, EIF4A3, ELL, ELOB, ERCC2, ERCC3, FIP1L1, GTF2A1, GTF2A2, GTF2B, GTF2E1, GTF2E2, GTF2F2, GTF2H1, GTF2H3, GTF2H4, H2AFX, H2AFZ, H3F3A, HDAC3, HIST1H2BC, HIST1H2BJ, HIST1…
R-HSA:5663202	Diseases of signal transduction	REACTOME_Pathways_27.02.2019	7.51116e-06	1.63636e-05	3.15935e-26	1.24711e-25	[-1]	Group54	17.0103	66	[ACTB, ACTG1, CPSF6, CSNK1A1, CUL1, FGFR1OP, GRB2, GTF2F2, HDAC3, MLST8, MTOR, MYC, NCBP1, NCBP2, PDPK1, PHB, POLR2A, POLR2C, POLR2E, POLR2F, POLR2G, POLR2H, POLR2K, POLR2L, PPP2CA, PPP2R1A, PSMA1, PSMA2, PSMA3, PSMA4, PSMA5, PSMA6, PSMA7, PSMB1, PSMB2, PSMB3, PSMB4, PSMB5, PSMB6, PSMB7, PSMC1, PSMC2, PSMC3, PSMC4, PSMC5, PSMC6, PSMD11, PSMD12, PSMD13, PSMD14, PSMD2, PSMD3, PSMD4, PSMD6, PSMD7, P…
R-HSA:9006925	Intracellular signaling by second messengers	REACTOME_Pathways_27.02.2019	0.000118647	0.000235538	3.15935e-26	1.24711e-25	[-1]	Group54	16.7763	51	[CHD4, CSNK2B, GRB2, HDAC3, LAMTOR2, LAMTOR3, LAMTOR4, MKRN1, MLST8, MTOR, PDPK1, PPP2CA, PPP2R1A, PSMA1, PSMA2, PSMA3, PSMA4, PSMA5, PSMA6, PSMA7, PSMB1, PSMB2, PSMB3, PSMB4, PSMB5, PSMB6, PSMB7, PSMC1, PSMC2, PSMC3, PSMC4, PSMC5, PSMC6, PSMD11, PSMD12, PSMD13, PSMD14, PSMD2, PSMD3, PSMD4, PSMD6, PSMD7, PSMD8, PSME1, PTPN11, RBBP4, RCOR1, RPTOR, SEM1, UBC, USP7]
R-HSA:212436	Generic Transcription Pathway	REACTOME_Pathways_27.02.2019	4.0254e-06	8.94386e-06	3.15935e-26	1.24711e-25	[-1]	Group54	13.7077	166	[ACTL6A, ARID3A, AURKB, BANP, BARD1, BIRC5, BRCA1, CCNA2, CCND1, CCNH, CCNK, CDC7, CDK9, CHD4, CHEK1, CNOT3, COX18, COX5A, COX5B, COX6C, COX7C, CSNK2B, CTDP1, CUL1, CYCS, ELL, ELOB, ERCC2, ERCC3, GTF2F2, GTF2H1, GTF2H3, GTF2H4, H2AFX, H2AFZ, H3F3A, HDAC3, HIST1H2BC, HIST1H2BJ, HIST1H2BL, HIST2H2AC, HIST2H2BE, HIST2H3D, HSPD1, HUS1, LAMTOR2, LAMTOR3, LAMTOR4, LRPPRC, MED10, MED17, MED20, MED26, ME…
KEGG:05170	Human immunodeficiency virus 1 infection	KEGG_27.02.2019	0.0194087	0.030643	5.30016e-23	1.98756e-22	[-1]	Group59	5.18868	11	[CHEK1, CUL1, CYCS, DDB1, ELOB, MTOR, PTK2, RAC3, RBX1, SKP1, WEE1]
KEGG:04510	Focal adhesion	KEGG_27.02.2019	0.0214707	0.0334266	5.30016e-23	1.98756e-22	[-1]	Group59	5.02513	10	[ACTB, ACTG1, CCND1, GRB2, PDPK1, PPP1CA, PPP1R12A, PTK2, RAC3, TLN1]
KEGG:04151	PI3K-Akt signaling pathway	KEGG_27.02.2019	5.45186e-05	0.000110187	5.30016e-23	1.98756e-22	[-1]	Group59	3.9548	14	[ATF4, BRCA1, CCND1, GRB2, HSP90B1, MLST8, MTOR, MYC, PDPK1, PPP2CA, PPP2R1A, PTK2, RPS6, RPTOR]
KEGG:05200	Pathways in cancer	KEGG_27.02.2019	1.82164e-07	4.52711e-07	5.30016e-23	1.98756e-22	[-1]	Group59	3.77358	20	[BIRC5, BRCA2, CCND1, CUL1, CYCS, EGLN2, ELOB, GRB2, HSP90B1, MTOR, MYC, PTK2, RAC3, RAD51, RBX1, SKP1, STAT5A, TPR, VHL, ZBTB17]
KEGG:04630	JAK-STAT signaling pathway	KEGG_27.02.2019	0.0050114	0.00853465	5.30016e-23	1.98756e-22	[-1]	Group59	3.7037	6	[CCND1, GRB2, MTOR, MYC, PTPN11, STAT5A]
R-HSA:6785807	Interleukin-4 and Interleukin-13 signaling	REACTOME_Pathways_27.02.2019	0.0326275	0.0485434	5.30016e-23	1.98756e-22	[-1]	Group59	3.7037	4	[BIRC5, CCND1, HSP90B1, MYC]
KEGG:04371	Apelin signaling pathway	KEGG_27.02.2019	0.0129071	0.020869	5.30016e-23	1.98756e-22	[-1]	Group59	3.64964	5	[CCND1, MTOR, PIK3C3, PIK3R4, RPS6]
KEGG:05163	Human cytomegalovirus infection	KEGG_27.02.2019	0.000601041	0.00111408	5.30016e-23	1.98756e-22	[-1]	Group59	3.55556	8	[ATF4, CCND1, CYCS, GRB2, MTOR, MYC, PTK2, RAC3]
KEGG:05226	Gastric cancer	KEGG_27.02.2019	0.00502728	0.00854002	5.30016e-23	1.98756e-22	[-1]	Group59	3.3557	5	[CCND1, CSNK1A1, GRB2, MTOR, MYC]
KEGG:05206	MicroRNAs in cancer	KEGG_27.02.2019	7.46067e-06	1.63065e-05	5.30016e-23	1.98756e-22	[-1]	Group59	3.01003	9	[BRCA1, CCND1, DICER1, GRB2, HNRNPK, MTOR, MYC, RPTOR, UBE2I]
KEGG:04072	Phospholipase D signaling pathway	KEGG_27.02.2019	0.00185936	0.00328323	5.30016e-23	1.98756e-22	[-1]	Group59	2.7027	4	[DNM2, GRB2, MTOR, PTPN11]
KEGG:05167	Kaposi sarcoma-associated herpesvirus infection	KEGG_27.02.2019	0.000264102	0.000503444	5.30016e-23	1.98756e-22	[-1]	Group59	2.68817	5	[CCND1, CYCS, MTOR, MYC, PIK3C3]
KEGG:04010	MAPK signaling pathway	KEGG_27.02.2019	7.70577e-07	1.82062e-06	5.30016e-23	1.98756e-22	[-1]	Group59	2.37288	7	[ATF4, CACNB3, GRB2, LAMTOR3, MYC, RAC3, SRF]
R-HSA:6781823	Formation of TC-NER Pre-Incision Complex	REACTOME_Pathways_27.02.2019	5.87887e-16	2.73939e-15	8.59955e-23	3.07127e-22	[-1]	Group57	53.7037	29	[CCNH, COPS2, COPS3, COPS4, COPS5, COPS6, COPS8, DDB1, ERCC2, ERCC3, GPS1, GTF2H1, GTF2H3, GTF2H4, ISY1, MNAT1, POLR2A, POLR2C, POLR2E, POLR2F, POLR2G, POLR2H, POLR2K, POLR2L, PRPF19, RBX1, UBC, USP7, ZNF830]
R-HSA:6781827	Transcription-Coupled Nucleotide Excision Repair (TC-NER)	REACTOME_Pathways_27.02.2019	2.83525e-20	1.86515e-19	8.59955e-23	3.07127e-22	[-1]	Group57	50.6329	40	[CCNH, COPS2, COPS3, COPS4, COPS5, COPS6, COPS8, DDB1, ELL, ERCC2, ERCC3, GPS1, GTF2H1, GTF2H3, GTF2H4, ISY1, MNAT1, PCNA, POLD1, POLD2, POLD3, POLE2, POLR2A, POLR2C, POLR2E, POLR2F, POLR2G, POLR2H, POLR2K, POLR2L, PRPF19, RBX1, RFC2, RFC3, RFC5, RPA2, RPA3, UBC, USP7, ZNF830]
R-HSA:6782210	Gap-filling DNA repair synthesis and ligation in TC-NER	REACTOME_Pathways_27.02.2019	5.0576e-16	2.37318e-15	8.59955e-23	3.07127e-22	[-1]	Group57	49.2308	32	[CCNH, DDB1, ERCC2, ERCC3, GTF2H1, GTF2H3, GTF2H4, ISY1, MNAT1, PCNA, POLD1, POLD2, POLD3, POLE2, POLR2A, POLR2C, POLR2E, POLR2F, POLR2G, POLR2H, POLR2K, POLR2L, PRPF19, RBX1, RFC2, RFC3, RFC5, RPA2, RPA3, UBC, USP7, ZNF830]
R-HSA:6782135	Dual incision in TC-NER	REACTOME_Pathways_27.02.2019	8.90943e-16	4.09468e-15	8.59955e-23	3.07127e-22	[-1]	Group57	48.4848	32	[CCNH, DDB1, ERCC2, ERCC3, GTF2H1, GTF2H3, GTF2H4, ISY1, MNAT1, PCNA, POLD1, POLD2, POLD3, POLE2, POLR2A, POLR2C, POLR2E, POLR2F, POLR2G, POLR2H, POLR2K, POLR2L, PRPF19, RBX1, RFC2, RFC3, RFC5, RPA2, RPA3, UBC, USP7, ZNF830]
R-HSA:5696398	Nucleotide Excision Repair	REACTOME_Pathways_27.02.2019	3.1805e-21	2.34518e-20	8.59955e-23	3.07127e-22	[-1]	Group57	44.1441	49	[ACTB, ACTL6A, ACTR8, CCNH, COPS2, COPS3, COPS4, COPS5, COPS6, COPS8, DDB1, ELL, ERCC2, ERCC3, GPS1, GTF2H1, GTF2H3, GTF2H4, INO80, ISY1, MNAT1, PCNA, POLD1, POLD2, POLD3, POLE2, POLR2A, POLR2C, POLR2E, POLR2F, POLR2G, POLR2H, POLR2K, POLR2L, PRPF19, RBX1, RFC2, RFC3, RFC5, RPA2, RPA3, RUVBL1, SUMO2, UBC, UBE2I, UBE2N, USP7, YY1, ZNF830]
R-HSA:5696399	Global Genome Nucleotide Excision Repair (GG-NER)	REACTOME_Pathways_27.02.2019	1.93269e-15	8.58829e-15	8.59955e-23	3.07127e-22	[-1]	Group57	42.8571	36	[ACTB, ACTL6A, ACTR8, CCNH, COPS2, COPS3, COPS4, COPS5, COPS6, COPS8, DDB1, ERCC2, ERCC3, GPS1, GTF2H1, GTF2H3, GTF2H4, INO80, MNAT1, PCNA, POLD1, POLD2, POLD3, POLE2, RBX1, RFC2, RFC3, RFC5, RPA2, RPA3, RUVBL1, SUMO2, UBC, UBE2I, UBE2N, YY1]
R-HSA:5685942	HDR through Homologous Recombination (HRR)	REACTOME_Pathways_27.02.2019	3.66728e-11	1.24911e-10	8.59955e-23	3.07127e-22	[-1]	Group57	40.2985	27	[BARD1, BRCA1, BRCA2, CHEK1, HUS1, PCNA, POLD1, POLD2, POLD3, POLE2, RAD17, RAD51, RAD51C, RAD51D, RAD9A, RBBP8, RFC2, RFC3, RFC5, RMI1, RPA2, RPA3, TOP3A, TOPBP1, UBC, XRCC2, XRCC3]
R-HSA:5693567	HDR through Homologous Recombination (HRR) or Single Strand Annealing (SSA)	REACTOME_Pathways_27.02.2019	1.79103e-12	6.56711e-12	8.59955e-23	3.07127e-22	[-1]	Group57	31.8182	42	[BARD1, BRCA1, BRCA2, CCNA2, CHEK1, H2AFX, HIST1H2BC, HIST1H2BJ, HIST1H2BL, HIST2H2BE, HUS1, PCNA, POLD1, POLD2, POLD3, POLE2, PPP4C, PPP4R2, RAD17, RAD51, RAD51C, RAD51D, RAD9A, RBBP8, RFC2, RFC3, RFC5, RMI1, RNF168, RNF4, RNF8, RPA2, RPA3, SUMO2, TIPIN, TOP3A, TOPBP1, UBC, UBE2I, UBE2N, XRCC2, XRCC3]
R-HSA:5693607	Processing of DNA double-strand break ends	REACTOME_Pathways_27.02.2019	1.708e-09	5.09363e-09	8.59955e-23	3.07127e-22	[-1]	Group57	31.6327	31	[BARD1, BRCA1, CCNA2, CHEK1, H2AFX, HIST1H2BC, HIST1H2BJ, HIST1H2BL, HIST2H2BE, HUS1, PPP4C, PPP4R2, RAD17, RAD9A, RBBP8, RFC2, RFC3, RFC5, RMI1, RNF168, RNF4, RNF8, RPA2, RPA3, SUMO2, TIPIN, TOP3A, TOPBP1, UBC, UBE2I, UBE2N]
R-HSA:5693538	Homology Directed Repair	REACTOME_Pathways_27.02.2019	2.16143e-12	7.83957e-12	8.59955e-23	3.07127e-22	[-1]	Group57	31.1594	43	[BARD1, BRCA1, BRCA2, CCNA2, CHEK1, FEN1, H2AFX, HIST1H2BC, HIST1H2BJ, HIST1H2BL, HIST2H2BE, HUS1, PCNA, POLD1, POLD2, POLD3, POLE2, PPP4C, PPP4R2, RAD17, RAD51, RAD51C, RAD51D, RAD9A, RBBP8, RFC2, RFC3, RFC5, RMI1, RNF168, RNF4, RNF8, RPA2, RPA3, SUMO2, TIPIN, TOP3A, TOPBP1, UBC, UBE2I, UBE2N, XRCC2, XRCC3]
R-HSA:73894	DNA Repair	REACTOME_Pathways_27.02.2019	8.59955e-23	7.39782e-22	8.59955e-23	3.07127e-22	[-1]	Group57	29.1139	92	[ACTB, ACTL6A, ACTR8, BAP1, BARD1, BRCA1, BRCA2, CCNA2, CCNH, CHEK1, COPS2, COPS3, COPS4, COPS5, COPS6, COPS8, DCLRE1B, DDB1, DTL, ELL, ERCC2, ERCC3, FEN1, GPS1, GTF2H1, GTF2H3, GTF2H4, H2AFX, HIST1H2BC, HIST1H2BJ, HIST1H2BL, HIST2H2BE, HUS1, INO80, ISY1, MAD2L2, MNAT1, NPLOC4, PCNA, PNKP, POLD1, POLD2, POLD3, POLE2, POLR2A, POLR2C, POLR2E, POLR2F, POLR2G, POLR2H, POLR2K, POLR2L, PPP4C, PPP4R2, P…
R-HSA:5693532	DNA Double-Strand Break Repair	REACTOME_Pathways_27.02.2019	3.56931e-11	1.22194e-10	8.59955e-23	3.07127e-22	[-1]	Group57	27.7108	46	[BAP1, BARD1, BRCA1, BRCA2, CCNA2, CHEK1, FEN1, H2AFX, HIST1H2BC, HIST1H2BJ, HIST1H2BL, HIST2H2BE, HUS1, PCNA, POLD1, POLD2, POLD3, POLE2, PPP4C, PPP4R2, RAD17, RAD51, RAD51C, RAD51D, RAD9A, RBBP8, RFC2, RFC3, RFC5, RMI1, RNF168, RNF4, RNF8, RPA2, RPA3, SUMO2, TIPIN, TOP3A, TOPBP1, UBC, UBE2I, UBE2N, XRCC2, XRCC3, XRCC5, XRCC6]
R-HSA:141405	Inhibition of the proteolytic activity of APC/C required for the onset of anaphase by mitotic spindle checkpoint components	REACTOME_Pathways_27.02.2019	2.8702e-09	8.30132e-09	1.83112e-20	6.24246e-20	[-1]	Group64	65	13	[ANAPC1, ANAPC10, ANAPC11, ANAPC15, ANAPC4, ANAPC5, BUB1B, BUB3, CDC16, CDC20, CDC23, CDC26, MAD2L1]
R-HSA:141430	Inactivation of APC/C via direct inhibition of the APC/C complex	REACTOME_Pathways_27.02.2019	2.8702e-09	8.30132e-09	1.83112e-20	6.24246e-20	[-1]	Group64	65	13	[ANAPC1, ANAPC10, ANAPC11, ANAPC15, ANAPC4, ANAPC5, BUB1B, BUB3, CDC16, CDC20, CDC23, CDC26, MAD2L1]
R-HSA:179409	APC-Cdc20 mediated degradation of Nek2A	REACTOME_Pathways_27.02.2019	1.09305e-08	3.0059e-08	1.83112e-20	6.24246e-20	[-1]	Group64	56	14	[ANAPC1, ANAPC10, ANAPC11, ANAPC15, ANAPC4, ANAPC5, BUB1B, BUB3, CDC16, CDC20, CDC23, CDC26, MAD2L1, UBC]
R-HSA:176407	Conversion from APC/C:Cdc20 to APC/C:Cdh1 in late anaphase	REACTOME_Pathways_27.02.2019	3.15294e-06	7.05209e-06	1.83112e-20	6.24246e-20	[-1]	Group64	52.6316	10	[ANAPC1, ANAPC10, ANAPC11, ANAPC15, ANAPC4, ANAPC5, CDC16, CDC20, CDC23, CDC26]
R-HSA:176412	Phosphorylation of the APC/C	REACTOME_Pathways_27.02.2019	3.15294e-06	7.05209e-06	1.83112e-20	6.24246e-20	[-1]	Group64	52.6316	10	[ANAPC1, ANAPC10, ANAPC11, ANAPC15, ANAPC4, ANAPC5, CDC16, CDC23, CDC26, PLK1]
R-HSA:174048	APC/C:Cdc20 mediated degradation of Cyclin B	REACTOME_Pathways_27.02.2019	3.37263e-06	7.51839e-06	1.83112e-20	6.24246e-20	[-1]	Group64	47.8261	11	[ANAPC1, ANAPC10, ANAPC11, ANAPC15, ANAPC4, ANAPC5, CDC16, CDC20, CDC23, CDC26, UBC]
R-HSA:5250924	B-WICH complex positively regulates rRNA expression	REACTOME_Pathways_27.02.2019	3.40594e-07	8.22081e-07	1.83112e-20	6.24246e-20	[-1]	Group64	28.5714	26	[ACTB, DDX21, H2AFX, H2AFZ, H3F3A, HIST1H2BC, HIST1H2BJ, HIST1H2BL, HIST2H2AC, HIST2H2BE, HIST2H3D, MYBBP1A, POLR1A, POLR1B, POLR1C, POLR1E, POLR2E, POLR2F, POLR2H, POLR2K, POLR2L, TAF1B, TAF1C, TBP, TWISTNB, ZNRD1]
R-HSA:68875	Mitotic Prophase	REACTOME_Pathways_27.02.2019	1.83107e-08	4.93433e-08	1.83112e-20	6.24246e-20	[-1]	Group64	26.0563	37	[BANF1, H2AFX, H2AFZ, H3F3A, HIST1H2BC, HIST1H2BJ, HIST1H2BL, HIST2H2AC, HIST2H2BE, HIST2H3D, MASTL, NCAPD3, NCAPG2, NCAPH2, NDC1, NUP133, NUP153, NUP155, NUP160, NUP205, NUP214, NUP35, NUP43, NUP62, NUP85, NUP88, NUP98, PLK1, PPP2CA, PPP2R1A, RAE1, SEC13, SEH1L, SET, SMC2, SMC4, TPR]
R-HSA:606279	Deposition of new CENPA-containing nucleosomes at the centromere	REACTOME_Pathways_27.02.2019	0.00021349	0.000411644	1.83112e-20	6.24246e-20	[-1]	Group64	24.3243	18	[CENPA, CENPK, CENPW, H2AFX, H2AFZ, HIST1H2BC, HIST1H2BJ, HIST1H2BL, HIST2H2AC, HIST2H2BE, HJURP, KNL1, MIS18A, MIS18BP1, NPM1, OIP5, RBBP4, RUVBL1]
R-HSA:774815	Nucleosome assembly	REACTOME_Pathways_27.02.2019	0.00021349	0.000411644	1.83112e-20	6.24246e-20	[-1]	Group64	24.3243	18	[CENPA, CENPK, CENPW, H2AFX, H2AFZ, HIST1H2BC, HIST1H2BJ, HIST1H2BL, HIST2H2AC, HIST2H2BE, HJURP, KNL1, MIS18A, MIS18BP1, NPM1, OIP5, RBBP4, RUVBL1]
R-HSA:2299718	Condensation of Prophase Chromosomes	REACTOME_Pathways_27.02.2019	0.00230544	0.00403904	1.83112e-20	6.24246e-20	[-1]	Group64	21.6216	16	[H2AFX, H2AFZ, H3F3A, HIST1H2BC, HIST1H2BJ, HIST1H2BL, HIST2H2AC, HIST2H2BE, HIST2H3D, NCAPD3, NCAPG2, NCAPH2, PLK1, SET, SMC2, SMC4]
R-HSA:912446	Meiotic recombination	REACTOME_Pathways_27.02.2019	0.00508474	0.00859411	1.83112e-20	6.24246e-20	[-1]	Group64	19.7674	17	[BRCA1, BRCA2, H2AFX, H2AFZ, H3F3A, HIST1H2BC, HIST1H2BJ, HIST1H2BL, HIST2H2AC, HIST2H2BE, HIST2H3D, RAD51, RAD51C, RBBP8, RPA2, RPA3, TOP3A]
R-HSA:1500620	Meiosis	REACTOME_Pathways_27.02.2019	0.0027312	0.00473549	1.83112e-20	6.24246e-20	[-1]	Group64	18.6441	22	[ACD, BRCA1, BRCA2, H2AFX, H2AFZ, H3F3A, HIST1H2BC, HIST1H2BJ, HIST1H2BL, HIST2H2AC, HIST2H2BE, HIST2H3D, RAD21, RAD51, RAD51C, RBBP8, RPA2, RPA3, SMC3, TINF2, TOP3A, UBE2I]
R-HSA:2559582	Senescence-Associated Secretory Phenotype (SASP)	REACTOME_Pathways_27.02.2019	0.00565765	0.00949071	1.83112e-20	6.24246e-20	[-1]	Group64	18.1818	20	[ANAPC1, ANAPC10, ANAPC11, ANAPC15, ANAPC4, ANAPC5, CCNA2, CDC16, CDC23, CDC26, H2AFX, H2AFZ, H3F3A, HIST1H2BC, HIST1H2BJ, HIST1H2BL, HIST2H2AC, HIST2H2BE, HIST2H3D, UBC]
R-HSA:5617472	Activation of anterior HOX genes in hindbrain development during early embryogenesis	REACTOME_Pathways_27.02.2019	0.00505856	0.00857145	1.83112e-20	6.24246e-20	[-1]	Group64	18.0328	22	[CTCF, H2AFX, H2AFZ, H3F3A, HDAC3, HIST1H2BC, HIST1H2BJ, HIST1H2BL, HIST2H2AC, HIST2H2BE, HIST2H3D, POLR2A, POLR2C, POLR2E, POLR2F, POLR2G, POLR2H, POLR2K, POLR2L, RBBP4, WDR5, YY1]
R-HSA:5619507	Activation of HOX genes during differentiation	REACTOME_Pathways_27.02.2019	0.00505856	0.00857145	1.83112e-20	6.24246e-20	[-1]	Group64	18.0328	22	[CTCF, H2AFX, H2AFZ, H3F3A, HDAC3, HIST1H2BC, HIST1H2BJ, HIST1H2BL, HIST2H2AC, HIST2H2BE, HIST2H3D, POLR2A, POLR2C, POLR2E, POLR2F, POLR2G, POLR2H, POLR2K, POLR2L, RBBP4, WDR5, YY1]
R-HSA:1474165	Reproduction	REACTOME_Pathways_27.02.2019	0.0332982	0.0493225	1.83112e-20	6.24246e-20	[-1]	Group64	15.2778	22	[ACD, BRCA1, BRCA2, H2AFX, H2AFZ, H3F3A, HIST1H2BC, HIST1H2BJ, HIST1H2BL, HIST2H2AC, HIST2H2BE, HIST2H3D, RAD21, RAD51, RAD51C, RBBP8, RPA2, RPA3, SMC3, TINF2, TOP3A, UBE2I]
R-HSA:167152	Formation of HIV elongation complex in the absence of HIV Tat	REACTOME_Pathways_27.02.2019	7.2138e-18	4.10208e-17	5.14255e-19	1.67692e-18	[-1]	Group62	60.4167	29	[CCNH, CCNK, CDK9, CTDP1, ELL, ELOB, ERCC2, ERCC3, GTF2F2, GTF2H1, GTF2H3, GTF2H4, MNAT1, NCBP1, NCBP2, NELFA, NELFB, NELFE, POLR2A, POLR2C, POLR2E, POLR2F, POLR2G, POLR2H, POLR2K, POLR2L, SSRP1, SUPT16H, SUPT5H]
R-HSA:167169	HIV Transcription Elongation	REACTOME_Pathways_27.02.2019	4.55451e-17	2.36905e-16	5.14255e-19	1.67692e-18	[-1]	Group62	59.5745	28	[CCNH, CDK9, CTDP1, ELL, ELOB, ERCC2, ERCC3, GTF2F2, GTF2H1, GTF2H3, GTF2H4, MNAT1, NCBP1, NCBP2, NELFA, NELFB, NELFE, POLR2A, POLR2C, POLR2E, POLR2F, POLR2G, POLR2H, POLR2K, POLR2L, SSRP1, SUPT16H, SUPT5H]
R-HSA:167200	Formation of HIV-1 elongation complex containing HIV-1 Tat	REACTOME_Pathways_27.02.2019	4.55451e-17	2.36905e-16	5.14255e-19	1.67692e-18	[-1]	Group62	59.5745	28	[CCNH, CDK9, CTDP1, ELL, ELOB, ERCC2, ERCC3, GTF2F2, GTF2H1, GTF2H3, GTF2H4, MNAT1, NCBP1, NCBP2, NELFA, NELFB, NELFE, POLR2A, POLR2C, POLR2E, POLR2F, POLR2G, POLR2H, POLR2K, POLR2L, SSRP1, SUPT16H, SUPT5H]
R-HSA:167246	Tat-mediated elongation of the HIV-1 transcript	REACTOME_Pathways_27.02.2019	4.55451e-17	2.36905e-16	5.14255e-19	1.67692e-18	[-1]	Group62	59.5745	28	[CCNH, CDK9, CTDP1, ELL, ELOB, ERCC2, ERCC3, GTF2F2, GTF2H1, GTF2H3, GTF2H4, MNAT1, NCBP1, NCBP2, NELFA, NELFB, NELFE, POLR2A, POLR2C, POLR2E, POLR2F, POLR2G, POLR2H, POLR2K, POLR2L, SSRP1, SUPT16H, SUPT5H]
R-HSA:167172	Transcription of the HIV genome	REACTOME_Pathways_27.02.2019	1.02126e-22	8.67428e-22	5.14255e-19	1.67692e-18	[-1]	Group62	55.4054	41	[CCNH, CCNK, CDK9, CTDP1, ELL, ELOB, ERCC2, ERCC3, GTF2A1, GTF2A2, GTF2B, GTF2E1, GTF2E2, GTF2F2, GTF2H1, GTF2H3, GTF2H4, MNAT1, NCBP1, NCBP2, NELFA, NELFB, NELFE, POLR2A, POLR2C, POLR2E, POLR2F, POLR2G, POLR2H, POLR2K, POLR2L, RNGTT, RNMT, SSRP1, SUPT16H, SUPT5H, TAF10, TAF5, TAF6, TAF7, TBP]
R-HSA:112382	Formation of RNA Pol II elongation complex	REACTOME_Pathways_27.02.2019	4.50733e-17	2.36282e-16	5.14255e-19	1.67692e-18	[-1]	Group62	52.459	32	[CCNH, CCNK, CDC73, CDK9, CTDP1, CTR9, ELL, ELOB, ERCC2, ERCC3, GTF2F2, GTF2H1, GTF2H3, GTF2H4, MNAT1, NCBP1, NCBP2, NELFA, NELFB, NELFE, POLR2A, POLR2C, POLR2E, POLR2F, POLR2G, POLR2H, POLR2K, POLR2L, RTF1, SSRP1, SUPT16H, SUPT5H]
R-HSA:75955	RNA Polymerase II Transcription Elongation	REACTOME_Pathways_27.02.2019	4.50733e-17	2.36282e-16	5.14255e-19	1.67692e-18	[-1]	Group62	52.459	32	[CCNH, CCNK, CDC73, CDK9, CTDP1, CTR9, ELL, ELOB, ERCC2, ERCC3, GTF2F2, GTF2H1, GTF2H3, GTF2H4, MNAT1, NCBP1, NCBP2, NELFA, NELFB, NELFE, POLR2A, POLR2C, POLR2E, POLR2F, POLR2G, POLR2H, POLR2K, POLR2L, RTF1, SSRP1, SUPT16H, SUPT5H]
R-HSA:674695	RNA Polymerase II Pre-transcription Events	REACTOME_Pathways_27.02.2019	5.95688e-21	4.2522e-20	5.14255e-19	1.67692e-18	[-1]	Group62	50	42	[CCNH, CCNK, CDC73, CDK9, CTDP1, CTR9, ELL, ELOB, ERCC2, ERCC3, GTF2A1, GTF2A2, GTF2B, GTF2E1, GTF2E2, GTF2F2, GTF2H1, GTF2H3, GTF2H4, MNAT1, NCBP1, NCBP2, NELFA, NELFB, NELFE, POLR2A, POLR2C, POLR2E, POLR2F, POLR2G, POLR2H, POLR2K, POLR2L, RTF1, SSRP1, SUPT16H, SUPT5H, TAF10, TAF5, TAF6, TAF7, TBP]
R-HSA:6796648	TP53 Regulates Transcription of DNA Repair Genes	REACTOME_Pathways_27.02.2019	3.8089e-14	1.56796e-13	5.14255e-19	1.67692e-18	[-1]	Group62	46.1538	30	[BRCA1, CCNH, CCNK, CDK9, CHEK1, CTDP1, ELL, ELOB, ERCC2, ERCC3, GTF2F2, GTF2H1, GTF2H3, GTF2H4, MNAT1, NELFA, NELFB, NELFE, POLR2A, POLR2C, POLR2E, POLR2F, POLR2G, POLR2H, POLR2K, POLR2L, RAD51D, SSRP1, SUPT16H, SUPT5H]
R-HSA:6804756	Regulation of TP53 Activity through Phosphorylation	REACTOME_Pathways_27.02.2019	6.24937e-09	1.7619e-08	5.14255e-19	1.67692e-18	[-1]	Group62	31.5217	29	[AURKB, BARD1, BRCA1, CCNA2, CHEK1, CSNK2B, HUS1, NOC2L, RAD17, RAD9A, RBBP8, RFC2, RFC3, RFC5, RMI1, RPA2, RPA3, SSRP1, SUPT16H, TAF10, TAF5, TAF6, TAF7, TBP, TOP3A, TOPBP1, TP53RK, TPX2, UBC]
R-HSA:5633007	Regulation of TP53 Activity	REACTOME_Pathways_27.02.2019	5.50657e-08	1.42112e-07	5.14255e-19	1.67692e-18	[-1]	Group62	24.375	39	[AURKB, BANP, BARD1, BRCA1, CCNA2, CHD4, CHEK1, CSNK2B, HUS1, MLST8, MTOR, NOC2L, PDPK1, PPP2CA, PPP2R1A, PRMT5, RAD17, RAD9A, RBBP4, RBBP8, RFC2, RFC3, RFC5, RMI1, RPA2, RPA3, SSRP1, SUPT16H, TAF10, TAF5, TAF6, TAF7, TBP, TOP3A, TOPBP1, TP53RK, TPX2, UBC, USP7]
R-HSA:3700989	Transcriptional Regulation by TP53	REACTOME_Pathways_27.02.2019	1.52356e-14	6.34974e-14	5.14255e-19	1.67692e-18	[-1]	Group62	23.224	85	[ARID3A, AURKB, BANP, BARD1, BIRC5, BRCA1, CCNA2, CCNH, CCNK, CDK9, CHD4, CHEK1, CNOT3, COX18, COX5A, COX5B, COX6C, COX7C, CSNK2B, CTDP1, CYCS, ELL, ELOB, ERCC2, ERCC3, GTF2F2, GTF2H1, GTF2H3, GTF2H4, HUS1, LAMTOR2, LAMTOR3, LAMTOR4, LRPPRC, MLST8, MNAT1, MTOR, NELFA, NELFB, NELFE, NOC2L, NPM1, PCNA, PDPK1, POLR2A, POLR2C, POLR2E, POLR2F, POLR2G, POLR2H, POLR2K, POLR2L, PPP2CA, PPP2R1A, PRMT1, PR…
R-HSA:73857	RNA Polymerase II Transcription	REACTOME_Pathways_27.02.2019	4.8983e-19	3.01538e-18	5.14255e-19	1.67692e-18	[-1]	Group62	17.1664	229	[ACTL6A, ARID3A, AURKB, BANP, BARD1, BIRC5, BRCA1, CCNA2, CCND1, CCNH, CCNK, CDC7, CDC73, CDK9, CHD4, CHEK1, CLP1, CNOT3, COX18, COX5A, COX5B, COX6C, COX7C, CPSF1, CPSF2, CPSF3, CPSF4, CSNK2B, CSTF1, CSTF3, CTDP1, CTR9, CUL1, CYCS, EIF4A3, ELL, ELOB, ERCC2, ERCC3, FIP1L1, GTF2A1, GTF2A2, GTF2B, GTF2E1, GTF2E2, GTF2F2, GTF2H1, GTF2H3, GTF2H4, H2AFX, H2AFZ, H3F3A, HDAC3, HIST1H2BC, HIST1H2BJ, HIST1…
R-HSA:212436	Generic Transcription Pathway	REACTOME_Pathways_27.02.2019	4.0254e-06	8.94386e-06	5.14255e-19	1.67692e-18	[-1]	Group62	13.7077	166	[ACTL6A, ARID3A, AURKB, BANP, BARD1, BIRC5, BRCA1, CCNA2, CCND1, CCNH, CCNK, CDC7, CDK9, CHD4, CHEK1, CNOT3, COX18, COX5A, COX5B, COX6C, COX7C, CSNK2B, CTDP1, CUL1, CYCS, ELL, ELOB, ERCC2, ERCC3, GTF2F2, GTF2H1, GTF2H3, GTF2H4, H2AFX, H2AFZ, H3F3A, HDAC3, HIST1H2BC, HIST1H2BJ, HIST1H2BL, HIST2H2AC, HIST2H2BE, HIST2H3D, HSPD1, HUS1, LAMTOR2, LAMTOR3, LAMTOR4, LRPPRC, MED10, MED17, MED20, MED26, ME…
R-HSA:196025	Formation of annular gap junctions	REACTOME_Pathways_27.02.2019	0.0172002	0.027414	1.82107e-16	5.46322e-16	[-1]	Group53	36.3636	4	[ACTB, ACTG1, CLTC, DNM2]
R-HSA:190873	Gap junction degradation	REACTOME_Pathways_27.02.2019	0.023837	0.0367692	1.82107e-16	5.46322e-16	[-1]	Group53	33.3333	4	[ACTB, ACTG1, CLTC, DNM2]
KEGG:04510	Focal adhesion	KEGG_27.02.2019	0.0214707	0.0334266	1.82107e-16	5.46322e-16	[-1]	Group53	5.02513	10	[ACTB, ACTG1, CCND1, GRB2, PDPK1, PPP1CA, PPP1R12A, PTK2, RAC3, TLN1]
KEGG:04921	Oxytocin signaling pathway	KEGG_27.02.2019	0.0274591	0.0417802	1.82107e-16	5.46322e-16	[-1]	Group53	4.57516	7	[ACTB, ACTG1, CACNB3, CCND1, EEF2, PPP1CA, PPP1R12A]
KEGG:05418	Fluid shear stress and atherosclerosis	KEGG_27.02.2019	0.029777	0.0448996	1.82107e-16	5.46322e-16	[-1]	Group53	4.31655	6	[ACTB, ACTG1, HSP90B1, PTK2, RAC3, SUMO2]
KEGG:04810	Regulation of actin cytoskeleton	KEGG_27.02.2019	0.00346907	0.00599934	1.82107e-16	5.46322e-16	[-1]	Group53	4.20561	9	[ACTB, ACTG1, ARPC3, NCKAP1, PFN1, PPP1CA, PPP1R12A, PTK2, RAC3]
KEGG:04611	Platelet activation	KEGG_27.02.2019	0.0316567	0.0474145	1.82107e-16	5.46322e-16	[-1]	Group53	4.03226	5	[ACTB, ACTG1, PPP1CA, PPP1R12A, TLN1]
KEGG:04670	Leukocyte transendothelial migration	KEGG_27.02.2019	0.0238696	0.036735	1.82107e-16	5.46322e-16	[-1]	Group53	3.57143	4	[ACTB, ACTG1, PTK2, PTPN11]
KEGG:05163	Human cytomegalovirus infection	KEGG_27.02.2019	0.000601041	0.00111408	1.82107e-16	5.46322e-16	[-1]	Group53	3.55556	8	[ATF4, CCND1, CYCS, GRB2, MTOR, MYC, PTK2, RAC3]
KEGG:04015	Rap1 signaling pathway	KEGG_27.02.2019	7.13177e-05	0.000142848	1.82107e-16	5.46322e-16	[-1]	Group53	2.42718	5	[ACTB, ACTG1, PFN1, RAC3, TLN1]
KEGG:04024	cAMP signaling pathway	KEGG_27.02.2019	3.41627e-05	7.07505e-05	1.82107e-16	5.46322e-16	[-1]	Group53	2.35849	5	[ATP1A1, ATP2A2, PPP1CA, PPP1R12A, RAC3]
R-HSA:379726	Mitochondrial tRNA aminoacylation	REACTOME_Pathways_27.02.2019	2.56712e-14	1.06329e-13	1.80874e-16	5.65231e-16	[-1]	Group38	80.9524	17	[AARS2, EARS2, FARS2, GARS, HARS2, IARS2, KARS, LARS2, MARS2, PARS2, PPA2, QARS, RARS2, SARS2, TARS2, VARS2, YARS2]
R-HSA:379724	tRNA Aminoacylation	REACTOME_Pathways_27.02.2019	1.92407e-24	1.87109e-23	1.80874e-16	5.65231e-16	[-1]	Group38	76.1905	32	[AARS, AARS2, CARS, DARS, EARS2, FARS2, FARSA, FARSB, GARS, HARS, HARS2, IARS, IARS2, KARS, LARS, LARS2, MARS, MARS2, NARS, PARS2, PPA1, PPA2, QARS, RARS2, SARS, SARS2, TARS, TARS2, VARS, VARS2, YARS, YARS2]
R-HSA:379716	Cytosolic tRNA aminoacylation	REACTOME_Pathways_27.02.2019	4.60089e-14	1.85976e-13	1.80874e-16	5.65231e-16	[-1]	Group38	75	18	[AARS, CARS, DARS, FARSA, FARSB, GARS, HARS, IARS, KARS, LARS, MARS, NARS, PPA1, QARS, SARS, TARS, VARS, YARS]
R-HSA:2408517	SeMet incorporation into proteins	REACTOME_Pathways_27.02.2019	0.000260668	0.000498315	1.80874e-16	5.65231e-16	[-1]	Group38	54.5455	6	[DARS, IARS, KARS, LARS, MARS, QARS]
KEGG:00970	Aminoacyl-tRNA biosynthesis	KEGG_27.02.2019	8.90943e-16	4.09468e-15	1.80874e-16	5.65231e-16	[-1]	Group38	48.4848	32	[AARS, AARS2, CARS, DARS, EARS2, FARS2, FARSA, FARSB, GARS, HARS, HARS2, IARS, IARS2, KARS, LARS, LARS2, MARS, MARS2, NARS, PARS2, PSTK, QARS, QRSL1, RARS2, SARS, SARS2, TARS, TARS2, VARS, VARS2, YARS, YARS2]
R-HSA:6804757	Regulation of TP53 Degradation	REACTOME_Pathways_27.02.2019	0.020803	0.0326141	4.55332e-15	1.31346e-14	[-1]	Group45	22.2222	8	[CCNA2, MLST8, MTOR, PDPK1, PPP2CA, PPP2R1A, UBC, USP7]
R-HSA:6806003	Regulation of TP53 Expression and Degradation	REACTOME_Pathways_27.02.2019	0.0243353	0.0372808	4.55332e-15	1.31346e-14	[-1]	Group45	21.6216	8	[CCNA2, MLST8, MTOR, PDPK1, PPP2CA, PPP2R1A, UBC, USP7]
KEGG:04151	PI3K-Akt signaling pathway	KEGG_27.02.2019	5.45186e-05	0.000110187	4.55332e-15	1.31346e-14	[-1]	Group45	3.9548	14	[ATF4, BRCA1, CCND1, GRB2, HSP90B1, MLST8, MTOR, MYC, PDPK1, PPP2CA, PPP2R1A, PTK2, RPS6, RPTOR]
KEGG:05163	Human cytomegalovirus infection	KEGG_27.02.2019	0.000601041	0.00111408	4.55332e-15	1.31346e-14	[-1]	Group45	3.55556	8	[ATF4, CCND1, CYCS, GRB2, MTOR, MYC, PTK2, RAC3]
KEGG:05226	Gastric cancer	KEGG_27.02.2019	0.00502728	0.00854002	4.55332e-15	1.31346e-14	[-1]	Group45	3.3557	5	[CCND1, CSNK1A1, GRB2, MTOR, MYC]
KEGG:05206	MicroRNAs in cancer	KEGG_27.02.2019	7.46067e-06	1.63065e-05	4.55332e-15	1.31346e-14	[-1]	Group45	3.01003	9	[BRCA1, CCND1, DICER1, GRB2, HNRNPK, MTOR, MYC, RPTOR, UBE2I]
R-HSA:1295596	Spry regulation of FGF signaling	REACTOME_Pathways_27.02.2019	0.01555	0.0250217	1.50899e-13	4.19164e-13	[-1]	Group43	31.25	5	[GRB2, PPP2CA, PPP2R1A, PTPN11, UBC]
KEGG:04630	JAK-STAT signaling pathway	KEGG_27.02.2019	0.0050114	0.00853465	1.50899e-13	4.19164e-13	[-1]	Group43	3.7037	6	[CCND1, GRB2, MTOR, MYC, PTPN11, STAT5A]
R-HSA:199418	Negative regulation of the PI3K/AKT network	REACTOME_Pathways_27.02.2019	0.0331393	0.0491957	1.50899e-13	4.19164e-13	[-1]	Group43	3.66972	4	[GRB2, PPP2CA, PPP2R1A, PTPN11]
KEGG:05226	Gastric cancer	KEGG_27.02.2019	0.00502728	0.00854002	1.50899e-13	4.19164e-13	[-1]	Group43	3.3557	5	[CCND1, CSNK1A1, GRB2, MTOR, MYC]
R-HSA:202733	Cell surface interactions at the vascular wall	REACTOME_Pathways_27.02.2019	0.00349668	0.00603156	1.50899e-13	4.19164e-13	[-1]	Group43	2.89855	4	[GRB2, PPIA, PTPN11, SLC7A5]
KEGG:04072	Phospholipase D signaling pathway	KEGG_27.02.2019	0.00185936	0.00328323	1.50899e-13	4.19164e-13	[-1]	Group43	2.7027	4	[DNM2, GRB2, MTOR, PTPN11]
R-HSA:73886	Chromosome Maintenance	REACTOME_Pathways_27.02.2019	1.27394e-10	4.12952e-10	4.87411e-13	1.30557e-12	[-1]	Group33	31.8182	35	[ACD, CENPA, CENPK, CENPW, FEN1, H2AFX, H2AFZ, HIST1H2BC, HIST1H2BJ, HIST1H2BL, HIST2H2AC, HIST2H2BE, HJURP, KNL1, MIS18A, MIS18BP1, NHP2, NPM1, OIP5, PCNA, POLA2, POLD1, POLD2, POLD3, POLE2, PRIM1, RBBP4, RFC2, RFC3, RFC5, RPA2, RPA3, RUVBL1, RUVBL2, TINF2]
R-HSA:606279	Deposition of new CENPA-containing nucleosomes at the centromere	REACTOME_Pathways_27.02.2019	0.00021349	0.000411644	4.87411e-13	1.30557e-12	[-1]	Group33	24.3243	18	[CENPA, CENPK, CENPW, H2AFX, H2AFZ, HIST1H2BC, HIST1H2BJ, HIST1H2BL, HIST2H2AC, HIST2H2BE, HJURP, KNL1, MIS18A, MIS18BP1, NPM1, OIP5, RBBP4, RUVBL1]
R-HSA:774815	Nucleosome assembly	REACTOME_Pathways_27.02.2019	0.00021349	0.000411644	4.87411e-13	1.30557e-12	[-1]	Group33	24.3243	18	[CENPA, CENPK, CENPW, H2AFX, H2AFZ, HIST1H2BC, HIST1H2BJ, HIST1H2BL, HIST2H2AC, HIST2H2BE, HJURP, KNL1, MIS18A, MIS18BP1, NPM1, OIP5, RBBP4, RUVBL1]
R-HSA:2299718	Condensation of Prophase Chromosomes	REACTOME_Pathways_27.02.2019	0.00230544	0.00403904	4.87411e-13	1.30557e-12	[-1]	Group33	21.6216	16	[H2AFX, H2AFZ, H3F3A, HIST1H2BC, HIST1H2BJ, HIST1H2BL, HIST2H2AC, HIST2H2BE, HIST2H3D, NCAPD3, NCAPG2, NCAPH2, PLK1, SET, SMC2, SMC4]
R-HSA:68616	Assembly of the ORC complex at the origin of replication	REACTOME_Pathways_27.02.2019	0.00116693	0.00209361	3.41305e-10	8.82686e-10	[-1]	Group42	66.6667	4	[ORC1, ORC3, ORC4, ORC5]
R-HSA:68962	Activation of the pre-replicative complex	REACTOME_Pathways_27.02.2019	1.25268e-11	4.35516e-11	3.41305e-10	8.82686e-10	[-1]	Group42	57.5758	19	[CDC45, CDC6, CDC7, CDT1, MCM2, MCM3, MCM4, MCM5, MCM6, MCM7, ORC1, ORC3, ORC4, ORC5, POLA2, POLE2, PRIM1, RPA2, RPA3]
R-HSA:68689	CDC6 association with the ORC:origin complex	REACTOME_Pathways_27.02.2019	0.00248972	0.00435053	3.41305e-10	8.82686e-10	[-1]	Group42	45.4545	5	[CDC6, ORC1, ORC3, ORC4, ORC5]
R-HSA:113507	E2F-enabled inhibition of pre-replication complex formation	REACTOME_Pathways_27.02.2019	0.00770115	0.0126965	3.41305e-10	8.82686e-10	[-1]	Group42	44.4444	4	[ORC1, ORC3, ORC4, ORC5]
R-HSA:113510	E2F mediated regulation of DNA replication	REACTOME_Pathways_27.02.2019	0.000752793	0.00138012	3.41305e-10	8.82686e-10	[-1]	Group42	36.3636	8	[ORC1, ORC3, ORC4, ORC5, POLA2, PPP2CA, PPP2R1A, PRIM1]
R-HSA:113501	Inhibition of replication initiation of damaged DNA by RB1/E2F1	REACTOME_Pathways_27.02.2019	0.0318217	0.0475553	3.41305e-10	8.82686e-10	[-1]	Group42	30.7692	4	[POLA2, PPP2CA, PPP2R1A, PRIM1]
KEGG:03060	Protein export	KEGG_27.02.2019	2.42024e-09	7.0608e-09	7.32076e-10	1.83019e-09	[-1]	Group36	60.8696	14	[SEC61A1, SEC61B, SEC61G, SEC62, SEC63, SPCS2, SPCS3, SRP14, SRP19, SRP54, SRP72, SRP9, SRPRA, SRPRB]
R-HSA:381119	Unfolded Protein Response (UPR)	REACTOME_Pathways_27.02.2019	3.63757e-07	8.71718e-07	7.32076e-10	1.83019e-09	[-1]	Group36	27.8351	27	[ASNA1, ATF4, CXXC1, DIS3, EIF2S1, EXOSC1, EXOSC2, EXOSC3, EXOSC4, EXOSC5, EXOSC6, EXOSC7, EXOSC8, GOSR2, HSP90B1, HYOU1, NFYB, PREB, SEC61A1, SEC61B, SEC61G, SEC62, SEC63, SRPRA, SRPRB, TLN1, ZBTB17]
R-HSA:381038	XBP1(S) activates chaperone genes	REACTOME_Pathways_27.02.2019	0.000944999	0.00170915	7.32076e-10	1.83019e-09	[-1]	Group36	24.5614	14	[ASNA1, CXXC1, GOSR2, HYOU1, PREB, SEC61A1, SEC61B, SEC61G, SEC62, SEC63, SRPRA, SRPRB, TLN1, ZBTB17]
R-HSA:381070	IRE1alpha activates chaperones	REACTOME_Pathways_27.02.2019	0.00135709	0.0024154	7.32076e-10	1.83019e-09	[-1]	Group36	23.7288	14	[ASNA1, CXXC1, GOSR2, HYOU1, PREB, SEC61A1, SEC61B, SEC61G, SEC62, SEC63, SRPRA, SRPRB, TLN1, ZBTB17]
R-HSA:429958	mRNA decay by 3' to 5' exoribonuclease	REACTOME_Pathways_27.02.2019	4.85791e-06	1.0758e-05	2.16216e-09	5.23104e-09	[-1]	Group56	56.25	9	[DIS3, EXOSC1, EXOSC2, EXOSC3, EXOSC4, EXOSC5, EXOSC6, EXOSC7, EXOSC8]
R-HSA:450385	Butyrate Response Factor 1 (BRF1) binds and destabilizes mRNA	REACTOME_Pathways_27.02.2019	9.42562e-06	2.02711e-05	2.16216e-09	5.23104e-09	[-1]	Group56	52.9412	9	[DIS3, EXOSC1, EXOSC2, EXOSC3, EXOSC4, EXOSC5, EXOSC6, EXOSC7, EXOSC8]
R-HSA:450513	Tristetraprolin (TTP, ZFP36) binds and destabilizes mRNA	REACTOME_Pathways_27.02.2019	9.42562e-06	2.02711e-05	2.16216e-09	5.23104e-09	[-1]	Group56	52.9412	9	[DIS3, EXOSC1, EXOSC2, EXOSC3, EXOSC4, EXOSC5, EXOSC6, EXOSC7, EXOSC8]
R-HSA:450604	KSRP (KHSRP) binds and destabilizes mRNA	REACTOME_Pathways_27.02.2019	9.42562e-06	2.02711e-05	2.16216e-09	5.23104e-09	[-1]	Group56	52.9412	9	[DIS3, EXOSC1, EXOSC2, EXOSC3, EXOSC4, EXOSC5, EXOSC6, EXOSC7, EXOSC8]
R-HSA:380994	ATF4 activates genes	REACTOME_Pathways_27.02.2019	9.24261e-06	1.99414e-05	2.16216e-09	5.23104e-09	[-1]	Group56	44	11	[ATF4, DIS3, EXOSC1, EXOSC2, EXOSC3, EXOSC4, EXOSC5, EXOSC6, EXOSC7, EXOSC8, NFYB]
R-HSA:381042	PERK regulates gene expression	REACTOME_Pathways_27.02.2019	5.03691e-06	1.11177e-05	2.16216e-09	5.23104e-09	[-1]	Group56	42.8571	12	[ATF4, DIS3, EIF2S1, EXOSC1, EXOSC2, EXOSC3, EXOSC4, EXOSC5, EXOSC6, EXOSC7, EXOSC8, NFYB]
R-HSA:430039	mRNA decay by 5' to 3' exoribonuclease	REACTOME_Pathways_27.02.2019	0.00200116	0.00352435	2.16216e-09	5.23104e-09	[-1]	Group56	40	6	[DDX6, EDC4, LSM2, LSM5, LSM6, LSM7]
R-HSA:429914	Deadenylation-dependent mRNA decay	REACTOME_Pathways_27.02.2019	1.40369e-07	3.52763e-07	2.16216e-09	5.23104e-09	[-1]	Group56	35.7143	20	[CNOT3, DDX6, DIS3, EDC4, EIF4A1, EIF4A3, EIF4G1, EXOSC1, EXOSC2, EXOSC3, EXOSC4, EXOSC5, EXOSC6, EXOSC7, EXOSC8, LSM2, LSM5, LSM6, LSM7, PABPC1]
KEGG:03018	RNA degradation	KEGG_27.02.2019	6.32989e-08	1.62734e-07	2.16216e-09	5.23104e-09	[-1]	Group56	31.6456	25	[C1D, CNOT3, DDX6, DHX36, DIS3, EDC4, EXOSC1, EXOSC10, EXOSC2, EXOSC3, EXOSC4, EXOSC5, EXOSC6, EXOSC7, EXOSC8, HSPA9, HSPD1, LSM2, LSM5, LSM6, LSM7, MTREX, PABPC1, PNPT1, XRN2]
R-HSA:381119	Unfolded Protein Response (UPR)	REACTOME_Pathways_27.02.2019	3.63757e-07	8.71718e-07	2.16216e-09	5.23104e-09	[-1]	Group56	27.8351	27	[ASNA1, ATF4, CXXC1, DIS3, EIF2S1, EXOSC1, EXOSC2, EXOSC3, EXOSC4, EXOSC5, EXOSC6, EXOSC7, EXOSC8, GOSR2, HSP90B1, HYOU1, NFYB, PREB, SEC61A1, SEC61B, SEC61G, SEC62, SEC63, SRPRA, SRPRB, TLN1, ZBTB17]
R-HSA:381038	XBP1(S) activates chaperone genes	REACTOME_Pathways_27.02.2019	0.000944999	0.00170915	2.16216e-09	5.23104e-09	[-1]	Group56	24.5614	14	[ASNA1, CXXC1, GOSR2, HYOU1, PREB, SEC61A1, SEC61B, SEC61G, SEC62, SEC63, SRPRA, SRPRB, TLN1, ZBTB17]
R-HSA:381070	IRE1alpha activates chaperones	REACTOME_Pathways_27.02.2019	0.00135709	0.0024154	2.16216e-09	5.23104e-09	[-1]	Group56	23.7288	14	[ASNA1, CXXC1, GOSR2, HYOU1, PREB, SEC61A1, SEC61B, SEC61G, SEC62, SEC63, SRPRA, SRPRB, TLN1, ZBTB17]
KEGG:04022	cGMP-PKG signaling pathway	KEGG_27.02.2019	0.0118503	0.0192532	5.98279e-09	1.40222e-08	[-1]	Group28	4.21687	7	[ATF4, ATP1A1, ATP2A2, PPP1CA, PPP1R12A, SRF, VDAC1]
KEGG:04810	Regulation of actin cytoskeleton	KEGG_27.02.2019	0.00346907	0.00599934	5.98279e-09	1.40222e-08	[-1]	Group28	4.20561	9	[ACTB, ACTG1, ARPC3, NCKAP1, PFN1, PPP1CA, PPP1R12A, PTK2, RAC3]
KEGG:04024	cAMP signaling pathway	KEGG_27.02.2019	3.41627e-05	7.07505e-05	5.98279e-09	1.40222e-08	[-1]	Group28	2.35849	5	[ATP1A1, ATP2A2, PPP1CA, PPP1R12A, RAC3]
R-HSA:2564830	Cytosolic iron-sulfur cluster assembly	REACTOME_Pathways_27.02.2019	1.69597e-08	4.60726e-08	1.69597e-08	3.85447e-08	[-1]	Group12	76.9231	10	[CIAO1, CIAO2B, CIAO3, CIAPIN1, ERCC2, MMS19, NDOR1, NUBP1, NUBP2, POLD1]
R-HSA:141405	Inhibition of the proteolytic activity of APC/C required for the onset of anaphase by mitotic spindle checkpoint components	REACTOME_Pathways_27.02.2019	2.8702e-09	8.30132e-09	9.21833e-08	2.03345e-07	[-1]	Group50	65	13	[ANAPC1, ANAPC10, ANAPC11, ANAPC15, ANAPC4, ANAPC5, BUB1B, BUB3, CDC16, CDC20, CDC23, CDC26, MAD2L1]
R-HSA:141430	Inactivation of APC/C via direct inhibition of the APC/C complex	REACTOME_Pathways_27.02.2019	2.8702e-09	8.30132e-09	9.21833e-08	2.03345e-07	[-1]	Group50	65	13	[ANAPC1, ANAPC10, ANAPC11, ANAPC15, ANAPC4, ANAPC5, BUB1B, BUB3, CDC16, CDC20, CDC23, CDC26, MAD2L1]
R-HSA:179409	APC-Cdc20 mediated degradation of Nek2A	REACTOME_Pathways_27.02.2019	1.09305e-08	3.0059e-08	9.21833e-08	2.03345e-07	[-1]	Group50	56	14	[ANAPC1, ANAPC10, ANAPC11, ANAPC15, ANAPC4, ANAPC5, BUB1B, BUB3, CDC16, CDC20, CDC23, CDC26, MAD2L1, UBC]
R-HSA:176407	Conversion from APC/C:Cdc20 to APC/C:Cdh1 in late anaphase	REACTOME_Pathways_27.02.2019	3.15294e-06	7.05209e-06	9.21833e-08	2.03345e-07	[-1]	Group50	52.6316	10	[ANAPC1, ANAPC10, ANAPC11, ANAPC15, ANAPC4, ANAPC5, CDC16, CDC20, CDC23, CDC26]
R-HSA:176412	Phosphorylation of the APC/C	REACTOME_Pathways_27.02.2019	3.15294e-06	7.05209e-06	9.21833e-08	2.03345e-07	[-1]	Group50	52.6316	10	[ANAPC1, ANAPC10, ANAPC11, ANAPC15, ANAPC4, ANAPC5, CDC16, CDC23, CDC26, PLK1]
R-HSA:174048	APC/C:Cdc20 mediated degradation of Cyclin B	REACTOME_Pathways_27.02.2019	3.37263e-06	7.51839e-06	9.21833e-08	2.03345e-07	[-1]	Group50	47.8261	11	[ANAPC1, ANAPC10, ANAPC11, ANAPC15, ANAPC4, ANAPC5, CDC16, CDC20, CDC23, CDC26, UBC]
R-HSA:983168	Antigen processing: Ubiquitination & Proteasome degradation	REACTOME_Pathways_27.02.2019	3.10242e-08	8.2608e-08	9.21833e-08	2.03345e-07	[-1]	Group50	20.0647	62	[ANAPC1, ANAPC10, ANAPC11, ANAPC4, ANAPC5, CDC16, CDC20, CDC23, CDC26, CUL1, CUL3, ELOB, HECTD1, LRR1, MKRN1, NPEPPS, PSMA1, PSMA2, PSMA3, PSMA4, PSMA5, PSMA6, PSMA7, PSMB1, PSMB2, PSMB3, PSMB4, PSMB5, PSMB6, PSMB7, PSMC1, PSMC2, PSMC3, PSMC4, PSMC5, PSMC6, PSMD11, PSMD12, PSMD13, PSMD14, PSMD2, PSMD3, PSMD4, PSMD6, PSMD7, PSMD8, PSME1, RBBP6, RBX1, RNF14, RNF4, SEM1, SKP1, UBA3, UBA5, UBC, UBE2D…
KEGG:04120	Ubiquitin mediated proteolysis	KEGG_27.02.2019	0.00118211	0.00211519	9.21833e-08	2.03345e-07	[-1]	Group50	18.9781	26	[ANAPC1, ANAPC10, ANAPC11, ANAPC4, ANAPC5, BRCA1, CDC16, CDC20, CDC23, CDC26, CUL1, CUL3, DDB1, ELOB, PRPF19, RBX1, SAE1, SKP1, UBA2, UBA3, UBE2D3, UBE2I, UBE2M, UBE2N, UBR5, VHL]
KEGG:04114	Oocyte meiosis	KEGG_27.02.2019	0.00593946	0.00991387	9.21833e-08	2.03345e-07	[-1]	Group50	17.6	22	[ANAPC1, ANAPC10, ANAPC11, ANAPC4, ANAPC5, CDC16, CDC20, CDC23, CDC26, CUL1, ESPL1, MAD2L1, MAD2L2, PKMYT1, PLK1, PPP1CA, PPP2CA, PPP2R1A, RBX1, SGO1, SKP1, SMC3]
R-HSA:72731	Recycling of eIF2:GDP	REACTOME_Pathways_27.02.2019	6.21421e-07	1.47863e-06	6.21421e-07	1.33162e-06	[-1]	Group02	87.5	7	[EIF2B1, EIF2B2, EIF2B3, EIF2B4, EIF2B5, EIF2S1, EIF2S2]
R-HSA:163210	Formation of ATP by chemiosmotic coupling	REACTOME_Pathways_27.02.2019	0.00102221	0.00184383	6.16689e-06	1.28477e-05	[-1]	Group39	38.8889	7	[ATP5F1B, ATP5F1D, ATP5F1E, ATP5MC1, ATP5ME, ATP5PB, ATP5PO]
R-HSA:8949613	Cristae formation	REACTOME_Pathways_27.02.2019	0.00010103	0.00020176	6.16689e-06	1.28477e-05	[-1]	Group39	35.4839	11	[ATP5F1B, ATP5F1D, ATP5F1E, ATP5MC1, ATP5ME, ATP5PB, ATP5PO, DNAJC11, HSPA9, MICOS10, SAMM50]
R-HSA:1592230	Mitochondrial biogenesis	REACTOME_Pathways_27.02.2019	0.000332436	0.000626587	6.16689e-06	1.28477e-05	[-1]	Group39	22.1053	21	[ATP5F1B, ATP5F1D, ATP5F1E, ATP5MC1, ATP5ME, ATP5PB, ATP5PO, CYCS, DNAJC11, GABPA, HDAC3, HSPA9, MICOS10, POLG2, POLRMT, PPARGC1B, PPRC1, SAMM50, SOD2, TFB2M, TWNK]
R-HSA:2151201	Transcriptional activation of mitochondrial biogenesis	REACTOME_Pathways_27.02.2019	0.0214417	0.0334591	6.16689e-06	1.28477e-05	[-1]	Group39	19.6429	11	[ATP5F1B, CYCS, GABPA, HDAC3, POLG2, POLRMT, PPARGC1B, PPRC1, SOD2, TFB2M, TWNK]
R-HSA:1852241	Organelle biogenesis and maintenance	REACTOME_Pathways_27.02.2019	6.16689e-06	1.35672e-05	6.16689e-06	1.28477e-05	[-1]	Group39	18.2432	54	[ACTR1A, ARF4, ATP5F1B, ATP5F1D, ATP5F1E, ATP5MC1, ATP5ME, ATP5PB, ATP5PO, CCP110, CCT2, CCT3, CCT4, CCT8, CEP192, CEP97, CKAP5, CYCS, DCTN2, DCTN3, DNAJC11, DYNC1H1, DYNC1I2, DYNLRB1, EXOC1, EXOC5, EXOC8, FGFR1OP, GABPA, HAUS1, HAUS3, HAUS4, HAUS5, HAUS8, HDAC3, HSPA9, MICOS10, NEDD1, PAFAH1B1, PLK1, PLK4, POLG2, POLRMT, PPARGC1B, PPP2R1A, PPRC1, SAMM50, SOD2, TFB2M, TUBA1C, TUBB, TUBB8, TUBG1, …
R-HSA:381340	Transcriptional regulation of white adipocyte differentiation	REACTOME_Pathways_27.02.2019	0.0242902	0.0372968	6.96021e-06	1.41085e-05	[-1]	Group31	17.8571	15	[HDAC3, MED10, MED11, MED17, MED18, MED20, MED21, MED26, MED28, MED29, MED30, MED6, MED7, MED8, MED9]
R-HSA:400206	Regulation of lipid metabolism by Peroxisome proliferator-activated receptor alpha (PPARalpha)	REACTOME_Pathways_27.02.2019	0.0292335	0.0443794	6.96021e-06	1.41085e-05	[-1]	Group31	15.9664	19	[HDAC3, HMGCS1, MED10, MED11, MED17, MED18, MED20, MED21, MED26, MED28, MED29, MED30, MED6, MED7, MED8, MED9, NFYB, PPARGC1B, SIN3A]
R-HSA:556833	Metabolism of lipids	REACTOME_Pathways_27.02.2019	2.90048e-05	6.06299e-05	6.96021e-06	1.41085e-05	[-1]	Group31	5.56309	41	[CDIPT, CSNK2B, FDPS, FDXR, GGPS1, HDAC3, HMGCS1, HSD17B12, MED10, MED11, MED17, MED18, MED20, MED21, MED26, MED28, MED29, MED30, MED6, MED7, MED8, MED9, MVD, NDUFAB1, NFYB, PCYT1A, PGS1, PI4KA, PIK3C3, PIK3R4, PPARGC1B, PPP1CA, PTPMT1, SACM1L, SCAP, SGPP1, SIN3A, SPTLC1, SRD5A3, SUMO2, UBE2I]
R-HSA:109582	Hemostasis	REACTOME_Pathways_27.02.2019	2.13532e-05	4.51987e-05	2.13532e-05	4.21444e-05	[-1]	Group17	5.13644	32	[ACTB, ALDOA, ATP2A2, C1QBP, CAP1, CAPZB, CENPE, GRB2, H3F3A, HIST2H3D, KIF11, KIF18A, MANF, NHLRC2, PDPK1, PFN1, PPIA, PPP2CA, PPP2R1A, PTK2, PTPN11, RACGAP1, RAD51C, RCOR1, SIN3A, SLC7A5, SOD1, TLN1, TUBA1C, TUBB8, WDR1, WEE1]
R-HSA:76002	Platelet activation, signaling and aggregation	REACTOME_Pathways_27.02.2019	0.00597445	0.00994753	2.13532e-05	4.21444e-05	[-1]	Group17	4.96183	13	[ALDOA, CAP1, GRB2, MANF, NHLRC2, PDPK1, PFN1, PPIA, PTK2, PTPN11, SOD1, TLN1, WDR1]
R-HSA:112314	Neurotransmitter receptors and postsynaptic signal transmission	REACTOME_Pathways_27.02.2019	2.88601e-05	6.0516e-05	2.88601e-05	5.55002e-05	[-1]	Group08	2.0202	4	[NSF, PDPK1, TUBA1C, TUBB8]
R-HSA:1268020	Mitochondrial protein import	REACTOME_Pathways_27.02.2019	6.818e-11	2.27606e-10	3.23921e-05	6.07352e-05	[-1]	Group20	40.625	26	[ATP5F1B, ATP5MC1, BCS1L, CHCHD2, CHCHD4, COX17, COX19, CS, FXN, GFER, GRPEL1, HSCB, HSPA9, HSPD1, NDUFB8, PMPCB, SAMM50, TIMM10, TIMM13, TIMM22, TIMM23, TIMM44, TOMM20, TOMM22, TOMM40, VDAC1]
R-HSA:9609507	Protein localization	REACTOME_Pathways_27.02.2019	3.23921e-05	6.75004e-05	3.23921e-05	6.07352e-05	[-1]	Group20	22.0472	28	[ATP5F1B, ATP5MC1, BCS1L, CHCHD2, CHCHD4, COX17, COX19, CS, FXN, GFER, GRPEL1, HSCB, HSPA9, HSPD1, NDUFB8, PMPCB, SAMM50, TIMM10, TIMM13, TIMM22, TIMM23, TIMM44, TOMM20, TOMM22, TOMM40, UBC, UBE2D3, VDAC1]
R-HSA:6811438	Intra-Golgi traffic	REACTOME_Pathways_27.02.2019	0.00877139	0.0143902	3.49338e-05	6.39032e-05	[-1]	Group32	22.7273	10	[COG1, COG2, COG3, COG4, COG8, GOSR2, NAPA, NSF, STX5, YKT6]
R-HSA:6811440	Retrograde transport at the Trans-Golgi-Network	REACTOME_Pathways_27.02.2019	0.00674394	0.011201	3.49338e-05	6.39032e-05	[-1]	Group32	22.449	11	[ARFRP1, COG1, COG2, COG3, COG4, COG8, NAA35, NAPA, NSF, SYS1, VPS51]
R-HSA:6811442	Intra-Golgi and retrograde Golgi-to-ER traffic	REACTOME_Pathways_27.02.2019	3.49338e-05	7.21248e-05	3.49338e-05	6.39032e-05	[-1]	Group32	19.3069	39	[ACTR10, ACTR1A, ARCN1, ARF4, ARFRP1, CAPZB, CENPE, COG1, COG2, COG3, COG4, COG8, COPB2, COPE, COPZ1, DCTN2, DCTN3, DCTN4, DCTN5, DCTN6, DYNC1H1, DYNC1I2, GOSR2, KIF11, KIF18A, NAA35, NAPA, NSF, PAFAH1B1, RAB18, RACGAP1, RINT1, STX18, STX5, SYS1, TUBA1C, TUBB8, VPS51, YKT6]
R-HSA:446199	Synthesis of Dolichyl-phosphate	REACTOME_Pathways_27.02.2019	4.92378e-05	0.000100421	6.43985e-05	0.000114997	[-1]	Group25	83.3333	5	[DHDDS, DOLK, MVD, NUS1, SRD5A3]
R-HSA:69273	Cyclin A/B1/B2 associated events during G2/M transition	REACTOME_Pathways_27.02.2019	6.43985e-05	0.000129375	6.43985e-05	0.000114997	[-1]	Group00	40	10	[CCNA2, CCNH, MNAT1, PKMYT1, PLK1, PPME1, PPP2CA, PPP2R1A, WEE1, XPO1]
KEGG:00900	Terpenoid backbone biosynthesis	KEGG_27.02.2019	0.000752793	0.00138012	6.43985e-05	0.000114997	[-1]	Group25	36.3636	8	[DHDDS, FDPS, FNTA, FNTB, GGPS1, HMGCS1, MVD, NUS1]
R-HSA:6811436	COPI-independent Golgi-to-ER retrograde traffic	REACTOME_Pathways_27.02.2019	0.000277149	0.000526819	7.24155e-05	0.000126306	[-1]	Group60	27.451	14	[ACTR10, ACTR1A, CAPZB, DCTN2, DCTN3, DCTN4, DCTN5, DCTN6, DYNC1H1, DYNC1I2, PAFAH1B1, RAB18, TUBA1C, TUBB8]
R-HSA:6807878	COPI-mediated anterograde transport	REACTOME_Pathways_27.02.2019	8.77988e-07	2.05989e-06	7.24155e-05	0.000126306	[-1]	Group60	26.7327	27	[ACTR10, ACTR1A, ARCN1, ARF4, CAPZB, COG1, COG2, COG3, COG4, COG8, COPB2, COPE, COPZ1, DCTN2, DCTN3, DCTN4, DCTN5, DCTN6, DYNC1H1, DYNC1I2, GOSR2, NAPA, NSF, STX5, TUBA1C, TUBB8, YKT6]
R-HSA:199977	ER to Golgi Anterograde Transport	REACTOME_Pathways_27.02.2019	1.66531e-06	3.78786e-06	7.24155e-05	0.000126306	[-1]	Group60	22.7273	35	[ACTR10, ACTR1A, ARCN1, ARF4, CAPZB, COG1, COG2, COG3, COG4, COG8, COPB2, COPE, COPZ1, DCTN2, DCTN3, DCTN4, DCTN5, DCTN6, DYNC1H1, DYNC1I2, GOSR2, NAPA, NSF, PPP6C, PREB, SEC13, SEC16A, STX5, TRAPPC1, TRAPPC3, TRAPPC4, TRAPPC5, TUBA1C, TUBB8, YKT6]
R-HSA:6811438	Intra-Golgi traffic	REACTOME_Pathways_27.02.2019	0.00877139	0.0143902	7.24155e-05	0.000126306	[-1]	Group60	22.7273	10	[COG1, COG2, COG3, COG4, COG8, GOSR2, NAPA, NSF, STX5, YKT6]
R-HSA:6811440	Retrograde transport at the Trans-Golgi-Network	REACTOME_Pathways_27.02.2019	0.00674394	0.011201	7.24155e-05	0.000126306	[-1]	Group60	22.449	11	[ARFRP1, COG1, COG2, COG3, COG4, COG8, NAA35, NAPA, NSF, SYS1, VPS51]
R-HSA:3371497	HSP90 chaperone cycle for steroid hormone receptors (SHR)	REACTOME_Pathways_27.02.2019	0.00946766	0.0154946	7.24155e-05	0.000126306	[-1]	Group60	21.8182	12	[ACTR10, ACTR1A, CAPZB, DCTN2, DCTN3, DCTN4, DCTN5, DCTN6, DYNC1H1, DYNC1I2, TUBA1C, TUBB8]
R-HSA:8856688	Golgi-to-ER retrograde transport	REACTOME_Pathways_27.02.2019	0.000310019	0.000585979	7.24155e-05	0.000126306	[-1]	Group60	20.3008	27	[ACTR10, ACTR1A, ARCN1, ARF4, CAPZB, CENPE, COPB2, COPE, COPZ1, DCTN2, DCTN3, DCTN4, DCTN5, DCTN6, DYNC1H1, DYNC1I2, KIF11, KIF18A, NAPA, NSF, PAFAH1B1, RAB18, RACGAP1, RINT1, STX18, TUBA1C, TUBB8]
R-HSA:948021	Transport to the Golgi and subsequent modification	REACTOME_Pathways_27.02.2019	5.11017e-05	0.000103907	7.24155e-05	0.000126306	[-1]	Group60	19.4595	36	[ACTR10, ACTR1A, ARCN1, ARF4, B4GALT3, CAPZB, COG1, COG2, COG3, COG4, COG8, COPB2, COPE, COPZ1, DCTN2, DCTN3, DCTN4, DCTN5, DCTN6, DYNC1H1, DYNC1I2, GOSR2, NAPA, NSF, PPP6C, PREB, SEC13, SEC16A, STX5, TRAPPC1, TRAPPC3, TRAPPC4, TRAPPC5, TUBA1C, TUBB8, YKT6]
R-HSA:6811442	Intra-Golgi and retrograde Golgi-to-ER traffic	REACTOME_Pathways_27.02.2019	3.49338e-05	7.21248e-05	7.24155e-05	0.000126306	[-1]	Group60	19.3069	39	[ACTR10, ACTR1A, ARCN1, ARF4, ARFRP1, CAPZB, CENPE, COG1, COG2, COG3, COG4, COG8, COPB2, COPE, COPZ1, DCTN2, DCTN3, DCTN4, DCTN5, DCTN6, DYNC1H1, DYNC1I2, GOSR2, KIF11, KIF18A, NAA35, NAPA, NSF, PAFAH1B1, RAB18, RACGAP1, RINT1, STX18, STX5, SYS1, TUBA1C, TUBB8, VPS51, YKT6]
R-HSA:204005	COPII-mediated vesicle transport	REACTOME_Pathways_27.02.2019	0.0210844	0.0329782	7.24155e-05	0.000126306	[-1]	Group60	19.1176	13	[GOSR2, NAPA, NSF, PPP6C, PREB, SEC13, SEC16A, STX5, TRAPPC1, TRAPPC3, TRAPPC4, TRAPPC5, YKT6]
R-HSA:446203	Asparagine N-linked glycosylation	REACTOME_Pathways_27.02.2019	1.21452e-06	2.7909e-06	7.24155e-05	0.000126306	[-1]	Group60	18.75	57	[ACTR10, ACTR1A, ALG1, ALG14, ALG2, ARCN1, ARF4, B4GALT3, CAPZB, COG1, COG2, COG3, COG4, COG8, COPB2, COPE, COPZ1, DAD1, DCTN2, DCTN3, DCTN4, DCTN5, DCTN6, DDOST, DHDDS, DOLK, DPAGT1, DPM2, DYNC1H1, DYNC1I2, GMPPB, GNPNAT1, GOSR2, MVD, NAPA, NSF, NUS1, PPP6C, PREB, PSMC1, RFT1, RNF103, RPN1, RPN2, SEC13, SEC16A, SRD5A3, STX5, TRAPPC1, TRAPPC3, TRAPPC4, TRAPPC5, TUBA1C, TUBB8, UBC, VCP, YKT6]
R-HSA:597592	Post-translational protein modification	REACTOME_Pathways_27.02.2019	3.45117e-07	8.30012e-07	7.24155e-05	0.000126306	[-1]	Group60	13.7159	196	[ACTB, ACTL6A, ACTR10, ACTR1A, ACTR8, ALG1, ALG14, ALG2, ARCN1, ARF4, AURKB, B4GALT3, BAP1, BARD1, BIRC5, BRCA1, CAPZB, CCNA2, CCP110, CDC20, CDC73, CDCA8, COG1, COG2, COG3, COG4, COG8, COPB2, COPE, COPS2, COPS3, COPS4, COPS5, COPS6, COPS8, COPZ1, CTR9, CUL1, CUL3, DAD1, DCTN2, DCTN3, DCTN4, DCTN5, DCTN6, DDB1, DDOST, DDX5, DHDDS, DHPS, DOHH, DOLK, DPAGT1, DPH6, DPM2, DTL, DYNC1H1, DYNC1I2, EEF2,…
R-HSA:199991	Membrane Trafficking	REACTOME_Pathways_27.02.2019	0.0161422	0.0258506	7.24155e-05	0.000126306	[-1]	Group60	12.6183	80	[ACTB, ACTG1, ACTR10, ACTR1A, ACTR2, ARCN1, ARF4, ARFRP1, ARPC3, CAPZB, CENPE, CHMP2A, CHMP5, CHMP6, CHMP7, CLTC, COG1, COG2, COG3, COG4, COG8, COPB2, COPE, COPS2, COPS3, COPS4, COPS5, COPS6, COPS8, COPZ1, DCTN2, DCTN3, DCTN4, DCTN5, DCTN6, DNM2, DYNC1H1, DYNC1I2, EXOC1, EXOC5, EXOC8, GJA3, GOSR2, GPS1, GRB2, HGS, KIF11, KIF18A, NAA35, NAPA, NEDD8, NSF, PAFAH1B1, PPP6C, PREB, RAB18, RACGAP1, RHOQ…
R-HSA:3214847	HATs acetylate histones	REACTOME_Pathways_27.02.2019	2.10662e-05	4.47324e-05	0.000129053	0.000219976	[-1]	Group30	21.831	31	[ACTB, ACTL6A, DMAP1, ELP1, ELP2, ELP3, ELP5, ELP6, EP400, HIST1H2BC, HIST1H2BJ, HIST1H2BL, HIST2H2AC, HIST2H2BE, HIST2H3D, ING3, KANSL1, KANSL3, MRGBP, RUVBL1, RUVBL2, SAP130, TADA2A, TADA3, TAF10, TAF6L, TRRAP, VPS72, WDR5, YEATS2, YEATS4]
R-HSA:3247509	Chromatin modifying enzymes	REACTOME_Pathways_27.02.2019	0.000129053	0.00025469	0.000129053	0.000219976	[-1]	Group30	17.0909	47	[ACTB, ACTL6A, CCND1, CHD4, DMAP1, ELP1, ELP2, ELP3, ELP5, ELP6, EP400, H2AFX, H2AFZ, HDAC3, HIST1H2BC, HIST1H2BJ, HIST1H2BL, HIST2H2AC, HIST2H2BE, HIST2H3D, ING3, JMJD6, KANSL1, KANSL3, KDM2A, KDM8, MRGBP, PRMT1, PRMT5, RBBP4, RCOR1, RUVBL1, RUVBL2, SAP130, SAP18, SETD1A, SMARCB1, TADA2A, TADA3, TAF10, TAF6L, TRRAP, VPS72, WDR5, WDR77, YEATS2, YEATS4]
R-HSA:4839726	Chromatin organization	REACTOME_Pathways_27.02.2019	0.000129053	0.00025469	0.000129053	0.000219976	[-1]	Group30	17.0909	47	[ACTB, ACTL6A, CCND1, CHD4, DMAP1, ELP1, ELP2, ELP3, ELP5, ELP6, EP400, H2AFX, H2AFZ, HDAC3, HIST1H2BC, HIST1H2BJ, HIST1H2BL, HIST2H2AC, HIST2H2BE, HIST2H3D, ING3, JMJD6, KANSL1, KANSL3, KDM2A, KDM8, MRGBP, PRMT1, PRMT5, RBBP4, RCOR1, RUVBL1, RUVBL2, SAP130, SAP18, SETD1A, SMARCB1, TADA2A, TADA3, TAF10, TAF6L, TRRAP, VPS72, WDR5, WDR77, YEATS2, YEATS4]
R-HSA:6785470	tRNA processing in the mitochondrion	REACTOME_Pathways_27.02.2019	0.000421802	0.000790584	0.000260668	0.000434447	[-1]	Group18	80	4	[ELAC2, KIAA0391, TRMT10C, TRNT1]
R-HSA:8868766	rRNA processing in the mitochondrion	REACTOME_Pathways_27.02.2019	0.00147652	0.00262101	0.000260668	0.000434447	[-1]	Group18	50	5	[ELAC2, KIAA0391, MRM2, NSUN4, TRMT10C]
R-HSA:1295596	Spry regulation of FGF signaling	REACTOME_Pathways_27.02.2019	0.01555	0.0250217	0.000305998	0.00049891	[-1]	Group37	31.25	5	[GRB2, PPP2CA, PPP2R1A, PTPN11, UBC]
R-HSA:6804757	Regulation of TP53 Degradation	REACTOME_Pathways_27.02.2019	0.020803	0.0326141	0.000305998	0.00049891	[-1]	Group37	22.2222	8	[CCNA2, MLST8, MTOR, PDPK1, PPP2CA, PPP2R1A, UBC, USP7]
R-HSA:6806003	Regulation of TP53 Expression and Degradation	REACTOME_Pathways_27.02.2019	0.0243353	0.0372808	0.000305998	0.00049891	[-1]	Group37	21.6216	8	[CCNA2, MLST8, MTOR, PDPK1, PPP2CA, PPP2R1A, UBC, USP7]
KEGG:04151	PI3K-Akt signaling pathway	KEGG_27.02.2019	5.45186e-05	0.000110187	0.000305998	0.00049891	[-1]	Group37	3.9548	14	[ATF4, BRCA1, CCND1, GRB2, HSP90B1, MLST8, MTOR, MYC, PDPK1, PPP2CA, PPP2R1A, PTK2, RPS6, RPTOR]
KEGG:04621	NOD-like receptor signaling pathway	KEGG_27.02.2019	0.000516376	0.000959801	0.000516376	0.000824004	[-1]	Group15	2.80899	5	[DHX33, DNM1L, SUGT1, TRPM7, VDAC1]
KEGG:04122	Sulfur relay system	KEGG_27.02.2019	0.00463524	0.0079546	0.000560466	0.000875728	[-1]	Group22	50	4	[CTU2, MOCS3, NFS1, URM1]
R-HSA:196854	Metabolism of vitamins and cofactors	REACTOME_Pathways_27.02.2019	5.77028e-05	0.000116272	0.000560466	0.000875728	[-1]	Group22	2.1164	4	[COASY, COQ5, MOCS3, NFS1]
R-HSA:6807878	COPI-mediated anterograde transport	REACTOME_Pathways_27.02.2019	8.77988e-07	2.05989e-06	0.000587549	0.000899309	[-1]	Group46	26.7327	27	[ACTR10, ACTR1A, ARCN1, ARF4, CAPZB, COG1, COG2, COG3, COG4, COG8, COPB2, COPE, COPZ1, DCTN2, DCTN3, DCTN4, DCTN5, DCTN6, DYNC1H1, DYNC1I2, GOSR2, NAPA, NSF, STX5, TUBA1C, TUBB8, YKT6]
R-HSA:199977	ER to Golgi Anterograde Transport	REACTOME_Pathways_27.02.2019	1.66531e-06	3.78786e-06	0.000587549	0.000899309	[-1]	Group46	22.7273	35	[ACTR10, ACTR1A, ARCN1, ARF4, CAPZB, COG1, COG2, COG3, COG4, COG8, COPB2, COPE, COPZ1, DCTN2, DCTN3, DCTN4, DCTN5, DCTN6, DYNC1H1, DYNC1I2, GOSR2, NAPA, NSF, PPP6C, PREB, SEC13, SEC16A, STX5, TRAPPC1, TRAPPC3, TRAPPC4, TRAPPC5, TUBA1C, TUBB8, YKT6]
R-HSA:6811438	Intra-Golgi traffic	REACTOME_Pathways_27.02.2019	0.00877139	0.0143902	0.000587549	0.000899309	[-1]	Group46	22.7273	10	[COG1, COG2, COG3, COG4, COG8, GOSR2, NAPA, NSF, STX5, YKT6]
R-HSA:6811440	Retrograde transport at the Trans-Golgi-Network	REACTOME_Pathways_27.02.2019	0.00674394	0.011201	0.000587549	0.000899309	[-1]	Group46	22.449	11	[ARFRP1, COG1, COG2, COG3, COG4, COG8, NAA35, NAPA, NSF, SYS1, VPS51]
R-HSA:948021	Transport to the Golgi and subsequent modification	REACTOME_Pathways_27.02.2019	5.11017e-05	0.000103907	0.000587549	0.000899309	[-1]	Group46	19.4595	36	[ACTR10, ACTR1A, ARCN1, ARF4, B4GALT3, CAPZB, COG1, COG2, COG3, COG4, COG8, COPB2, COPE, COPZ1, DCTN2, DCTN3, DCTN4, DCTN5, DCTN6, DYNC1H1, DYNC1I2, GOSR2, NAPA, NSF, PPP6C, PREB, SEC13, SEC16A, STX5, TRAPPC1, TRAPPC3, TRAPPC4, TRAPPC5, TUBA1C, TUBB8, YKT6]
R-HSA:204005	COPII-mediated vesicle transport	REACTOME_Pathways_27.02.2019	0.0210844	0.0329782	0.000587549	0.000899309	[-1]	Group46	19.1176	13	[GOSR2, NAPA, NSF, PPP6C, PREB, SEC13, SEC16A, STX5, TRAPPC1, TRAPPC3, TRAPPC4, TRAPPC5, YKT6]
R-HSA:1362409	Mitochondrial iron-sulfur cluster biogenesis	REACTOME_Pathways_27.02.2019	0.00081474	0.00148962	0.00081474	0.00122211	[-1]	Group10	46.1538	6	[FDXR, FXN, HSCB, ISCA2, LYRM4, NFS1]
R-HSA:1295596	Spry regulation of FGF signaling	REACTOME_Pathways_27.02.2019	0.01555	0.0250217	0.000898514	0.00132134	[-1]	Group58	31.25	5	[GRB2, PPP2CA, PPP2R1A, PTPN11, UBC]
R-HSA:113501	Inhibition of replication initiation of damaged DNA by RB1/E2F1	REACTOME_Pathways_27.02.2019	0.0318217	0.0475553	0.000898514	0.00132134	[-1]	Group58	30.7692	4	[POLA2, PPP2CA, PPP2R1A, PRIM1]
R-HSA:2995383	Initiation of Nuclear Envelope Reformation	REACTOME_Pathways_27.02.2019	0.0318217	0.0475553	0.000898514	0.00132134	[-1]	Group58	30.7692	4	[ANKLE2, BANF1, PPP2CA, PPP2R1A]
R-HSA:2995410	Nuclear Envelope Reassembly	REACTOME_Pathways_27.02.2019	0.0318217	0.0475553	0.000898514	0.00132134	[-1]	Group58	30.7692	4	[ANKLE2, BANF1, PPP2CA, PPP2R1A]
R-HSA:5654738	Signaling by FGFR2	REACTOME_Pathways_27.02.2019	0.00017754	0.000346306	0.000898514	0.00132134	[-1]	Group58	24.6575	18	[GRB2, GTF2F2, HNRNPH1, NCBP1, NCBP2, POLR2A, POLR2C, POLR2E, POLR2F, POLR2G, POLR2H, POLR2K, POLR2L, PPP2CA, PPP2R1A, PTBP1, PTPN11, UBC]
R-HSA:6804757	Regulation of TP53 Degradation	REACTOME_Pathways_27.02.2019	0.020803	0.0326141	0.000898514	0.00132134	[-1]	Group58	22.2222	8	[CCNA2, MLST8, MTOR, PDPK1, PPP2CA, PPP2R1A, UBC, USP7]
R-HSA:6806003	Regulation of TP53 Expression and Degradation	REACTOME_Pathways_27.02.2019	0.0243353	0.0372808	0.000898514	0.00132134	[-1]	Group58	21.6216	8	[CCNA2, MLST8, MTOR, PDPK1, PPP2CA, PPP2R1A, UBC, USP7]
R-HSA:190236	Signaling by FGFR	REACTOME_Pathways_27.02.2019	0.00178841	0.00316629	0.000898514	0.00132134	[-1]	Group58	20.6897	18	[GRB2, GTF2F2, HNRNPH1, NCBP1, NCBP2, POLR2A, POLR2C, POLR2E, POLR2F, POLR2G, POLR2H, POLR2K, POLR2L, PPP2CA, PPP2R1A, PTBP1, PTPN11, UBC]
R-HSA:199418	Negative regulation of the PI3K/AKT network	REACTOME_Pathways_27.02.2019	0.0331393	0.0491957	0.000898514	0.00132134	[-1]	Group58	3.66972	4	[GRB2, PPP2CA, PPP2R1A, PTPN11]
KEGG:04728	Dopaminergic synapse	KEGG_27.02.2019	0.006933	0.0114582	0.000898514	0.00132134	[-1]	Group58	3.05344	4	[ATF4, PPP1CA, PPP2CA, PPP2R1A]
R-HSA:202733	Cell surface interactions at the vascular wall	REACTOME_Pathways_27.02.2019	0.00349668	0.00603156	0.000898514	0.00132134	[-1]	Group58	2.89855	4	[GRB2, PPIA, PTPN11, SLC7A5]
KEGG:04072	Phospholipase D signaling pathway	KEGG_27.02.2019	0.00185936	0.00328323	0.000898514	0.00132134	[-1]	Group58	2.7027	4	[DNM2, GRB2, MTOR, PTPN11]
KEGG:04934	Cushing syndrome	KEGG_27.02.2019	0.000917503	0.0016639	0.000917503	0.00132332	[-1]	Group16	2.58065	4	[ARMC5, ATF4, CCND1, WDR5]
R-HSA:166208	mTORC1-mediated signalling	REACTOME_Pathways_27.02.2019	0.00105616	0.00189996	0.00105616	0.00149457	[-1]	Group03	34.7826	8	[EIF4G1, LAMTOR2, LAMTOR3, LAMTOR4, MLST8, MTOR, RPS6, RPTOR]
R-HSA:9010553	Regulation of expression of SLITs and ROBOs	REACTOME_Pathways_27.02.2019	4.48449e-45	1.88068e-43	0.00136662	0.00189808	[-1]	Group65	52.0468	89	[EIF4A3, EIF4G1, ELOB, ETF1, GSPT1, NCBP1, NCBP2, PABPC1, PSMA1, PSMA2, PSMA3, PSMA4, PSMA5, PSMA6, PSMA7, PSMB1, PSMB2, PSMB3, PSMB4, PSMB5, PSMB6, PSMB7, PSMC1, PSMC2, PSMC3, PSMC4, PSMC5, PSMC6, PSMD11, PSMD12, PSMD13, PSMD14, PSMD2, PSMD3, PSMD4, PSMD6, PSMD7, PSMD8, PSME1, RBM8A, RBX1, RPL10A, RPL12, RPL13, RPL13A, RPL14, RPL15, RPL18A, RPL19, RPL23, RPL24, RPL26, RPL27A, RPL28, RPL29, RPL3,…
R-HSA:156902	Peptide chain elongation	REACTOME_Pathways_27.02.2019	1.2855e-23	1.16564e-22	0.00136662	0.00189808	[-1]	Group65	51.6854	46	[EEF2, RPL10A, RPL12, RPL13, RPL13A, RPL14, RPL15, RPL18A, RPL19, RPL23, RPL24, RPL26, RPL27A, RPL28, RPL29, RPL3, RPL31, RPL35, RPL36, RPL36AL, RPL37, RPL37A, RPL38, RPL4, RPL7, RPL9, RPLP0, RPLP1, RPS11, RPS12, RPS13, RPS14, RPS15A, RPS16, RPS17, RPS18, RPS19, RPS21, RPS23, RPS24, RPS25, RPS28, RPS6, RPS7, RPS8, RPSA]
R-HSA:168273	Influenza Viral RNA Transcription and Replication	REACTOME_Pathways_27.02.2019	7.75417e-35	2.00117e-33	0.00136662	0.00189808	[-1]	Group65	49.6552	72	[GRSF1, GTF2F2, NDC1, NUP133, NUP153, NUP155, NUP160, NUP205, NUP214, NUP35, NUP43, NUP62, NUP85, NUP88, NUP98, POLR2A, POLR2C, POLR2E, POLR2F, POLR2G, POLR2H, POLR2K, POLR2L, RAE1, RPL10A, RPL12, RPL13, RPL13A, RPL14, RPL15, RPL18A, RPL19, RPL23, RPL24, RPL26, RPL27A, RPL28, RPL29, RPL3, RPL31, RPL35, RPL36, RPL36AL, RPL37, RPL37A, RPL38, RPL4, RPL7, RPL9, RPLP0, RPLP1, RPS11, RPS12, RPS13, RPS1…
R-HSA:168255	Influenza Life Cycle	REACTOME_Pathways_27.02.2019	2.63246e-34	6.30851e-33	0.00136662	0.00189808	[-1]	Group65	47.7419	74	[CLTC, GRSF1, GTF2F2, NDC1, NUP133, NUP153, NUP155, NUP160, NUP205, NUP214, NUP35, NUP43, NUP62, NUP85, NUP88, NUP98, POLR2A, POLR2C, POLR2E, POLR2F, POLR2G, POLR2H, POLR2K, POLR2L, RAE1, RPL10A, RPL12, RPL13, RPL13A, RPL14, RPL15, RPL18A, RPL19, RPL23, RPL24, RPL26, RPL27A, RPL28, RPL29, RPL3, RPL31, RPL35, RPL36, RPL36AL, RPL37, RPL37A, RPL38, RPL4, RPL7, RPL9, RPLP0, RPLP1, RPS11, RPS12, RPS13…
R-HSA:162599	Late Phase of HIV Life Cycle	REACTOME_Pathways_27.02.2019	1.05656e-31	2.08516e-30	0.00136662	0.00189808	[-1]	Group65	47.2603	69	[CCNH, CCNK, CDK9, CHMP2A, CHMP5, CHMP6, CHMP7, CTDP1, ELL, ELOB, ERCC2, ERCC3, GTF2A1, GTF2A2, GTF2B, GTF2E1, GTF2E2, GTF2F2, GTF2H1, GTF2H3, GTF2H4, MNAT1, NCBP1, NCBP2, NDC1, NELFA, NELFB, NELFE, NUP133, NUP153, NUP155, NUP160, NUP205, NUP214, NUP35, NUP43, NUP62, NUP85, NUP88, NUP98, POLR2A, POLR2C, POLR2E, POLR2F, POLR2G, POLR2H, POLR2K, POLR2L, PPIA, RAE1, RANGAP1, RCC1, RNGTT, RNMT, SEC13,…
R-HSA:162587	HIV Life Cycle	REACTOME_Pathways_27.02.2019	2.27074e-33	4.76145e-32	0.00136662	0.00189808	[-1]	Group65	46.5409	74	[BANF1, CCNH, CCNK, CDK9, CHMP2A, CHMP5, CHMP6, CHMP7, CTDP1, ELL, ELOB, ERCC2, ERCC3, FEN1, GTF2A1, GTF2A2, GTF2B, GTF2E1, GTF2E2, GTF2F2, GTF2H1, GTF2H3, GTF2H4, HMGA1, MNAT1, NCBP1, NCBP2, NDC1, NELFA, NELFB, NELFE, NUP133, NUP153, NUP155, NUP160, NUP205, NUP214, NUP35, NUP43, NUP62, NUP85, NUP88, NUP98, POLR2A, POLR2C, POLR2E, POLR2F, POLR2G, POLR2H, POLR2K, POLR2L, PPIA, RAE1, RANGAP1, RCC1,…
R-HSA:192823	Viral mRNA Translation	REACTOME_Pathways_27.02.2019	6.53688e-21	4.6171e-20	0.00136662	0.00189808	[-1]	Group65	46	46	[GRSF1, RPL10A, RPL12, RPL13, RPL13A, RPL14, RPL15, RPL18A, RPL19, RPL23, RPL24, RPL26, RPL27A, RPL28, RPL29, RPL3, RPL31, RPL35, RPL36, RPL36AL, RPL37, RPL37A, RPL38, RPL4, RPL7, RPL9, RPLP0, RPLP1, RPS11, RPS12, RPS13, RPS14, RPS15A, RPS16, RPS17, RPS18, RPS19, RPS21, RPS23, RPS24, RPS25, RPS28, RPS6, RPS7, RPS8, RPSA]
R-HSA:162909	Host Interactions of HIV factors	REACTOME_Pathways_27.02.2019	1.01813e-27	1.17787e-26	0.00136662	0.00189808	[-1]	Group65	45.9259	62	[ATP6V1H, BANF1, CDK9, ELOB, HMGA1, NDC1, NPM1, NUP133, NUP153, NUP155, NUP160, NUP205, NUP214, NUP35, NUP43, NUP62, NUP85, NUP88, NUP98, PPIA, PSMA1, PSMA2, PSMA3, PSMA4, PSMA5, PSMA6, PSMA7, PSMB1, PSMB2, PSMB3, PSMB4, PSMB5, PSMB6, PSMB7, PSMC1, PSMC2, PSMC3, PSMC4, PSMC5, PSMC6, PSMD11, PSMD12, PSMD13, PSMD14, PSMD2, PSMD3, PSMD4, PSMD6, PSMD7, PSMD8, PSME1, RAE1, RANGAP1, RBX1, RCC1, SEC13, …
R-HSA:162906	HIV Infection	REACTOME_Pathways_27.02.2019	1.67472e-48	8.64413e-47	0.00136662	0.00189808	[-1]	Group65	45.8333	110	[ATP6V1H, BANF1, CCNH, CCNK, CDK9, CHMP2A, CHMP5, CHMP6, CHMP7, CTDP1, ELL, ELOB, ERCC2, ERCC3, FEN1, GTF2A1, GTF2A2, GTF2B, GTF2E1, GTF2E2, GTF2F2, GTF2H1, GTF2H3, GTF2H4, HMGA1, MNAT1, NCBP1, NCBP2, NDC1, NELFA, NELFB, NELFE, NPM1, NUP133, NUP153, NUP155, NUP160, NUP205, NUP214, NUP35, NUP43, NUP62, NUP85, NUP88, NUP98, POLR2A, POLR2C, POLR2E, POLR2F, POLR2G, POLR2H, POLR2K, POLR2L, PPIA, PSMA1…
R-HSA:168254	Influenza Infection	REACTOME_Pathways_27.02.2019	1.2283e-33	2.74731e-32	0.00136662	0.00189808	[-1]	Group65	45.7831	76	[CLTC, CPSF4, GRSF1, GTF2F2, NDC1, NUP133, NUP153, NUP155, NUP160, NUP205, NUP214, NUP35, NUP43, NUP62, NUP85, NUP88, NUP98, PABPN1, POLR2A, POLR2C, POLR2E, POLR2F, POLR2G, POLR2H, POLR2K, POLR2L, RAE1, RPL10A, RPL12, RPL13, RPL13A, RPL14, RPL15, RPL18A, RPL19, RPL23, RPL24, RPL26, RPL27A, RPL28, RPL29, RPL3, RPL31, RPL35, RPL36, RPL36AL, RPL37, RPL37A, RPL38, RPL4, RPL7, RPL9, RPLP0, RPLP1, RPS1…
R-HSA:376176	Signaling by ROBO receptors	REACTOME_Pathways_27.02.2019	3.85417e-36	1.03446e-34	0.00136662	0.00189808	[-1]	Group65	41.7431	91	[CAP1, EIF4A3, EIF4G1, ELOB, ETF1, GSPT1, NCBP1, NCBP2, PABPC1, PFN1, PSMA1, PSMA2, PSMA3, PSMA4, PSMA5, PSMA6, PSMA7, PSMB1, PSMB2, PSMB3, PSMB4, PSMB5, PSMB6, PSMB7, PSMC1, PSMC2, PSMC3, PSMC4, PSMC5, PSMC6, PSMD11, PSMD12, PSMD13, PSMD14, PSMD2, PSMD3, PSMD4, PSMD6, PSMD7, PSMD8, PSME1, RBM8A, RBX1, RPL10A, RPL12, RPL13, RPL13A, RPL14, RPL15, RPL18A, RPL19, RPL23, RPL24, RPL26, RPL27A, RPL28, …
R-HSA:5663205	Infectious disease	REACTOME_Pathways_27.02.2019	3.73877e-56	2.28065e-54	0.00136662	0.00189808	[-1]	Group65	37.0455	163	[ATP6V1H, BANF1, CBLL1, CCNH, CCNK, CDK9, CHMP2A, CHMP5, CHMP6, CHMP7, CLTC, CPSF4, CTDP1, EEF2, ELL, ELOB, ERCC2, ERCC3, FEN1, GRB2, GRSF1, GTF2A1, GTF2A2, GTF2B, GTF2E1, GTF2E2, GTF2F2, GTF2H1, GTF2H3, GTF2H4, HGS, HMGA1, MNAT1, NCBP1, NCBP2, NDC1, NELFA, NELFB, NELFE, NPM1, NUP133, NUP153, NUP155, NUP160, NUP205, NUP214, NUP35, NUP43, NUP62, NUP85, NUP88, NUP98, PABPN1, POLR2A, POLR2C, POLR2E,…
R-HSA:71291	Metabolism of amino acids and derivatives	REACTOME_Pathways_27.02.2019	1.21728e-16	6.05031e-16	0.00136662	0.00189808	[-1]	Group65	24.3243	90	[DARS, IARS, KARS, LARS, MARS, NDUFAB1, PRODH2, PSMA1, PSMA2, PSMA3, PSMA4, PSMA5, PSMA6, PSMA7, PSMB1, PSMB2, PSMB3, PSMB4, PSMB5, PSMB6, PSMB7, PSMC1, PSMC2, PSMC3, PSMC4, PSMC5, PSMC6, PSMD11, PSMD12, PSMD13, PSMD14, PSMD2, PSMD3, PSMD4, PSMD6, PSMD7, PSMD8, PSME1, PSTK, QARS, RPL10A, RPL12, RPL13, RPL13A, RPL14, RPL15, RPL18A, RPL19, RPL23, RPL24, RPL26, RPL27A, RPL28, RPL29, RPL3, RPL31, RPL…
R-HSA:422475	Axon guidance	REACTOME_Pathways_27.02.2019	1.91702e-11	6.63051e-11	0.00136662	0.00189808	[-1]	Group65	18.9873	105	[ACTB, ACTG1, ACTR2, ARPC3, CACNB3, CAP1, CLTC, CSNK2B, DNM2, EIF4A3, EIF4G1, ELOB, ETF1, GRB2, GSPT1, NCBP1, NCBP2, PABPC1, PFN1, PSMA1, PSMA2, PSMA3, PSMA4, PSMA5, PSMA6, PSMA7, PSMB1, PSMB2, PSMB3, PSMB4, PSMB5, PSMB6, PSMB7, PSMC1, PSMC2, PSMC3, PSMC4, PSMC5, PSMC6, PSMD11, PSMD12, PSMD13, PSMD14, PSMD2, PSMD3, PSMD4, PSMD6, PSMD7, PSMD8, PSME1, PTK2, PTPN11, RBM8A, RBX1, RPL10A, RPL12, RPL13…
R-HSA:1643685	Disease	REACTOME_Pathways_27.02.2019	1.18166e-16	5.91712e-16	0.00136662	0.00189808	[-1]	Group65	17.3642	195	[ACTB, ACTG1, ALG1, ALG14, ALG2, ATP6V1H, BANF1, CBLL1, CCDC59, CCNH, CCNK, CDK9, CHMP2A, CHMP5, CHMP6, CHMP7, CLTC, CPSF4, CPSF6, CSNK1A1, CTDP1, CUL1, DHDDS, DOLK, DPAGT1, DPM2, EEF2, ELL, ELOB, ERCC2, ERCC3, FDXR, FEN1, FGFR1OP, GRB2, GRSF1, GTF2A1, GTF2A2, GTF2B, GTF2E1, GTF2E2, GTF2F2, GTF2H1, GTF2H3, GTF2H4, HDAC3, HGS, HMGA1, MLST8, MNAT1, MTOR, MYC, NCBP1, NCBP2, NDC1, NELFA, NELFB, NELFE…
R-HSA:5663202	Diseases of signal transduction	REACTOME_Pathways_27.02.2019	7.51116e-06	1.63636e-05	0.00136662	0.00189808	[-1]	Group65	17.0103	66	[ACTB, ACTG1, CPSF6, CSNK1A1, CUL1, FGFR1OP, GRB2, GTF2F2, HDAC3, MLST8, MTOR, MYC, NCBP1, NCBP2, PDPK1, PHB, POLR2A, POLR2C, POLR2E, POLR2F, POLR2G, POLR2H, POLR2K, POLR2L, PPP2CA, PPP2R1A, PSMA1, PSMA2, PSMA3, PSMA4, PSMA5, PSMA6, PSMA7, PSMB1, PSMB2, PSMB3, PSMB4, PSMB5, PSMB6, PSMB7, PSMC1, PSMC2, PSMC3, PSMC4, PSMC5, PSMC6, PSMD11, PSMD12, PSMD13, PSMD14, PSMD2, PSMD3, PSMD4, PSMD6, PSMD7, P…
R-HSA:1266738	Developmental Biology	REACTOME_Pathways_27.02.2019	0.000103743	0.000206563	0.00136662	0.00189808	[-1]	Group65	13.2776	143	[ACTB, ACTG1, ACTR2, ARPC3, CACNB3, CAP1, CLTC, CSNK2B, CTCF, DNM2, EIF4A3, EIF4G1, ELOB, ETF1, GRB2, GSPT1, H2AFX, H2AFZ, H3F3A, HDAC3, HIST1H2BC, HIST1H2BJ, HIST1H2BL, HIST2H2AC, HIST2H2BE, HIST2H3D, KRT8, MED10, MED11, MED17, MED18, MED20, MED21, MED26, MED28, MED29, MED30, MED6, MED7, MED8, MED9, NCBP1, NCBP2, PABPC1, PFN1, POLR2A, POLR2C, POLR2E, POLR2F, POLR2G, POLR2H, POLR2K, POLR2L, PSMA1…
R-HSA:917729	Endosomal Sorting Complex Required For Transport (ESCRT)	REACTOME_Pathways_27.02.2019	0.000672109	0.00123558	0.00151038	0.00205961	[-1]	Group19	31.25	10	[CHMP2A, CHMP5, CHMP6, CHMP7, HGS, SNF8, TSG101, UBC, VPS25, VPS28]
R-HSA:162588	Budding and maturation of HIV virion	REACTOME_Pathways_27.02.2019	0.01765	0.0280644	0.00151038	0.00205961	[-1]	Group19	22.8571	8	[CHMP2A, CHMP5, CHMP6, CHMP7, PPIA, TSG101, UBC, VPS28]
R-HSA:390450	Folding of actin by CCT/TriC	REACTOME_Pathways_27.02.2019	0.000129198	0.000254228	0.00201184	0.00269442	[-1]	Group44	60	6	[ACTB, CCT2, CCT3, CCT4, CCT6A, CCT8]
R-HSA:389957	Prefoldin mediated transfer of substrate to CCT/TriC	REACTOME_Pathways_27.02.2019	3.37662e-05	7.01458e-05	0.00201184	0.00269442	[-1]	Group44	39.2857	11	[ACTB, CCT2, CCT3, CCT4, CCT6A, CCT8, PFDN1, PFDN2, PFDN5, PFDN6, TUBA1C]
R-HSA:389958	Cooperation of Prefoldin and TriC/CCT in actin and tubulin folding	REACTOME_Pathways_27.02.2019	0.000140442	0.000274742	0.00201184	0.00269442	[-1]	Group44	34.375	11	[ACTB, CCT2, CCT3, CCT4, CCT6A, CCT8, PFDN1, PFDN2, PFDN5, PFDN6, TUBA1C]
R-HSA:389977	Post-chaperonin tubulin folding pathway	REACTOME_Pathways_27.02.2019	0.0164511	0.0262827	0.00201184	0.00269442	[-1]	Group44	27.2727	6	[ARL2, TBCA, TBCC, TBCD, TBCE, TUBA1C]
R-HSA:389960	Formation of tubulin folding intermediates by CCT/TriC	REACTOME_Pathways_27.02.2019	0.0303518	0.0456638	0.00201184	0.00269442	[-1]	Group44	24	6	[CCT2, CCT3, CCT4, CCT6A, CCT8, TUBA1C]
R-HSA:391251	Protein folding	REACTOME_Pathways_27.02.2019	0.00201184	0.00353388	0.00201184	0.00269442	[-1]	Group44	19.802	20	[ACTB, ARL2, CCT2, CCT3, CCT4, CCT6A, CCT8, CSNK2B, HDAC3, NOP56, PFDN1, PFDN2, PFDN5, PFDN6, TBCA, TBCC, TBCD, TBCE, TUBA1C, XRN2]
R-HSA:2514853	Condensation of Prometaphase Chromosomes	REACTOME_Pathways_27.02.2019	0.00248972	0.00435053	0.00248972	0.00327595	[-1]	Group11	45.4545	5	[CSNK2B, NCAPG, NCAPH, SMC2, SMC4]
R-HSA:1362277	Transcription of E2F targets under negative control by DREAM complex	REACTOME_Pathways_27.02.2019	0.0323779	0.048279	0.00281391	0.00363867	[-1]	Group26	26.3158	5	[CDC6, MYC, PCNA, RBBP4, TOP2A]
R-HSA:539107	Activation of E2F1 target genes at G1/S	REACTOME_Pathways_27.02.2019	0.0159722	0.0256395	0.00281391	0.00363867	[-1]	Group26	25	7	[CDC45, CDC6, CDT1, ORC1, PCNA, RBBP4, RRM2]
R-HSA:69205	G1/S-Specific Transcription	REACTOME_Pathways_27.02.2019	0.0159722	0.0256395	0.00281391	0.00363867	[-1]	Group26	25	7	[CDC45, CDC6, CDT1, ORC1, PCNA, RBBP4, RRM2]
R-HSA:3781860	Diseases associated with N-glycosylation of proteins	REACTOME_Pathways_27.02.2019	0.0202915	0.0318867	0.00315642	0.0040124	[-1]	Group24	29.4118	5	[ALG1, ALG14, ALG2, DPAGT1, RFT1]
KEGG:00510	N-Glycan biosynthesis	KEGG_27.02.2019	0.00674394	0.011201	0.00315642	0.0040124	[-1]	Group24	22.449	11	[ALG1, ALG14, ALG2, B4GALT3, DAD1, DDOST, DOLK, DPAGT1, DPM2, RPN1, RPN2]
R-HSA:1483257	Phospholipid metabolism	REACTOME_Pathways_27.02.2019	0.00472688	0.00809117	0.00472688	0.0059086	[-1]	Group21	4.24528	9	[CDIPT, CSNK2B, PCYT1A, PGS1, PI4KA, PIK3C3, PIK3R4, PTPMT1, SACM1L]
R-HSA:1483206	Glycerophospholipid biosynthesis	REACTOME_Pathways_27.02.2019	0.0238325	0.0368469	0.00472688	0.0059086	[-1]	Group21	3.87597	5	[CDIPT, CSNK2B, PCYT1A, PGS1, PTPMT1]
KEGG:05152	Tuberculosis	KEGG_27.02.2019	0.00495582	0.00846146	0.00495582	0.00609322	[-1]	Group01	3.91061	7	[ATP6V0B, ATP6V1H, CYCS, HSPA9, HSPD1, NFYB, PIK3C3]
KEGG:00190	Oxidative phosphorylation	KEGG_27.02.2019	9.61366e-09	2.65464e-08	0.00528091	0.0063882	[-1]	Group51	27.0677	36	[ATP5F1B, ATP5F1D, ATP5F1E, ATP5MC1, ATP5ME, ATP5PB, ATP5PO, ATP6V0B, ATP6V1A, ATP6V1E1, ATP6V1F, ATP6V1G1, ATP6V1H, COX15, COX17, COX5A, COX5B, COX6C, COX7C, NDUFA6, NDUFA8, NDUFAB1, NDUFB10, NDUFB3, NDUFB6, NDUFB7, NDUFB8, NDUFS2, NDUFS3, PPA1, PPA2, SDHC, SDHD, UQCRC1, UQCRC2, UQCRFS1]
R-HSA:163200	Respiratory electron transport, ATP synthesis by chemiosmotic coupling, and heat production by uncoupling proteins.	REACTOME_Pathways_27.02.2019	2.19195e-06	4.93557e-06	0.00528091	0.0063882	[-1]	Group51	24.1935	30	[ATP5F1B, ATP5F1D, ATP5F1E, ATP5MC1, ATP5ME, ATP5PB, ATP5PO, COX18, COX5A, COX5B, COX6C, COX7C, CYCS, LRPPRC, NDUFA6, NDUFA8, NDUFAB1, NDUFAF3, NDUFB10, NDUFB3, NDUFB6, NDUFB7, NDUFB8, NDUFS2, NDUFS3, SDHC, SDHD, UQCRC1, UQCRC2, UQCRFS1]
R-HSA:611105	Respiratory electron transport	REACTOME_Pathways_27.02.2019	0.000118956	0.000235456	0.00528091	0.0063882	[-1]	Group51	22.7723	23	[COX18, COX5A, COX5B, COX6C, COX7C, CYCS, LRPPRC, NDUFA6, NDUFA8, NDUFAB1, NDUFAF3, NDUFB10, NDUFB3, NDUFB6, NDUFB7, NDUFB8, NDUFS2, NDUFS3, SDHC, SDHD, UQCRC1, UQCRC2, UQCRFS1]
KEGG:05016	Huntington disease	KEGG_27.02.2019	2.28252e-07	5.58968e-07	0.00528091	0.0063882	[-1]	Group51	22.2798	43	[ATP5F1B, ATP5F1D, ATP5F1E, ATP5MC1, ATP5PB, ATP5PO, CLTC, COX5A, COX5B, COX6C, COX7C, CYCS, DCTN2, DCTN4, NDUFA6, NDUFA8, NDUFAB1, NDUFB10, NDUFB3, NDUFB6, NDUFB7, NDUFB8, NDUFS2, NDUFS3, POLR2A, POLR2C, POLR2E, POLR2F, POLR2G, POLR2H, POLR2K, POLR2L, RCOR1, SDHC, SDHD, SIN3A, SOD1, SOD2, TBP, UQCRC1, UQCRC2, UQCRFS1, VDAC1]
R-HSA:6799198	Complex I biogenesis	REACTOME_Pathways_27.02.2019	0.0195521	0.0307969	0.00528091	0.0063882	[-1]	Group51	20	11	[NDUFA6, NDUFA8, NDUFAB1, NDUFAF3, NDUFB10, NDUFB3, NDUFB6, NDUFB7, NDUFB8, NDUFS2, NDUFS3]
KEGG:05012	Parkinson disease	KEGG_27.02.2019	0.000860332	0.0015687	0.00528091	0.0063882	[-1]	Group51	19.0141	27	[ATP5F1B, ATP5F1D, ATP5F1E, ATP5MC1, ATP5PB, ATP5PO, COX5A, COX5B, COX6C, COX7C, CYCS, NDUFA6, NDUFA8, NDUFAB1, NDUFB10, NDUFB3, NDUFB6, NDUFB7, NDUFB8, NDUFS2, NDUFS3, SDHC, SDHD, UQCRC1, UQCRC2, UQCRFS1, VDAC1]
R-HSA:1428517	The citric acid (TCA) cycle and respiratory electron transport	REACTOME_Pathways_27.02.2019	0.000461888	0.000860907	0.00528091	0.0063882	[-1]	Group51	18.2857	32	[ATP5F1B, ATP5F1D, ATP5F1E, ATP5MC1, ATP5ME, ATP5PB, ATP5PO, COX18, COX5A, COX5B, COX6C, COX7C, CS, CYCS, LRPPRC, NDUFA6, NDUFA8, NDUFAB1, NDUFAF3, NDUFB10, NDUFB3, NDUFB6, NDUFB7, NDUFB8, NDUFS2, NDUFS3, SDHC, SDHD, UQCRC1, UQCRC2, UQCRFS1, VDAC1]
KEGG:04714	Thermogenesis	KEGG_27.02.2019	0.000309601	0.000586842	0.00528091	0.0063882	[-1]	Group51	17.316	40	[ACTB, ACTG1, ACTL6A, ATP5F1B, ATP5F1D, ATP5F1E, ATP5MC1, ATP5ME, ATP5PB, ATP5PO, COX15, COX17, COX18, COX19, COX5A, COX5B, COX6C, COX7C, GRB2, MLST8, MTOR, NDUFA6, NDUFA8, NDUFAB1, NDUFAF3, NDUFB10, NDUFB3, NDUFB6, NDUFB7, NDUFB8, NDUFS2, NDUFS3, RPS6, RPTOR, SDHC, SDHD, SMARCB1, UQCRC1, UQCRC2, UQCRFS1]
KEGG:05010	Alzheimer disease	KEGG_27.02.2019	0.00388562	0.00668525	0.00528091	0.0063882	[-1]	Group51	16.9591	29	[ATP2A2, ATP5F1B, ATP5F1D, ATP5F1E, ATP5MC1, ATP5PB, ATP5PO, COX5A, COX5B, COX6C, COX7C, CYCS, GAPDH, NAE1, NDUFA6, NDUFA8, NDUFAB1, NDUFB10, NDUFB3, NDUFB6, NDUFB7, NDUFB8, NDUFS2, NDUFS3, SDHC, SDHD, UQCRC1, UQCRC2, UQCRFS1]
KEGG:05203	Viral carcinogenesis	KEGG_27.02.2019	0.00555187	0.00933661	0.00555187	0.00660937	[-1]	Group07	15.9204	32	[ATF4, CCNA2, CCND1, CDC20, CHD4, CHEK1, DDB1, DNAJA3, GRB2, GTF2A1, GTF2A2, GTF2B, GTF2E1, GTF2E2, GTF2H1, GTF2H3, GTF2H4, HDAC3, HIST1H2BC, HIST1H2BJ, HIST1H2BL, HIST2H2BE, HNRNPK, MRPS18B, PKM, PSMC1, SNW1, SRF, STAT5A, TBP, UBR4, USP7]
R-HSA:73887	Death Receptor Signalling	REACTOME_Pathways_27.02.2019	0.00679684	0.0112609	0.00679684	0.00796505	[-1]	Group04	3.4965	5	[AATF, CFLAR, HDAC3, RACK1, UBC]
R-HSA:162592	Integration of provirus	REACTOME_Pathways_27.02.2019	0.00587139	0.0098247	0.0101199	0.0116769	[-1]	Group27	38.4615	5	[BANF1, HMGA1, PPIA, XRCC5, XRCC6]
R-HSA:164843	2-LTR circle formation	REACTOME_Pathways_27.02.2019	0.0172002	0.027414	0.0101199	0.0116769	[-1]	Group27	36.3636	4	[BANF1, HMGA1, XRCC5, XRCC6]
R-HSA:162594	Early Phase of HIV Life Cycle	REACTOME_Pathways_27.02.2019	0.0101199	0.0165218	0.0101199	0.0116769	[-1]	Group27	30	6	[BANF1, FEN1, HMGA1, PPIA, XRCC5, XRCC6]
KEGG:03050	Proteasome	KEGG_27.02.2019	7.13321e-23	6.21609e-22	0.011152	0.0126727	[-1]	Group75	71.1111	32	[PSMA1, PSMA2, PSMA3, PSMA4, PSMA5, PSMA6, PSMA7, PSMB1, PSMB2, PSMB3, PSMB4, PSMB5, PSMB6, PSMB7, PSMC1, PSMC2, PSMC3, PSMC4, PSMC5, PSMC6, PSMD11, PSMD12, PSMD13, PSMD14, PSMD2, PSMD3, PSMD4, PSMD6, PSMD7, PSMD8, PSME1, SEM1]
R-HSA:68949	Orc1 removal from chromatin	REACTOME_Pathways_27.02.2019	2.07899e-33	4.50002e-32	0.011152	0.0126727	[-1]	Group75	69.0141	49	[CCNA2, CDC6, CDT1, CUL1, MCM2, MCM3, MCM4, MCM5, MCM6, MCM7, ORC1, ORC3, ORC4, ORC5, PSMA1, PSMA2, PSMA3, PSMA4, PSMA5, PSMA6, PSMA7, PSMB1, PSMB2, PSMB3, PSMB4, PSMB5, PSMB6, PSMB7, PSMC1, PSMC2, PSMC3, PSMC4, PSMC5, PSMC6, PSMD11, PSMD12, PSMD13, PSMD14, PSMD2, PSMD3, PSMD4, PSMD6, PSMD7, PSMD8, PSME1, RBX1, SEM1, SKP1, UBC]
R-HSA:69190	DNA strand elongation	REACTOME_Pathways_27.02.2019	1.29104e-15	5.77523e-15	0.011152	0.0126727	[-1]	Group75	68.75	22	[CDC45, FEN1, GINS1, GINS2, GINS3, MCM2, MCM3, MCM4, MCM5, MCM6, MCM7, PCNA, POLA2, POLD1, POLD2, POLD3, PRIM1, RFC2, RFC3, RFC5, RPA2, RPA3]
R-HSA:174084	Autodegradation of Cdh1 by Cdh1:APC/C	REACTOME_Pathways_27.02.2019	7.53563e-28	9.0293e-27	0.011152	0.0126727	[-1]	Group75	66.6667	42	[ANAPC1, ANAPC10, ANAPC11, ANAPC15, ANAPC4, ANAPC5, CDC16, CDC23, CDC26, PSMA1, PSMA2, PSMA3, PSMA4, PSMA5, PSMA6, PSMA7, PSMB1, PSMB2, PSMB3, PSMB4, PSMB5, PSMB6, PSMB7, PSMC1, PSMC2, PSMC3, PSMC4, PSMC5, PSMC6, PSMD11, PSMD12, PSMD13, PSMD14, PSMD2, PSMD3, PSMD4, PSMD6, PSMD7, PSMD8, PSME1, SEM1, UBC]
R-HSA:8854050	FBXL7 down-regulates AURKA during mitotic entry and in early mitosis	REACTOME_Pathways_27.02.2019	4.81523e-24	4.55073e-23	0.011152	0.0126727	[-1]	Group75	66.6667	36	[CUL1, PSMA1, PSMA2, PSMA3, PSMA4, PSMA5, PSMA6, PSMA7, PSMB1, PSMB2, PSMB3, PSMB4, PSMB5, PSMB6, PSMB7, PSMC1, PSMC2, PSMC3, PSMC4, PSMC5, PSMC6, PSMD11, PSMD12, PSMD13, PSMD14, PSMD2, PSMD3, PSMD4, PSMD6, PSMD7, PSMD8, PSME1, RBX1, SEM1, SKP1, UBC]
R-HSA:9604323	Negative regulation of NOTCH4 signaling	REACTOME_Pathways_27.02.2019	4.81523e-24	4.55073e-23	0.011152	0.0126727	[-1]	Group75	66.6667	36	[CUL1, PSMA1, PSMA2, PSMA3, PSMA4, PSMA5, PSMA6, PSMA7, PSMB1, PSMB2, PSMB3, PSMB4, PSMB5, PSMB6, PSMB7, PSMC1, PSMC2, PSMC3, PSMC4, PSMC5, PSMC6, PSMD11, PSMD12, PSMD13, PSMD14, PSMD2, PSMD3, PSMD4, PSMD6, PSMD7, PSMD8, PSME1, RBX1, SEM1, SKP1, UBC]
R-HSA:68867	Assembly of the pre-replicative complex	REACTOME_Pathways_27.02.2019	1.52959e-29	2.18373e-28	0.011152	0.0126727	[-1]	Group75	66.1765	45	[CDC6, CDT1, MCM2, MCM3, MCM4, MCM5, MCM6, MCM7, ORC1, ORC3, ORC4, ORC5, PSMA1, PSMA2, PSMA3, PSMA4, PSMA5, PSMA6, PSMA7, PSMB1, PSMB2, PSMB3, PSMB4, PSMB5, PSMB6, PSMB7, PSMC1, PSMC2, PSMC3, PSMC4, PSMC5, PSMC6, PSMD11, PSMD12, PSMD13, PSMD14, PSMD2, PSMD3, PSMD4, PSMD6, PSMD7, PSMD8, PSME1, SEM1, UBC]
R-HSA:68827	CDT1 association with the CDC6:ORC:origin complex	REACTOME_Pathways_27.02.2019	9.83281e-26	1.03091e-24	0.011152	0.0126727	[-1]	Group75	66.1017	39	[CDC6, CDT1, ORC1, ORC3, ORC4, ORC5, PSMA1, PSMA2, PSMA3, PSMA4, PSMA5, PSMA6, PSMA7, PSMB1, PSMB2, PSMB3, PSMB4, PSMB5, PSMB6, PSMB7, PSMC1, PSMC2, PSMC3, PSMC4, PSMC5, PSMC6, PSMD11, PSMD12, PSMD13, PSMD14, PSMD2, PSMD3, PSMD4, PSMD6, PSMD7, PSMD8, PSME1, SEM1, UBC]
R-HSA:211733	Regulation of activated PAK-2p34 by proteasome mediated degradation	REACTOME_Pathways_27.02.2019	6.22698e-22	4.80265e-21	0.011152	0.0126727	[-1]	Group75	66	33	[PSMA1, PSMA2, PSMA3, PSMA4, PSMA5, PSMA6, PSMA7, PSMB1, PSMB2, PSMB3, PSMB4, PSMB5, PSMB6, PSMB7, PSMC1, PSMC2, PSMC3, PSMC4, PSMC5, PSMC6, PSMD11, PSMD12, PSMD13, PSMD14, PSMD2, PSMD3, PSMD4, PSMD6, PSMD7, PSMD8, PSME1, SEM1, UBC]
R-HSA:174113	SCF-beta-TrCP mediated degradation of Emi1	REACTOME_Pathways_27.02.2019	1.26481e-23	1.16258e-22	0.011152	0.0126727	[-1]	Group75	65.4545	36	[CDC20, CUL1, PSMA1, PSMA2, PSMA3, PSMA4, PSMA5, PSMA6, PSMA7, PSMB1, PSMB2, PSMB3, PSMB4, PSMB5, PSMB6, PSMB7, PSMC1, PSMC2, PSMC3, PSMC4, PSMC5, PSMC6, PSMD11, PSMD12, PSMD13, PSMD14, PSMD2, PSMD3, PSMD4, PSMD6, PSMD7, PSMD8, PSME1, SEM1, SKP1, UBC]
R-HSA:180534	Vpu mediated degradation of CD4	REACTOME_Pathways_27.02.2019	2.33537e-22	1.91101e-21	0.011152	0.0126727	[-1]	Group75	65.3846	34	[PSMA1, PSMA2, PSMA3, PSMA4, PSMA5, PSMA6, PSMA7, PSMB1, PSMB2, PSMB3, PSMB4, PSMB5, PSMB6, PSMB7, PSMC1, PSMC2, PSMC3, PSMC4, PSMC5, PSMC6, PSMD11, PSMD12, PSMD13, PSMD14, PSMD2, PSMD3, PSMD4, PSMD6, PSMD7, PSMD8, PSME1, SEM1, SKP1, UBC]
R-HSA:69229	Ubiquitin-dependent degradation of Cyclin D1	REACTOME_Pathways_27.02.2019	2.33537e-22	1.91101e-21	0.011152	0.0126727	[-1]	Group75	65.3846	34	[CCND1, PSMA1, PSMA2, PSMA3, PSMA4, PSMA5, PSMA6, PSMA7, PSMB1, PSMB2, PSMB3, PSMB4, PSMB5, PSMB6, PSMB7, PSMC1, PSMC2, PSMC3, PSMC4, PSMC5, PSMC6, PSMD11, PSMD12, PSMD13, PSMD14, PSMD2, PSMD3, PSMD4, PSMD6, PSMD7, PSMD8, PSME1, SEM1, UBC]
R-HSA:75815	Ubiquitin-dependent degradation of Cyclin D	REACTOME_Pathways_27.02.2019	2.33537e-22	1.91101e-21	0.011152	0.0126727	[-1]	Group75	65.3846	34	[CCND1, PSMA1, PSMA2, PSMA3, PSMA4, PSMA5, PSMA6, PSMA7, PSMB1, PSMB2, PSMB3, PSMB4, PSMB5, PSMB6, PSMB7, PSMC1, PSMC2, PSMC3, PSMC4, PSMC5, PSMC6, PSMD11, PSMD12, PSMD13, PSMD14, PSMD2, PSMD3, PSMD4, PSMD6, PSMD7, PSMD8, PSME1, SEM1, UBC]
R-HSA:174184	Cdc20:Phospho-APC/C mediated degradation of Cyclin A	REACTOME_Pathways_27.02.2019	2.14191e-30	3.34238e-29	0.011152	0.0126727	[-1]	Group75	65.2778	47	[ANAPC1, ANAPC10, ANAPC11, ANAPC15, ANAPC4, ANAPC5, BUB1B, BUB3, CCNA2, CDC16, CDC20, CDC23, CDC26, MAD2L1, PSMA1, PSMA2, PSMA3, PSMA4, PSMA5, PSMA6, PSMA7, PSMB1, PSMB2, PSMB3, PSMB4, PSMB5, PSMB6, PSMB7, PSMC1, PSMC2, PSMC3, PSMC4, PSMC5, PSMC6, PSMD11, PSMD12, PSMD13, PSMD14, PSMD2, PSMD3, PSMD4, PSMD6, PSMD7, PSMD8, PSME1, SEM1, UBC]
R-HSA:141405	Inhibition of the proteolytic activity of APC/C required for the onset of anaphase by mitotic spindle checkpoint components	REACTOME_Pathways_27.02.2019	2.8702e-09	8.30132e-09	0.011152	0.0126727	[-1]	Group75	65	13	[ANAPC1, ANAPC10, ANAPC11, ANAPC15, ANAPC4, ANAPC5, BUB1B, BUB3, CDC16, CDC20, CDC23, CDC26, MAD2L1]
R-HSA:141430	Inactivation of APC/C via direct inhibition of the APC/C complex	REACTOME_Pathways_27.02.2019	2.8702e-09	8.30132e-09	0.011152	0.0126727	[-1]	Group75	65	13	[ANAPC1, ANAPC10, ANAPC11, ANAPC15, ANAPC4, ANAPC5, BUB1B, BUB3, CDC16, CDC20, CDC23, CDC26, MAD2L1]
R-HSA:69052	Switching of origins to a post-replicative state	REACTOME_Pathways_27.02.2019	8.72385e-37	2.43904e-35	0.011152	0.0126727	[-1]	Group75	64.4444	58	[ANAPC1, ANAPC10, ANAPC11, ANAPC15, ANAPC4, ANAPC5, CCNA2, CDC16, CDC23, CDC26, CDC6, CDT1, CUL1, MCM2, MCM3, MCM4, MCM5, MCM6, MCM7, ORC1, ORC3, ORC4, ORC5, PSMA1, PSMA2, PSMA3, PSMA4, PSMA5, PSMA6, PSMA7, PSMB1, PSMB2, PSMB3, PSMB4, PSMB5, PSMB6, PSMB7, PSMC1, PSMC2, PSMC3, PSMC4, PSMC5, PSMC6, PSMD11, PSMD12, PSMD13, PSMD14, PSMD2, PSMD3, PSMD4, PSMD6, PSMD7, PSMD8, PSME1, RBX1, SEM1, SKP1, UB…
R-HSA:179419	APC:Cdc20 mediated degradation of cell cycle proteins prior to satisfation of the cell cycle checkpoint	REACTOME_Pathways_27.02.2019	5.45791e-30	8.13835e-29	0.011152	0.0126727	[-1]	Group75	64.3836	47	[ANAPC1, ANAPC10, ANAPC11, ANAPC15, ANAPC4, ANAPC5, BUB1B, BUB3, CCNA2, CDC16, CDC20, CDC23, CDC26, MAD2L1, PSMA1, PSMA2, PSMA3, PSMA4, PSMA5, PSMA6, PSMA7, PSMB1, PSMB2, PSMB3, PSMB4, PSMB5, PSMB6, PSMB7, PSMC1, PSMC2, PSMC3, PSMC4, PSMC5, PSMC6, PSMD11, PSMD12, PSMD13, PSMD14, PSMD2, PSMD3, PSMD4, PSMD6, PSMD7, PSMD8, PSME1, SEM1, UBC]
R-HSA:174154	APC/C:Cdc20 mediated degradation of Securin	REACTOME_Pathways_27.02.2019	1.87972e-27	2.13778e-26	0.011152	0.0126727	[-1]	Group75	64.1791	43	[ANAPC1, ANAPC10, ANAPC11, ANAPC15, ANAPC4, ANAPC5, CDC16, CDC20, CDC23, CDC26, PSMA1, PSMA2, PSMA3, PSMA4, PSMA5, PSMA6, PSMA7, PSMB1, PSMB2, PSMB3, PSMB4, PSMB5, PSMB6, PSMB7, PSMC1, PSMC2, PSMC3, PSMC4, PSMC5, PSMC6, PSMD11, PSMD12, PSMD13, PSMD14, PSMD2, PSMD3, PSMD4, PSMD6, PSMD7, PSMD8, PSME1, SEM1, UBC]
R-HSA:169911	Regulation of Apoptosis	REACTOME_Pathways_27.02.2019	5.91129e-22	4.66644e-21	0.011152	0.0126727	[-1]	Group75	64.1509	34	[OPA1, PSMA1, PSMA2, PSMA3, PSMA4, PSMA5, PSMA6, PSMA7, PSMB1, PSMB2, PSMB3, PSMB4, PSMB5, PSMB6, PSMB7, PSMC1, PSMC2, PSMC3, PSMC4, PSMC5, PSMC6, PSMD11, PSMD12, PSMD13, PSMD14, PSMD2, PSMD3, PSMD4, PSMD6, PSMD7, PSMD8, PSME1, SEM1, UBC]
R-HSA:69601	Ubiquitin Mediated Degradation of Phosphorylated Cdc25A	REACTOME_Pathways_27.02.2019	5.91129e-22	4.66644e-21	0.011152	0.0126727	[-1]	Group75	64.1509	34	[CHEK1, PSMA1, PSMA2, PSMA3, PSMA4, PSMA5, PSMA6, PSMA7, PSMB1, PSMB2, PSMB3, PSMB4, PSMB5, PSMB6, PSMB7, PSMC1, PSMC2, PSMC3, PSMC4, PSMC5, PSMC6, PSMD11, PSMD12, PSMD13, PSMD14, PSMD2, PSMD3, PSMD4, PSMD6, PSMD7, PSMD8, PSME1, SEM1, UBC]
R-HSA:69610	p53-Independent DNA Damage Response	REACTOME_Pathways_27.02.2019	5.91129e-22	4.66644e-21	0.011152	0.0126727	[-1]	Group75	64.1509	34	[CHEK1, PSMA1, PSMA2, PSMA3, PSMA4, PSMA5, PSMA6, PSMA7, PSMB1, PSMB2, PSMB3, PSMB4, PSMB5, PSMB6, PSMB7, PSMC1, PSMC2, PSMC3, PSMC4, PSMC5, PSMC6, PSMD11, PSMD12, PSMD13, PSMD14, PSMD2, PSMD3, PSMD4, PSMD6, PSMD7, PSMD8, PSME1, SEM1, UBC]
R-HSA:69613	p53-Independent G1/S DNA damage checkpoint	REACTOME_Pathways_27.02.2019	5.91129e-22	4.66644e-21	0.011152	0.0126727	[-1]	Group75	64.1509	34	[CHEK1, PSMA1, PSMA2, PSMA3, PSMA4, PSMA5, PSMA6, PSMA7, PSMB1, PSMB2, PSMB3, PSMB4, PSMB5, PSMB6, PSMB7, PSMC1, PSMC2, PSMC3, PSMC4, PSMC5, PSMC6, PSMD11, PSMD12, PSMD13, PSMD14, PSMD2, PSMD3, PSMD4, PSMD6, PSMD7, PSMD8, PSME1, SEM1, UBC]
R-HSA:1236978	Cross-presentation of soluble exogenous antigens (endosomes)	REACTOME_Pathways_27.02.2019	1.08539e-20	7.3565e-20	0.011152	0.0126727	[-1]	Group75	64	32	[PSMA1, PSMA2, PSMA3, PSMA4, PSMA5, PSMA6, PSMA7, PSMB1, PSMB2, PSMB3, PSMB4, PSMB5, PSMB6, PSMB7, PSMC1, PSMC2, PSMC3, PSMC4, PSMC5, PSMC6, PSMD11, PSMD12, PSMD13, PSMD14, PSMD2, PSMD3, PSMD4, PSMD6, PSMD7, PSMD8, PSME1, SEM1]
R-HSA:180585	Vif-mediated degradation of APOBEC3G	REACTOME_Pathways_27.02.2019	2.16907e-22	1.79685e-21	0.011152	0.0126727	[-1]	Group75	63.6364	35	[ELOB, PSMA1, PSMA2, PSMA3, PSMA4, PSMA5, PSMA6, PSMA7, PSMB1, PSMB2, PSMB3, PSMB4, PSMB5, PSMB6, PSMB7, PSMC1, PSMC2, PSMC3, PSMC4, PSMC5, PSMC6, PSMD11, PSMD12, PSMD13, PSMD14, PSMD2, PSMD3, PSMD4, PSMD6, PSMD7, PSMD8, PSME1, RBX1, SEM1, UBC]
R-HSA:349425	Autodegradation of the E3 ubiquitin ligase COP1	REACTOME_Pathways_27.02.2019	3.97602e-21	2.86872e-20	0.011152	0.0126727	[-1]	Group75	63.4615	33	[PSMA1, PSMA2, PSMA3, PSMA4, PSMA5, PSMA6, PSMA7, PSMB1, PSMB2, PSMB3, PSMB4, PSMB5, PSMB6, PSMB7, PSMC1, PSMC2, PSMC3, PSMC4, PSMC5, PSMC6, PSMD11, PSMD12, PSMD13, PSMD14, PSMD2, PSMD3, PSMD4, PSMD6, PSMD7, PSMD8, PSME1, SEM1, UBC]
R-HSA:176814	Activation of APC/C and APC/C:Cdc20 mediated degradation of mitotic proteins	REACTOME_Pathways_27.02.2019	4.93357e-30	7.5237e-29	0.011152	0.0126727	[-1]	Group75	63.1579	48	[ANAPC1, ANAPC10, ANAPC11, ANAPC15, ANAPC4, ANAPC5, BUB1B, BUB3, CCNA2, CDC16, CDC20, CDC23, CDC26, MAD2L1, PLK1, PSMA1, PSMA2, PSMA3, PSMA4, PSMA5, PSMA6, PSMA7, PSMB1, PSMB2, PSMB3, PSMB4, PSMB5, PSMB6, PSMB7, PSMC1, PSMC2, PSMC3, PSMC4, PSMC5, PSMC6, PSMD11, PSMD12, PSMD13, PSMD14, PSMD2, PSMD3, PSMD4, PSMD6, PSMD7, PSMD8, PSME1, SEM1, UBC]
R-HSA:69239	Synthesis of DNA	REACTOME_Pathways_27.02.2019	2.85617e-46	1.27766e-44	0.011152	0.0126727	[-1]	Group75	63.0252	75	[ANAPC1, ANAPC10, ANAPC11, ANAPC15, ANAPC4, ANAPC5, CCNA2, CDC16, CDC23, CDC26, CDC45, CDC6, CDT1, CUL1, FEN1, GINS1, GINS2, GINS3, MCM2, MCM3, MCM4, MCM5, MCM6, MCM7, ORC1, ORC3, ORC4, ORC5, PCNA, POLA2, POLD1, POLD2, POLD3, POLE2, PRIM1, PSMA1, PSMA2, PSMA3, PSMA4, PSMA5, PSMA6, PSMA7, PSMB1, PSMB2, PSMB3, PSMB4, PSMB5, PSMB6, PSMB7, PSMC1, PSMC2, PSMC3, PSMC4, PSMC5, PSMC6, PSMD11, PSMD12, PSM…
R-HSA:350562	Regulation of ornithine decarboxylase (ODC)	REACTOME_Pathways_27.02.2019	2.64376e-20	1.7564e-19	0.011152	0.0126727	[-1]	Group75	62.7451	32	[PSMA1, PSMA2, PSMA3, PSMA4, PSMA5, PSMA6, PSMA7, PSMB1, PSMB2, PSMB3, PSMB4, PSMB5, PSMB6, PSMB7, PSMC1, PSMC2, PSMC3, PSMC4, PSMC5, PSMC6, PSMD11, PSMD12, PSMD13, PSMD14, PSMD2, PSMD3, PSMD4, PSMD6, PSMD7, PSMD8, PSME1, SEM1]
R-HSA:5676590	NIK-->noncanonical NF-kB signaling	REACTOME_Pathways_27.02.2019	2.87343e-23	2.57076e-22	0.011152	0.0126727	[-1]	Group75	62.7119	37	[CUL1, PSMA1, PSMA2, PSMA3, PSMA4, PSMA5, PSMA6, PSMA7, PSMB1, PSMB2, PSMB3, PSMB4, PSMB5, PSMB6, PSMB7, PSMC1, PSMC2, PSMC3, PSMC4, PSMC5, PSMC6, PSMD11, PSMD12, PSMD13, PSMD14, PSMD2, PSMD3, PSMD4, PSMD6, PSMD7, PSMD8, PSME1, SEM1, SKP1, UBA3, UBC, UBE2M]
R-HSA:176409	APC/C:Cdc20 mediated degradation of mitotic proteins	REACTOME_Pathways_27.02.2019	3.30023e-29	4.61345e-28	0.011152	0.0126727	[-1]	Group75	62.6667	47	[ANAPC1, ANAPC10, ANAPC11, ANAPC15, ANAPC4, ANAPC5, BUB1B, BUB3, CCNA2, CDC16, CDC20, CDC23, CDC26, MAD2L1, PSMA1, PSMA2, PSMA3, PSMA4, PSMA5, PSMA6, PSMA7, PSMB1, PSMB2, PSMB3, PSMB4, PSMB5, PSMB6, PSMB7, PSMC1, PSMC2, PSMC3, PSMC4, PSMC5, PSMC6, PSMD11, PSMD12, PSMD13, PSMD14, PSMD2, PSMD3, PSMD4, PSMD6, PSMD7, PSMD8, PSME1, SEM1, UBC]
R-HSA:176408	Regulation of APC/C activators between G1/S and early anaphase	REACTOME_Pathways_27.02.2019	6.4374e-31	1.13671e-29	0.011152	0.0126727	[-1]	Group75	62.5	50	[ANAPC1, ANAPC10, ANAPC11, ANAPC15, ANAPC4, ANAPC5, BUB1B, BUB3, CCNA2, CDC16, CDC20, CDC23, CDC26, CUL1, MAD2L1, PLK1, PSMA1, PSMA2, PSMA3, PSMA4, PSMA5, PSMA6, PSMA7, PSMB1, PSMB2, PSMB3, PSMB4, PSMB5, PSMB6, PSMB7, PSMC1, PSMC2, PSMC3, PSMC4, PSMC5, PSMC6, PSMD11, PSMD12, PSMD13, PSMD14, PSMD2, PSMD3, PSMD4, PSMD6, PSMD7, PSMD8, PSME1, SEM1, SKP1, UBC]
R-HSA:174178	APC/C:Cdh1 mediated degradation of Cdc20 and other APC/C:Cdh1 targeted proteins in late mitosis/early G1	REACTOME_Pathways_27.02.2019	6.08168e-28	7.41965e-27	0.011152	0.0126727	[-1]	Group75	62.5	45	[ANAPC1, ANAPC10, ANAPC11, ANAPC15, ANAPC4, ANAPC5, AURKB, CDC16, CDC20, CDC23, CDC26, PLK1, PSMA1, PSMA2, PSMA3, PSMA4, PSMA5, PSMA6, PSMA7, PSMB1, PSMB2, PSMB3, PSMB4, PSMB5, PSMB6, PSMB7, PSMC1, PSMC2, PSMC3, PSMC4, PSMC5, PSMC6, PSMD11, PSMD12, PSMD13, PSMD14, PSMD2, PSMD3, PSMD4, PSMD6, PSMD7, PSMD8, PSME1, SEM1, UBC]
R-HSA:450408	AUF1 (hnRNP D0) binds and destabilizes mRNA	REACTOME_Pathways_27.02.2019	5.24861e-22	4.24315e-21	0.011152	0.0126727	[-1]	Group75	62.5	35	[EIF4G1, PABPC1, PSMA1, PSMA2, PSMA3, PSMA4, PSMA5, PSMA6, PSMA7, PSMB1, PSMB2, PSMB3, PSMB4, PSMB5, PSMB6, PSMB7, PSMC1, PSMC2, PSMC3, PSMC4, PSMC5, PSMC6, PSMD11, PSMD12, PSMD13, PSMD14, PSMD2, PSMD3, PSMD4, PSMD6, PSMD7, PSMD8, PSME1, SEM1, UBC]
R-HSA:187577	SCF(Skp2)-mediated degradation of p27/p21	REACTOME_Pathways_27.02.2019	6.80176e-23	6.00524e-22	0.011152	0.0126727	[-1]	Group75	61.6667	37	[CCNA2, CCND1, CUL1, PSMA1, PSMA2, PSMA3, PSMA4, PSMA5, PSMA6, PSMA7, PSMB1, PSMB2, PSMB3, PSMB4, PSMB5, PSMB6, PSMB7, PSMC1, PSMC2, PSMC3, PSMC4, PSMC5, PSMC6, PSMD11, PSMD12, PSMD13, PSMD14, PSMD2, PSMD3, PSMD4, PSMD6, PSMD7, PSMD8, PSME1, SEM1, SKP1, UBC]
R-HSA:5607761	Dectin-1 mediated noncanonical NF-kB signaling	REACTOME_Pathways_27.02.2019	6.80176e-23	6.00524e-22	0.011152	0.0126727	[-1]	Group75	61.6667	37	[CUL1, PSMA1, PSMA2, PSMA3, PSMA4, PSMA5, PSMA6, PSMA7, PSMB1, PSMB2, PSMB3, PSMB4, PSMB5, PSMB6, PSMB7, PSMC1, PSMC2, PSMC3, PSMC4, PSMC5, PSMC6, PSMD11, PSMD12, PSMD13, PSMD14, PSMD2, PSMD3, PSMD4, PSMD6, PSMD7, PSMD8, PSME1, SEM1, SKP1, UBA3, UBC, UBE2M]
R-HSA:5610783	Degradation of GLI2 by the proteasome	REACTOME_Pathways_27.02.2019	6.80176e-23	6.00524e-22	0.011152	0.0126727	[-1]	Group75	61.6667	37	[CSNK1A1, CUL1, PSMA1, PSMA2, PSMA3, PSMA4, PSMA5, PSMA6, PSMA7, PSMB1, PSMB2, PSMB3, PSMB4, PSMB5, PSMB6, PSMB7, PSMC1, PSMC2, PSMC3, PSMC4, PSMC5, PSMC6, PSMD11, PSMD12, PSMD13, PSMD14, PSMD2, PSMD3, PSMD4, PSMD6, PSMD7, PSMD8, PSME1, RBX1, SEM1, SKP1, UBC]
R-HSA:5610785	GLI3 is processed to GLI3R by the proteasome	REACTOME_Pathways_27.02.2019	6.80176e-23	6.00524e-22	0.011152	0.0126727	[-1]	Group75	61.6667	37	[CSNK1A1, CUL1, PSMA1, PSMA2, PSMA3, PSMA4, PSMA5, PSMA6, PSMA7, PSMB1, PSMB2, PSMB3, PSMB4, PSMB5, PSMB6, PSMB7, PSMC1, PSMC2, PSMC3, PSMC4, PSMC5, PSMC6, PSMD11, PSMD12, PSMD13, PSMD14, PSMD2, PSMD3, PSMD4, PSMD6, PSMD7, PSMD8, PSME1, RBX1, SEM1, SKP1, UBC]
R-HSA:4641258	Degradation of DVL	REACTOME_Pathways_27.02.2019	1.23395e-21	9.19979e-21	0.011152	0.0126727	[-1]	Group75	61.4035	35	[CUL3, PSMA1, PSMA2, PSMA3, PSMA4, PSMA5, PSMA6, PSMA7, PSMB1, PSMB2, PSMB3, PSMB4, PSMB5, PSMB6, PSMB7, PSMC1, PSMC2, PSMC3, PSMC4, PSMC5, PSMC6, PSMD11, PSMD12, PSMD13, PSMD14, PSMD2, PSMD3, PSMD4, PSMD6, PSMD7, PSMD8, PSME1, RBX1, SEM1, UBC]
R-HSA:69002	DNA Replication Pre-Initiation	REACTOME_Pathways_27.02.2019	1.9358e-31	3.51061e-30	0.011152	0.0126727	[-1]	Group75	61.1765	52	[CDC45, CDC6, CDC7, CDT1, MCM2, MCM3, MCM4, MCM5, MCM6, MCM7, ORC1, ORC3, ORC4, ORC5, POLA2, POLE2, PRIM1, PSMA1, PSMA2, PSMA3, PSMA4, PSMA5, PSMA6, PSMA7, PSMB1, PSMB2, PSMB3, PSMB4, PSMB5, PSMB6, PSMB7, PSMC1, PSMC2, PSMC3, PSMC4, PSMC5, PSMC6, PSMD11, PSMD12, PSMD13, PSMD14, PSMD2, PSMD3, PSMD4, PSMD6, PSMD7, PSMD8, PSME1, RPA2, RPA3, SEM1, UBC]
R-HSA:69017	CDK-mediated phosphorylation and removal of Cdc6	REACTOME_Pathways_27.02.2019	9.37352e-27	1.03109e-25	0.011152	0.0126727	[-1]	Group75	61.1111	44	[ANAPC1, ANAPC10, ANAPC11, ANAPC15, ANAPC4, ANAPC5, CCNA2, CDC16, CDC23, CDC26, CDC6, PSMA1, PSMA2, PSMA3, PSMA4, PSMA5, PSMA6, PSMA7, PSMB1, PSMB2, PSMB3, PSMB4, PSMB5, PSMB6, PSMB7, PSMC1, PSMC2, PSMC3, PSMC4, PSMC5, PSMC6, PSMD11, PSMD12, PSMD13, PSMD14, PSMD2, PSMD3, PSMD4, PSMD6, PSMD7, PSMD8, PSME1, SEM1, UBC]
R-HSA:5362768	Hh mutants that don't undergo autocatalytic processing are degraded by ERAD	REACTOME_Pathways_27.02.2019	7.95011e-21	5.5568e-20	0.011152	0.0126727	[-1]	Group75	60.7143	34	[PSMA1, PSMA2, PSMA3, PSMA4, PSMA5, PSMA6, PSMA7, PSMB1, PSMB2, PSMB3, PSMB4, PSMB5, PSMB6, PSMB7, PSMC1, PSMC2, PSMC3, PSMC4, PSMC5, PSMC6, PSMD11, PSMD12, PSMD13, PSMD14, PSMD2, PSMD3, PSMD4, PSMD6, PSMD7, PSMD8, PSME1, SEM1, UBC, VCP]
R-HSA:5610780	Degradation of GLI1 by the proteasome	REACTOME_Pathways_27.02.2019	9.99772e-22	7.53761e-21	0.011152	0.0126727	[-1]	Group75	60	36	[CUL1, PSMA1, PSMA2, PSMA3, PSMA4, PSMA5, PSMA6, PSMA7, PSMB1, PSMB2, PSMB3, PSMB4, PSMB5, PSMB6, PSMB7, PSMC1, PSMC2, PSMC3, PSMC4, PSMC5, PSMC6, PSMD11, PSMD12, PSMD13, PSMD14, PSMD2, PSMD3, PSMD4, PSMD6, PSMD7, PSMD8, PSME1, RBX1, SEM1, SKP1, UBC]
R-HSA:4641257	Degradation of AXIN	REACTOME_Pathways_27.02.2019	5.06116e-20	3.29713e-19	0.011152	0.0126727	[-1]	Group75	60	33	[PSMA1, PSMA2, PSMA3, PSMA4, PSMA5, PSMA6, PSMA7, PSMB1, PSMB2, PSMB3, PSMB4, PSMB5, PSMB6, PSMB7, PSMC1, PSMC2, PSMC3, PSMC4, PSMC5, PSMC6, PSMD11, PSMD12, PSMD13, PSMD14, PSMD2, PSMD3, PSMD4, PSMD6, PSMD7, PSMD8, PSME1, SEM1, UBC]
R-HSA:8941858	Regulation of RUNX3 expression and activity	REACTOME_Pathways_27.02.2019	5.06116e-20	3.29713e-19	0.011152	0.0126727	[-1]	Group75	60	33	[PSMA1, PSMA2, PSMA3, PSMA4, PSMA5, PSMA6, PSMA7, PSMB1, PSMB2, PSMB3, PSMB4, PSMB5, PSMB6, PSMB7, PSMC1, PSMC2, PSMC3, PSMC4, PSMC5, PSMC6, PSMD11, PSMD12, PSMD13, PSMD14, PSMD2, PSMD3, PSMD4, PSMD6, PSMD7, PSMD8, PSME1, SEM1, UBC]
R-HSA:69306	DNA Replication	REACTOME_Pathways_27.02.2019	1.64756e-44	6.14175e-43	0.011152	0.0126727	[-1]	Group75	59.8425	76	[ANAPC1, ANAPC10, ANAPC11, ANAPC15, ANAPC4, ANAPC5, CCNA2, CDC16, CDC23, CDC26, CDC45, CDC6, CDC7, CDT1, CUL1, FEN1, GINS1, GINS2, GINS3, MCM2, MCM3, MCM4, MCM5, MCM6, MCM7, ORC1, ORC3, ORC4, ORC5, PCNA, POLA2, POLD1, POLD2, POLD3, POLE2, PRIM1, PSMA1, PSMA2, PSMA3, PSMA4, PSMA5, PSMA6, PSMA7, PSMB1, PSMB2, PSMB3, PSMB4, PSMB5, PSMB6, PSMB7, PSMC1, PSMC2, PSMC3, PSMC4, PSMC5, PSMC6, PSMD11, PSMD1…
R-HSA:176187	Activation of ATR in response to replication stress	REACTOME_Pathways_27.02.2019	1.15713e-13	4.51417e-13	0.011152	0.0126727	[-1]	Group75	59.4595	22	[CDC45, CDC6, CDC7, CHEK1, HUS1, MCM2, MCM3, MCM4, MCM5, MCM6, MCM7, ORC1, ORC3, ORC4, ORC5, RAD17, RAD9A, RFC2, RFC3, RFC5, RPA2, RPA3]
R-HSA:174143	APC/C-mediated degradation of cell cycle proteins	REACTOME_Pathways_27.02.2019	6.36591e-30	9.28593e-29	0.011152	0.0126727	[-1]	Group75	59.3023	51	[ANAPC1, ANAPC10, ANAPC11, ANAPC15, ANAPC4, ANAPC5, AURKB, BUB1B, BUB3, CCNA2, CDC16, CDC20, CDC23, CDC26, CUL1, MAD2L1, PLK1, PSMA1, PSMA2, PSMA3, PSMA4, PSMA5, PSMA6, PSMA7, PSMB1, PSMB2, PSMB3, PSMB4, PSMB5, PSMB6, PSMB7, PSMC1, PSMC2, PSMC3, PSMC4, PSMC5, PSMC6, PSMD11, PSMD12, PSMD13, PSMD14, PSMD2, PSMD3, PSMD4, PSMD6, PSMD7, PSMD8, PSME1, SEM1, SKP1, UBC]
R-HSA:453276	Regulation of mitotic cell cycle	REACTOME_Pathways_27.02.2019	6.36591e-30	9.28593e-29	0.011152	0.0126727	[-1]	Group75	59.3023	51	[ANAPC1, ANAPC10, ANAPC11, ANAPC15, ANAPC4, ANAPC5, AURKB, BUB1B, BUB3, CCNA2, CDC16, CDC20, CDC23, CDC26, CUL1, MAD2L1, PLK1, PSMA1, PSMA2, PSMA3, PSMA4, PSMA5, PSMA6, PSMA7, PSMB1, PSMB2, PSMB3, PSMB4, PSMB5, PSMB6, PSMB7, PSMC1, PSMC2, PSMC3, PSMC4, PSMC5, PSMC6, PSMD11, PSMD12, PSMD13, PSMD14, PSMD2, PSMD3, PSMD4, PSMD6, PSMD7, PSMD8, PSME1, SEM1, SKP1, UBC]
R-HSA:6791226	Major pathway of rRNA processing in the nucleolus and cytosol	REACTOME_Pathways_27.02.2019	5.34846e-62	4.48602e-60	0.011152	0.0126727	[-1]	Group75	58.2888	109	[BMS1, BOP1, BUD23, BYSL, C1D, DDX21, DDX47, DDX49, DHX37, DIS3, EBNA1BP2, EXOSC1, EXOSC10, EXOSC2, EXOSC3, EXOSC4, EXOSC5, EXOSC6, EXOSC7, EXOSC8, FTSJ3, GNL3, HEATR1, IMP4, ISG20L2, KRR1, LTV1, MPHOSPH10, MTREX, NCL, NIP7, NOB1, NOL12, NOL6, NOL9, NOP14, NOP56, NOP58, PDCD11, RBM28, RCL1, RIOK2, RPL10A, RPL12, RPL13, RPL13A, RPL14, RPL15, RPL18A, RPL19, RPL23, RPL24, RPL26, RPL27A, RPL28, RPL29…
R-HSA:69541	Stabilization of p53	REACTOME_Pathways_27.02.2019	2.40994e-19	1.52553e-18	0.011152	0.0126727	[-1]	Group75	57.8947	33	[PSMA1, PSMA2, PSMA3, PSMA4, PSMA5, PSMA6, PSMA7, PSMB1, PSMB2, PSMB3, PSMB4, PSMB5, PSMB6, PSMB7, PSMC1, PSMC2, PSMC3, PSMC4, PSMC5, PSMC6, PSMD11, PSMD12, PSMD13, PSMD14, PSMD2, PSMD3, PSMD4, PSMD6, PSMD7, PSMD8, PSME1, SEM1, UBC]
R-HSA:5387390	Hh mutants abrogate ligand secretion	REACTOME_Pathways_27.02.2019	8.396e-20	5.41704e-19	0.011152	0.0126727	[-1]	Group75	57.6271	34	[PSMA1, PSMA2, PSMA3, PSMA4, PSMA5, PSMA6, PSMA7, PSMB1, PSMB2, PSMB3, PSMB4, PSMB5, PSMB6, PSMB7, PSMC1, PSMC2, PSMC3, PSMC4, PSMC5, PSMC6, PSMD11, PSMD12, PSMD13, PSMD14, PSMD2, PSMD3, PSMD4, PSMD6, PSMD7, PSMD8, PSME1, SEM1, UBC, VCP]
R-HSA:1234176	Oxygen-dependent proline hydroxylation of Hypoxia-inducible Factor Alpha	REACTOME_Pathways_27.02.2019	5.80878e-22	4.64011e-21	0.011152	0.0126727	[-1]	Group75	57.5758	38	[EGLN2, ELOB, PSMA1, PSMA2, PSMA3, PSMA4, PSMA5, PSMA6, PSMA7, PSMB1, PSMB2, PSMB3, PSMB4, PSMB5, PSMB6, PSMB7, PSMC1, PSMC2, PSMC3, PSMC4, PSMC5, PSMC6, PSMD11, PSMD12, PSMD13, PSMD14, PSMD2, PSMD3, PSMD4, PSMD6, PSMD7, PSMD8, PSME1, RBX1, SEM1, UBC, UBE2D3, VHL]
R-HSA:68962	Activation of the pre-replicative complex	REACTOME_Pathways_27.02.2019	1.25268e-11	4.35516e-11	0.011152	0.0126727	[-1]	Group75	57.5758	19	[CDC45, CDC6, CDC7, CDT1, MCM2, MCM3, MCM4, MCM5, MCM6, MCM7, ORC1, ORC3, ORC4, ORC5, POLA2, POLE2, PRIM1, RPA2, RPA3]
R-HSA:165054	Rev-mediated nuclear export of HIV RNA	REACTOME_Pathways_27.02.2019	4.34294e-12	1.54186e-11	0.011152	0.0126727	[-1]	Group75	57.1429	20	[NDC1, NUP133, NUP153, NUP155, NUP160, NUP205, NUP214, NUP35, NUP43, NUP62, NUP85, NUP88, NUP98, RAE1, RANGAP1, RCC1, SEC13, SEH1L, TPR, XPO1]
R-HSA:177243	Interactions of Rev with host cellular proteins	REACTOME_Pathways_27.02.2019	1.50358e-12	5.63633e-12	0.011152	0.0126727	[-1]	Group75	56.7568	21	[NDC1, NPM1, NUP133, NUP153, NUP155, NUP160, NUP205, NUP214, NUP35, NUP43, NUP62, NUP85, NUP88, NUP98, RAE1, RANGAP1, RCC1, SEC13, SEH1L, TPR, XPO1]
R-HSA:179409	APC-Cdc20 mediated degradation of Nek2A	REACTOME_Pathways_27.02.2019	1.09305e-08	3.0059e-08	0.011152	0.0126727	[-1]	Group75	56	14	[ANAPC1, ANAPC10, ANAPC11, ANAPC15, ANAPC4, ANAPC5, BUB1B, BUB3, CDC16, CDC20, CDC23, CDC26, MAD2L1, UBC]
R-HSA:180746	Nuclear import of Rev protein	REACTOME_Pathways_27.02.2019	2.57987e-11	8.8774e-11	0.011152	0.0126727	[-1]	Group75	55.8824	19	[NDC1, NPM1, NUP133, NUP153, NUP155, NUP160, NUP205, NUP214, NUP35, NUP43, NUP62, NUP85, NUP88, NUP98, RAE1, RCC1, SEC13, SEH1L, TPR]
R-HSA:4085377	SUMOylation of SUMOylation proteins	REACTOME_Pathways_27.02.2019	2.57987e-11	8.8774e-11	0.011152	0.0126727	[-1]	Group75	55.8824	19	[NDC1, NUP133, NUP153, NUP155, NUP160, NUP205, NUP214, NUP35, NUP43, NUP62, NUP85, NUP88, NUP98, RAE1, SEC13, SEH1L, SUMO2, TPR, UBE2I]
R-HSA:5678895	Defective CFTR causes cystic fibrosis	REACTOME_Pathways_27.02.2019	3.60442e-19	2.23941e-18	0.011152	0.0126727	[-1]	Group75	55.7377	34	[PSMA1, PSMA2, PSMA3, PSMA4, PSMA5, PSMA6, PSMA7, PSMB1, PSMB2, PSMB3, PSMB4, PSMB5, PSMB6, PSMB7, PSMC1, PSMC2, PSMC3, PSMC4, PSMC5, PSMC6, PSMD11, PSMD12, PSMD13, PSMD14, PSMD2, PSMD3, PSMD4, PSMD6, PSMD7, PSMD8, PSME1, SEM1, UBC, VCP]
R-HSA:167172	Transcription of the HIV genome	REACTOME_Pathways_27.02.2019	1.02126e-22	8.67428e-22	0.011152	0.0126727	[-1]	Group75	55.4054	41	[CCNH, CCNK, CDK9, CTDP1, ELL, ELOB, ERCC2, ERCC3, GTF2A1, GTF2A2, GTF2B, GTF2E1, GTF2E2, GTF2F2, GTF2H1, GTF2H3, GTF2H4, MNAT1, NCBP1, NCBP2, NELFA, NELFB, NELFE, POLR2A, POLR2C, POLR2E, POLR2F, POLR2G, POLR2H, POLR2K, POLR2L, RNGTT, RNMT, SSRP1, SUPT16H, SUPT5H, TAF10, TAF5, TAF6, TAF7, TBP]
R-HSA:170822	Regulation of Glucokinase by Glucokinase Regulatory Protein	REACTOME_Pathways_27.02.2019	4.37785e-10	1.35997e-09	0.011152	0.0126727	[-1]	Group75	54.8387	17	[NDC1, NUP133, NUP153, NUP155, NUP160, NUP205, NUP214, NUP35, NUP43, NUP62, NUP85, NUP88, NUP98, RAE1, SEC13, SEH1L, TPR]
R-HSA:975956	Nonsense Mediated Decay (NMD) independent of the Exon Junction Complex (EJC)	REACTOME_Pathways_27.02.2019	3.87294e-28	4.81248e-27	0.011152	0.0126727	[-1]	Group75	54.7368	52	[EIF4G1, ETF1, GSPT1, NCBP1, NCBP2, PABPC1, RPL10A, RPL12, RPL13, RPL13A, RPL14, RPL15, RPL18A, RPL19, RPL23, RPL24, RPL26, RPL27A, RPL28, RPL29, RPL3, RPL31, RPL35, RPL36, RPL36AL, RPL37, RPL37A, RPL38, RPL4, RPL7, RPL9, RPLP0, RPLP1, RPS11, RPS12, RPS13, RPS14, RPS15A, RPS16, RPS17, RPS18, RPS19, RPS21, RPS23, RPS24, RPS25, RPS28, RPS6, RPS7, RPS8, RPSA, UPF1]
R-HSA:72613	Eukaryotic Translation Initiation	REACTOME_Pathways_27.02.2019	7.94075e-35	1.97342e-33	0.011152	0.0126727	[-1]	Group75	54.6218	65	[EIF2B1, EIF2B2, EIF2B3, EIF2B4, EIF2B5, EIF2S1, EIF2S2, EIF3A, EIF3B, EIF3D, EIF3E, EIF3F, EIF3H, EIF3I, EIF3J, EIF3M, EIF4A1, EIF4G1, EIF5, PABPC1, RPL10A, RPL12, RPL13, RPL13A, RPL14, RPL15, RPL18A, RPL19, RPL23, RPL24, RPL26, RPL27A, RPL28, RPL29, RPL3, RPL31, RPL35, RPL36, RPL36AL, RPL37, RPL37A, RPL38, RPL4, RPL7, RPL9, RPLP0, RPLP1, RPS11, RPS12, RPS13, RPS14, RPS15A, RPS16, RPS17, RPS18, …
R-HSA:72737	Cap-dependent Translation Initiation	REACTOME_Pathways_27.02.2019	7.94075e-35	1.97342e-33	0.011152	0.0126727	[-1]	Group75	54.6218	65	[EIF2B1, EIF2B2, EIF2B3, EIF2B4, EIF2B5, EIF2S1, EIF2S2, EIF3A, EIF3B, EIF3D, EIF3E, EIF3F, EIF3H, EIF3I, EIF3J, EIF3M, EIF4A1, EIF4G1, EIF5, PABPC1, RPL10A, RPL12, RPL13, RPL13A, RPL14, RPL15, RPL18A, RPL19, RPL23, RPL24, RPL26, RPL27A, RPL28, RPL29, RPL3, RPL31, RPL35, RPL36, RPL36AL, RPL37, RPL37A, RPL38, RPL4, RPL7, RPL9, RPLP0, RPLP1, RPS11, RPS12, RPS13, RPS14, RPS15A, RPS16, RPS17, RPS18, …
R-HSA:1169091	Activation of NF-kappaB in B cells	REACTOME_Pathways_27.02.2019	1.67477e-19	1.07026e-18	0.011152	0.0126727	[-1]	Group75	53.7313	36	[CUL1, NFKBIE, PSMA1, PSMA2, PSMA3, PSMA4, PSMA5, PSMA6, PSMA7, PSMB1, PSMB2, PSMB3, PSMB4, PSMB5, PSMB6, PSMB7, PSMC1, PSMC2, PSMC3, PSMC4, PSMC5, PSMC6, PSMD11, PSMD12, PSMD13, PSMD14, PSMD2, PSMD3, PSMD4, PSMD6, PSMD7, PSMD8, PSME1, SEM1, SKP1, UBC]
R-HSA:1799339	SRP-dependent cotranslational protein targeting to membrane	REACTOME_Pathways_27.02.2019	1.35831e-31	2.60407e-30	0.011152	0.0126727	[-1]	Group75	53.5714	60	[DDOST, RPL10A, RPL12, RPL13, RPL13A, RPL14, RPL15, RPL18A, RPL19, RPL23, RPL24, RPL26, RPL27A, RPL28, RPL29, RPL3, RPL31, RPL35, RPL36, RPL36AL, RPL37, RPL37A, RPL38, RPL4, RPL7, RPL9, RPLP0, RPLP1, RPN1, RPN2, RPS11, RPS12, RPS13, RPS14, RPS15A, RPS16, RPS17, RPS18, RPS19, RPS21, RPS23, RPS24, RPS25, RPS28, RPS6, RPS7, RPS8, RPSA, SEC61A1, SEC61B, SEC61G, SPCS2, SPCS3, SRP14, SRP19, SRP54, SRP7…
R-HSA:72689	Formation of a pool of free 40S subunits	REACTOME_Pathways_27.02.2019	1.73332e-28	2.28051e-27	0.011152	0.0126727	[-1]	Group75	53.4653	54	[EIF3A, EIF3B, EIF3D, EIF3E, EIF3F, EIF3H, EIF3I, EIF3J, EIF3M, RPL10A, RPL12, RPL13, RPL13A, RPL14, RPL15, RPL18A, RPL19, RPL23, RPL24, RPL26, RPL27A, RPL28, RPL29, RPL3, RPL31, RPL35, RPL36, RPL36AL, RPL37, RPL37A, RPL38, RPL4, RPL7, RPL9, RPLP0, RPLP1, RPS11, RPS12, RPS13, RPS14, RPS15A, RPS16, RPS17, RPS18, RPS19, RPS21, RPS23, RPS24, RPS25, RPS28, RPS6, RPS7, RPS8, RPSA]
R-HSA:450531	Regulation of mRNA stability by proteins that bind AU-rich elements	REACTOME_Pathways_27.02.2019	6.3703e-25	6.47648e-24	0.011152	0.0126727	[-1]	Group75	53.4091	47	[DIS3, EIF4G1, EXOSC1, EXOSC2, EXOSC3, EXOSC4, EXOSC5, EXOSC6, EXOSC7, EXOSC8, NUP214, PABPC1, PSMA1, PSMA2, PSMA3, PSMA4, PSMA5, PSMA6, PSMA7, PSMB1, PSMB2, PSMB3, PSMB4, PSMB5, PSMB6, PSMB7, PSMC1, PSMC2, PSMC3, PSMC4, PSMC5, PSMC6, PSMD11, PSMD12, PSMD13, PSMD14, PSMD2, PSMD3, PSMD4, PSMD6, PSMD7, PSMD8, PSME1, SEM1, SET, UBC, XPO1]
R-HSA:156827	L13a-mediated translational silencing of Ceruloplasmin expression	REACTOME_Pathways_27.02.2019	7.76978e-31	1.30338e-29	0.011152	0.0126727	[-1]	Group75	53.1532	59	[EIF2S1, EIF2S2, EIF3A, EIF3B, EIF3D, EIF3E, EIF3F, EIF3H, EIF3I, EIF3J, EIF3M, EIF4A1, EIF4G1, PABPC1, RPL10A, RPL12, RPL13, RPL13A, RPL14, RPL15, RPL18A, RPL19, RPL23, RPL24, RPL26, RPL27A, RPL28, RPL29, RPL3, RPL31, RPL35, RPL36, RPL36AL, RPL37, RPL37A, RPL38, RPL4, RPL7, RPL9, RPLP0, RPLP1, RPS11, RPS12, RPS13, RPS14, RPS15A, RPS16, RPS17, RPS18, RPS19, RPS21, RPS23, RPS24, RPS25, RPS28, RPS6…
R-HSA:72764	Eukaryotic Translation Termination	REACTOME_Pathways_27.02.2019	1.41666e-25	1.46243e-24	0.011152	0.0126727	[-1]	Group75	52.6882	49	[ETF1, GSPT1, N6AMT1, RPL10A, RPL12, RPL13, RPL13A, RPL14, RPL15, RPL18A, RPL19, RPL23, RPL24, RPL26, RPL27A, RPL28, RPL29, RPL3, RPL31, RPL35, RPL36, RPL36AL, RPL37, RPL37A, RPL38, RPL4, RPL7, RPL9, RPLP0, RPLP1, RPS11, RPS12, RPS13, RPS14, RPS15A, RPS16, RPS17, RPS18, RPS19, RPS21, RPS23, RPS24, RPS25, RPS28, RPS6, RPS7, RPS8, RPSA, TRMT112]
R-HSA:72706	GTP hydrolysis and joining of the 60S ribosomal subunit	REACTOME_Pathways_27.02.2019	1.49071e-30	2.38158e-29	0.011152	0.0126727	[-1]	Group75	52.6786	59	[EIF2S1, EIF2S2, EIF3A, EIF3B, EIF3D, EIF3E, EIF3F, EIF3H, EIF3I, EIF3J, EIF3M, EIF4A1, EIF4G1, EIF5, RPL10A, RPL12, RPL13, RPL13A, RPL14, RPL15, RPL18A, RPL19, RPL23, RPL24, RPL26, RPL27A, RPL28, RPL29, RPL3, RPL31, RPL35, RPL36, RPL36AL, RPL37, RPL37A, RPL38, RPL4, RPL7, RPL9, RPLP0, RPLP1, RPS11, RPS12, RPS13, RPS14, RPS15A, RPS16, RPS17, RPS18, RPS19, RPS21, RPS23, RPS24, RPS25, RPS28, RPS6, …
R-HSA:5358346	Hedgehog ligand biogenesis	REACTOME_Pathways_27.02.2019	5.25856e-18	3.06825e-17	0.011152	0.0126727	[-1]	Group75	52.3077	34	[PSMA1, PSMA2, PSMA3, PSMA4, PSMA5, PSMA6, PSMA7, PSMB1, PSMB2, PSMB3, PSMB4, PSMB5, PSMB6, PSMB7, PSMC1, PSMC2, PSMC3, PSMC4, PSMC5, PSMC6, PSMD11, PSMD12, PSMD13, PSMD14, PSMD2, PSMD3, PSMD4, PSMD6, PSMD7, PSMD8, PSME1, SEM1, UBC, VCP]
R-HSA:927802	Nonsense-Mediated Decay (NMD)	REACTOME_Pathways_27.02.2019	9.5682e-31	1.56592e-29	0.011152	0.0126727	[-1]	Group75	52.1739	60	[EIF4A3, EIF4G1, ETF1, GSPT1, NCBP1, NCBP2, PABPC1, PPP2CA, PPP2R1A, RBM8A, RPL10A, RPL12, RPL13, RPL13A, RPL14, RPL15, RPL18A, RPL19, RPL23, RPL24, RPL26, RPL27A, RPL28, RPL29, RPL3, RPL31, RPL35, RPL36, RPL36AL, RPL37, RPL37A, RPL38, RPL4, RPL7, RPL9, RPLP0, RPLP1, RPS11, RPS12, RPS13, RPS14, RPS15A, RPS16, RPS17, RPS18, RPS19, RPS21, RPS23, RPS24, RPS25, RPS28, RPS6, RPS7, RPS8, RPSA, SMG1, SM…
R-HSA:975957	Nonsense Mediated Decay (NMD) enhanced by the Exon Junction Complex (EJC)	REACTOME_Pathways_27.02.2019	9.5682e-31	1.56592e-29	0.011152	0.0126727	[-1]	Group75	52.1739	60	[EIF4A3, EIF4G1, ETF1, GSPT1, NCBP1, NCBP2, PABPC1, PPP2CA, PPP2R1A, RBM8A, RPL10A, RPL12, RPL13, RPL13A, RPL14, RPL15, RPL18A, RPL19, RPL23, RPL24, RPL26, RPL27A, RPL28, RPL29, RPL3, RPL31, RPL35, RPL36, RPL36AL, RPL37, RPL37A, RPL38, RPL4, RPL7, RPL9, RPLP0, RPLP1, RPS11, RPS12, RPS13, RPS14, RPS15A, RPS16, RPS17, RPS18, RPS19, RPS21, RPS23, RPS24, RPS25, RPS28, RPS6, RPS7, RPS8, RPSA, SMG1, SM…
R-HSA:9010553	Regulation of expression of SLITs and ROBOs	REACTOME_Pathways_27.02.2019	4.48449e-45	1.88068e-43	0.011152	0.0126727	[-1]	Group75	52.0468	89	[EIF4A3, EIF4G1, ELOB, ETF1, GSPT1, NCBP1, NCBP2, PABPC1, PSMA1, PSMA2, PSMA3, PSMA4, PSMA5, PSMA6, PSMA7, PSMB1, PSMB2, PSMB3, PSMB4, PSMB5, PSMB6, PSMB7, PSMC1, PSMC2, PSMC3, PSMC4, PSMC5, PSMC6, PSMD11, PSMD12, PSMD13, PSMD14, PSMD2, PSMD3, PSMD4, PSMD6, PSMD7, PSMD8, PSME1, RBM8A, RBX1, RPL10A, RPL12, RPL13, RPL13A, RPL14, RPL15, RPL18A, RPL19, RPL23, RPL24, RPL26, RPL27A, RPL28, RPL29, RPL3,…
R-HSA:156902	Peptide chain elongation	REACTOME_Pathways_27.02.2019	1.2855e-23	1.16564e-22	0.011152	0.0126727	[-1]	Group75	51.6854	46	[EEF2, RPL10A, RPL12, RPL13, RPL13A, RPL14, RPL15, RPL18A, RPL19, RPL23, RPL24, RPL26, RPL27A, RPL28, RPL29, RPL3, RPL31, RPL35, RPL36, RPL36AL, RPL37, RPL37A, RPL38, RPL4, RPL7, RPL9, RPLP0, RPLP1, RPS11, RPS12, RPS13, RPS14, RPS15A, RPS16, RPS17, RPS18, RPS19, RPS21, RPS23, RPS24, RPS25, RPS28, RPS6, RPS7, RPS8, RPSA]
R-HSA:156842	Eukaryotic Translation Elongation	REACTOME_Pathways_27.02.2019	1.48306e-24	1.46344e-23	0.011152	0.0126727	[-1]	Group75	51.6129	48	[EEF1B2, EEF1G, EEF2, RPL10A, RPL12, RPL13, RPL13A, RPL14, RPL15, RPL18A, RPL19, RPL23, RPL24, RPL26, RPL27A, RPL28, RPL29, RPL3, RPL31, RPL35, RPL36, RPL36AL, RPL37, RPL37A, RPL38, RPL4, RPL7, RPL9, RPLP0, RPLP1, RPS11, RPS12, RPS13, RPS14, RPS15A, RPS16, RPS17, RPS18, RPS19, RPS21, RPS23, RPS24, RPS25, RPS28, RPS6, RPS7, RPS8, RPSA]
R-HSA:2408557	Selenocysteine synthesis	REACTOME_Pathways_27.02.2019	1.48306e-24	1.46344e-23	0.011152	0.0126727	[-1]	Group75	51.6129	48	[PSTK, RPL10A, RPL12, RPL13, RPL13A, RPL14, RPL15, RPL18A, RPL19, RPL23, RPL24, RPL26, RPL27A, RPL28, RPL29, RPL3, RPL31, RPL35, RPL36, RPL36AL, RPL37, RPL37A, RPL38, RPL4, RPL7, RPL9, RPLP0, RPLP1, RPS11, RPS12, RPS13, RPS14, RPS15A, RPS16, RPS17, RPS18, RPS19, RPS21, RPS23, RPS24, RPS25, RPS28, RPS6, RPS7, RPS8, RPSA, SARS, SEPHS2]
R-HSA:4608870	Asymmetric localization of PCP proteins	REACTOME_Pathways_27.02.2019	2.8847e-17	1.52412e-16	0.011152	0.0126727	[-1]	Group75	51.5625	33	[PSMA1, PSMA2, PSMA3, PSMA4, PSMA5, PSMA6, PSMA7, PSMB1, PSMB2, PSMB3, PSMB4, PSMB5, PSMB6, PSMB7, PSMC1, PSMC2, PSMC3, PSMC4, PSMC5, PSMC6, PSMD11, PSMD12, PSMD13, PSMD14, PSMD2, PSMD3, PSMD4, PSMD6, PSMD7, PSMD8, PSME1, SEM1, UBC]
R-HSA:69242	S Phase	REACTOME_Pathways_27.02.2019	1.17312e-41	4.14296e-40	0.011152	0.0126727	[-1]	Group75	51.5528	83	[ANAPC1, ANAPC10, ANAPC11, ANAPC15, ANAPC4, ANAPC5, CCNA2, CCND1, CCNH, CDC16, CDC23, CDC26, CDC45, CDC6, CDT1, CUL1, FEN1, GINS1, GINS2, GINS3, MCM2, MCM3, MCM4, MCM5, MCM6, MCM7, MNAT1, MYC, ORC1, ORC3, ORC4, ORC5, PCNA, POLA2, POLD1, POLD2, POLD3, POLE2, PRIM1, PSMA1, PSMA2, PSMA3, PSMA4, PSMA5, PSMA6, PSMA7, PSMB1, PSMB2, PSMB3, PSMB4, PSMB5, PSMB6, PSMB7, PSMC1, PSMC2, PSMC3, PSMC4, PSMC5, P…
R-HSA:69563	p53-Dependent G1 DNA Damage Response	REACTOME_Pathways_27.02.2019	9.84178e-18	5.45772e-17	0.011152	0.0126727	[-1]	Group75	51.5152	34	[CCNA2, PSMA1, PSMA2, PSMA3, PSMA4, PSMA5, PSMA6, PSMA7, PSMB1, PSMB2, PSMB3, PSMB4, PSMB5, PSMB6, PSMB7, PSMC1, PSMC2, PSMC3, PSMC4, PSMC5, PSMC6, PSMD11, PSMD12, PSMD13, PSMD14, PSMD2, PSMD3, PSMD4, PSMD6, PSMD7, PSMD8, PSME1, SEM1, UBC]
R-HSA:69580	p53-Dependent G1/S DNA damage checkpoint	REACTOME_Pathways_27.02.2019	9.84178e-18	5.45772e-17	0.011152	0.0126727	[-1]	Group75	51.5152	34	[CCNA2, PSMA1, PSMA2, PSMA3, PSMA4, PSMA5, PSMA6, PSMA7, PSMB1, PSMB2, PSMB3, PSMB4, PSMB5, PSMB6, PSMB7, PSMC1, PSMC2, PSMC3, PSMC4, PSMC5, PSMC6, PSMD11, PSMD12, PSMD13, PSMD14, PSMD2, PSMD3, PSMD4, PSMD6, PSMD7, PSMD8, PSME1, SEM1, UBC]
R-HSA:5658442	Regulation of RAS by GAPs	REACTOME_Pathways_27.02.2019	3.35686e-18	1.99332e-17	0.011152	0.0126727	[-1]	Group75	51.4706	35	[CUL3, PSMA1, PSMA2, PSMA3, PSMA4, PSMA5, PSMA6, PSMA7, PSMB1, PSMB2, PSMB3, PSMB4, PSMB5, PSMB6, PSMB7, PSMC1, PSMC2, PSMC3, PSMC4, PSMC5, PSMC6, PSMD11, PSMD12, PSMD13, PSMD14, PSMD2, PSMD3, PSMD4, PSMD6, PSMD7, PSMD8, PSME1, RBX1, SEM1, UBC]
R-HSA:69615	G1/S DNA Damage Checkpoints	REACTOME_Pathways_27.02.2019	3.35686e-18	1.99332e-17	0.011152	0.0126727	[-1]	Group75	51.4706	35	[CCNA2, CHEK1, PSMA1, PSMA2, PSMA3, PSMA4, PSMA5, PSMA6, PSMA7, PSMB1, PSMB2, PSMB3, PSMB4, PSMB5, PSMB6, PSMB7, PSMC1, PSMC2, PSMC3, PSMC4, PSMC5, PSMC6, PSMD11, PSMD12, PSMD13, PSMD14, PSMD2, PSMD3, PSMD4, PSMD6, PSMD7, PSMD8, PSME1, SEM1, UBC]
R-HSA:180910	Vpr-mediated nuclear import of PICs	REACTOME_Pathways_27.02.2019	1.84288e-10	5.86054e-10	0.011152	0.0126727	[-1]	Group75	51.3514	19	[BANF1, HMGA1, NDC1, NUP133, NUP153, NUP155, NUP160, NUP205, NUP214, NUP35, NUP43, NUP62, NUP85, NUP88, NUP98, RAE1, SEC13, SEH1L, TPR]
R-HSA:8948751	Regulation of PTEN stability and activity	REACTOME_Pathways_27.02.2019	6.18173e-18	3.54525e-17	0.011152	0.0126727	[-1]	Group75	50.7246	35	[CSNK2B, MKRN1, PSMA1, PSMA2, PSMA3, PSMA4, PSMA5, PSMA6, PSMA7, PSMB1, PSMB2, PSMB3, PSMB4, PSMB5, PSMB6, PSMB7, PSMC1, PSMC2, PSMC3, PSMC4, PSMC5, PSMC6, PSMD11, PSMD12, PSMD13, PSMD14, PSMD2, PSMD3, PSMD4, PSMD6, PSMD7, PSMD8, PSME1, SEM1, UBC]
R-HSA:8939902	Regulation of RUNX2 expression and activity	REACTOME_Pathways_27.02.2019	7.17949e-19	4.37949e-18	0.011152	0.0126727	[-1]	Group75	50.6849	37	[CUL1, PPARGC1B, PSMA1, PSMA2, PSMA3, PSMA4, PSMA5, PSMA6, PSMA7, PSMB1, PSMB2, PSMB3, PSMB4, PSMB5, PSMB6, PSMB7, PSMC1, PSMC2, PSMC3, PSMC4, PSMC5, PSMC6, PSMD11, PSMD12, PSMD13, PSMD14, PSMD2, PSMD3, PSMD4, PSMD6, PSMD7, PSMD8, PSME1, RBX1, SEM1, SKP1, UBC]
R-HSA:1234174	Regulation of Hypoxia-inducible Factor (HIF) by oxygen	REACTOME_Pathways_27.02.2019	2.44567e-19	1.53369e-18	0.011152	0.0126727	[-1]	Group75	50.6667	38	[EGLN2, ELOB, PSMA1, PSMA2, PSMA3, PSMA4, PSMA5, PSMA6, PSMA7, PSMB1, PSMB2, PSMB3, PSMB4, PSMB5, PSMB6, PSMB7, PSMC1, PSMC2, PSMC3, PSMC4, PSMC5, PSMC6, PSMD11, PSMD12, PSMD13, PSMD14, PSMD2, PSMD3, PSMD4, PSMD6, PSMD7, PSMD8, PSME1, RBX1, SEM1, UBC, UBE2D3, VHL]
R-HSA:2262749	Cellular response to hypoxia	REACTOME_Pathways_27.02.2019	2.44567e-19	1.53369e-18	0.011152	0.0126727	[-1]	Group75	50.6667	38	[EGLN2, ELOB, PSMA1, PSMA2, PSMA3, PSMA4, PSMA5, PSMA6, PSMA7, PSMB1, PSMB2, PSMB3, PSMB4, PSMB5, PSMB6, PSMB7, PSMC1, PSMC2, PSMC3, PSMC4, PSMC5, PSMC6, PSMD11, PSMD12, PSMD13, PSMD14, PSMD2, PSMD3, PSMD4, PSMD6, PSMD7, PSMD8, PSME1, RBX1, SEM1, UBC, UBE2D3, VHL]
R-HSA:69202	Cyclin E associated events during G1/S transition	REACTOME_Pathways_27.02.2019	3.28234e-21	2.39397e-20	0.011152	0.0126727	[-1]	Group75	50.6024	42	[CCNA2, CCND1, CCNH, CUL1, MNAT1, MYC, PSMA1, PSMA2, PSMA3, PSMA4, PSMA5, PSMA6, PSMA7, PSMB1, PSMB2, PSMB3, PSMB4, PSMB5, PSMB6, PSMB7, PSMC1, PSMC2, PSMC3, PSMC4, PSMC5, PSMC6, PSMD11, PSMD12, PSMD13, PSMD14, PSMD2, PSMD3, PSMD4, PSMD6, PSMD7, PSMD8, PSME1, RBBP4, SEM1, SKP1, UBC, WEE1]
R-HSA:674695	RNA Polymerase II Pre-transcription Events	REACTOME_Pathways_27.02.2019	5.95688e-21	4.2522e-20	0.011152	0.0126727	[-1]	Group75	50	42	[CCNH, CCNK, CDC73, CDK9, CTDP1, CTR9, ELL, ELOB, ERCC2, ERCC3, GTF2A1, GTF2A2, GTF2B, GTF2E1, GTF2E2, GTF2F2, GTF2H1, GTF2H3, GTF2H4, MNAT1, NCBP1, NCBP2, NELFA, NELFB, NELFE, POLR2A, POLR2C, POLR2E, POLR2F, POLR2G, POLR2H, POLR2K, POLR2L, RTF1, SSRP1, SUPT16H, SUPT5H, TAF10, TAF5, TAF6, TAF7, TBP]
R-HSA:3232142	SUMOylation of ubiquitinylation proteins	REACTOME_Pathways_27.02.2019	3.34916e-10	1.05013e-09	0.011152	0.0126727	[-1]	Group75	50	19	[NDC1, NUP133, NUP153, NUP155, NUP160, NUP205, NUP214, NUP35, NUP43, NUP62, NUP85, NUP88, NUP98, RAE1, SEC13, SEH1L, TPR, UBE2I, VHL]
R-HSA:168273	Influenza Viral RNA Transcription and Replication	REACTOME_Pathways_27.02.2019	7.75417e-35	2.00117e-33	0.011152	0.0126727	[-1]	Group75	49.6552	72	[GRSF1, GTF2F2, NDC1, NUP133, NUP153, NUP155, NUP160, NUP205, NUP214, NUP35, NUP43, NUP62, NUP85, NUP88, NUP98, POLR2A, POLR2C, POLR2E, POLR2F, POLR2G, POLR2H, POLR2K, POLR2L, RAE1, RPL10A, RPL12, RPL13, RPL13A, RPL14, RPL15, RPL18A, RPL19, RPL23, RPL24, RPL26, RPL27A, RPL28, RPL29, RPL3, RPL31, RPL35, RPL36, RPL36AL, RPL37, RPL37A, RPL38, RPL4, RPL7, RPL9, RPLP0, RPLP1, RPS11, RPS12, RPS13, RPS1…
R-HSA:69206	G1/S Transition	REACTOME_Pathways_27.02.2019	1.61058e-31	3.00194e-30	0.011152	0.0126727	[-1]	Group75	49.6183	65	[CCNA2, CCND1, CCNH, CDC45, CDC6, CDC7, CDT1, CUL1, MCM2, MCM3, MCM4, MCM5, MCM6, MCM7, MNAT1, MYC, ORC1, ORC3, ORC4, ORC5, PCNA, POLA2, POLE2, PPP2CA, PPP2R1A, PRIM1, PSMA1, PSMA2, PSMA3, PSMA4, PSMA5, PSMA6, PSMA7, PSMB1, PSMB2, PSMB3, PSMB4, PSMB5, PSMB6, PSMB7, PSMC1, PSMC2, PSMC3, PSMC4, PSMC5, PSMC6, PSMD11, PSMD12, PSMD13, PSMD14, PSMD2, PSMD3, PSMD4, PSMD6, PSMD7, PSMD8, PSME1, RBBP4, RPA…
R-HSA:69656	Cyclin A:Cdk2-associated events at S phase entry	REACTOME_Pathways_27.02.2019	1.0685e-20	7.31596e-20	0.011152	0.0126727	[-1]	Group75	49.4118	42	[CCNA2, CCND1, CCNH, CUL1, MNAT1, MYC, PSMA1, PSMA2, PSMA3, PSMA4, PSMA5, PSMA6, PSMA7, PSMB1, PSMB2, PSMB3, PSMB4, PSMB5, PSMB6, PSMB7, PSMC1, PSMC2, PSMC3, PSMC4, PSMC5, PSMC6, PSMD11, PSMD12, PSMD13, PSMD14, PSMD2, PSMD3, PSMD4, PSMD6, PSMD7, PSMD8, PSME1, RBBP4, SEM1, SKP1, UBC, WEE1]
R-HSA:168333	NEP/NS2 Interacts with the Cellular Export Machinery	REACTOME_Pathways_27.02.2019	1.74196e-09	5.14915e-09	0.011152	0.0126727	[-1]	Group75	48.6486	18	[NDC1, NUP133, NUP153, NUP155, NUP160, NUP205, NUP214, NUP35, NUP43, NUP62, NUP85, NUP88, NUP98, RAE1, SEC13, SEH1L, TPR, XPO1]
R-HSA:168271	Transport of Ribonucleoproteins into the Host Nucleus	REACTOME_Pathways_27.02.2019	5.11681e-09	1.44868e-08	0.011152	0.0126727	[-1]	Group75	48.5714	17	[NDC1, NUP133, NUP153, NUP155, NUP160, NUP205, NUP214, NUP35, NUP43, NUP62, NUP85, NUP88, NUP98, RAE1, SEC13, SEH1L, TPR]
R-HSA:3301854	Nuclear Pore Complex (NPC) Disassembly	REACTOME_Pathways_27.02.2019	5.11681e-09	1.44868e-08	0.011152	0.0126727	[-1]	Group75	48.5714	17	[NDC1, NUP133, NUP153, NUP155, NUP160, NUP205, NUP214, NUP35, NUP43, NUP62, NUP85, NUP88, NUP98, RAE1, SEC13, SEH1L, TPR]
R-HSA:168255	Influenza Life Cycle	REACTOME_Pathways_27.02.2019	2.63246e-34	6.30851e-33	0.011152	0.0126727	[-1]	Group75	47.7419	74	[CLTC, GRSF1, GTF2F2, NDC1, NUP133, NUP153, NUP155, NUP160, NUP205, NUP214, NUP35, NUP43, NUP62, NUP85, NUP88, NUP98, POLR2A, POLR2C, POLR2E, POLR2F, POLR2G, POLR2H, POLR2K, POLR2L, RAE1, RPL10A, RPL12, RPL13, RPL13A, RPL14, RPL15, RPL18A, RPL19, RPL23, RPL24, RPL26, RPL27A, RPL28, RPL29, RPL3, RPL31, RPL35, RPL36, RPL36AL, RPL37, RPL37A, RPL38, RPL4, RPL7, RPL9, RPLP0, RPLP1, RPS11, RPS12, RPS13…
R-HSA:195253	Degradation of beta-catenin by the destruction complex	REACTOME_Pathways_27.02.2019	1.45222e-18	8.77871e-18	0.011152	0.0126727	[-1]	Group75	47.561	39	[CSNK1A1, CUL1, PPP2CA, PPP2R1A, PSMA1, PSMA2, PSMA3, PSMA4, PSMA5, PSMA6, PSMA7, PSMB1, PSMB2, PSMB3, PSMB4, PSMB5, PSMB6, PSMB7, PSMC1, PSMC2, PSMC3, PSMC4, PSMC5, PSMC6, PSMD11, PSMD12, PSMD13, PSMD14, PSMD2, PSMD3, PSMD4, PSMD6, PSMD7, PSMD8, PSME1, RBX1, SEM1, SKP1, UBC]
R-HSA:176033	Interactions of Vpr with host cellular proteins	REACTOME_Pathways_27.02.2019	1.0272e-09	3.13297e-09	0.011152	0.0126727	[-1]	Group75	47.5	19	[BANF1, HMGA1, NDC1, NUP133, NUP153, NUP155, NUP160, NUP205, NUP214, NUP35, NUP43, NUP62, NUP85, NUP88, NUP98, RAE1, SEC13, SEH1L, TPR]
R-HSA:162599	Late Phase of HIV Life Cycle	REACTOME_Pathways_27.02.2019	1.05656e-31	2.08516e-30	0.011152	0.0126727	[-1]	Group75	47.2603	69	[CCNH, CCNK, CDK9, CHMP2A, CHMP5, CHMP6, CHMP7, CTDP1, ELL, ELOB, ERCC2, ERCC3, GTF2A1, GTF2A2, GTF2B, GTF2E1, GTF2E2, GTF2F2, GTF2H1, GTF2H3, GTF2H4, MNAT1, NCBP1, NCBP2, NDC1, NELFA, NELFB, NELFE, NUP133, NUP153, NUP155, NUP160, NUP205, NUP214, NUP35, NUP43, NUP62, NUP85, NUP88, NUP98, POLR2A, POLR2C, POLR2E, POLR2F, POLR2G, POLR2H, POLR2K, POLR2L, PPIA, RAE1, RANGAP1, RCC1, RNGTT, RNMT, SEC13,…
KEGG:03010	Ribosome	KEGG_27.02.2019	6.91358e-33	1.40576e-31	0.011152	0.0126727	[-1]	Group75	47.0588	72	[FAU, MRPL10, MRPL12, MRPL13, MRPL14, MRPL16, MRPL17, MRPL18, MRPL21, MRPL27, MRPL28, MRPL3, MRPL34, MRPL4, MRPL9, MRPS10, MRPS12, MRPS14, MRPS16, MRPS18A, MRPS2, MRPS21, MRPS5, MRPS6, MRPS7, MRPS9, RPL10A, RPL12, RPL13, RPL13A, RPL14, RPL15, RPL18A, RPL19, RPL23, RPL24, RPL26, RPL27A, RPL28, RPL29, RPL3, RPL31, RPL35, RPL36, RPL36AL, RPL37, RPL37A, RPL38, RPL4, RPL7, RPL9, RPLP0, RPLP1, RPS11, R…
R-HSA:8852276	The role of GTSE1 in G2/M progression after G2 checkpoint	REACTOME_Pathways_27.02.2019	6.20201e-17	3.20119e-16	0.011152	0.0126727	[-1]	Group75	46.7532	36	[PLK1, PSMA1, PSMA2, PSMA3, PSMA4, PSMA5, PSMA6, PSMA7, PSMB1, PSMB2, PSMB3, PSMB4, PSMB5, PSMB6, PSMB7, PSMC1, PSMC2, PSMC3, PSMC4, PSMC5, PSMC6, PSMD11, PSMD12, PSMD13, PSMD14, PSMD2, PSMD3, PSMD4, PSMD6, PSMD7, PSMD8, PSME1, SEM1, TUBA1C, TUBB8, UBC]
R-HSA:162587	HIV Life Cycle	REACTOME_Pathways_27.02.2019	2.27074e-33	4.76145e-32	0.011152	0.0126727	[-1]	Group75	46.5409	74	[BANF1, CCNH, CCNK, CDK9, CHMP2A, CHMP5, CHMP6, CHMP7, CTDP1, ELL, ELOB, ERCC2, ERCC3, FEN1, GTF2A1, GTF2A2, GTF2B, GTF2E1, GTF2E2, GTF2F2, GTF2H1, GTF2H3, GTF2H4, HMGA1, MNAT1, NCBP1, NCBP2, NDC1, NELFA, NELFB, NELFE, NUP133, NUP153, NUP155, NUP160, NUP205, NUP214, NUP35, NUP43, NUP62, NUP85, NUP88, NUP98, POLR2A, POLR2C, POLR2E, POLR2F, POLR2G, POLR2H, POLR2K, POLR2L, PPIA, RAE1, RANGAP1, RCC1,…
R-HSA:168276	NS1 Mediated Effects on Host Pathways	REACTOME_Pathways_27.02.2019	1.73962e-09	5.16498e-09	0.011152	0.0126727	[-1]	Group75	46.3415	19	[CPSF4, NDC1, NUP133, NUP153, NUP155, NUP160, NUP205, NUP214, NUP35, NUP43, NUP62, NUP85, NUP88, NUP98, PABPN1, RAE1, SEC13, SEH1L, TPR]
R-HSA:2467813	Separation of Sister Chromatids	REACTOME_Pathways_27.02.2019	2.5062e-39	8.40831e-38	0.011152	0.0126727	[-1]	Group75	46.3158	88	[AHCTF1, ANAPC1, ANAPC10, ANAPC11, ANAPC15, ANAPC4, ANAPC5, AURKB, BIRC5, BUB1B, BUB3, CDC16, CDC20, CDC23, CDC26, CDCA8, CENPA, CENPE, CENPK, CKAP5, DSN1, DYNC1H1, DYNC1I2, ESPL1, INCENP, KIF18A, KNL1, MAD2L1, MIS12, NSL1, NUDC, NUF2, NUP133, NUP160, NUP43, NUP85, NUP98, PAFAH1B1, PLK1, PMF1, PPP2CA, PPP2R1A, PSMA1, PSMA2, PSMA3, PSMA4, PSMA5, PSMA6, PSMA7, PSMB1, PSMB2, PSMB3, PSMB4, PSMB5, PSM…
R-HSA:168274	Export of Viral Ribonucleoproteins from Nucleus	REACTOME_Pathways_27.02.2019	5.07818e-09	1.44384e-08	0.011152	0.0126727	[-1]	Group75	46.1538	18	[NDC1, NUP133, NUP153, NUP155, NUP160, NUP205, NUP214, NUP35, NUP43, NUP62, NUP85, NUP88, NUP98, RAE1, SEC13, SEH1L, TPR, XPO1]
R-HSA:192823	Viral mRNA Translation	REACTOME_Pathways_27.02.2019	6.53688e-21	4.6171e-20	0.011152	0.0126727	[-1]	Group75	46	46	[GRSF1, RPL10A, RPL12, RPL13, RPL13A, RPL14, RPL15, RPL18A, RPL19, RPL23, RPL24, RPL26, RPL27A, RPL28, RPL29, RPL3, RPL31, RPL35, RPL36, RPL36AL, RPL37, RPL37A, RPL38, RPL4, RPL7, RPL9, RPLP0, RPLP1, RPS11, RPS12, RPS13, RPS14, RPS15A, RPS16, RPS17, RPS18, RPS19, RPS21, RPS23, RPS24, RPS25, RPS28, RPS6, RPS7, RPS8, RPSA]
R-HSA:162909	Host Interactions of HIV factors	REACTOME_Pathways_27.02.2019	1.01813e-27	1.17787e-26	0.011152	0.0126727	[-1]	Group75	45.9259	62	[ATP6V1H, BANF1, CDK9, ELOB, HMGA1, NDC1, NPM1, NUP133, NUP153, NUP155, NUP160, NUP205, NUP214, NUP35, NUP43, NUP62, NUP85, NUP88, NUP98, PPIA, PSMA1, PSMA2, PSMA3, PSMA4, PSMA5, PSMA6, PSMA7, PSMB1, PSMB2, PSMB3, PSMB4, PSMB5, PSMB6, PSMB7, PSMC1, PSMC2, PSMC3, PSMC4, PSMC5, PSMC6, PSMD11, PSMD12, PSMD13, PSMD14, PSMD2, PSMD3, PSMD4, PSMD6, PSMD7, PSMD8, PSME1, RAE1, RANGAP1, RBX1, RCC1, SEC13, …
R-HSA:162906	HIV Infection	REACTOME_Pathways_27.02.2019	1.67472e-48	8.64413e-47	0.011152	0.0126727	[-1]	Group75	45.8333	110	[ATP6V1H, BANF1, CCNH, CCNK, CDK9, CHMP2A, CHMP5, CHMP6, CHMP7, CTDP1, ELL, ELOB, ERCC2, ERCC3, FEN1, GTF2A1, GTF2A2, GTF2B, GTF2E1, GTF2E2, GTF2F2, GTF2H1, GTF2H3, GTF2H4, HMGA1, MNAT1, NCBP1, NCBP2, NDC1, NELFA, NELFB, NELFE, NPM1, NUP133, NUP153, NUP155, NUP160, NUP205, NUP214, NUP35, NUP43, NUP62, NUP85, NUP88, NUP98, POLR2A, POLR2C, POLR2E, POLR2F, POLR2G, POLR2H, POLR2K, POLR2L, PPIA, PSMA1…
R-HSA:168254	Influenza Infection	REACTOME_Pathways_27.02.2019	1.2283e-33	2.74731e-32	0.011152	0.0126727	[-1]	Group75	45.7831	76	[CLTC, CPSF4, GRSF1, GTF2F2, NDC1, NUP133, NUP153, NUP155, NUP160, NUP205, NUP214, NUP35, NUP43, NUP62, NUP85, NUP88, NUP98, PABPN1, POLR2A, POLR2C, POLR2E, POLR2F, POLR2G, POLR2H, POLR2K, POLR2L, RAE1, RPL10A, RPL12, RPL13, RPL13A, RPL14, RPL15, RPL18A, RPL19, RPL23, RPL24, RPL26, RPL27A, RPL28, RPL29, RPL3, RPL31, RPL35, RPL36, RPL36AL, RPL37, RPL37A, RPL38, RPL4, RPL7, RPL9, RPLP0, RPLP1, RPS1…
R-HSA:2408522	Selenoamino acid metabolism	REACTOME_Pathways_27.02.2019	3.38383e-24	3.24364e-23	0.011152	0.0126727	[-1]	Group75	45.7627	54	[DARS, IARS, KARS, LARS, MARS, PSTK, QARS, RPL10A, RPL12, RPL13, RPL13A, RPL14, RPL15, RPL18A, RPL19, RPL23, RPL24, RPL26, RPL27A, RPL28, RPL29, RPL3, RPL31, RPL35, RPL36, RPL36AL, RPL37, RPL37A, RPL38, RPL4, RPL7, RPL9, RPLP0, RPLP1, RPS11, RPS12, RPS13, RPS14, RPS15A, RPS16, RPS17, RPS18, RPS19, RPS21, RPS23, RPS24, RPS25, RPS28, RPS6, RPS7, RPS8, RPSA, SARS, SEPHS2]
R-HSA:2871837	FCERI mediated NF-kB activation	REACTOME_Pathways_27.02.2019	9.90181e-17	4.99557e-16	0.011152	0.0126727	[-1]	Group75	45.122	37	[CUL1, PDPK1, PSMA1, PSMA2, PSMA3, PSMA4, PSMA5, PSMA6, PSMA7, PSMB1, PSMB2, PSMB3, PSMB4, PSMB5, PSMB6, PSMB7, PSMC1, PSMC2, PSMC3, PSMC4, PSMC5, PSMC6, PSMD11, PSMD12, PSMD13, PSMD14, PSMD2, PSMD3, PSMD4, PSMD6, PSMD7, PSMD8, PSME1, SEM1, SKP1, UBC, UBE2N]
R-HSA:9013694	Signaling by NOTCH4	REACTOME_Pathways_27.02.2019	9.90181e-17	4.99557e-16	0.011152	0.0126727	[-1]	Group75	45.122	37	[CUL1, PSMA1, PSMA2, PSMA3, PSMA4, PSMA5, PSMA6, PSMA7, PSMB1, PSMB2, PSMB3, PSMB4, PSMB5, PSMB6, PSMB7, PSMC1, PSMC2, PSMC3, PSMC4, PSMC5, PSMC6, PSMD11, PSMD12, PSMD13, PSMD14, PSMD2, PSMD3, PSMD4, PSMD6, PSMD7, PSMD8, PSME1, RBX1, SEM1, SKP1, SNW1, UBC]
R-HSA:68882	Mitotic Anaphase	REACTOME_Pathways_27.02.2019	1.00036e-38	3.1964e-37	0.011152	0.0126727	[-1]	Group75	44.7761	90	[AHCTF1, ANAPC1, ANAPC10, ANAPC11, ANAPC15, ANAPC4, ANAPC5, ANKLE2, AURKB, BANF1, BIRC5, BUB1B, BUB3, CDC16, CDC20, CDC23, CDC26, CDCA8, CENPA, CENPE, CENPK, CKAP5, DSN1, DYNC1H1, DYNC1I2, ESPL1, INCENP, KIF18A, KNL1, MAD2L1, MIS12, NSL1, NUDC, NUF2, NUP133, NUP160, NUP43, NUP85, NUP98, PAFAH1B1, PLK1, PMF1, PPP2CA, PPP2R1A, PSMA1, PSMA2, PSMA3, PSMA4, PSMA5, PSMA6, PSMA7, PSMB1, PSMB2, PSMB3, PS…
R-HSA:5619084	ABC transporter disorders	REACTOME_Pathways_27.02.2019	2.41712e-15	1.06006e-14	0.011152	0.0126727	[-1]	Group75	44.7368	34	[PSMA1, PSMA2, PSMA3, PSMA4, PSMA5, PSMA6, PSMA7, PSMB1, PSMB2, PSMB3, PSMB4, PSMB5, PSMB6, PSMB7, PSMC1, PSMC2, PSMC3, PSMC4, PSMC5, PSMC6, PSMD11, PSMD12, PSMD13, PSMD14, PSMD2, PSMD3, PSMD4, PSMD6, PSMD7, PSMD8, PSME1, SEM1, UBC, VCP]
R-HSA:69618	Mitotic Spindle Checkpoint	REACTOME_Pathways_27.02.2019	6.724e-22	5.12705e-21	0.011152	0.0126727	[-1]	Group75	44.6429	50	[AHCTF1, ANAPC1, ANAPC10, ANAPC11, ANAPC15, ANAPC4, ANAPC5, AURKB, BIRC5, BUB1B, BUB3, CDC16, CDC20, CDC23, CDC26, CDCA8, CENPA, CENPE, CENPK, CKAP5, DSN1, DYNC1H1, DYNC1I2, INCENP, KIF18A, KNL1, MAD2L1, MIS12, NSL1, NUDC, NUF2, NUP133, NUP160, NUP43, NUP85, NUP98, PAFAH1B1, PLK1, PMF1, PPP2CA, PPP2R1A, RANGAP1, SEC13, SEH1L, SGO1, SKA1, SPC24, SPC25, SPDL1, XPO1]
R-HSA:1168372	Downstream signaling events of B Cell Receptor (BCR)	REACTOME_Pathways_27.02.2019	1.62119e-16	7.82605e-16	0.011152	0.0126727	[-1]	Group75	44.5783	37	[CUL1, NFKBIE, PPIA, PSMA1, PSMA2, PSMA3, PSMA4, PSMA5, PSMA6, PSMA7, PSMB1, PSMB2, PSMB3, PSMB4, PSMB5, PSMB6, PSMB7, PSMC1, PSMC2, PSMC3, PSMC4, PSMC5, PSMC6, PSMD11, PSMD12, PSMD13, PSMD14, PSMD2, PSMD3, PSMD4, PSMD6, PSMD7, PSMD8, PSME1, SEM1, SKP1, UBC]
R-HSA:2555396	Mitotic Metaphase and Anaphase	REACTOME_Pathways_27.02.2019	1.64056e-38	5.00371e-37	0.011152	0.0126727	[-1]	Group75	44.5545	90	[AHCTF1, ANAPC1, ANAPC10, ANAPC11, ANAPC15, ANAPC4, ANAPC5, ANKLE2, AURKB, BANF1, BIRC5, BUB1B, BUB3, CDC16, CDC20, CDC23, CDC26, CDCA8, CENPA, CENPE, CENPK, CKAP5, DSN1, DYNC1H1, DYNC1I2, ESPL1, INCENP, KIF18A, KNL1, MAD2L1, MIS12, NSL1, NUDC, NUF2, NUP133, NUP160, NUP43, NUP85, NUP98, PAFAH1B1, PLK1, PMF1, PPP2CA, PPP2R1A, PSMA1, PSMA2, PSMA3, PSMA4, PSMA5, PSMA6, PSMA7, PSMB1, PSMB2, PSMB3, PS…
R-HSA:453279	Mitotic G1-G1/S phases	REACTOME_Pathways_27.02.2019	2.74421e-28	3.47427e-27	0.011152	0.0126727	[-1]	Group75	44.2953	66	[CCNA2, CCND1, CCNH, CDC45, CDC6, CDC7, CDT1, CUL1, MCM2, MCM3, MCM4, MCM5, MCM6, MCM7, MNAT1, MYC, ORC1, ORC3, ORC4, ORC5, PCNA, POLA2, POLE2, PPP2CA, PPP2R1A, PRIM1, PSMA1, PSMA2, PSMA3, PSMA4, PSMA5, PSMA6, PSMA7, PSMB1, PSMB2, PSMB3, PSMB4, PSMB5, PSMB6, PSMB7, PSMC1, PSMC2, PSMC3, PSMC4, PSMC5, PSMC6, PSMD11, PSMD12, PSMD13, PSMD14, PSMD2, PSMD3, PSMD4, PSMD6, PSMD7, PSMD8, PSME1, RBBP4, RPA…
R-HSA:5632684	Hedgehog 'on' state	REACTOME_Pathways_27.02.2019	4.2247e-16	1.99632e-15	0.011152	0.0126727	[-1]	Group75	43.5294	37	[CDC73, CSNK1A1, CUL3, PSMA1, PSMA2, PSMA3, PSMA4, PSMA5, PSMA6, PSMA7, PSMB1, PSMB2, PSMB3, PSMB4, PSMB5, PSMB6, PSMB7, PSMC1, PSMC2, PSMC3, PSMC4, PSMC5, PSMC6, PSMD11, PSMD12, PSMD13, PSMD14, PSMD2, PSMD3, PSMD4, PSMD6, PSMD7, PSMD8, PSME1, RBX1, SEM1, UBC]
R-HSA:141424	Amplification of signal from the kinetochores	REACTOME_Pathways_27.02.2019	2.46921e-17	1.31495e-16	0.011152	0.0126727	[-1]	Group75	42.7083	41	[AHCTF1, AURKB, BIRC5, BUB1B, BUB3, CDC20, CDCA8, CENPA, CENPE, CENPK, CKAP5, DSN1, DYNC1H1, DYNC1I2, INCENP, KIF18A, KNL1, MAD2L1, MIS12, NSL1, NUDC, NUF2, NUP133, NUP160, NUP43, NUP85, NUP98, PAFAH1B1, PLK1, PMF1, PPP2CA, PPP2R1A, RANGAP1, SEC13, SEH1L, SGO1, SKA1, SPC24, SPC25, SPDL1, XPO1]
R-HSA:141444	Amplification of signal from unattached kinetochores via a MAD2 inhibitory signal	REACTOME_Pathways_27.02.2019	2.46921e-17	1.31495e-16	0.011152	0.0126727	[-1]	Group75	42.7083	41	[AHCTF1, AURKB, BIRC5, BUB1B, BUB3, CDC20, CDCA8, CENPA, CENPE, CENPK, CKAP5, DSN1, DYNC1H1, DYNC1I2, INCENP, KIF18A, KNL1, MAD2L1, MIS12, NSL1, NUDC, NUF2, NUP133, NUP160, NUP43, NUP85, NUP98, PAFAH1B1, PLK1, PMF1, PPP2CA, PPP2R1A, RANGAP1, SEC13, SEH1L, SGO1, SKA1, SPC24, SPC25, SPDL1, XPO1]
R-HSA:69481	G2/M Checkpoints	REACTOME_Pathways_27.02.2019	8.72419e-29	1.17079e-27	0.011152	0.0126727	[-1]	Group75	42.2619	71	[BARD1, BRCA1, CDC45, CDC6, CDC7, CHEK1, H2AFX, HIST1H2BC, HIST1H2BJ, HIST1H2BL, HIST2H2BE, HUS1, MCM2, MCM3, MCM4, MCM5, MCM6, MCM7, ORC1, ORC3, ORC4, ORC5, PKMYT1, PSMA1, PSMA2, PSMA3, PSMA4, PSMA5, PSMA6, PSMA7, PSMB1, PSMB2, PSMB3, PSMB4, PSMB5, PSMB6, PSMB7, PSMC1, PSMC2, PSMC3, PSMC4, PSMC5, PSMC6, PSMD11, PSMD12, PSMD13, PSMD14, PSMD2, PSMD3, PSMD4, PSMD6, PSMD7, PSMD8, PSME1, RAD17, RAD9A…
R-HSA:168253	Host Interactions with Influenza Factors	REACTOME_Pathways_27.02.2019	1.18259e-08	3.23886e-08	0.011152	0.0126727	[-1]	Group75	42.2222	19	[CPSF4, NDC1, NUP133, NUP153, NUP155, NUP160, NUP205, NUP214, NUP35, NUP43, NUP62, NUP85, NUP88, NUP98, PABPN1, RAE1, SEC13, SEH1L, TPR]
R-HSA:5689603	UCH proteinases	REACTOME_Pathways_27.02.2019	7.39965e-18	4.17241e-17	0.011152	0.0126727	[-1]	Group75	42.1569	43	[ACTB, ACTL6A, ACTR8, BAP1, BARD1, HIST2H2AC, INO80, NEDD8, PSMA1, PSMA2, PSMA3, PSMA4, PSMA5, PSMA6, PSMA7, PSMB1, PSMB2, PSMB3, PSMB4, PSMB5, PSMB6, PSMB7, PSMC1, PSMC2, PSMC3, PSMC4, PSMC5, PSMC6, PSMD11, PSMD12, PSMD13, PSMD14, PSMD2, PSMD3, PSMD4, PSMD6, PSMD7, PSMD8, PSME1, RUVBL1, SEM1, UBC, YY1]
R-HSA:1236974	ER-Phagosome pathway	REACTOME_Pathways_27.02.2019	4.74821e-15	2.05552e-14	0.011152	0.0126727	[-1]	Group75	41.8605	36	[PSMA1, PSMA2, PSMA3, PSMA4, PSMA5, PSMA6, PSMA7, PSMB1, PSMB2, PSMB3, PSMB4, PSMB5, PSMB6, PSMB7, PSMC1, PSMC2, PSMC3, PSMC4, PSMC5, PSMC6, PSMD11, PSMD12, PSMD13, PSMD14, PSMD2, PSMD3, PSMD4, PSMD6, PSMD7, PSMD8, PSME1, SEC61A1, SEC61B, SEC61G, SEM1, UBC]
R-HSA:376176	Signaling by ROBO receptors	REACTOME_Pathways_27.02.2019	3.85417e-36	1.03446e-34	0.011152	0.0126727	[-1]	Group75	41.7431	91	[CAP1, EIF4A3, EIF4G1, ELOB, ETF1, GSPT1, NCBP1, NCBP2, PABPC1, PFN1, PSMA1, PSMA2, PSMA3, PSMA4, PSMA5, PSMA6, PSMA7, PSMB1, PSMB2, PSMB3, PSMB4, PSMB5, PSMB6, PSMB7, PSMC1, PSMC2, PSMC3, PSMC4, PSMC5, PSMC6, PSMD11, PSMD12, PSMD13, PSMD14, PSMD2, PSMD3, PSMD4, PSMD6, PSMD7, PSMD8, PSME1, RBM8A, RBX1, RPL10A, RPL12, RPL13, RPL13A, RPL14, RPL15, RPL18A, RPL19, RPL23, RPL24, RPL26, RPL27A, RPL28, …
R-HSA:69620	Cell Cycle Checkpoints	REACTOME_Pathways_27.02.2019	3.19238e-48	1.53006e-46	0.011152	0.0126727	[-1]	Group75	41.6382	122	[AHCTF1, ANAPC1, ANAPC10, ANAPC11, ANAPC15, ANAPC4, ANAPC5, AURKB, BARD1, BIRC5, BRCA1, BUB1B, BUB3, CCNA2, CDC16, CDC20, CDC23, CDC26, CDC45, CDC6, CDC7, CDCA8, CENPA, CENPE, CENPK, CHEK1, CKAP5, DSN1, DYNC1H1, DYNC1I2, H2AFX, HIST1H2BC, HIST1H2BJ, HIST1H2BL, HIST2H2BE, HUS1, INCENP, KIF18A, KNL1, MAD2L1, MCM2, MCM3, MCM4, MCM5, MCM6, MCM7, MIS12, NSL1, NUDC, NUF2, NUP133, NUP160, NUP43, NUP85, …
R-HSA:5687128	MAPK6/MAPK4 signaling	REACTOME_Pathways_27.02.2019	1.09302e-13	4.28898e-13	0.011152	0.0126727	[-1]	Group75	39.3258	35	[MYC, PSMA1, PSMA2, PSMA3, PSMA4, PSMA5, PSMA6, PSMA7, PSMB1, PSMB2, PSMB3, PSMB4, PSMB5, PSMB6, PSMB7, PSMC1, PSMC2, PSMC3, PSMC4, PSMC5, PSMC6, PSMD11, PSMD12, PSMD13, PSMD14, PSMD2, PSMD3, PSMD4, PSMD6, PSMD7, PSMD8, PSME1, SEM1, UBC, XPO1]
R-HSA:4086400	PCP/CE pathway	REACTOME_Pathways_27.02.2019	5.82196e-14	2.33924e-13	0.011152	0.0126727	[-1]	Group75	39.1304	36	[CLTC, PFN1, PSMA1, PSMA2, PSMA3, PSMA4, PSMA5, PSMA6, PSMA7, PSMB1, PSMB2, PSMB3, PSMB4, PSMB5, PSMB6, PSMB7, PSMC1, PSMC2, PSMC3, PSMC4, PSMC5, PSMC6, PSMD11, PSMD12, PSMD13, PSMD14, PSMD2, PSMD3, PSMD4, PSMD6, PSMD7, PSMD8, PSME1, RAC3, SEM1, UBC]
R-HSA:69275	G2/M Transition	REACTOME_Pathways_27.02.2019	8.64958e-28	1.01822e-26	0.011152	0.0126727	[-1]	Group75	38.7755	76	[ACTR1A, CCNA2, CCNH, CCP110, CDK11A, CEP192, CKAP5, CUL1, DCTN2, DCTN3, DYNC1H1, DYNC1I2, FGFR1OP, HAUS1, HAUS3, HAUS4, HAUS5, HAUS8, MNAT1, MZT1, NEDD1, PAFAH1B1, PKMYT1, PLK1, PLK4, PPME1, PPP1R12A, PPP2CA, PPP2R1A, PSMA1, PSMA2, PSMA3, PSMA4, PSMA5, PSMA6, PSMA7, PSMB1, PSMB2, PSMB3, PSMB4, PSMB5, PSMB6, PSMB7, PSMC1, PSMC2, PSMC3, PSMC4, PSMC5, PSMC6, PSMD11, PSMD12, PSMD13, PSMD14, PSMD2, P…
R-HSA:5607764	CLEC7A (Dectin-1) signaling	REACTOME_Pathways_27.02.2019	8.7236e-15	3.68147e-14	0.011152	0.0126727	[-1]	Group75	38.6139	39	[CUL1, PDPK1, PSMA1, PSMA2, PSMA3, PSMA4, PSMA5, PSMA6, PSMA7, PSMB1, PSMB2, PSMB3, PSMB4, PSMB5, PSMB6, PSMB7, PSMC1, PSMC2, PSMC3, PSMC4, PSMC5, PSMC6, PSMD11, PSMD12, PSMD13, PSMD14, PSMD2, PSMD3, PSMD4, PSMD6, PSMD7, PSMD8, PSME1, SEM1, SKP1, UBA3, UBC, UBE2M, UBE2N]
R-HSA:453274	Mitotic G2-G2/M phases	REACTOME_Pathways_27.02.2019	1.886e-27	2.10918e-26	0.011152	0.0126727	[-1]	Group75	38.3838	76	[ACTR1A, CCNA2, CCNH, CCP110, CDK11A, CEP192, CKAP5, CUL1, DCTN2, DCTN3, DYNC1H1, DYNC1I2, FGFR1OP, HAUS1, HAUS3, HAUS4, HAUS5, HAUS8, MNAT1, MZT1, NEDD1, PAFAH1B1, PKMYT1, PLK1, PLK4, PPME1, PPP1R12A, PPP2CA, PPP2R1A, PSMA1, PSMA2, PSMA3, PSMA4, PSMA5, PSMA6, PSMA7, PSMB1, PSMB2, PSMB3, PSMB4, PSMB5, PSMB6, PSMB7, PSMC1, PSMC2, PSMC3, PSMC4, PSMC5, PSMC6, PSMD11, PSMD12, PSMD13, PSMD14, PSMD2, P…
R-HSA:202424	Downstream TCR signaling	REACTOME_Pathways_27.02.2019	9.77745e-14	3.88205e-13	0.011152	0.0126727	[-1]	Group75	37.7551	37	[CUL1, PDPK1, PSMA1, PSMA2, PSMA3, PSMA4, PSMA5, PSMA6, PSMA7, PSMB1, PSMB2, PSMB3, PSMB4, PSMB5, PSMB6, PSMB7, PSMC1, PSMC2, PSMC3, PSMC4, PSMC5, PSMC6, PSMD11, PSMD12, PSMD13, PSMD14, PSMD2, PSMD3, PSMD4, PSMD6, PSMD7, PSMD8, PSME1, SEM1, SKP1, UBC, UBE2N]
R-HSA:351202	Metabolism of polyamines	REACTOME_Pathways_27.02.2019	7.28254e-12	2.57189e-11	0.011152	0.0126727	[-1]	Group75	37.2093	32	[PSMA1, PSMA2, PSMA3, PSMA4, PSMA5, PSMA6, PSMA7, PSMB1, PSMB2, PSMB3, PSMB4, PSMB5, PSMB6, PSMB7, PSMC1, PSMC2, PSMC3, PSMC4, PSMC5, PSMC6, PSMD11, PSMD12, PSMD13, PSMD14, PSMD2, PSMD3, PSMD4, PSMD6, PSMD7, PSMD8, PSME1, SEM1]
R-HSA:8878159	Transcriptional regulation by RUNX3	REACTOME_Pathways_27.02.2019	3.88055e-13	1.47946e-12	0.011152	0.0126727	[-1]	Group75	37.1134	36	[CCND1, MYC, PSMA1, PSMA2, PSMA3, PSMA4, PSMA5, PSMA6, PSMA7, PSMB1, PSMB2, PSMB3, PSMB4, PSMB5, PSMB6, PSMB7, PSMC1, PSMC2, PSMC3, PSMC4, PSMC5, PSMC6, PSMD11, PSMD12, PSMD13, PSMD14, PSMD2, PSMD3, PSMD4, PSMD6, PSMD7, PSMD8, PSME1, SEM1, SNW1, UBC]
R-HSA:5663205	Infectious disease	REACTOME_Pathways_27.02.2019	3.73877e-56	2.28065e-54	0.011152	0.0126727	[-1]	Group75	37.0455	163	[ATP6V1H, BANF1, CBLL1, CCNH, CCNK, CDK9, CHMP2A, CHMP5, CHMP6, CHMP7, CLTC, CPSF4, CTDP1, EEF2, ELL, ELOB, ERCC2, ERCC3, FEN1, GRB2, GRSF1, GTF2A1, GTF2A2, GTF2B, GTF2E1, GTF2E2, GTF2F2, GTF2H1, GTF2H3, GTF2H4, HGS, HMGA1, MNAT1, NCBP1, NCBP2, NDC1, NELFA, NELFB, NELFE, NPM1, NUP133, NUP153, NUP155, NUP160, NUP205, NUP214, NUP35, NUP43, NUP62, NUP85, NUP88, NUP98, PABPN1, POLR2A, POLR2C, POLR2E,…
R-HSA:382556	ABC-family proteins mediated transport	REACTOME_Pathways_27.02.2019	1.07229e-13	4.23239e-13	0.011152	0.0126727	[-1]	Group75	36.8932	38	[ABCF1, ABCG1, EIF2S1, EIF2S2, PSMA1, PSMA2, PSMA3, PSMA4, PSMA5, PSMA6, PSMA7, PSMB1, PSMB2, PSMB3, PSMB4, PSMB5, PSMB6, PSMB7, PSMC1, PSMC2, PSMC3, PSMC4, PSMC5, PSMC6, PSMD11, PSMD12, PSMD13, PSMD14, PSMD2, PSMD3, PSMD4, PSMD6, PSMD7, PSMD8, PSME1, SEM1, UBC, VCP]
R-HSA:2980766	Nuclear Envelope Breakdown	REACTOME_Pathways_27.02.2019	1.8978e-07	4.69899e-07	0.011152	0.0126727	[-1]	Group75	36.5385	19	[BANF1, NDC1, NUP133, NUP153, NUP155, NUP160, NUP205, NUP214, NUP35, NUP43, NUP62, NUP85, NUP88, NUP98, PLK1, RAE1, SEC13, SEH1L, TPR]
R-HSA:5668541	TNFR2 non-canonical NF-kB pathway	REACTOME_Pathways_27.02.2019	4.161e-13	1.57742e-12	0.011152	0.0126727	[-1]	Group75	36.2745	37	[CUL1, PSMA1, PSMA2, PSMA3, PSMA4, PSMA5, PSMA6, PSMA7, PSMB1, PSMB2, PSMB3, PSMB4, PSMB5, PSMB6, PSMB7, PSMC1, PSMC2, PSMC3, PSMC4, PSMC5, PSMC6, PSMD11, PSMD12, PSMD13, PSMD14, PSMD2, PSMD3, PSMD4, PSMD6, PSMD7, PSMD8, PSME1, SEM1, SKP1, UBA3, UBC, UBE2M]
R-HSA:9020702	Interleukin-1 signaling	REACTOME_Pathways_27.02.2019	5.89255e-13	2.22129e-12	0.011152	0.0126727	[-1]	Group75	35.9223	37	[CUL1, PSMA1, PSMA2, PSMA3, PSMA4, PSMA5, PSMA6, PSMA7, PSMB1, PSMB2, PSMB3, PSMB4, PSMB5, PSMB6, PSMB7, PSMC1, PSMC2, PSMC3, PSMC4, PSMC5, PSMC6, PSMD11, PSMD12, PSMD13, PSMD14, PSMD2, PSMD3, PSMD4, PSMD6, PSMD7, PSMD8, PSME1, RBX1, SEM1, SKP1, UBC, UBE2N]
R-HSA:2500257	Resolution of Sister Chromatid Cohesion	REACTOME_Pathways_27.02.2019	2.33434e-15	1.03049e-14	0.011152	0.0126727	[-1]	Group75	35.7143	45	[AHCTF1, AURKB, BIRC5, BUB1B, BUB3, CDC20, CDCA8, CENPA, CENPE, CENPK, CKAP5, DSN1, DYNC1H1, DYNC1I2, INCENP, KIF18A, KNL1, MAD2L1, MIS12, NSL1, NUDC, NUF2, NUP133, NUP160, NUP43, NUP85, NUP98, PAFAH1B1, PLK1, PMF1, PPP2CA, PPP2R1A, RAD21, RANGAP1, SEC13, SEH1L, SGO1, SKA1, SMC3, SPC24, SPC25, SPDL1, TUBA1C, TUBB8, XPO1]
R-HSA:1236975	Antigen processing-Cross presentation	REACTOME_Pathways_27.02.2019	2.22543e-12	7.98537e-12	0.011152	0.0126727	[-1]	Group75	35.2941	36	[PSMA1, PSMA2, PSMA3, PSMA4, PSMA5, PSMA6, PSMA7, PSMB1, PSMB2, PSMB3, PSMB4, PSMB5, PSMB6, PSMB7, PSMC1, PSMC2, PSMC3, PSMC4, PSMC5, PSMC6, PSMD11, PSMD12, PSMD13, PSMD14, PSMD2, PSMD3, PSMD4, PSMD6, PSMD7, PSMD8, PSME1, SEC61A1, SEC61B, SEC61G, SEM1, UBC]
R-HSA:68886	M Phase	REACTOME_Pathways_27.02.2019	1.1236e-44	4.43492e-43	0.011152	0.0126727	[-1]	Group75	35.1899	139	[ACTR1A, AHCTF1, ANAPC1, ANAPC10, ANAPC11, ANAPC15, ANAPC4, ANAPC5, ANKLE2, AURKB, BANF1, BIRC5, BUB1B, BUB3, CCP110, CDC16, CDC20, CDC23, CDC26, CDCA8, CENPA, CENPE, CENPK, CEP192, CKAP5, CSNK2B, DCTN2, DCTN3, DSN1, DYNC1H1, DYNC1I2, ESPL1, FGFR1OP, H2AFX, H2AFZ, H3F3A, HAUS1, HAUS3, HAUS4, HAUS5, HAUS8, HIST1H2BC, HIST1H2BJ, HIST1H2BL, HIST2H2AC, HIST2H2BE, HIST2H3D, INCENP, KIF18A, KNL1, MAD2L…
R-HSA:68877	Mitotic Prometaphase	REACTOME_Pathways_27.02.2019	1.28493e-22	1.07773e-21	0.011152	0.0126727	[-1]	Group75	35	70	[ACTR1A, AHCTF1, AURKB, BIRC5, BUB1B, BUB3, CCP110, CDC20, CDCA8, CENPA, CENPE, CENPK, CEP192, CKAP5, CSNK2B, DCTN2, DCTN3, DSN1, DYNC1H1, DYNC1I2, FGFR1OP, HAUS1, HAUS3, HAUS4, HAUS5, HAUS8, INCENP, KIF18A, KNL1, MAD2L1, MIS12, MZT1, NCAPG, NCAPH, NEDD1, NSL1, NUDC, NUF2, NUP133, NUP160, NUP43, NUP85, NUP98, PAFAH1B1, PLK1, PLK4, PMF1, PPP2CA, PPP2R1A, RAD21, RANGAP1, SEC13, SEH1L, SGO1, SKA1, S…
R-HSA:69278	Cell Cycle, Mitotic	REACTOME_Pathways_27.02.2019	7.17418e-59	5.34875e-57	0.011152	0.0126727	[-1]	Group75	34.5725	186	[ACTR1A, AHCTF1, ANAPC1, ANAPC10, ANAPC11, ANAPC15, ANAPC4, ANAPC5, ANKLE2, AURKB, BANF1, BIRC5, BUB1B, BUB3, CCNA2, CCND1, CCNH, CCP110, CDC16, CDC20, CDC23, CDC26, CDC45, CDC6, CDC7, CDCA8, CDK11A, CDT1, CENPA, CENPE, CENPK, CEP192, CKAP5, CSNK2B, CUL1, DCTN2, DCTN3, DSN1, DYNC1H1, DYNC1I2, ESPL1, FEN1, FGFR1OP, GINS1, GINS2, GINS3, H2AFX, H2AFZ, H3F3A, HAUS1, HAUS3, HAUS4, HAUS5, HAUS8, HIST1H…
R-HSA:983705	Signaling by the B Cell Receptor (BCR)	REACTOME_Pathways_27.02.2019	2.22354e-12	8.02148e-12	0.011152	0.0126727	[-1]	Group75	33.9286	38	[CUL1, GRB2, NFKBIE, PPIA, PSMA1, PSMA2, PSMA3, PSMA4, PSMA5, PSMA6, PSMA7, PSMB1, PSMB2, PSMB3, PSMB4, PSMB5, PSMB6, PSMB7, PSMC1, PSMC2, PSMC3, PSMC4, PSMC5, PSMC6, PSMD11, PSMD12, PSMD13, PSMD14, PSMD2, PSMD3, PSMD4, PSMD6, PSMD7, PSMD8, PSME1, SEM1, SKP1, UBC]
KEGG:04110	Cell cycle	KEGG_27.02.2019	1.6406e-13	6.36325e-13	0.011152	0.0126727	[-1]	Group75	33.871	42	[ANAPC1, ANAPC10, ANAPC11, ANAPC4, ANAPC5, BUB1B, BUB3, CCNA2, CCND1, CCNH, CDC16, CDC20, CDC23, CDC26, CDC45, CDC6, CDC7, CHEK1, CUL1, ESPL1, MAD2L1, MAD2L2, MCM2, MCM3, MCM4, MCM5, MCM6, MCM7, MYC, ORC1, ORC3, ORC4, ORC5, PCNA, PKMYT1, PLK1, RAD21, RBX1, SKP1, SMC3, WEE1, ZBTB17]
R-HSA:8939236	RUNX1 regulates transcription of genes involved in differentiation of HSCs	REACTOME_Pathways_27.02.2019	4.4501e-14	1.80971e-13	0.011152	0.0126727	[-1]	Group75	33.8462	44	[CCNH, H2AFX, H2AFZ, H3F3A, HIST1H2BC, HIST1H2BJ, HIST1H2BL, HIST2H2AC, HIST2H2BE, HIST2H3D, MNAT1, PSMA1, PSMA2, PSMA3, PSMA4, PSMA5, PSMA6, PSMA7, PSMB1, PSMB2, PSMB3, PSMB4, PSMB5, PSMB6, PSMB7, PSMC1, PSMC2, PSMC3, PSMC4, PSMC5, PSMC6, PSMD11, PSMD12, PSMD13, PSMD14, PSMD2, PSMD3, PSMD4, PSMD6, PSMD7, PSMD8, PSME1, SEM1, UBC]
R-HSA:5610787	Hedgehog 'off' state	REACTOME_Pathways_27.02.2019	3.03999e-12	1.08502e-11	0.011152	0.0126727	[-1]	Group75	33.6283	38	[CSNK1A1, CUL1, PSMA1, PSMA2, PSMA3, PSMA4, PSMA5, PSMA6, PSMA7, PSMB1, PSMB2, PSMB3, PSMB4, PSMB5, PSMB6, PSMB7, PSMC1, PSMC2, PSMC3, PSMC4, PSMC5, PSMC6, PSMD11, PSMD12, PSMD13, PSMD14, PSMD2, PSMD3, PSMD4, PSMD6, PSMD7, PSMD8, PSME1, RBX1, SEM1, SKP1, TUBA1C, UBC]
R-HSA:5663220	RHO GTPases Activate Formins	REACTOME_Pathways_27.02.2019	8.57009e-15	3.63958e-14	0.011152	0.0126727	[-1]	Group75	33.5714	47	[ACTB, ACTG1, AHCTF1, AURKB, BIRC5, BUB1B, BUB3, CDC20, CDCA8, CENPA, CENPE, CENPK, CKAP5, DSN1, DYNC1H1, DYNC1I2, INCENP, KIF18A, KNL1, MAD2L1, MIS12, NSL1, NUDC, NUF2, NUP133, NUP160, NUP43, NUP85, NUP98, PAFAH1B1, PFN1, PLK1, PMF1, PPP2CA, PPP2R1A, RANGAP1, SEC13, SEH1L, SGO1, SKA1, SPC24, SPC25, SPDL1, SRF, TUBA1C, TUBB8, XPO1]
R-HSA:1640170	Cell Cycle	REACTOME_Pathways_27.02.2019	8.12975e-65	9.09177e-63	0.011152	0.0126727	[-1]	Group75	33.2815	214	[ACD, ACTR1A, AHCTF1, ANAPC1, ANAPC10, ANAPC11, ANAPC15, ANAPC4, ANAPC5, ANKLE2, AURKB, BANF1, BARD1, BIRC5, BRCA1, BRCA2, BUB1B, BUB3, CCNA2, CCND1, CCNH, CCP110, CDC16, CDC20, CDC23, CDC26, CDC45, CDC6, CDC7, CDCA8, CDK11A, CDT1, CENPA, CENPE, CENPK, CENPW, CEP192, CHEK1, CKAP5, CSNK2B, CUL1, DCTN2, DCTN3, DSN1, DYNC1H1, DYNC1I2, ESPL1, FEN1, FGFR1OP, GINS1, GINS2, GINS3, H2AFX, H2AFZ, H3F3A, H…
R-HSA:8878166	Transcriptional regulation by RUNX2	REACTOME_Pathways_27.02.2019	1.52376e-12	5.68025e-12	0.011152	0.0126727	[-1]	Group75	33.0578	40	[CCND1, CUL1, HDAC3, PPARGC1B, PSMA1, PSMA2, PSMA3, PSMA4, PSMA5, PSMA6, PSMA7, PSMB1, PSMB2, PSMB3, PSMB4, PSMB5, PSMB6, PSMB7, PSMC1, PSMC2, PSMC3, PSMC4, PSMC5, PSMC6, PSMD11, PSMD12, PSMD13, PSMD14, PSMD2, PSMD3, PSMD4, PSMD6, PSMD7, PSMD8, PSME1, RBM14, RBX1, SEM1, SKP1, UBC]
R-HSA:380270	Recruitment of mitotic centrosome proteins and complexes	REACTOME_Pathways_27.02.2019	7.20848e-09	2.01537e-08	0.011152	0.0126727	[-1]	Group75	32.9268	27	[ACTR1A, CCP110, CDK11A, CEP192, CKAP5, DCTN2, DCTN3, DYNC1H1, DYNC1I2, FGFR1OP, HAUS1, HAUS3, HAUS4, HAUS5, HAUS8, MZT1, NEDD1, PAFAH1B1, PLK1, PLK4, PPP2R1A, TUBB, TUBG1, TUBGCP2, TUBGCP3, TUBGCP5, TUBGCP6]
R-HSA:380287	Centrosome maturation	REACTOME_Pathways_27.02.2019	7.20848e-09	2.01537e-08	0.011152	0.0126727	[-1]	Group75	32.9268	27	[ACTR1A, CCP110, CDK11A, CEP192, CKAP5, DCTN2, DCTN3, DYNC1H1, DYNC1I2, FGFR1OP, HAUS1, HAUS3, HAUS4, HAUS5, HAUS8, MZT1, NEDD1, PAFAH1B1, PLK1, PLK4, PPP2R1A, TUBB, TUBG1, TUBGCP2, TUBGCP3, TUBGCP5, TUBGCP6]
R-HSA:1169408	ISG15 antiviral mechanism	REACTOME_Pathways_27.02.2019	5.08443e-08	1.31724e-07	0.011152	0.0126727	[-1]	Group75	32.8767	24	[ARIH1, EIF4A1, EIF4A3, EIF4G1, EIF4G2, NDC1, NUP133, NUP153, NUP155, NUP160, NUP205, NUP214, NUP35, NUP43, NUP62, NUP85, NUP88, NUP98, RAE1, SEC13, SEH1L, TPR, UBC, UBE2N]
R-HSA:6807070	PTEN Regulation	REACTOME_Pathways_27.02.2019	4.10921e-14	1.68127e-13	0.011152	0.0126727	[-1]	Group75	32.8571	46	[CHD4, CSNK2B, HDAC3, LAMTOR2, LAMTOR3, LAMTOR4, MKRN1, MLST8, MTOR, PSMA1, PSMA2, PSMA3, PSMA4, PSMA5, PSMA6, PSMA7, PSMB1, PSMB2, PSMB3, PSMB4, PSMB5, PSMB6, PSMB7, PSMC1, PSMC2, PSMC3, PSMC4, PSMC5, PSMC6, PSMD11, PSMD12, PSMD13, PSMD14, PSMD2, PSMD3, PSMD4, PSMD6, PSMD7, PSMD8, PSME1, RBBP4, RCOR1, RPTOR, SEM1, UBC, USP7]
R-HSA:5693607	Processing of DNA double-strand break ends	REACTOME_Pathways_27.02.2019	1.708e-09	5.09363e-09	0.011152	0.0126727	[-1]	Group75	31.6327	31	[BARD1, BRCA1, CCNA2, CHEK1, H2AFX, HIST1H2BC, HIST1H2BJ, HIST1H2BL, HIST2H2BE, HUS1, PPP4C, PPP4R2, RAD17, RAD9A, RBBP8, RFC2, RFC3, RFC5, RMI1, RNF168, RNF4, RNF8, RPA2, RPA3, SUMO2, TIPIN, TOP3A, TOPBP1, UBC, UBE2I, UBE2N]
R-HSA:202403	TCR signaling	REACTOME_Pathways_27.02.2019	8.03038e-11	2.65438e-10	0.011152	0.0126727	[-1]	Group75	31.0924	37	[CUL1, PDPK1, PSMA1, PSMA2, PSMA3, PSMA4, PSMA5, PSMA6, PSMA7, PSMB1, PSMB2, PSMB3, PSMB4, PSMB5, PSMB6, PSMB7, PSMC1, PSMC2, PSMC3, PSMC4, PSMC5, PSMC6, PSMD11, PSMD12, PSMD13, PSMD14, PSMD2, PSMD3, PSMD4, PSMD6, PSMD7, PSMD8, PSME1, SEM1, SKP1, UBC, UBE2N]
R-HSA:8854518	AURKA Activation by TPX2	REACTOME_Pathways_27.02.2019	9.96126e-07	2.3128e-06	0.011152	0.0126727	[-1]	Group75	30.137	22	[ACTR1A, CCP110, CEP192, CKAP5, DCTN2, DCTN3, DYNC1H1, DYNC1I2, FGFR1OP, HAUS1, HAUS3, HAUS4, HAUS5, HAUS8, NEDD1, PAFAH1B1, PLK1, PLK4, PPP2R1A, TPX2, TUBB, TUBG1]
R-HSA:380259	Loss of Nlp from mitotic centrosomes	REACTOME_Pathways_27.02.2019	1.89983e-06	4.30672e-06	0.011152	0.0126727	[-1]	Group75	30	21	[ACTR1A, CCP110, CEP192, CKAP5, DCTN2, DCTN3, DYNC1H1, DYNC1I2, FGFR1OP, HAUS1, HAUS3, HAUS4, HAUS5, HAUS8, NEDD1, PAFAH1B1, PLK1, PLK4, PPP2R1A, TUBB, TUBG1]
R-HSA:380284	Loss of proteins required for interphase microtubule organization from the centrosome	REACTOME_Pathways_27.02.2019	1.89983e-06	4.30672e-06	0.011152	0.0126727	[-1]	Group75	30	21	[ACTR1A, CCP110, CEP192, CKAP5, DCTN2, DCTN3, DYNC1H1, DYNC1I2, FGFR1OP, HAUS1, HAUS3, HAUS4, HAUS5, HAUS8, NEDD1, PAFAH1B1, PLK1, PLK4, PPP2R1A, TUBB, TUBG1]
R-HSA:380320	Recruitment of NuMA to mitotic centrosomes	REACTOME_Pathways_27.02.2019	4.52951e-08	1.17802e-07	0.011152	0.0126727	[-1]	Group75	29.7872	28	[ACTR1A, CCP110, CEP192, CKAP5, DCTN2, DCTN3, DYNC1H1, DYNC1I2, FGFR1OP, HAUS1, HAUS3, HAUS4, HAUS5, HAUS8, MZT1, NEDD1, PAFAH1B1, PLK1, PLK4, PPP2R1A, TUBA1C, TUBB, TUBB8, TUBG1, TUBGCP2, TUBGCP3, TUBGCP5, TUBGCP6]
R-HSA:2565942	Regulation of PLK1 Activity at G2/M Transition	REACTOME_Pathways_27.02.2019	6.42756e-07	1.52399e-06	0.011152	0.0126727	[-1]	Group75	28.4091	25	[ACTR1A, CCP110, CEP192, CKAP5, CUL1, DCTN2, DCTN3, DYNC1H1, DYNC1I2, FGFR1OP, HAUS1, HAUS3, HAUS4, HAUS5, HAUS8, NEDD1, PAFAH1B1, PLK1, PLK4, PPP1R12A, PPP2R1A, SKP1, TUBB, TUBG1, UBC]
R-HSA:2454202	Fc epsilon receptor (FCERI) signaling	REACTOME_Pathways_27.02.2019	8.83732e-10	2.70769e-09	0.011152	0.0126727	[-1]	Group75	28.3582	38	[CUL1, GRB2, PDPK1, PSMA1, PSMA2, PSMA3, PSMA4, PSMA5, PSMA6, PSMA7, PSMB1, PSMB2, PSMB3, PSMB4, PSMB5, PSMB6, PSMB7, PSMC1, PSMC2, PSMC3, PSMC4, PSMC5, PSMC6, PSMD11, PSMD12, PSMD13, PSMD14, PSMD2, PSMD3, PSMD4, PSMD6, PSMD7, PSMD8, PSME1, SEM1, SKP1, UBC, UBE2N]
R-HSA:446652	Interleukin-1 family signaling	REACTOME_Pathways_27.02.2019	7.48056e-10	2.3025e-09	0.011152	0.0126727	[-1]	Group75	28.0576	39	[CUL1, PSMA1, PSMA2, PSMA3, PSMA4, PSMA5, PSMA6, PSMA7, PSMB1, PSMB2, PSMB3, PSMB4, PSMB5, PSMB6, PSMB7, PSMC1, PSMC2, PSMC3, PSMC4, PSMC5, PSMC6, PSMD11, PSMD12, PSMD13, PSMD14, PSMD2, PSMD3, PSMD4, PSMD6, PSMD7, PSMD8, PSME1, PTPN11, PTPN23, RBX1, SEM1, SKP1, UBC, UBE2N]
R-HSA:5358351	Signaling by Hedgehog	REACTOME_Pathways_27.02.2019	5.26992e-10	1.62955e-09	0.011152	0.0126727	[-1]	Group75	27.5168	41	[CDC73, CSNK1A1, CUL1, CUL3, PSMA1, PSMA2, PSMA3, PSMA4, PSMA5, PSMA6, PSMA7, PSMB1, PSMB2, PSMB3, PSMB4, PSMB5, PSMB6, PSMB7, PSMC1, PSMC2, PSMC3, PSMC4, PSMC5, PSMC6, PSMD11, PSMD12, PSMD13, PSMD14, PSMD2, PSMD3, PSMD4, PSMD6, PSMD7, PSMD8, PSME1, RBX1, SEM1, SKP1, TUBA1C, UBC, VCP]
R-HSA:5621481	C-type lectin receptors (CLRs)	REACTOME_Pathways_27.02.2019	1.84257e-09	5.42264e-09	0.011152	0.0126727	[-1]	Group75	27.2727	39	[CUL1, PDPK1, PSMA1, PSMA2, PSMA3, PSMA4, PSMA5, PSMA6, PSMA7, PSMB1, PSMB2, PSMB3, PSMB4, PSMB5, PSMB6, PSMB7, PSMC1, PSMC2, PSMC3, PSMC4, PSMC5, PSMC6, PSMD11, PSMD12, PSMD13, PSMD14, PSMD2, PSMD3, PSMD4, PSMD6, PSMD7, PSMD8, PSME1, SEM1, SKP1, UBA3, UBC, UBE2M, UBE2N]
R-HSA:4551638	SUMOylation of chromatin organization proteins	REACTOME_Pathways_27.02.2019	3.53335e-05	7.27264e-05	0.011152	0.0126727	[-1]	Group75	26.7606	19	[NDC1, NUP133, NUP153, NUP155, NUP160, NUP205, NUP214, NUP35, NUP43, NUP62, NUP85, NUP88, NUP98, RAE1, SEC13, SEH1L, SUMO2, TPR, UBE2I]
R-HSA:69473	G2/M DNA damage checkpoint	REACTOME_Pathways_27.02.2019	1.01661e-05	2.17938e-05	0.011152	0.0126727	[-1]	Group75	25.2632	24	[BARD1, BRCA1, CHEK1, H2AFX, HIST1H2BC, HIST1H2BJ, HIST1H2BL, HIST2H2BE, HUS1, RAD17, RAD9A, RBBP8, RFC2, RFC3, RFC5, RMI1, RNF168, RNF8, RPA2, RPA3, TOP3A, TOPBP1, UBE2N, WEE1]
R-HSA:3858494	Beta-catenin independent WNT signaling	REACTOME_Pathways_27.02.2019	1.08266e-07	2.74137e-07	0.011152	0.0126727	[-1]	Group75	24.8276	36	[CLTC, PFN1, PSMA1, PSMA2, PSMA3, PSMA4, PSMA5, PSMA6, PSMA7, PSMB1, PSMB2, PSMB3, PSMB4, PSMB5, PSMB6, PSMB7, PSMC1, PSMC2, PSMC3, PSMC4, PSMC5, PSMC6, PSMD11, PSMD12, PSMD13, PSMD14, PSMD2, PSMD3, PSMD4, PSMD6, PSMD7, PSMD8, PSME1, RAC3, SEM1, UBC]
R-HSA:5689880	Ub-specific processing proteases	REACTOME_Pathways_27.02.2019	1.16626e-10	3.79885e-10	0.011152	0.0126727	[-1]	Group75	24.5455	54	[CCNA2, CCP110, CDC20, HGS, HIST1H2BC, HIST1H2BJ, HIST1H2BL, HIST2H2AC, HIST2H2BE, MYC, PSMA1, PSMA2, PSMA3, PSMA4, PSMA5, PSMA6, PSMA7, PSMB1, PSMB2, PSMB3, PSMB4, PSMB5, PSMB6, PSMB7, PSMC1, PSMC2, PSMC3, PSMC4, PSMC5, PSMC6, PSMD11, PSMD12, PSMD13, PSMD14, PSMD2, PSMD3, PSMD4, PSMD6, PSMD7, PSMD8, PSME1, RUVBL1, SEM1, TADA3, TAF10, TOMM20, TRRAP, UBC, UFD1, USP10, USP37, USP7, VDAC1, WDR48]
R-HSA:71291	Metabolism of amino acids and derivatives	REACTOME_Pathways_27.02.2019	1.21728e-16	6.05031e-16	0.011152	0.0126727	[-1]	Group75	24.3243	90	[DARS, IARS, KARS, LARS, MARS, NDUFAB1, PRODH2, PSMA1, PSMA2, PSMA3, PSMA4, PSMA5, PSMA6, PSMA7, PSMB1, PSMB2, PSMB3, PSMB4, PSMB5, PSMB6, PSMB7, PSMC1, PSMC2, PSMC3, PSMC4, PSMC5, PSMC6, PSMD11, PSMD12, PSMD13, PSMD14, PSMD2, PSMD3, PSMD4, PSMD6, PSMD7, PSMD8, PSME1, PSTK, QARS, RPL10A, RPL12, RPL13, RPL13A, RPL14, RPL15, RPL18A, RPL19, RPL23, RPL24, RPL26, RPL27A, RPL28, RPL29, RPL3, RPL31, RPL…
R-HSA:5619115	Disorders of transmembrane transporters	REACTOME_Pathways_27.02.2019	2.83118e-07	6.88304e-07	0.011152	0.0126727	[-1]	Group75	24.3056	35	[PSMA1, PSMA2, PSMA3, PSMA4, PSMA5, PSMA6, PSMA7, PSMB1, PSMB2, PSMB3, PSMB4, PSMB5, PSMB6, PSMB7, PSMC1, PSMC2, PSMC3, PSMC4, PSMC5, PSMC6, PSMD11, PSMD12, PSMD13, PSMD14, PSMD2, PSMD3, PSMD4, PSMD6, PSMD7, PSMD8, PSME1, SEM1, TPR, UBC, VCP]
R-HSA:8951664	Neddylation	REACTOME_Pathways_27.02.2019	1.76555e-10	5.66835e-10	0.011152	0.0126727	[-1]	Group75	23.9316	56	[BIRC5, COPS2, COPS3, COPS4, COPS5, COPS6, COPS8, CUL1, CUL3, DDB1, DTL, ELOB, GPS1, LRR1, NAE1, NEDD8, PSMA1, PSMA2, PSMA3, PSMA4, PSMA5, PSMA6, PSMA7, PSMB1, PSMB2, PSMB3, PSMB4, PSMB5, PSMB6, PSMB7, PSMC1, PSMC2, PSMC3, PSMC4, PSMC5, PSMC6, PSMD11, PSMD12, PSMD13, PSMD14, PSMD2, PSMD3, PSMD4, PSMD6, PSMD7, PSMD8, PSME1, RBX1, SEM1, SKP1, UBA3, UBC, UBE2D3, UBE2M, VHL, WDR5]
R-HSA:2262752	Cellular responses to stress	REACTOME_Pathways_27.02.2019	3.25478e-18	1.94996e-17	0.011152	0.0126727	[-1]	Group75	23.8979	103	[ACD, ACTR10, ACTR1A, ANAPC1, ANAPC10, ANAPC11, ANAPC15, ANAPC4, ANAPC5, CAPZB, CCNA2, CDC16, CDC23, CDC26, CYCS, DCTN2, DCTN3, DCTN4, DCTN5, DCTN6, DYNC1H1, DYNC1I2, EGLN2, ELOB, EP400, H2AFX, H2AFZ, H3F3A, HIST1H2BC, HIST1H2BJ, HIST1H2BL, HIST2H2AC, HIST2H2BE, HIST2H3D, HMGA1, HSF1, HSPA9, MLST8, MTOR, NDC1, NUP133, NUP153, NUP155, NUP160, NUP205, NUP214, NUP35, NUP43, NUP62, NUP85, NUP88, NUP9…
R-HSA:201681	TCF dependent signaling in response to WNT	REACTOME_Pathways_27.02.2019	4.03287e-09	1.15643e-08	0.011152	0.0126727	[-1]	Group75	22.7468	53	[CDC73, CSNK1A1, CSNK2B, CUL3, H2AFX, H2AFZ, H3F3A, HIST1H2BC, HIST1H2BJ, HIST1H2BL, HIST2H2AC, HIST2H2BE, HIST2H3D, MYC, PPP2CA, PPP2R1A, PSMA1, PSMA2, PSMA3, PSMA4, PSMA5, PSMA6, PSMA7, PSMB1, PSMB2, PSMB3, PSMB4, PSMB5, PSMB6, PSMB7, PSMC1, PSMC2, PSMC3, PSMC4, PSMC5, PSMC6, PSMD11, PSMD12, PSMD13, PSMD14, PSMD2, PSMD3, PSMD4, PSMD6, PSMD7, PSMD8, PSME1, RBX1, RUVBL1, SEM1, TRRAP, UBC, XPO1]
R-HSA:109581	Apoptosis	REACTOME_Pathways_27.02.2019	5.80882e-07	1.38709e-06	0.011152	0.0126727	[-1]	Group75	22.4719	40	[ACIN1, CFLAR, CYCS, DNM1L, FNTA, OPA1, PSMA1, PSMA2, PSMA3, PSMA4, PSMA5, PSMA6, PSMA7, PSMB1, PSMB2, PSMB3, PSMB4, PSMB5, PSMB6, PSMB7, PSMC1, PSMC2, PSMC3, PSMC4, PSMC5, PSMC6, PSMD11, PSMD12, PSMD13, PSMD14, PSMD2, PSMD3, PSMD4, PSMD6, PSMD7, PSMD8, PSME1, PTK2, SEM1, UBC]
R-HSA:5620912	Anchoring of the basal body to the plasma membrane	REACTOME_Pathways_27.02.2019	0.000198259	0.000383377	0.011152	0.0126727	[-1]	Group75	22.449	22	[ACTR1A, CCP110, CEP192, CEP97, CKAP5, DCTN2, DCTN3, DYNC1H1, DYNC1I2, FGFR1OP, HAUS1, HAUS3, HAUS4, HAUS5, HAUS8, NEDD1, PAFAH1B1, PLK1, PLK4, PPP2R1A, TUBB, TUBG1]
R-HSA:8878171	Transcriptional regulation by RUNX1	REACTOME_Pathways_27.02.2019	8.74686e-09	2.42527e-08	0.011152	0.0126727	[-1]	Group75	22.1757	53	[ACTL6A, CCND1, CCNH, CSNK2B, H2AFX, H2AFZ, H3F3A, HIST1H2BC, HIST1H2BJ, HIST1H2BL, HIST2H2AC, HIST2H2BE, HIST2H3D, MNAT1, PRMT1, PSMA1, PSMA2, PSMA3, PSMA4, PSMA5, PSMA6, PSMA7, PSMB1, PSMB2, PSMB3, PSMB4, PSMB5, PSMB6, PSMB7, PSMC1, PSMC2, PSMC3, PSMC4, PSMC5, PSMC6, PSMD11, PSMD12, PSMD13, PSMD14, PSMD2, PSMD3, PSMD4, PSMD6, PSMD7, PSMD8, PSME1, PTPN11, SEM1, SETD1A, SIN3A, SMARCB1, UBC, WDR5]
R-HSA:5357801	Programmed Cell Death	REACTOME_Pathways_27.02.2019	9.50367e-07	2.21422e-06	0.011152	0.0126727	[-1]	Group75	21.8579	40	[ACIN1, CFLAR, CYCS, DNM1L, FNTA, OPA1, PSMA1, PSMA2, PSMA3, PSMA4, PSMA5, PSMA6, PSMA7, PSMB1, PSMB2, PSMB3, PSMB4, PSMB5, PSMB6, PSMB7, PSMC1, PSMC2, PSMC3, PSMC4, PSMC5, PSMC6, PSMD11, PSMD12, PSMD13, PSMD14, PSMD2, PSMD3, PSMD4, PSMD6, PSMD7, PSMD8, PSME1, PTK2, SEM1, UBC]
R-HSA:8953897	Cellular responses to external stimuli	REACTOME_Pathways_27.02.2019	1.46973e-16	7.1463e-16	0.011152	0.0126727	[-1]	Group75	21.8504	111	[ACD, ACTR10, ACTR1A, ANAPC1, ANAPC10, ANAPC11, ANAPC15, ANAPC4, ANAPC5, CAPZB, CCNA2, CDC16, CDC23, CDC26, CHMP2A, CHMP6, CHMP7, CYCS, DCTN2, DCTN3, DCTN4, DCTN5, DCTN6, DYNC1H1, DYNC1I2, EGLN2, ELOB, EP400, H2AFX, H2AFZ, H3F3A, HIST1H2BC, HIST1H2BJ, HIST1H2BL, HIST2H2AC, HIST2H2BE, HIST2H3D, HMGA1, HSF1, HSPA9, LAMTOR2, LAMTOR3, LAMTOR4, MLST8, MTOR, NDC1, NUP133, NUP153, NUP155, NUP160, NUP205…
R-HSA:157118	Signaling by NOTCH	REACTOME_Pathways_27.02.2019	4.23799e-08	1.11517e-07	0.011152	0.0126727	[-1]	Group75	21.7021	51	[ATP2A2, CCND1, CUL1, H2AFX, H2AFZ, H3F3A, HDAC3, HIST1H2BC, HIST1H2BJ, HIST1H2BL, HIST2H2AC, HIST2H2BE, HIST2H3D, MYC, PSMA1, PSMA2, PSMA3, PSMA4, PSMA5, PSMA6, PSMA7, PSMB1, PSMB2, PSMB3, PSMB4, PSMB5, PSMB6, PSMB7, PSMC1, PSMC2, PSMC3, PSMC4, PSMC5, PSMC6, PSMD11, PSMD12, PSMD13, PSMD14, PSMD2, PSMD3, PSMD4, PSMD6, PSMD7, PSMD8, PSME1, RBX1, SEM1, SKP1, SNW1, UBC, YBX1]
R-HSA:5688426	Deubiquitination	REACTOME_Pathways_27.02.2019	1.0314e-09	3.13154e-09	0.011152	0.0126727	[-1]	Group75	21.5488	64	[ACTB, ACTL6A, ACTR8, BAP1, BARD1, BRCA1, CCNA2, CCP110, CDC20, HGS, HIST1H2BC, HIST1H2BJ, HIST1H2BL, HIST2H2AC, HIST2H2BE, INO80, MYC, NEDD8, PSMA1, PSMA2, PSMA3, PSMA4, PSMA5, PSMA6, PSMA7, PSMB1, PSMB2, PSMB3, PSMB4, PSMB5, PSMB6, PSMB7, PSMC1, PSMC2, PSMC3, PSMC4, PSMC5, PSMC6, PSMD11, PSMD12, PSMD13, PSMD14, PSMD2, PSMD3, PSMD4, PSMD6, PSMD7, PSMD8, PSME1, RUVBL1, SEM1, TADA3, TAF10, TOMM20,…
R-HSA:195258	RHO GTPase Effectors	REACTOME_Pathways_27.02.2019	1.2923e-09	3.8885e-09	0.011152	0.0126727	[-1]	Group75	20.7951	68	[ACTB, ACTG1, ACTR2, AHCTF1, ARPC3, AURKB, BIRC5, BUB1B, BUB3, CDC20, CDCA8, CENPA, CENPE, CENPK, CKAP5, DSN1, DYNC1H1, DYNC1I2, GRB2, H2AFX, H2AFZ, H3F3A, HIST1H2BC, HIST1H2BJ, HIST1H2BL, HIST2H2AC, HIST2H2BE, HIST2H3D, INCENP, KIF14, KIF18A, KNL1, MAD2L1, MIS12, NCKAP1, NSL1, NUDC, NUF2, NUP133, NUP160, NUP43, NUP85, NUP98, PAFAH1B1, PDPK1, PFN1, PIK3C3, PIK3R4, PLK1, PMF1, PPP1R12A, PPP2CA, PP…
R-HSA:983168	Antigen processing: Ubiquitination & Proteasome degradation	REACTOME_Pathways_27.02.2019	3.10242e-08	8.2608e-08	0.011152	0.0126727	[-1]	Group75	20.0647	62	[ANAPC1, ANAPC10, ANAPC11, ANAPC4, ANAPC5, CDC16, CDC20, CDC23, CDC26, CUL1, CUL3, ELOB, HECTD1, LRR1, MKRN1, NPEPPS, PSMA1, PSMA2, PSMA3, PSMA4, PSMA5, PSMA6, PSMA7, PSMB1, PSMB2, PSMB3, PSMB4, PSMB5, PSMB6, PSMB7, PSMC1, PSMC2, PSMC3, PSMC4, PSMC5, PSMC6, PSMD11, PSMD12, PSMD13, PSMD14, PSMD2, PSMD3, PSMD4, PSMD6, PSMD7, PSMD8, PSME1, RBBP6, RBX1, RNF14, RNF4, SEM1, SKP1, UBA3, UBA5, UBC, UBE2D…
R-HSA:1257604	PIP3 activates AKT signaling	REACTOME_Pathways_27.02.2019	1.60474e-06	3.66252e-06	0.011152	0.0126727	[-1]	Group75	19.3916	51	[CHD4, CSNK2B, GRB2, HDAC3, LAMTOR2, LAMTOR3, LAMTOR4, MKRN1, MLST8, MTOR, PDPK1, PPP2CA, PPP2R1A, PSMA1, PSMA2, PSMA3, PSMA4, PSMA5, PSMA6, PSMA7, PSMB1, PSMB2, PSMB3, PSMB4, PSMB5, PSMB6, PSMB7, PSMC1, PSMC2, PSMC3, PSMC4, PSMC5, PSMC6, PSMD11, PSMD12, PSMD13, PSMD14, PSMD2, PSMD3, PSMD4, PSMD6, PSMD7, PSMD8, PSME1, PTPN11, RBBP4, RCOR1, RPTOR, SEM1, UBC, USP7]
R-HSA:422475	Axon guidance	REACTOME_Pathways_27.02.2019	1.91702e-11	6.63051e-11	0.011152	0.0126727	[-1]	Group75	18.9873	105	[ACTB, ACTG1, ACTR2, ARPC3, CACNB3, CAP1, CLTC, CSNK2B, DNM2, EIF4A3, EIF4G1, ELOB, ETF1, GRB2, GSPT1, NCBP1, NCBP2, PABPC1, PFN1, PSMA1, PSMA2, PSMA3, PSMA4, PSMA5, PSMA6, PSMA7, PSMB1, PSMB2, PSMB3, PSMB4, PSMB5, PSMB6, PSMB7, PSMC1, PSMC2, PSMC3, PSMC4, PSMC5, PSMC6, PSMD11, PSMD12, PSMD13, PSMD14, PSMD2, PSMD3, PSMD4, PSMD6, PSMD7, PSMD8, PSME1, PTK2, PTPN11, RBM8A, RBX1, RPL10A, RPL12, RPL13…
KEGG:04120	Ubiquitin mediated proteolysis	KEGG_27.02.2019	0.00118211	0.00211519	0.011152	0.0126727	[-1]	Group75	18.9781	26	[ANAPC1, ANAPC10, ANAPC11, ANAPC4, ANAPC5, BRCA1, CDC16, CDC20, CDC23, CDC26, CUL1, CUL3, DDB1, ELOB, PRPF19, RBX1, SAE1, SKP1, UBA2, UBA3, UBE2D3, UBE2I, UBE2M, UBE2N, UBR5, VHL]
R-HSA:5673001	RAF/MAP kinase cascade	REACTOME_Pathways_27.02.2019	5.19314e-05	0.000105275	0.011152	0.0126727	[-1]	Group75	18.0723	45	[ACTB, ACTG1, CUL3, GRB2, LAMTOR2, LAMTOR3, PHB, PPP2CA, PPP2R1A, PSMA1, PSMA2, PSMA3, PSMA4, PSMA5, PSMA6, PSMA7, PSMB1, PSMB2, PSMB3, PSMB4, PSMB5, PSMB6, PSMB7, PSMC1, PSMC2, PSMC3, PSMC4, PSMC5, PSMC6, PSMD11, PSMD12, PSMD13, PSMD14, PSMD2, PSMD3, PSMD4, PSMD6, PSMD7, PSMD8, PSME1, PTK2, RBX1, SEM1, TLN1, UBC]
R-HSA:5684996	MAPK1/MAPK3 signaling	REACTOME_Pathways_27.02.2019	4.10197e-05	8.41719e-05	0.011152	0.0126727	[-1]	Group75	18.0392	46	[ACTB, ACTG1, CUL3, GRB2, LAMTOR2, LAMTOR3, PHB, PPP2CA, PPP2R1A, PSMA1, PSMA2, PSMA3, PSMA4, PSMA5, PSMA6, PSMA7, PSMB1, PSMB2, PSMB3, PSMB4, PSMB5, PSMB6, PSMB7, PSMC1, PSMC2, PSMC3, PSMC4, PSMC5, PSMC6, PSMD11, PSMD12, PSMD13, PSMD14, PSMD2, PSMD3, PSMD4, PSMD6, PSMD7, PSMD8, PSME1, PTK2, PTPN11, RBX1, SEM1, TLN1, UBC]
R-HSA:983169	Class I MHC mediated antigen processing & presentation	REACTOME_Pathways_27.02.2019	2.05945e-06	4.65283e-06	0.011152	0.0126727	[-1]	Group75	17.6471	66	[ANAPC1, ANAPC10, ANAPC11, ANAPC4, ANAPC5, CDC16, CDC20, CDC23, CDC26, CUL1, CUL3, ELOB, HECTD1, LRR1, MKRN1, NPEPPS, PSMA1, PSMA2, PSMA3, PSMA4, PSMA5, PSMA6, PSMA7, PSMB1, PSMB2, PSMB3, PSMB4, PSMB5, PSMB6, PSMB7, PSMC1, PSMC2, PSMC3, PSMC4, PSMC5, PSMC6, PSMD11, PSMD12, PSMD13, PSMD14, PSMD2, PSMD3, PSMD4, PSMD6, PSMD7, PSMD8, PSME1, RBBP6, RBX1, RNF14, RNF4, SEC13, SEC61A1, SEC61B, SEC61G, SE…
R-HSA:195721	Signaling by WNT	REACTOME_Pathways_27.02.2019	8.40992e-06	1.82034e-05	0.011152	0.0126727	[-1]	Group75	17.5758	58	[CDC73, CLTC, CSNK1A1, CSNK2B, CUL1, CUL3, H2AFX, H2AFZ, H3F3A, HIST1H2BC, HIST1H2BJ, HIST1H2BL, HIST2H2AC, HIST2H2BE, HIST2H3D, MYC, PFN1, PPP2CA, PPP2R1A, PSMA1, PSMA2, PSMA3, PSMA4, PSMA5, PSMA6, PSMA7, PSMB1, PSMB2, PSMB3, PSMB4, PSMB5, PSMB6, PSMB7, PSMC1, PSMC2, PSMC3, PSMC4, PSMC5, PSMC6, PSMD11, PSMD12, PSMD13, PSMD14, PSMD2, PSMD3, PSMD4, PSMD6, PSMD7, PSMD8, PSME1, RAC3, RBX1, RUVBL1, S…
R-HSA:1643685	Disease	REACTOME_Pathways_27.02.2019	1.18166e-16	5.91712e-16	0.011152	0.0126727	[-1]	Group75	17.3642	195	[ACTB, ACTG1, ALG1, ALG14, ALG2, ATP6V1H, BANF1, CBLL1, CCDC59, CCNH, CCNK, CDK9, CHMP2A, CHMP5, CHMP6, CHMP7, CLTC, CPSF4, CPSF6, CSNK1A1, CTDP1, CUL1, DHDDS, DOLK, DPAGT1, DPM2, EEF2, ELL, ELOB, ERCC2, ERCC3, FDXR, FEN1, FGFR1OP, GRB2, GRSF1, GTF2A1, GTF2A2, GTF2B, GTF2E1, GTF2E2, GTF2F2, GTF2H1, GTF2H3, GTF2H4, HDAC3, HGS, HMGA1, MLST8, MNAT1, MTOR, MYC, NCBP1, NCBP2, NDC1, NELFA, NELFB, NELFE…
R-HSA:5663202	Diseases of signal transduction	REACTOME_Pathways_27.02.2019	7.51116e-06	1.63636e-05	0.011152	0.0126727	[-1]	Group75	17.0103	66	[ACTB, ACTG1, CPSF6, CSNK1A1, CUL1, FGFR1OP, GRB2, GTF2F2, HDAC3, MLST8, MTOR, MYC, NCBP1, NCBP2, PDPK1, PHB, POLR2A, POLR2C, POLR2E, POLR2F, POLR2G, POLR2H, POLR2K, POLR2L, PPP2CA, PPP2R1A, PSMA1, PSMA2, PSMA3, PSMA4, PSMA5, PSMA6, PSMA7, PSMB1, PSMB2, PSMB3, PSMB4, PSMB5, PSMB6, PSMB7, PSMC1, PSMC2, PSMC3, PSMC4, PSMC5, PSMC6, PSMD11, PSMD12, PSMD13, PSMD14, PSMD2, PSMD3, PSMD4, PSMD6, PSMD7, P…
R-HSA:9006925	Intracellular signaling by second messengers	REACTOME_Pathways_27.02.2019	0.000118647	0.000235538	0.011152	0.0126727	[-1]	Group75	16.7763	51	[CHD4, CSNK2B, GRB2, HDAC3, LAMTOR2, LAMTOR3, LAMTOR4, MKRN1, MLST8, MTOR, PDPK1, PPP2CA, PPP2R1A, PSMA1, PSMA2, PSMA3, PSMA4, PSMA5, PSMA6, PSMA7, PSMB1, PSMB2, PSMB3, PSMB4, PSMB5, PSMB6, PSMB7, PSMC1, PSMC2, PSMC3, PSMC4, PSMC5, PSMC6, PSMD11, PSMD12, PSMD13, PSMD14, PSMD2, PSMD3, PSMD4, PSMD6, PSMD7, PSMD8, PSME1, PTPN11, RBBP4, RCOR1, RPTOR, SEM1, UBC, USP7]
R-HSA:5683057	MAPK family signaling cascades	REACTOME_Pathways_27.02.2019	0.000444086	0.000830033	0.011152	0.0126727	[-1]	Group75	16.3265	48	[ACTB, ACTG1, CUL3, GRB2, LAMTOR2, LAMTOR3, MYC, PHB, PPP2CA, PPP2R1A, PSMA1, PSMA2, PSMA3, PSMA4, PSMA5, PSMA6, PSMA7, PSMB1, PSMB2, PSMB3, PSMB4, PSMB5, PSMB6, PSMB7, PSMC1, PSMC2, PSMC3, PSMC4, PSMC5, PSMC6, PSMD11, PSMD12, PSMD13, PSMD14, PSMD2, PSMD3, PSMD4, PSMD6, PSMD7, PSMD8, PSME1, PTK2, PTPN11, RBX1, SEM1, TLN1, UBC, XPO1]
R-HSA:194315	Signaling by Rho GTPases	REACTOME_Pathways_27.02.2019	0.000140145	0.000274963	0.011152	0.0126727	[-1]	Group75	15.3846	70	[ACTB, ACTG1, ACTR2, AHCTF1, ARPC3, AURKB, BIRC5, BUB1B, BUB3, CDC20, CDCA8, CENPA, CENPE, CENPK, CKAP5, DSN1, DYNC1H1, DYNC1I2, GRB2, H2AFX, H2AFZ, H3F3A, HIST1H2BC, HIST1H2BJ, HIST1H2BL, HIST2H2AC, HIST2H2BE, HIST2H3D, INCENP, KIF14, KIF18A, KNL1, MAD2L1, MIS12, NCKAP1, NSL1, NUDC, NUF2, NUP133, NUP160, NUP43, NUP85, NUP98, PAFAH1B1, PDPK1, PFN1, PIK3C3, PIK3R4, PLK1, PMF1, PPP1R12A, PPP2CA, PP…
R-HSA:597592	Post-translational protein modification	REACTOME_Pathways_27.02.2019	3.45117e-07	8.30012e-07	0.011152	0.0126727	[-1]	Group75	13.7159	196	[ACTB, ACTL6A, ACTR10, ACTR1A, ACTR8, ALG1, ALG14, ALG2, ARCN1, ARF4, AURKB, B4GALT3, BAP1, BARD1, BIRC5, BRCA1, CAPZB, CCNA2, CCP110, CDC20, CDC73, CDCA8, COG1, COG2, COG3, COG4, COG8, COPB2, COPE, COPS2, COPS3, COPS4, COPS5, COPS6, COPS8, COPZ1, CTR9, CUL1, CUL3, DAD1, DCTN2, DCTN3, DCTN4, DCTN5, DCTN6, DDB1, DDOST, DDX5, DHDDS, DHPS, DOHH, DOLK, DPAGT1, DPH6, DPM2, DTL, DYNC1H1, DYNC1I2, EEF2,…
R-HSA:212436	Generic Transcription Pathway	REACTOME_Pathways_27.02.2019	4.0254e-06	8.94386e-06	0.011152	0.0126727	[-1]	Group75	13.7077	166	[ACTL6A, ARID3A, AURKB, BANP, BARD1, BIRC5, BRCA1, CCNA2, CCND1, CCNH, CCNK, CDC7, CDK9, CHD4, CHEK1, CNOT3, COX18, COX5A, COX5B, COX6C, COX7C, CSNK2B, CTDP1, CUL1, CYCS, ELL, ELOB, ERCC2, ERCC3, GTF2F2, GTF2H1, GTF2H3, GTF2H4, H2AFX, H2AFZ, H3F3A, HDAC3, HIST1H2BC, HIST1H2BJ, HIST1H2BL, HIST2H2AC, HIST2H2BE, HIST2H3D, HSPD1, HUS1, LAMTOR2, LAMTOR3, LAMTOR4, LRPPRC, MED10, MED17, MED20, MED26, ME…
R-HSA:1266738	Developmental Biology	REACTOME_Pathways_27.02.2019	0.000103743	0.000206563	0.011152	0.0126727	[-1]	Group75	13.2776	143	[ACTB, ACTG1, ACTR2, ARPC3, CACNB3, CAP1, CLTC, CSNK2B, CTCF, DNM2, EIF4A3, EIF4G1, ELOB, ETF1, GRB2, GSPT1, H2AFX, H2AFZ, H3F3A, HDAC3, HIST1H2BC, HIST1H2BJ, HIST1H2BL, HIST2H2AC, HIST2H2BE, HIST2H3D, KRT8, MED10, MED11, MED17, MED18, MED20, MED21, MED26, MED28, MED29, MED30, MED6, MED7, MED8, MED9, NCBP1, NCBP2, PABPC1, PFN1, POLR2A, POLR2C, POLR2E, POLR2F, POLR2G, POLR2H, POLR2K, POLR2L, PSMA1…
R-HSA:1280218	Adaptive Immune System	REACTOME_Pathways_27.02.2019	0.0232068	0.0359624	0.011152	0.0126727	[-1]	Group75	12.2047	93	[ACTR10, ACTR1A, ANAPC1, ANAPC10, ANAPC11, ANAPC4, ANAPC5, CAPZB, CDC16, CDC20, CDC23, CDC26, CENPE, CLTC, CUL1, CUL3, DCTN2, DCTN3, DCTN4, DCTN5, DCTN6, DNM2, DYNC1H1, DYNC1I2, ELOB, GRB2, HECTD1, KIF11, KIF18A, LRR1, MKRN1, MLST8, MTOR, NFKBIE, NPEPPS, PDPK1, PPIA, PPP2CA, PPP2R1A, PSMA1, PSMA2, PSMA3, PSMA4, PSMA5, PSMA6, PSMA7, PSMB1, PSMB2, PSMB3, PSMB4, PSMB5, PSMB6, PSMB7, PSMC1, PSMC2, PS…
R-HSA:162582	Signal Transduction	REACTOME_Pathways_27.02.2019	1.11217e-09	3.36155e-09	0.011152	0.0126727	[-1]	Group75	6.83161	185	[AATF, ACTB, ACTG1, ACTR2, AHCTF1, ARPC3, ATP2A2, ATP6V0B, ATP6V1A, ATP6V1E1, ATP6V1F, ATP6V1G1, ATP6V1H, AURKB, BIRC5, BUB1B, BUB3, CCND1, CCNK, CDC20, CDC73, CDCA8, CDK9, CENPA, CENPE, CENPK, CFLAR, CHD4, CHEK1, CKAP5, CLTC, CSNK1A1, CSNK2B, CUL1, CUL3, DDX5, DNM2, DSN1, DYNC1H1, DYNC1I2, EIF4G1, FNTA, FNTB, GRB2, GTF2A1, GTF2A2, GTF2F2, H2AFX, H2AFZ, H3F3A, HCRTR1, HDAC3, HGS, HIST1H2BC, HIST1…
R-HSA:1170546	Prolactin receptor signaling	REACTOME_Pathways_27.02.2019	0.0116091	0.018907	0.0116091	0.0129953	[-1]	Group09	33.3333	5	[CUL1, PTPN11, RBX1, SKP1, STAT5A]
R-HSA:3065678	SUMO is transferred from E1 to E2 (UBE2I, UBC9)	REACTOME_Pathways_27.02.2019	0.00251169	0.00437752	0.0118509	0.0130709	[-1]	Group23	57.1429	4	[SAE1, SUMO2, UBA2, UBE2I]
R-HSA:3215018	Processing and activation of SUMO	REACTOME_Pathways_27.02.2019	0.0118509	0.0192076	0.0118509	0.0130709	[-1]	Group23	40	4	[SAE1, SUMO2, UBA2, UBE2I]
R-HSA:8866654	E3 ubiquitin ligases ubiquitinate target proteins	REACTOME_Pathways_27.02.2019	0.0130078	0.0209813	0.0130078	0.0141389	[-1]	Group05	20.339	12	[CDC73, CTR9, HIST1H2BC, HIST1H2BJ, HIST1H2BL, PCNA, RNF20, RTF1, UBC, UBE2D3, UBE2N, VCP]
KEGG:05202	Transcriptional misregulation in cancer	KEGG_27.02.2019	0.0178903	0.0283792	0.0178903	0.0191682	[-1]	Group06	4.83871	9	[CDK9, DDX5, EWSR1, H3F3A, HIST2H3D, MYC, PTK2, SIN3A, ZBTB17]
R-HSA:113510	E2F mediated regulation of DNA replication	REACTOME_Pathways_27.02.2019	0.000752793	0.00138012	0.0208259	0.0219992	[-1]	Group48	36.3636	8	[ORC1, ORC3, ORC4, ORC5, POLA2, PPP2CA, PPP2R1A, PRIM1]
R-HSA:1295596	Spry regulation of FGF signaling	REACTOME_Pathways_27.02.2019	0.01555	0.0250217	0.0208259	0.0219992	[-1]	Group48	31.25	5	[GRB2, PPP2CA, PPP2R1A, PTPN11, UBC]
R-HSA:113501	Inhibition of replication initiation of damaged DNA by RB1/E2F1	REACTOME_Pathways_27.02.2019	0.0318217	0.0475553	0.0208259	0.0219992	[-1]	Group48	30.7692	4	[POLA2, PPP2CA, PPP2R1A, PRIM1]
R-HSA:2995383	Initiation of Nuclear Envelope Reformation	REACTOME_Pathways_27.02.2019	0.0318217	0.0475553	0.0208259	0.0219992	[-1]	Group48	30.7692	4	[ANKLE2, BANF1, PPP2CA, PPP2R1A]
R-HSA:2995410	Nuclear Envelope Reassembly	REACTOME_Pathways_27.02.2019	0.0318217	0.0475553	0.0208259	0.0219992	[-1]	Group48	30.7692	4	[ANKLE2, BANF1, PPP2CA, PPP2R1A]
R-HSA:199418	Negative regulation of the PI3K/AKT network	REACTOME_Pathways_27.02.2019	0.0331393	0.0491957	0.0208259	0.0219992	[-1]	Group48	3.66972	4	[GRB2, PPP2CA, PPP2R1A, PTPN11]
KEGG:04728	Dopaminergic synapse	KEGG_27.02.2019	0.006933	0.0114582	0.0208259	0.0219992	[-1]	Group48	3.05344	4	[ATF4, PPP1CA, PPP2CA, PPP2R1A]
R-HSA:499943	Interconversion of nucleotide di- and triphosphates	REACTOME_Pathways_27.02.2019	0.0231357	0.0359353	0.0231357	0.0240997	[-1]	Group14	23.3333	7	[CMPK1, CTPS1, DTYMK, DUT, GUK1, RRM1, RRM2]
R-HSA:3371511	HSF1 activation	REACTOME_Pathways_27.02.2019	0.023837	0.0367692	0.023837	0.02449	[-1]	Group13	33.3333	4	[HSF1, RPA2, RPA3, VCP]
R-HSA:68949	Orc1 removal from chromatin	REACTOME_Pathways_27.02.2019	2.07899e-33	4.50002e-32	0.0594387	0.0602419	[-1]	Group71	69.0141	49	[CCNA2, CDC6, CDT1, CUL1, MCM2, MCM3, MCM4, MCM5, MCM6, MCM7, ORC1, ORC3, ORC4, ORC5, PSMA1, PSMA2, PSMA3, PSMA4, PSMA5, PSMA6, PSMA7, PSMB1, PSMB2, PSMB3, PSMB4, PSMB5, PSMB6, PSMB7, PSMC1, PSMC2, PSMC3, PSMC4, PSMC5, PSMC6, PSMD11, PSMD12, PSMD13, PSMD14, PSMD2, PSMD3, PSMD4, PSMD6, PSMD7, PSMD8, PSME1, RBX1, SEM1, SKP1, UBC]
R-HSA:174084	Autodegradation of Cdh1 by Cdh1:APC/C	REACTOME_Pathways_27.02.2019	7.53563e-28	9.0293e-27	0.0594387	0.0602419	[-1]	Group71	66.6667	42	[ANAPC1, ANAPC10, ANAPC11, ANAPC15, ANAPC4, ANAPC5, CDC16, CDC23, CDC26, PSMA1, PSMA2, PSMA3, PSMA4, PSMA5, PSMA6, PSMA7, PSMB1, PSMB2, PSMB3, PSMB4, PSMB5, PSMB6, PSMB7, PSMC1, PSMC2, PSMC3, PSMC4, PSMC5, PSMC6, PSMD11, PSMD12, PSMD13, PSMD14, PSMD2, PSMD3, PSMD4, PSMD6, PSMD7, PSMD8, PSME1, SEM1, UBC]
R-HSA:68867	Assembly of the pre-replicative complex	REACTOME_Pathways_27.02.2019	1.52959e-29	2.18373e-28	0.0594387	0.0602419	[-1]	Group71	66.1765	45	[CDC6, CDT1, MCM2, MCM3, MCM4, MCM5, MCM6, MCM7, ORC1, ORC3, ORC4, ORC5, PSMA1, PSMA2, PSMA3, PSMA4, PSMA5, PSMA6, PSMA7, PSMB1, PSMB2, PSMB3, PSMB4, PSMB5, PSMB6, PSMB7, PSMC1, PSMC2, PSMC3, PSMC4, PSMC5, PSMC6, PSMD11, PSMD12, PSMD13, PSMD14, PSMD2, PSMD3, PSMD4, PSMD6, PSMD7, PSMD8, PSME1, SEM1, UBC]
R-HSA:68827	CDT1 association with the CDC6:ORC:origin complex	REACTOME_Pathways_27.02.2019	9.83281e-26	1.03091e-24	0.0594387	0.0602419	[-1]	Group71	66.1017	39	[CDC6, CDT1, ORC1, ORC3, ORC4, ORC5, PSMA1, PSMA2, PSMA3, PSMA4, PSMA5, PSMA6, PSMA7, PSMB1, PSMB2, PSMB3, PSMB4, PSMB5, PSMB6, PSMB7, PSMC1, PSMC2, PSMC3, PSMC4, PSMC5, PSMC6, PSMD11, PSMD12, PSMD13, PSMD14, PSMD2, PSMD3, PSMD4, PSMD6, PSMD7, PSMD8, PSME1, SEM1, UBC]
R-HSA:174113	SCF-beta-TrCP mediated degradation of Emi1	REACTOME_Pathways_27.02.2019	1.26481e-23	1.16258e-22	0.0594387	0.0602419	[-1]	Group71	65.4545	36	[CDC20, CUL1, PSMA1, PSMA2, PSMA3, PSMA4, PSMA5, PSMA6, PSMA7, PSMB1, PSMB2, PSMB3, PSMB4, PSMB5, PSMB6, PSMB7, PSMC1, PSMC2, PSMC3, PSMC4, PSMC5, PSMC6, PSMD11, PSMD12, PSMD13, PSMD14, PSMD2, PSMD3, PSMD4, PSMD6, PSMD7, PSMD8, PSME1, SEM1, SKP1, UBC]
R-HSA:174184	Cdc20:Phospho-APC/C mediated degradation of Cyclin A	REACTOME_Pathways_27.02.2019	2.14191e-30	3.34238e-29	0.0594387	0.0602419	[-1]	Group71	65.2778	47	[ANAPC1, ANAPC10, ANAPC11, ANAPC15, ANAPC4, ANAPC5, BUB1B, BUB3, CCNA2, CDC16, CDC20, CDC23, CDC26, MAD2L1, PSMA1, PSMA2, PSMA3, PSMA4, PSMA5, PSMA6, PSMA7, PSMB1, PSMB2, PSMB3, PSMB4, PSMB5, PSMB6, PSMB7, PSMC1, PSMC2, PSMC3, PSMC4, PSMC5, PSMC6, PSMD11, PSMD12, PSMD13, PSMD14, PSMD2, PSMD3, PSMD4, PSMD6, PSMD7, PSMD8, PSME1, SEM1, UBC]
R-HSA:69052	Switching of origins to a post-replicative state	REACTOME_Pathways_27.02.2019	8.72385e-37	2.43904e-35	0.0594387	0.0602419	[-1]	Group71	64.4444	58	[ANAPC1, ANAPC10, ANAPC11, ANAPC15, ANAPC4, ANAPC5, CCNA2, CDC16, CDC23, CDC26, CDC6, CDT1, CUL1, MCM2, MCM3, MCM4, MCM5, MCM6, MCM7, ORC1, ORC3, ORC4, ORC5, PSMA1, PSMA2, PSMA3, PSMA4, PSMA5, PSMA6, PSMA7, PSMB1, PSMB2, PSMB3, PSMB4, PSMB5, PSMB6, PSMB7, PSMC1, PSMC2, PSMC3, PSMC4, PSMC5, PSMC6, PSMD11, PSMD12, PSMD13, PSMD14, PSMD2, PSMD3, PSMD4, PSMD6, PSMD7, PSMD8, PSME1, RBX1, SEM1, SKP1, UB…
R-HSA:179419	APC:Cdc20 mediated degradation of cell cycle proteins prior to satisfation of the cell cycle checkpoint	REACTOME_Pathways_27.02.2019	5.45791e-30	8.13835e-29	0.0594387	0.0602419	[-1]	Group71	64.3836	47	[ANAPC1, ANAPC10, ANAPC11, ANAPC15, ANAPC4, ANAPC5, BUB1B, BUB3, CCNA2, CDC16, CDC20, CDC23, CDC26, MAD2L1, PSMA1, PSMA2, PSMA3, PSMA4, PSMA5, PSMA6, PSMA7, PSMB1, PSMB2, PSMB3, PSMB4, PSMB5, PSMB6, PSMB7, PSMC1, PSMC2, PSMC3, PSMC4, PSMC5, PSMC6, PSMD11, PSMD12, PSMD13, PSMD14, PSMD2, PSMD3, PSMD4, PSMD6, PSMD7, PSMD8, PSME1, SEM1, UBC]
R-HSA:174154	APC/C:Cdc20 mediated degradation of Securin	REACTOME_Pathways_27.02.2019	1.87972e-27	2.13778e-26	0.0594387	0.0602419	[-1]	Group71	64.1791	43	[ANAPC1, ANAPC10, ANAPC11, ANAPC15, ANAPC4, ANAPC5, CDC16, CDC20, CDC23, CDC26, PSMA1, PSMA2, PSMA3, PSMA4, PSMA5, PSMA6, PSMA7, PSMB1, PSMB2, PSMB3, PSMB4, PSMB5, PSMB6, PSMB7, PSMC1, PSMC2, PSMC3, PSMC4, PSMC5, PSMC6, PSMD11, PSMD12, PSMD13, PSMD14, PSMD2, PSMD3, PSMD4, PSMD6, PSMD7, PSMD8, PSME1, SEM1, UBC]
R-HSA:69601	Ubiquitin Mediated Degradation of Phosphorylated Cdc25A	REACTOME_Pathways_27.02.2019	5.91129e-22	4.66644e-21	0.0594387	0.0602419	[-1]	Group71	64.1509	34	[CHEK1, PSMA1, PSMA2, PSMA3, PSMA4, PSMA5, PSMA6, PSMA7, PSMB1, PSMB2, PSMB3, PSMB4, PSMB5, PSMB6, PSMB7, PSMC1, PSMC2, PSMC3, PSMC4, PSMC5, PSMC6, PSMD11, PSMD12, PSMD13, PSMD14, PSMD2, PSMD3, PSMD4, PSMD6, PSMD7, PSMD8, PSME1, SEM1, UBC]
R-HSA:69610	p53-Independent DNA Damage Response	REACTOME_Pathways_27.02.2019	5.91129e-22	4.66644e-21	0.0594387	0.0602419	[-1]	Group71	64.1509	34	[CHEK1, PSMA1, PSMA2, PSMA3, PSMA4, PSMA5, PSMA6, PSMA7, PSMB1, PSMB2, PSMB3, PSMB4, PSMB5, PSMB6, PSMB7, PSMC1, PSMC2, PSMC3, PSMC4, PSMC5, PSMC6, PSMD11, PSMD12, PSMD13, PSMD14, PSMD2, PSMD3, PSMD4, PSMD6, PSMD7, PSMD8, PSME1, SEM1, UBC]
R-HSA:69613	p53-Independent G1/S DNA damage checkpoint	REACTOME_Pathways_27.02.2019	5.91129e-22	4.66644e-21	0.0594387	0.0602419	[-1]	Group71	64.1509	34	[CHEK1, PSMA1, PSMA2, PSMA3, PSMA4, PSMA5, PSMA6, PSMA7, PSMB1, PSMB2, PSMB3, PSMB4, PSMB5, PSMB6, PSMB7, PSMC1, PSMC2, PSMC3, PSMC4, PSMC5, PSMC6, PSMD11, PSMD12, PSMD13, PSMD14, PSMD2, PSMD3, PSMD4, PSMD6, PSMD7, PSMD8, PSME1, SEM1, UBC]
R-HSA:176814	Activation of APC/C and APC/C:Cdc20 mediated degradation of mitotic proteins	REACTOME_Pathways_27.02.2019	4.93357e-30	7.5237e-29	0.0594387	0.0602419	[-1]	Group71	63.1579	48	[ANAPC1, ANAPC10, ANAPC11, ANAPC15, ANAPC4, ANAPC5, BUB1B, BUB3, CCNA2, CDC16, CDC20, CDC23, CDC26, MAD2L1, PLK1, PSMA1, PSMA2, PSMA3, PSMA4, PSMA5, PSMA6, PSMA7, PSMB1, PSMB2, PSMB3, PSMB4, PSMB5, PSMB6, PSMB7, PSMC1, PSMC2, PSMC3, PSMC4, PSMC5, PSMC6, PSMD11, PSMD12, PSMD13, PSMD14, PSMD2, PSMD3, PSMD4, PSMD6, PSMD7, PSMD8, PSME1, SEM1, UBC]
R-HSA:69239	Synthesis of DNA	REACTOME_Pathways_27.02.2019	2.85617e-46	1.27766e-44	0.0594387	0.0602419	[-1]	Group71	63.0252	75	[ANAPC1, ANAPC10, ANAPC11, ANAPC15, ANAPC4, ANAPC5, CCNA2, CDC16, CDC23, CDC26, CDC45, CDC6, CDT1, CUL1, FEN1, GINS1, GINS2, GINS3, MCM2, MCM3, MCM4, MCM5, MCM6, MCM7, ORC1, ORC3, ORC4, ORC5, PCNA, POLA2, POLD1, POLD2, POLD3, POLE2, PRIM1, PSMA1, PSMA2, PSMA3, PSMA4, PSMA5, PSMA6, PSMA7, PSMB1, PSMB2, PSMB3, PSMB4, PSMB5, PSMB6, PSMB7, PSMC1, PSMC2, PSMC3, PSMC4, PSMC5, PSMC6, PSMD11, PSMD12, PSM…
R-HSA:176409	APC/C:Cdc20 mediated degradation of mitotic proteins	REACTOME_Pathways_27.02.2019	3.30023e-29	4.61345e-28	0.0594387	0.0602419	[-1]	Group71	62.6667	47	[ANAPC1, ANAPC10, ANAPC11, ANAPC15, ANAPC4, ANAPC5, BUB1B, BUB3, CCNA2, CDC16, CDC20, CDC23, CDC26, MAD2L1, PSMA1, PSMA2, PSMA3, PSMA4, PSMA5, PSMA6, PSMA7, PSMB1, PSMB2, PSMB3, PSMB4, PSMB5, PSMB6, PSMB7, PSMC1, PSMC2, PSMC3, PSMC4, PSMC5, PSMC6, PSMD11, PSMD12, PSMD13, PSMD14, PSMD2, PSMD3, PSMD4, PSMD6, PSMD7, PSMD8, PSME1, SEM1, UBC]
R-HSA:176408	Regulation of APC/C activators between G1/S and early anaphase	REACTOME_Pathways_27.02.2019	6.4374e-31	1.13671e-29	0.0594387	0.0602419	[-1]	Group71	62.5	50	[ANAPC1, ANAPC10, ANAPC11, ANAPC15, ANAPC4, ANAPC5, BUB1B, BUB3, CCNA2, CDC16, CDC20, CDC23, CDC26, CUL1, MAD2L1, PLK1, PSMA1, PSMA2, PSMA3, PSMA4, PSMA5, PSMA6, PSMA7, PSMB1, PSMB2, PSMB3, PSMB4, PSMB5, PSMB6, PSMB7, PSMC1, PSMC2, PSMC3, PSMC4, PSMC5, PSMC6, PSMD11, PSMD12, PSMD13, PSMD14, PSMD2, PSMD3, PSMD4, PSMD6, PSMD7, PSMD8, PSME1, SEM1, SKP1, UBC]
R-HSA:174178	APC/C:Cdh1 mediated degradation of Cdc20 and other APC/C:Cdh1 targeted proteins in late mitosis/early G1	REACTOME_Pathways_27.02.2019	6.08168e-28	7.41965e-27	0.0594387	0.0602419	[-1]	Group71	62.5	45	[ANAPC1, ANAPC10, ANAPC11, ANAPC15, ANAPC4, ANAPC5, AURKB, CDC16, CDC20, CDC23, CDC26, PLK1, PSMA1, PSMA2, PSMA3, PSMA4, PSMA5, PSMA6, PSMA7, PSMB1, PSMB2, PSMB3, PSMB4, PSMB5, PSMB6, PSMB7, PSMC1, PSMC2, PSMC3, PSMC4, PSMC5, PSMC6, PSMD11, PSMD12, PSMD13, PSMD14, PSMD2, PSMD3, PSMD4, PSMD6, PSMD7, PSMD8, PSME1, SEM1, UBC]
R-HSA:69002	DNA Replication Pre-Initiation	REACTOME_Pathways_27.02.2019	1.9358e-31	3.51061e-30	0.0594387	0.0602419	[-1]	Group71	61.1765	52	[CDC45, CDC6, CDC7, CDT1, MCM2, MCM3, MCM4, MCM5, MCM6, MCM7, ORC1, ORC3, ORC4, ORC5, POLA2, POLE2, PRIM1, PSMA1, PSMA2, PSMA3, PSMA4, PSMA5, PSMA6, PSMA7, PSMB1, PSMB2, PSMB3, PSMB4, PSMB5, PSMB6, PSMB7, PSMC1, PSMC2, PSMC3, PSMC4, PSMC5, PSMC6, PSMD11, PSMD12, PSMD13, PSMD14, PSMD2, PSMD3, PSMD4, PSMD6, PSMD7, PSMD8, PSME1, RPA2, RPA3, SEM1, UBC]
R-HSA:69017	CDK-mediated phosphorylation and removal of Cdc6	REACTOME_Pathways_27.02.2019	9.37352e-27	1.03109e-25	0.0594387	0.0602419	[-1]	Group71	61.1111	44	[ANAPC1, ANAPC10, ANAPC11, ANAPC15, ANAPC4, ANAPC5, CCNA2, CDC16, CDC23, CDC26, CDC6, PSMA1, PSMA2, PSMA3, PSMA4, PSMA5, PSMA6, PSMA7, PSMB1, PSMB2, PSMB3, PSMB4, PSMB5, PSMB6, PSMB7, PSMC1, PSMC2, PSMC3, PSMC4, PSMC5, PSMC6, PSMD11, PSMD12, PSMD13, PSMD14, PSMD2, PSMD3, PSMD4, PSMD6, PSMD7, PSMD8, PSME1, SEM1, UBC]
R-HSA:69306	DNA Replication	REACTOME_Pathways_27.02.2019	1.64756e-44	6.14175e-43	0.0594387	0.0602419	[-1]	Group71	59.8425	76	[ANAPC1, ANAPC10, ANAPC11, ANAPC15, ANAPC4, ANAPC5, CCNA2, CDC16, CDC23, CDC26, CDC45, CDC6, CDC7, CDT1, CUL1, FEN1, GINS1, GINS2, GINS3, MCM2, MCM3, MCM4, MCM5, MCM6, MCM7, ORC1, ORC3, ORC4, ORC5, PCNA, POLA2, POLD1, POLD2, POLD3, POLE2, PRIM1, PSMA1, PSMA2, PSMA3, PSMA4, PSMA5, PSMA6, PSMA7, PSMB1, PSMB2, PSMB3, PSMB4, PSMB5, PSMB6, PSMB7, PSMC1, PSMC2, PSMC3, PSMC4, PSMC5, PSMC6, PSMD11, PSMD1…
R-HSA:174143	APC/C-mediated degradation of cell cycle proteins	REACTOME_Pathways_27.02.2019	6.36591e-30	9.28593e-29	0.0594387	0.0602419	[-1]	Group71	59.3023	51	[ANAPC1, ANAPC10, ANAPC11, ANAPC15, ANAPC4, ANAPC5, AURKB, BUB1B, BUB3, CCNA2, CDC16, CDC20, CDC23, CDC26, CUL1, MAD2L1, PLK1, PSMA1, PSMA2, PSMA3, PSMA4, PSMA5, PSMA6, PSMA7, PSMB1, PSMB2, PSMB3, PSMB4, PSMB5, PSMB6, PSMB7, PSMC1, PSMC2, PSMC3, PSMC4, PSMC5, PSMC6, PSMD11, PSMD12, PSMD13, PSMD14, PSMD2, PSMD3, PSMD4, PSMD6, PSMD7, PSMD8, PSME1, SEM1, SKP1, UBC]
R-HSA:453276	Regulation of mitotic cell cycle	REACTOME_Pathways_27.02.2019	6.36591e-30	9.28593e-29	0.0594387	0.0602419	[-1]	Group71	59.3023	51	[ANAPC1, ANAPC10, ANAPC11, ANAPC15, ANAPC4, ANAPC5, AURKB, BUB1B, BUB3, CCNA2, CDC16, CDC20, CDC23, CDC26, CUL1, MAD2L1, PLK1, PSMA1, PSMA2, PSMA3, PSMA4, PSMA5, PSMA6, PSMA7, PSMB1, PSMB2, PSMB3, PSMB4, PSMB5, PSMB6, PSMB7, PSMC1, PSMC2, PSMC3, PSMC4, PSMC5, PSMC6, PSMD11, PSMD12, PSMD13, PSMD14, PSMD2, PSMD3, PSMD4, PSMD6, PSMD7, PSMD8, PSME1, SEM1, SKP1, UBC]
R-HSA:69242	S Phase	REACTOME_Pathways_27.02.2019	1.17312e-41	4.14296e-40	0.0594387	0.0602419	[-1]	Group71	51.5528	83	[ANAPC1, ANAPC10, ANAPC11, ANAPC15, ANAPC4, ANAPC5, CCNA2, CCND1, CCNH, CDC16, CDC23, CDC26, CDC45, CDC6, CDT1, CUL1, FEN1, GINS1, GINS2, GINS3, MCM2, MCM3, MCM4, MCM5, MCM6, MCM7, MNAT1, MYC, ORC1, ORC3, ORC4, ORC5, PCNA, POLA2, POLD1, POLD2, POLD3, POLE2, PRIM1, PSMA1, PSMA2, PSMA3, PSMA4, PSMA5, PSMA6, PSMA7, PSMB1, PSMB2, PSMB3, PSMB4, PSMB5, PSMB6, PSMB7, PSMC1, PSMC2, PSMC3, PSMC4, PSMC5, P…
R-HSA:69563	p53-Dependent G1 DNA Damage Response	REACTOME_Pathways_27.02.2019	9.84178e-18	5.45772e-17	0.0594387	0.0602419	[-1]	Group71	51.5152	34	[CCNA2, PSMA1, PSMA2, PSMA3, PSMA4, PSMA5, PSMA6, PSMA7, PSMB1, PSMB2, PSMB3, PSMB4, PSMB5, PSMB6, PSMB7, PSMC1, PSMC2, PSMC3, PSMC4, PSMC5, PSMC6, PSMD11, PSMD12, PSMD13, PSMD14, PSMD2, PSMD3, PSMD4, PSMD6, PSMD7, PSMD8, PSME1, SEM1, UBC]
R-HSA:69580	p53-Dependent G1/S DNA damage checkpoint	REACTOME_Pathways_27.02.2019	9.84178e-18	5.45772e-17	0.0594387	0.0602419	[-1]	Group71	51.5152	34	[CCNA2, PSMA1, PSMA2, PSMA3, PSMA4, PSMA5, PSMA6, PSMA7, PSMB1, PSMB2, PSMB3, PSMB4, PSMB5, PSMB6, PSMB7, PSMC1, PSMC2, PSMC3, PSMC4, PSMC5, PSMC6, PSMD11, PSMD12, PSMD13, PSMD14, PSMD2, PSMD3, PSMD4, PSMD6, PSMD7, PSMD8, PSME1, SEM1, UBC]
R-HSA:69615	G1/S DNA Damage Checkpoints	REACTOME_Pathways_27.02.2019	3.35686e-18	1.99332e-17	0.0594387	0.0602419	[-1]	Group71	51.4706	35	[CCNA2, CHEK1, PSMA1, PSMA2, PSMA3, PSMA4, PSMA5, PSMA6, PSMA7, PSMB1, PSMB2, PSMB3, PSMB4, PSMB5, PSMB6, PSMB7, PSMC1, PSMC2, PSMC3, PSMC4, PSMC5, PSMC6, PSMD11, PSMD12, PSMD13, PSMD14, PSMD2, PSMD3, PSMD4, PSMD6, PSMD7, PSMD8, PSME1, SEM1, UBC]
R-HSA:69206	G1/S Transition	REACTOME_Pathways_27.02.2019	1.61058e-31	3.00194e-30	0.0594387	0.0602419	[-1]	Group71	49.6183	65	[CCNA2, CCND1, CCNH, CDC45, CDC6, CDC7, CDT1, CUL1, MCM2, MCM3, MCM4, MCM5, MCM6, MCM7, MNAT1, MYC, ORC1, ORC3, ORC4, ORC5, PCNA, POLA2, POLE2, PPP2CA, PPP2R1A, PRIM1, PSMA1, PSMA2, PSMA3, PSMA4, PSMA5, PSMA6, PSMA7, PSMB1, PSMB2, PSMB3, PSMB4, PSMB5, PSMB6, PSMB7, PSMC1, PSMC2, PSMC3, PSMC4, PSMC5, PSMC6, PSMD11, PSMD12, PSMD13, PSMD14, PSMD2, PSMD3, PSMD4, PSMD6, PSMD7, PSMD8, PSME1, RBBP4, RPA…
R-HSA:195253	Degradation of beta-catenin by the destruction complex	REACTOME_Pathways_27.02.2019	1.45222e-18	8.77871e-18	0.0594387	0.0602419	[-1]	Group71	47.561	39	[CSNK1A1, CUL1, PPP2CA, PPP2R1A, PSMA1, PSMA2, PSMA3, PSMA4, PSMA5, PSMA6, PSMA7, PSMB1, PSMB2, PSMB3, PSMB4, PSMB5, PSMB6, PSMB7, PSMC1, PSMC2, PSMC3, PSMC4, PSMC5, PSMC6, PSMD11, PSMD12, PSMD13, PSMD14, PSMD2, PSMD3, PSMD4, PSMD6, PSMD7, PSMD8, PSME1, RBX1, SEM1, SKP1, UBC]
R-HSA:8852276	The role of GTSE1 in G2/M progression after G2 checkpoint	REACTOME_Pathways_27.02.2019	6.20201e-17	3.20119e-16	0.0594387	0.0602419	[-1]	Group71	46.7532	36	[PLK1, PSMA1, PSMA2, PSMA3, PSMA4, PSMA5, PSMA6, PSMA7, PSMB1, PSMB2, PSMB3, PSMB4, PSMB5, PSMB6, PSMB7, PSMC1, PSMC2, PSMC3, PSMC4, PSMC5, PSMC6, PSMD11, PSMD12, PSMD13, PSMD14, PSMD2, PSMD3, PSMD4, PSMD6, PSMD7, PSMD8, PSME1, SEM1, TUBA1C, TUBB8, UBC]
R-HSA:2467813	Separation of Sister Chromatids	REACTOME_Pathways_27.02.2019	2.5062e-39	8.40831e-38	0.0594387	0.0602419	[-1]	Group71	46.3158	88	[AHCTF1, ANAPC1, ANAPC10, ANAPC11, ANAPC15, ANAPC4, ANAPC5, AURKB, BIRC5, BUB1B, BUB3, CDC16, CDC20, CDC23, CDC26, CDCA8, CENPA, CENPE, CENPK, CKAP5, DSN1, DYNC1H1, DYNC1I2, ESPL1, INCENP, KIF18A, KNL1, MAD2L1, MIS12, NSL1, NUDC, NUF2, NUP133, NUP160, NUP43, NUP85, NUP98, PAFAH1B1, PLK1, PMF1, PPP2CA, PPP2R1A, PSMA1, PSMA2, PSMA3, PSMA4, PSMA5, PSMA6, PSMA7, PSMB1, PSMB2, PSMB3, PSMB4, PSMB5, PSM…
R-HSA:162909	Host Interactions of HIV factors	REACTOME_Pathways_27.02.2019	1.01813e-27	1.17787e-26	0.0594387	0.0602419	[-1]	Group71	45.9259	62	[ATP6V1H, BANF1, CDK9, ELOB, HMGA1, NDC1, NPM1, NUP133, NUP153, NUP155, NUP160, NUP205, NUP214, NUP35, NUP43, NUP62, NUP85, NUP88, NUP98, PPIA, PSMA1, PSMA2, PSMA3, PSMA4, PSMA5, PSMA6, PSMA7, PSMB1, PSMB2, PSMB3, PSMB4, PSMB5, PSMB6, PSMB7, PSMC1, PSMC2, PSMC3, PSMC4, PSMC5, PSMC6, PSMD11, PSMD12, PSMD13, PSMD14, PSMD2, PSMD3, PSMD4, PSMD6, PSMD7, PSMD8, PSME1, RAE1, RANGAP1, RBX1, RCC1, SEC13, …
R-HSA:68882	Mitotic Anaphase	REACTOME_Pathways_27.02.2019	1.00036e-38	3.1964e-37	0.0594387	0.0602419	[-1]	Group71	44.7761	90	[AHCTF1, ANAPC1, ANAPC10, ANAPC11, ANAPC15, ANAPC4, ANAPC5, ANKLE2, AURKB, BANF1, BIRC5, BUB1B, BUB3, CDC16, CDC20, CDC23, CDC26, CDCA8, CENPA, CENPE, CENPK, CKAP5, DSN1, DYNC1H1, DYNC1I2, ESPL1, INCENP, KIF18A, KNL1, MAD2L1, MIS12, NSL1, NUDC, NUF2, NUP133, NUP160, NUP43, NUP85, NUP98, PAFAH1B1, PLK1, PMF1, PPP2CA, PPP2R1A, PSMA1, PSMA2, PSMA3, PSMA4, PSMA5, PSMA6, PSMA7, PSMB1, PSMB2, PSMB3, PS…
R-HSA:69618	Mitotic Spindle Checkpoint	REACTOME_Pathways_27.02.2019	6.724e-22	5.12705e-21	0.0594387	0.0602419	[-1]	Group71	44.6429	50	[AHCTF1, ANAPC1, ANAPC10, ANAPC11, ANAPC15, ANAPC4, ANAPC5, AURKB, BIRC5, BUB1B, BUB3, CDC16, CDC20, CDC23, CDC26, CDCA8, CENPA, CENPE, CENPK, CKAP5, DSN1, DYNC1H1, DYNC1I2, INCENP, KIF18A, KNL1, MAD2L1, MIS12, NSL1, NUDC, NUF2, NUP133, NUP160, NUP43, NUP85, NUP98, PAFAH1B1, PLK1, PMF1, PPP2CA, PPP2R1A, RANGAP1, SEC13, SEH1L, SGO1, SKA1, SPC24, SPC25, SPDL1, XPO1]
R-HSA:2555396	Mitotic Metaphase and Anaphase	REACTOME_Pathways_27.02.2019	1.64056e-38	5.00371e-37	0.0594387	0.0602419	[-1]	Group71	44.5545	90	[AHCTF1, ANAPC1, ANAPC10, ANAPC11, ANAPC15, ANAPC4, ANAPC5, ANKLE2, AURKB, BANF1, BIRC5, BUB1B, BUB3, CDC16, CDC20, CDC23, CDC26, CDCA8, CENPA, CENPE, CENPK, CKAP5, DSN1, DYNC1H1, DYNC1I2, ESPL1, INCENP, KIF18A, KNL1, MAD2L1, MIS12, NSL1, NUDC, NUF2, NUP133, NUP160, NUP43, NUP85, NUP98, PAFAH1B1, PLK1, PMF1, PPP2CA, PPP2R1A, PSMA1, PSMA2, PSMA3, PSMA4, PSMA5, PSMA6, PSMA7, PSMB1, PSMB2, PSMB3, PS…
R-HSA:453279	Mitotic G1-G1/S phases	REACTOME_Pathways_27.02.2019	2.74421e-28	3.47427e-27	0.0594387	0.0602419	[-1]	Group71	44.2953	66	[CCNA2, CCND1, CCNH, CDC45, CDC6, CDC7, CDT1, CUL1, MCM2, MCM3, MCM4, MCM5, MCM6, MCM7, MNAT1, MYC, ORC1, ORC3, ORC4, ORC5, PCNA, POLA2, POLE2, PPP2CA, PPP2R1A, PRIM1, PSMA1, PSMA2, PSMA3, PSMA4, PSMA5, PSMA6, PSMA7, PSMB1, PSMB2, PSMB3, PSMB4, PSMB5, PSMB6, PSMB7, PSMC1, PSMC2, PSMC3, PSMC4, PSMC5, PSMC6, PSMD11, PSMD12, PSMD13, PSMD14, PSMD2, PSMD3, PSMD4, PSMD6, PSMD7, PSMD8, PSME1, RBBP4, RPA…
R-HSA:141424	Amplification of signal from the kinetochores	REACTOME_Pathways_27.02.2019	2.46921e-17	1.31495e-16	0.0594387	0.0602419	[-1]	Group71	42.7083	41	[AHCTF1, AURKB, BIRC5, BUB1B, BUB3, CDC20, CDCA8, CENPA, CENPE, CENPK, CKAP5, DSN1, DYNC1H1, DYNC1I2, INCENP, KIF18A, KNL1, MAD2L1, MIS12, NSL1, NUDC, NUF2, NUP133, NUP160, NUP43, NUP85, NUP98, PAFAH1B1, PLK1, PMF1, PPP2CA, PPP2R1A, RANGAP1, SEC13, SEH1L, SGO1, SKA1, SPC24, SPC25, SPDL1, XPO1]
R-HSA:141444	Amplification of signal from unattached kinetochores via a MAD2 inhibitory signal	REACTOME_Pathways_27.02.2019	2.46921e-17	1.31495e-16	0.0594387	0.0602419	[-1]	Group71	42.7083	41	[AHCTF1, AURKB, BIRC5, BUB1B, BUB3, CDC20, CDCA8, CENPA, CENPE, CENPK, CKAP5, DSN1, DYNC1H1, DYNC1I2, INCENP, KIF18A, KNL1, MAD2L1, MIS12, NSL1, NUDC, NUF2, NUP133, NUP160, NUP43, NUP85, NUP98, PAFAH1B1, PLK1, PMF1, PPP2CA, PPP2R1A, RANGAP1, SEC13, SEH1L, SGO1, SKA1, SPC24, SPC25, SPDL1, XPO1]
R-HSA:69481	G2/M Checkpoints	REACTOME_Pathways_27.02.2019	8.72419e-29	1.17079e-27	0.0594387	0.0602419	[-1]	Group71	42.2619	71	[BARD1, BRCA1, CDC45, CDC6, CDC7, CHEK1, H2AFX, HIST1H2BC, HIST1H2BJ, HIST1H2BL, HIST2H2BE, HUS1, MCM2, MCM3, MCM4, MCM5, MCM6, MCM7, ORC1, ORC3, ORC4, ORC5, PKMYT1, PSMA1, PSMA2, PSMA3, PSMA4, PSMA5, PSMA6, PSMA7, PSMB1, PSMB2, PSMB3, PSMB4, PSMB5, PSMB6, PSMB7, PSMC1, PSMC2, PSMC3, PSMC4, PSMC5, PSMC6, PSMD11, PSMD12, PSMD13, PSMD14, PSMD2, PSMD3, PSMD4, PSMD6, PSMD7, PSMD8, PSME1, RAD17, RAD9A…
R-HSA:69620	Cell Cycle Checkpoints	REACTOME_Pathways_27.02.2019	3.19238e-48	1.53006e-46	0.0594387	0.0602419	[-1]	Group71	41.6382	122	[AHCTF1, ANAPC1, ANAPC10, ANAPC11, ANAPC15, ANAPC4, ANAPC5, AURKB, BARD1, BIRC5, BRCA1, BUB1B, BUB3, CCNA2, CDC16, CDC20, CDC23, CDC26, CDC45, CDC6, CDC7, CDCA8, CENPA, CENPE, CENPK, CHEK1, CKAP5, DSN1, DYNC1H1, DYNC1I2, H2AFX, HIST1H2BC, HIST1H2BJ, HIST1H2BL, HIST2H2BE, HUS1, INCENP, KIF18A, KNL1, MAD2L1, MCM2, MCM3, MCM4, MCM5, MCM6, MCM7, MIS12, NSL1, NUDC, NUF2, NUP133, NUP160, NUP43, NUP85, …
R-HSA:5687128	MAPK6/MAPK4 signaling	REACTOME_Pathways_27.02.2019	1.09302e-13	4.28898e-13	0.0594387	0.0602419	[-1]	Group71	39.3258	35	[MYC, PSMA1, PSMA2, PSMA3, PSMA4, PSMA5, PSMA6, PSMA7, PSMB1, PSMB2, PSMB3, PSMB4, PSMB5, PSMB6, PSMB7, PSMC1, PSMC2, PSMC3, PSMC4, PSMC5, PSMC6, PSMD11, PSMD12, PSMD13, PSMD14, PSMD2, PSMD3, PSMD4, PSMD6, PSMD7, PSMD8, PSME1, SEM1, UBC, XPO1]
R-HSA:2500257	Resolution of Sister Chromatid Cohesion	REACTOME_Pathways_27.02.2019	2.33434e-15	1.03049e-14	0.0594387	0.0602419	[-1]	Group71	35.7143	45	[AHCTF1, AURKB, BIRC5, BUB1B, BUB3, CDC20, CDCA8, CENPA, CENPE, CENPK, CKAP5, DSN1, DYNC1H1, DYNC1I2, INCENP, KIF18A, KNL1, MAD2L1, MIS12, NSL1, NUDC, NUF2, NUP133, NUP160, NUP43, NUP85, NUP98, PAFAH1B1, PLK1, PMF1, PPP2CA, PPP2R1A, RAD21, RANGAP1, SEC13, SEH1L, SGO1, SKA1, SMC3, SPC24, SPC25, SPDL1, TUBA1C, TUBB8, XPO1]
R-HSA:68886	M Phase	REACTOME_Pathways_27.02.2019	1.1236e-44	4.43492e-43	0.0594387	0.0602419	[-1]	Group71	35.1899	139	[ACTR1A, AHCTF1, ANAPC1, ANAPC10, ANAPC11, ANAPC15, ANAPC4, ANAPC5, ANKLE2, AURKB, BANF1, BIRC5, BUB1B, BUB3, CCP110, CDC16, CDC20, CDC23, CDC26, CDCA8, CENPA, CENPE, CENPK, CEP192, CKAP5, CSNK2B, DCTN2, DCTN3, DSN1, DYNC1H1, DYNC1I2, ESPL1, FGFR1OP, H2AFX, H2AFZ, H3F3A, HAUS1, HAUS3, HAUS4, HAUS5, HAUS8, HIST1H2BC, HIST1H2BJ, HIST1H2BL, HIST2H2AC, HIST2H2BE, HIST2H3D, INCENP, KIF18A, KNL1, MAD2L…
R-HSA:69278	Cell Cycle, Mitotic	REACTOME_Pathways_27.02.2019	7.17418e-59	5.34875e-57	0.0594387	0.0602419	[-1]	Group71	34.5725	186	[ACTR1A, AHCTF1, ANAPC1, ANAPC10, ANAPC11, ANAPC15, ANAPC4, ANAPC5, ANKLE2, AURKB, BANF1, BIRC5, BUB1B, BUB3, CCNA2, CCND1, CCNH, CCP110, CDC16, CDC20, CDC23, CDC26, CDC45, CDC6, CDC7, CDCA8, CDK11A, CDT1, CENPA, CENPE, CENPK, CEP192, CKAP5, CSNK2B, CUL1, DCTN2, DCTN3, DSN1, DYNC1H1, DYNC1I2, ESPL1, FEN1, FGFR1OP, GINS1, GINS2, GINS3, H2AFX, H2AFZ, H3F3A, HAUS1, HAUS3, HAUS4, HAUS5, HAUS8, HIST1H…
R-HSA:8939236	RUNX1 regulates transcription of genes involved in differentiation of HSCs	REACTOME_Pathways_27.02.2019	4.4501e-14	1.80971e-13	0.0594387	0.0602419	[-1]	Group71	33.8462	44	[CCNH, H2AFX, H2AFZ, H3F3A, HIST1H2BC, HIST1H2BJ, HIST1H2BL, HIST2H2AC, HIST2H2BE, HIST2H3D, MNAT1, PSMA1, PSMA2, PSMA3, PSMA4, PSMA5, PSMA6, PSMA7, PSMB1, PSMB2, PSMB3, PSMB4, PSMB5, PSMB6, PSMB7, PSMC1, PSMC2, PSMC3, PSMC4, PSMC5, PSMC6, PSMD11, PSMD12, PSMD13, PSMD14, PSMD2, PSMD3, PSMD4, PSMD6, PSMD7, PSMD8, PSME1, SEM1, UBC]
R-HSA:5663220	RHO GTPases Activate Formins	REACTOME_Pathways_27.02.2019	8.57009e-15	3.63958e-14	0.0594387	0.0602419	[-1]	Group71	33.5714	47	[ACTB, ACTG1, AHCTF1, AURKB, BIRC5, BUB1B, BUB3, CDC20, CDCA8, CENPA, CENPE, CENPK, CKAP5, DSN1, DYNC1H1, DYNC1I2, INCENP, KIF18A, KNL1, MAD2L1, MIS12, NSL1, NUDC, NUF2, NUP133, NUP160, NUP43, NUP85, NUP98, PAFAH1B1, PFN1, PLK1, PMF1, PPP2CA, PPP2R1A, RANGAP1, SEC13, SEH1L, SGO1, SKA1, SPC24, SPC25, SPDL1, SRF, TUBA1C, TUBB8, XPO1]
R-HSA:1640170	Cell Cycle	REACTOME_Pathways_27.02.2019	8.12975e-65	9.09177e-63	0.0594387	0.0602419	[-1]	Group71	33.2815	214	[ACD, ACTR1A, AHCTF1, ANAPC1, ANAPC10, ANAPC11, ANAPC15, ANAPC4, ANAPC5, ANKLE2, AURKB, BANF1, BARD1, BIRC5, BRCA1, BRCA2, BUB1B, BUB3, CCNA2, CCND1, CCNH, CCP110, CDC16, CDC20, CDC23, CDC26, CDC45, CDC6, CDC7, CDCA8, CDK11A, CDT1, CENPA, CENPE, CENPK, CENPW, CEP192, CHEK1, CKAP5, CSNK2B, CUL1, DCTN2, DCTN3, DSN1, DYNC1H1, DYNC1I2, ESPL1, FEN1, FGFR1OP, GINS1, GINS2, GINS3, H2AFX, H2AFZ, H3F3A, H…
R-HSA:5689880	Ub-specific processing proteases	REACTOME_Pathways_27.02.2019	1.16626e-10	3.79885e-10	0.0594387	0.0602419	[-1]	Group71	24.5455	54	[CCNA2, CCP110, CDC20, HGS, HIST1H2BC, HIST1H2BJ, HIST1H2BL, HIST2H2AC, HIST2H2BE, MYC, PSMA1, PSMA2, PSMA3, PSMA4, PSMA5, PSMA6, PSMA7, PSMB1, PSMB2, PSMB3, PSMB4, PSMB5, PSMB6, PSMB7, PSMC1, PSMC2, PSMC3, PSMC4, PSMC5, PSMC6, PSMD11, PSMD12, PSMD13, PSMD14, PSMD2, PSMD3, PSMD4, PSMD6, PSMD7, PSMD8, PSME1, RUVBL1, SEM1, TADA3, TAF10, TOMM20, TRRAP, UBC, UFD1, USP10, USP37, USP7, VDAC1, WDR48]
R-HSA:2262752	Cellular responses to stress	REACTOME_Pathways_27.02.2019	3.25478e-18	1.94996e-17	0.0594387	0.0602419	[-1]	Group71	23.8979	103	[ACD, ACTR10, ACTR1A, ANAPC1, ANAPC10, ANAPC11, ANAPC15, ANAPC4, ANAPC5, CAPZB, CCNA2, CDC16, CDC23, CDC26, CYCS, DCTN2, DCTN3, DCTN4, DCTN5, DCTN6, DYNC1H1, DYNC1I2, EGLN2, ELOB, EP400, H2AFX, H2AFZ, H3F3A, HIST1H2BC, HIST1H2BJ, HIST1H2BL, HIST2H2AC, HIST2H2BE, HIST2H3D, HMGA1, HSF1, HSPA9, MLST8, MTOR, NDC1, NUP133, NUP153, NUP155, NUP160, NUP205, NUP214, NUP35, NUP43, NUP62, NUP85, NUP88, NUP9…
R-HSA:201681	TCF dependent signaling in response to WNT	REACTOME_Pathways_27.02.2019	4.03287e-09	1.15643e-08	0.0594387	0.0602419	[-1]	Group71	22.7468	53	[CDC73, CSNK1A1, CSNK2B, CUL3, H2AFX, H2AFZ, H3F3A, HIST1H2BC, HIST1H2BJ, HIST1H2BL, HIST2H2AC, HIST2H2BE, HIST2H3D, MYC, PPP2CA, PPP2R1A, PSMA1, PSMA2, PSMA3, PSMA4, PSMA5, PSMA6, PSMA7, PSMB1, PSMB2, PSMB3, PSMB4, PSMB5, PSMB6, PSMB7, PSMC1, PSMC2, PSMC3, PSMC4, PSMC5, PSMC6, PSMD11, PSMD12, PSMD13, PSMD14, PSMD2, PSMD3, PSMD4, PSMD6, PSMD7, PSMD8, PSME1, RBX1, RUVBL1, SEM1, TRRAP, UBC, XPO1]
R-HSA:8953897	Cellular responses to external stimuli	REACTOME_Pathways_27.02.2019	1.46973e-16	7.1463e-16	0.0594387	0.0602419	[-1]	Group71	21.8504	111	[ACD, ACTR10, ACTR1A, ANAPC1, ANAPC10, ANAPC11, ANAPC15, ANAPC4, ANAPC5, CAPZB, CCNA2, CDC16, CDC23, CDC26, CHMP2A, CHMP6, CHMP7, CYCS, DCTN2, DCTN3, DCTN4, DCTN5, DCTN6, DYNC1H1, DYNC1I2, EGLN2, ELOB, EP400, H2AFX, H2AFZ, H3F3A, HIST1H2BC, HIST1H2BJ, HIST1H2BL, HIST2H2AC, HIST2H2BE, HIST2H3D, HMGA1, HSF1, HSPA9, LAMTOR2, LAMTOR3, LAMTOR4, MLST8, MTOR, NDC1, NUP133, NUP153, NUP155, NUP160, NUP205…
R-HSA:157118	Signaling by NOTCH	REACTOME_Pathways_27.02.2019	4.23799e-08	1.11517e-07	0.0594387	0.0602419	[-1]	Group71	21.7021	51	[ATP2A2, CCND1, CUL1, H2AFX, H2AFZ, H3F3A, HDAC3, HIST1H2BC, HIST1H2BJ, HIST1H2BL, HIST2H2AC, HIST2H2BE, HIST2H3D, MYC, PSMA1, PSMA2, PSMA3, PSMA4, PSMA5, PSMA6, PSMA7, PSMB1, PSMB2, PSMB3, PSMB4, PSMB5, PSMB6, PSMB7, PSMC1, PSMC2, PSMC3, PSMC4, PSMC5, PSMC6, PSMD11, PSMD12, PSMD13, PSMD14, PSMD2, PSMD3, PSMD4, PSMD6, PSMD7, PSMD8, PSME1, RBX1, SEM1, SKP1, SNW1, UBC, YBX1]
R-HSA:195258	RHO GTPase Effectors	REACTOME_Pathways_27.02.2019	1.2923e-09	3.8885e-09	0.0594387	0.0602419	[-1]	Group71	20.7951	68	[ACTB, ACTG1, ACTR2, AHCTF1, ARPC3, AURKB, BIRC5, BUB1B, BUB3, CDC20, CDCA8, CENPA, CENPE, CENPK, CKAP5, DSN1, DYNC1H1, DYNC1I2, GRB2, H2AFX, H2AFZ, H3F3A, HIST1H2BC, HIST1H2BJ, HIST1H2BL, HIST2H2AC, HIST2H2BE, HIST2H3D, INCENP, KIF14, KIF18A, KNL1, MAD2L1, MIS12, NCKAP1, NSL1, NUDC, NUF2, NUP133, NUP160, NUP43, NUP85, NUP98, PAFAH1B1, PDPK1, PFN1, PIK3C3, PIK3R4, PLK1, PMF1, PPP1R12A, PPP2CA, PP…
R-HSA:983168	Antigen processing: Ubiquitination & Proteasome degradation	REACTOME_Pathways_27.02.2019	3.10242e-08	8.2608e-08	0.0594387	0.0602419	[-1]	Group71	20.0647	62	[ANAPC1, ANAPC10, ANAPC11, ANAPC4, ANAPC5, CDC16, CDC20, CDC23, CDC26, CUL1, CUL3, ELOB, HECTD1, LRR1, MKRN1, NPEPPS, PSMA1, PSMA2, PSMA3, PSMA4, PSMA5, PSMA6, PSMA7, PSMB1, PSMB2, PSMB3, PSMB4, PSMB5, PSMB6, PSMB7, PSMC1, PSMC2, PSMC3, PSMC4, PSMC5, PSMC6, PSMD11, PSMD12, PSMD13, PSMD14, PSMD2, PSMD3, PSMD4, PSMD6, PSMD7, PSMD8, PSME1, RBBP6, RBX1, RNF14, RNF4, SEM1, SKP1, UBA3, UBA5, UBC, UBE2D…
R-HSA:983169	Class I MHC mediated antigen processing & presentation	REACTOME_Pathways_27.02.2019	2.05945e-06	4.65283e-06	0.0594387	0.0602419	[-1]	Group71	17.6471	66	[ANAPC1, ANAPC10, ANAPC11, ANAPC4, ANAPC5, CDC16, CDC20, CDC23, CDC26, CUL1, CUL3, ELOB, HECTD1, LRR1, MKRN1, NPEPPS, PSMA1, PSMA2, PSMA3, PSMA4, PSMA5, PSMA6, PSMA7, PSMB1, PSMB2, PSMB3, PSMB4, PSMB5, PSMB6, PSMB7, PSMC1, PSMC2, PSMC3, PSMC4, PSMC5, PSMC6, PSMD11, PSMD12, PSMD13, PSMD14, PSMD2, PSMD3, PSMD4, PSMD6, PSMD7, PSMD8, PSME1, RBBP6, RBX1, RNF14, RNF4, SEC13, SEC61A1, SEC61B, SEC61G, SE…
R-HSA:195721	Signaling by WNT	REACTOME_Pathways_27.02.2019	8.40992e-06	1.82034e-05	0.0594387	0.0602419	[-1]	Group71	17.5758	58	[CDC73, CLTC, CSNK1A1, CSNK2B, CUL1, CUL3, H2AFX, H2AFZ, H3F3A, HIST1H2BC, HIST1H2BJ, HIST1H2BL, HIST2H2AC, HIST2H2BE, HIST2H3D, MYC, PFN1, PPP2CA, PPP2R1A, PSMA1, PSMA2, PSMA3, PSMA4, PSMA5, PSMA6, PSMA7, PSMB1, PSMB2, PSMB3, PSMB4, PSMB5, PSMB6, PSMB7, PSMC1, PSMC2, PSMC3, PSMC4, PSMC5, PSMC6, PSMD11, PSMD12, PSMD13, PSMD14, PSMD2, PSMD3, PSMD4, PSMD6, PSMD7, PSMD8, PSME1, RAC3, RBX1, RUVBL1, S…
R-HSA:194315	Signaling by Rho GTPases	REACTOME_Pathways_27.02.2019	0.000140145	0.000274963	0.0594387	0.0602419	[-1]	Group71	15.3846	70	[ACTB, ACTG1, ACTR2, AHCTF1, ARPC3, AURKB, BIRC5, BUB1B, BUB3, CDC20, CDCA8, CENPA, CENPE, CENPK, CKAP5, DSN1, DYNC1H1, DYNC1I2, GRB2, H2AFX, H2AFZ, H3F3A, HIST1H2BC, HIST1H2BJ, HIST1H2BL, HIST2H2AC, HIST2H2BE, HIST2H3D, INCENP, KIF14, KIF18A, KNL1, MAD2L1, MIS12, NCKAP1, NSL1, NUDC, NUF2, NUP133, NUP160, NUP43, NUP85, NUP98, PAFAH1B1, PDPK1, PFN1, PIK3C3, PIK3R4, PLK1, PMF1, PPP1R12A, PPP2CA, PP…
R-HSA:1280218	Adaptive Immune System	REACTOME_Pathways_27.02.2019	0.0232068	0.0359624	0.0594387	0.0602419	[-1]	Group71	12.2047	93	[ACTR10, ACTR1A, ANAPC1, ANAPC10, ANAPC11, ANAPC4, ANAPC5, CAPZB, CDC16, CDC20, CDC23, CDC26, CENPE, CLTC, CUL1, CUL3, DCTN2, DCTN3, DCTN4, DCTN5, DCTN6, DNM2, DYNC1H1, DYNC1I2, ELOB, GRB2, HECTD1, KIF11, KIF18A, LRR1, MKRN1, MLST8, MTOR, NFKBIE, NPEPPS, PDPK1, PPIA, PPP2CA, PPP2R1A, PSMA1, PSMA2, PSMA3, PSMA4, PSMA5, PSMA6, PSMA7, PSMB1, PSMB2, PSMB3, PSMB4, PSMB5, PSMB6, PSMB7, PSMC1, PSMC2, PS…
R-HSA:162582	Signal Transduction	REACTOME_Pathways_27.02.2019	1.11217e-09	3.36155e-09	0.0594387	0.0602419	[-1]	Group71	6.83161	185	[AATF, ACTB, ACTG1, ACTR2, AHCTF1, ARPC3, ATP2A2, ATP6V0B, ATP6V1A, ATP6V1E1, ATP6V1F, ATP6V1G1, ATP6V1H, AURKB, BIRC5, BUB1B, BUB3, CCND1, CCNK, CDC20, CDC73, CDCA8, CDK9, CENPA, CENPE, CENPK, CFLAR, CHD4, CHEK1, CKAP5, CLTC, CSNK1A1, CSNK2B, CUL1, CUL3, DDX5, DNM2, DSN1, DYNC1H1, DYNC1I2, EIF4G1, FNTA, FNTB, GRB2, GTF2A1, GTF2A2, GTF2F2, H2AFX, H2AFZ, H3F3A, HCRTR1, HDAC3, HGS, HIST1H2BC, HIST1…
R-HSA:917977	Transferrin endocytosis and recycling	REACTOME_Pathways_27.02.2019	0.0274366	0.0418408	0.258133	0.258133	[-1]	Group35	22.5806	7	[ATP6V0B, ATP6V1A, ATP6V1E1, ATP6V1F, ATP6V1G1, ATP6V1H, TFRC]
KEGG:05110	Vibrio cholerae infection	KEGG_27.02.2019	0.00790019	0.0129927	0.258133	0.258133	[-1]	Group35	22	11	[ACTB, ACTG1, ATP6V0B, ATP6V1A, ATP6V1E1, ATP6V1F, ATP6V1G1, ATP6V1H, SEC61A1, SEC61B, SEC61G]
R-HSA:917937	Iron uptake and transport	REACTOME_Pathways_27.02.2019	0.0259872	0.0397207	0.258133	0.258133	[-1]	Group35	18.9655	11	[ATP6V0B, ATP6V1A, ATP6V1E1, ATP6V1F, ATP6V1G1, ATP6V1H, CUL1, NEDD8, SKP1, TFRC, UBC]
KEGG:05165	Human papillomavirus infection	KEGG_27.02.2019	0.0307197	0.0461139	0.258133	0.258133	[-1]	Group35	6.36364	21	[ATP6V0B, ATP6V1A, ATP6V1E1, ATP6V1F, ATP6V1G1, ATP6V1H, CCNA2, CCND1, CHD4, CSNK1A1, GRB2, MTOR, PKM, PPP2CA, PPP2R1A, PSMC1, PTK2, TADA3, TBP, TUBG1, UBR4]

## Sheet: Small cell lung cancer
GOID	GOTerm	Ontology Source	Term PValue	Term PValue Corrected with Benjamini-Hochberg	Group PValue	Group PValue Corrected with Benjamini-Hochberg	GOLevels	GOGroups	% Associated Genes	Nr. Genes	Associated Genes Found
KEGG:03040	Spliceosome	KEGG_27.02.2019	1.51073e-39	3.95417e-38	2.23645e-175	1.52078e-173	[-1]	Group42	52.9851	71	[ACIN1, BUD31, CRNKL1, DDX23, DDX46, DDX5, DHX15, DHX16, DHX8, EFTUD2, EIF4A3, HNRNPC, HNRNPK, HNRNPU, ISY1, LSM2, LSM5, LSM6, LSM7, MAGOH, NCBP1, NCBP2, PHF5A, PLRG1, PPIL1, PRPF19, PRPF31, PRPF38A, PRPF38B, PRPF4, PRPF6, PRPF8, PUF60, RBM17, RBM22, RBM25, RBM8A, SART1, SF3A2, SF3A3, SF3B2, SF3B3, SF3B4, SF3B5, SLU7, SMNDC1, SNRNP200, SNRNP27, SNRNP40, SNRNP70, SNRPA, SNRPA1, SNRPD1, SNRPD2, SNR…
R-HSA:72163	mRNA Splicing - Major Pathway	REACTOME_Pathways_27.02.2019	2.39692e-58	1.44294e-56	2.23645e-175	1.52078e-173	[-1]	Group42	55.1913	101	[BUD31, CCAR1, CLP1, CPSF1, CPSF2, CPSF3, CPSF4, CRNKL1, CSTF1, CSTF3, DDX23, DDX46, DDX5, DHX15, DHX16, DHX9, DNAJC8, EFTUD2, EIF4A3, GTF2F2, HNRNPC, HNRNPH1, HNRNPK, HNRNPL, HNRNPR, HNRNPU, ISY1, LSM2, LSM5, LSM6, LSM7, MAGOH, MTREX, NCBP1, NCBP2, NUDT21, PABPN1, PCBP2, PCF11, PHF5A, PLRG1, POLR2A, POLR2C, POLR2E, POLR2F, POLR2G, POLR2H, POLR2K, POLR2L, PPIL1, PPIL4, PPWD1, PRPF19, PRPF31, PRPF…
R-HSA:72165	mRNA Splicing - Minor Pathway	REACTOME_Pathways_27.02.2019	2.2486e-26	2.21911e-25	2.23645e-175	1.52078e-173	[-1]	Group42	69.2308	36	[DDX23, EFTUD2, GTF2F2, LSM2, NCBP1, NCBP2, POLR2A, POLR2C, POLR2E, POLR2F, POLR2G, POLR2H, POLR2K, POLR2L, PRPF6, PRPF8, RNPC3, SF3B2, SF3B3, SF3B4, SF3B5, SNRNP200, SNRNP25, SNRNP35, SNRNP40, SNRPD1, SNRPD2, SNRPD3, SNRPF, SNU13, SRSF1, SRSF2, TXNL4A, YBX1, ZCRB1, ZMAT5]
R-HSA:72172	mRNA Splicing	REACTOME_Pathways_27.02.2019	1.42291e-61	1.07074e-59	2.23645e-175	1.52078e-173	[-1]	Group42	55.4974	106	[BUD31, CCAR1, CLP1, CPSF1, CPSF2, CPSF3, CPSF4, CRNKL1, CSTF1, CSTF3, DDX23, DDX46, DDX5, DHX15, DHX16, DHX9, DNAJC8, EFTUD2, EIF4A3, GTF2F2, HNRNPC, HNRNPH1, HNRNPK, HNRNPL, HNRNPR, HNRNPU, ISY1, LSM2, LSM5, LSM6, LSM7, MAGOH, MTREX, NCBP1, NCBP2, NUDT21, PABPN1, PCBP2, PCF11, PHF5A, PLRG1, POLR2A, POLR2C, POLR2E, POLR2F, POLR2G, POLR2H, POLR2K, POLR2L, PPIL1, PPIL4, PPWD1, PRPF19, PRPF31, PRPF…
R-HSA:72202	Transport of Mature Transcript to Cytoplasm	REACTOME_Pathways_27.02.2019	1.48575e-19	8.20568e-19	2.23645e-175	1.52078e-173	[-1]	Group42	46.4286	39	[CPSF1, CPSF2, CPSF3, CPSF4, EIF4A3, GLE1, MAGOH, NCBP1, NCBP2, NDC1, NUP133, NUP153, NUP155, NUP160, NUP205, NUP214, NUP43, NUP85, NUP88, NUP98, NXF1, RAE1, RBM8A, SEC13, SEH1L, SLU7, SRRM1, SRSF1, SRSF2, SRSF3, SYMPK, THOC1, THOC3, THOC7, TPR, U2AF1, U2AF2, WDR33, ZC3H11A]
R-HSA:72203	Processing of Capped Intron-Containing Pre-mRNA	REACTOME_Pathways_27.02.2019	1.37343e-71	2.75601e-69	2.23645e-175	1.52078e-173	[-1]	Group42	52.8689	129	[BUD31, CCAR1, CLP1, CPSF1, CPSF2, CPSF3, CPSF4, CRNKL1, CSTF1, CSTF3, DDX23, DDX46, DDX5, DHX15, DHX16, DHX9, DNAJC8, EFTUD2, EIF4A3, GLE1, GTF2F2, HNRNPC, HNRNPH1, HNRNPK, HNRNPL, HNRNPR, HNRNPU, ISY1, LSM2, LSM5, LSM6, LSM7, MAGOH, METTL14, METTL3, MTREX, NCBP1, NCBP2, NDC1, NUDT21, NUP133, NUP153, NUP155, NUP160, NUP205, NUP214, NUP43, NUP85, NUP88, NUP98, NXF1, PABPN1, PCBP2, PCF11, PHF5A, P…
R-HSA:8953854	Metabolism of RNA	REACTOME_Pathways_27.02.2019	7.53508e-175	4.53612e-172	2.23645e-175	1.52078e-173	[-1]	Group42	48.3013	327	[BMS1, BOP1, BUD23, BUD31, BYSL, C1D, CCAR1, CCNH, CLNS1A, CLP1, CNOT3, CPSF1, CPSF2, CPSF3, CPSF4, CRNKL1, CSTF1, CSTF3, CTU2, DDX1, DDX20, DDX21, DDX23, DDX46, DDX47, DDX49, DDX5, DDX6, DHX15, DHX16, DHX37, DHX9, DIMT1, DIS3, DNAJC8, EBNA1BP2, EDC4, EFTUD2, EIF4A3, ELAC2, ERCC2, ERCC3, ETF1, EXOSC1, EXOSC10, EXOSC2, EXOSC3, EXOSC4, EXOSC5, EXOSC6, EXOSC7, EXOSC8, FTSJ3, GAR1, GEMIN4, GEMIN5, GE…
KEGG:03008	Ribosome biogenesis in eukaryotes	KEGG_27.02.2019	5.58287e-18	2.68871e-17	8.38815e-173	2.85197e-171	[-1]	Group41	40	42	[BMS1, CSNK2B, EIF6, GAR1, GNL2, GNL3, GTPBP4, HEATR1, IMP4, MDN1, MPHOSPH10, NAT10, NHP2, NMD3, NOB1, NOL6, NOP10, NOP56, NOP58, NVL, NXF1, POP1, POP4, POP7, RBM28, RCL1, RIOK2, RPP40, RRP7A, SBDS, SNU13, SPATA5, TBL3, TCOF1, UTP15, UTP4, WDR3, WDR43, WDR75, XPO1, XRN1, XRN2]
R-HSA:6790901	rRNA modification in the nucleus and cytosol	REACTOME_Pathways_27.02.2019	2.53293e-25	2.27586e-24	8.38815e-173	2.85197e-171	[-1]	Group41	60.9375	39	[BMS1, BUD23, DDX47, DDX49, DHX37, DIMT1, GAR1, HEATR1, IMP4, KRR1, MPHOSPH10, NAT10, NHP2, NOL6, NOP10, NOP14, NOP2, NOP56, NOP58, PDCD11, PNO1, RCL1, RPS14, RPS6, RPS7, RRP7A, RRP9, SNU13, TBL3, TRMT112, UTP11, UTP15, UTP20, UTP3, UTP4, WDR3, WDR43, WDR46, WDR75]
R-HSA:6791226	Major pathway of rRNA processing in the nucleolus and cytosol	REACTOME_Pathways_27.02.2019	3.28575e-65	2.82575e-63	8.38815e-173	2.85197e-171	[-1]	Group41	57.754	108	[BMS1, BOP1, BUD23, BYSL, C1D, DDX21, DDX47, DDX49, DHX37, DIS3, EBNA1BP2, EXOSC1, EXOSC10, EXOSC2, EXOSC3, EXOSC4, EXOSC5, EXOSC6, EXOSC7, EXOSC8, FTSJ3, GNL3, HEATR1, IMP4, ISG20L2, KRR1, LTV1, MPHOSPH10, MTREX, NCL, NIP7, NOB1, NOL12, NOL6, NOL9, NOP14, NOP56, NOP58, PDCD11, PNO1, RBM28, RCL1, RIOK2, RPL10A, RPL12, RPL13, RPL13A, RPL14, RPL15, RPL18A, RPL19, RPL23, RPL24, RPL26, RPL27A, RPL28,…
R-HSA:72203	Processing of Capped Intron-Containing Pre-mRNA	REACTOME_Pathways_27.02.2019	1.37343e-71	2.75601e-69	8.38815e-173	2.85197e-171	[-1]	Group41	52.8689	129	[BUD31, CCAR1, CLP1, CPSF1, CPSF2, CPSF3, CPSF4, CRNKL1, CSTF1, CSTF3, DDX23, DDX46, DDX5, DHX15, DHX16, DHX9, DNAJC8, EFTUD2, EIF4A3, GLE1, GTF2F2, HNRNPC, HNRNPH1, HNRNPK, HNRNPL, HNRNPR, HNRNPU, ISY1, LSM2, LSM5, LSM6, LSM7, MAGOH, METTL14, METTL3, MTREX, NCBP1, NCBP2, NDC1, NUDT21, NUP133, NUP153, NUP155, NUP160, NUP205, NUP214, NUP43, NUP85, NUP88, NUP98, NXF1, PABPN1, PCBP2, PCF11, PHF5A, P…
R-HSA:72312	rRNA processing	REACTOME_Pathways_27.02.2019	2.10003e-70	3.16055e-68	8.38815e-173	2.85197e-171	[-1]	Group41	57.0048	118	[BMS1, BOP1, BUD23, BYSL, C1D, DDX21, DDX47, DDX49, DHX37, DIMT1, DIS3, EBNA1BP2, ELAC2, EXOSC1, EXOSC10, EXOSC2, EXOSC3, EXOSC4, EXOSC5, EXOSC6, EXOSC7, EXOSC8, FTSJ3, GAR1, GNL3, HEATR1, IMP4, ISG20L2, KRR1, LTV1, MPHOSPH10, MRM2, MTREX, NAT10, NCL, NHP2, NIP7, NOB1, NOL12, NOL6, NOL9, NOP10, NOP14, NOP2, NOP56, NOP58, NSUN4, PDCD11, PNO1, RBM28, RCL1, RIOK2, RPL10A, RPL12, RPL13, RPL13A, RPL14…
R-HSA:8868773	rRNA processing in the nucleus and cytosol	REACTOME_Pathways_27.02.2019	3.45355e-70	4.15808e-68	8.38815e-173	2.85197e-171	[-1]	Group41	58.3756	115	[BMS1, BOP1, BUD23, BYSL, C1D, DDX21, DDX47, DDX49, DHX37, DIMT1, DIS3, EBNA1BP2, EXOSC1, EXOSC10, EXOSC2, EXOSC3, EXOSC4, EXOSC5, EXOSC6, EXOSC7, EXOSC8, FTSJ3, GAR1, GNL3, HEATR1, IMP4, ISG20L2, KRR1, LTV1, MPHOSPH10, MTREX, NAT10, NCL, NHP2, NIP7, NOB1, NOL12, NOL6, NOL9, NOP10, NOP14, NOP2, NOP56, NOP58, PDCD11, PNO1, RBM28, RCL1, RIOK2, RPL10A, RPL12, RPL13, RPL13A, RPL14, RPL15, RPL18A, RPL…
R-HSA:8953854	Metabolism of RNA	REACTOME_Pathways_27.02.2019	7.53508e-175	4.53612e-172	8.38815e-173	2.85197e-171	[-1]	Group41	48.3013	327	[BMS1, BOP1, BUD23, BUD31, BYSL, C1D, CCAR1, CCNH, CLNS1A, CLP1, CNOT3, CPSF1, CPSF2, CPSF3, CPSF4, CRNKL1, CSTF1, CSTF3, CTU2, DDX1, DDX20, DDX21, DDX23, DDX46, DDX47, DDX49, DDX5, DDX6, DHX15, DHX16, DHX37, DHX9, DIMT1, DIS3, DNAJC8, EBNA1BP2, EDC4, EFTUD2, EIF4A3, ELAC2, ERCC2, ERCC3, ETF1, EXOSC1, EXOSC10, EXOSC2, EXOSC3, EXOSC4, EXOSC5, EXOSC6, EXOSC7, EXOSC8, FTSJ3, GAR1, GEMIN4, GEMIN5, GE…
KEGG:03013	RNA transport	KEGG_27.02.2019	5.14421e-32	8.60226e-31	1.4534e-115	3.29437e-114	[-1]	Group65	43.0303	71	[ACIN1, CLNS1A, DDX20, EIF1, EIF2B1, EIF2B2, EIF2B3, EIF2B4, EIF2B5, EIF2S1, EIF2S2, EIF3A, EIF3B, EIF3D, EIF3E, EIF3F, EIF3H, EIF3I, EIF4A3, EIF4G2, EIF5, ELAC2, GEMIN4, GEMIN5, GEMIN6, GEMIN7, MAGOH, NCBP1, NCBP2, NDC1, NMD3, NUP133, NUP153, NUP155, NUP160, NUP205, NUP214, NUP43, NUP85, NUP88, NUP98, NXF1, PHAX, POP1, POP4, POP7, PRMT5, PYM1, RAE1, RANGAP1, RBM8A, RPP14, RPP21, RPP40, SAP18, SE…
R-HSA:109688	Cleavage of Growing Transcript in the Termination Region	REACTOME_Pathways_27.02.2019	9.26284e-16	3.81933e-15	1.4534e-115	3.29437e-114	[-1]	Group65	46.2687	31	[CLP1, CPSF1, CPSF2, CPSF3, CPSF4, CSTF1, CSTF3, EIF4A3, LSM11, MAGOH, NCBP1, NCBP2, NUDT21, PABPN1, PCF11, RBM8A, SLU7, SNRPD3, SNRPF, SRRM1, SRSF1, SRSF2, SRSF3, SYMPK, THOC1, THOC3, THOC7, U2AF1, U2AF2, WDR33, ZC3H11A]
R-HSA:1169408	ISG15 antiviral mechanism	REACTOME_Pathways_27.02.2019	3.62292e-06	7.41835e-06	1.4534e-115	3.29437e-114	[-1]	Group65	27.3973	20	[ARIH1, EIF4A3, EIF4G2, NDC1, NUP133, NUP153, NUP155, NUP160, NUP205, NUP214, NUP43, NUP85, NUP88, NUP98, RAE1, SEC13, SEH1L, TPR, UBC, UBE2N]
R-HSA:1169410	Antiviral mechanism by IFN-stimulated genes	REACTOME_Pathways_27.02.2019	5.44372e-06	1.09603e-05	1.4534e-115	3.29437e-114	[-1]	Group65	25.9259	21	[ABCE1, ARIH1, EIF4A3, EIF4G2, NDC1, NUP133, NUP153, NUP155, NUP160, NUP205, NUP214, NUP43, NUP85, NUP88, NUP98, RAE1, SEC13, SEH1L, TPR, UBC, UBE2N]
R-HSA:1226099	Signaling by FGFR in disease	REACTOME_Pathways_27.02.2019	0.00320175	0.00513987	1.4534e-115	3.29437e-114	[-1]	Group65	20.6349	13	[CPSF6, GTF2F2, NCBP1, NCBP2, POLR2A, POLR2C, POLR2E, POLR2F, POLR2G, POLR2H, POLR2K, POLR2L, STAT5A]
R-HSA:159227	Transport of the SLBP independent Mature mRNA	REACTOME_Pathways_27.02.2019	5.97682e-11	1.85466e-10	1.4534e-115	3.29437e-114	[-1]	Group65	52.9412	18	[NCBP1, NCBP2, NDC1, NUP133, NUP153, NUP155, NUP160, NUP205, NUP214, NUP43, NUP85, NUP88, NUP98, NXF1, RAE1, SEC13, SEH1L, TPR]
R-HSA:159230	Transport of the SLBP Dependant Mature mRNA	REACTOME_Pathways_27.02.2019	1.12865e-10	3.44897e-10	1.4534e-115	3.29437e-114	[-1]	Group65	51.4286	18	[NCBP1, NCBP2, NDC1, NUP133, NUP153, NUP155, NUP160, NUP205, NUP214, NUP43, NUP85, NUP88, NUP98, NXF1, RAE1, SEC13, SEH1L, TPR]
R-HSA:159231	Transport of Mature mRNA Derived from an Intronless Transcript	REACTOME_Pathways_27.02.2019	1.66453e-15	6.7706e-15	1.4534e-115	3.29437e-114	[-1]	Group65	58.5366	24	[CPSF1, CPSF2, CPSF3, CPSF4, NCBP1, NCBP2, NDC1, NUP133, NUP153, NUP155, NUP160, NUP205, NUP214, NUP43, NUP85, NUP88, NUP98, NXF1, RAE1, SEC13, SEH1L, SYMPK, TPR, WDR33]
R-HSA:159234	Transport of Mature mRNAs Derived from Intronless Transcripts	REACTOME_Pathways_27.02.2019	3.55923e-15	1.40964e-14	1.4534e-115	3.29437e-114	[-1]	Group65	57.1429	24	[CPSF1, CPSF2, CPSF3, CPSF4, NCBP1, NCBP2, NDC1, NUP133, NUP153, NUP155, NUP160, NUP205, NUP214, NUP43, NUP85, NUP88, NUP98, NXF1, RAE1, SEC13, SEH1L, SYMPK, TPR, WDR33]
R-HSA:159236	Transport of Mature mRNA derived from an Intron-Containing Transcript	REACTOME_Pathways_27.02.2019	6.99606e-16	2.94519e-15	1.4534e-115	3.29437e-114	[-1]	Group65	44	33	[EIF4A3, GLE1, MAGOH, NCBP1, NCBP2, NDC1, NUP133, NUP153, NUP155, NUP160, NUP205, NUP214, NUP43, NUP85, NUP88, NUP98, NXF1, RAE1, RBM8A, SEC13, SEH1L, SLU7, SRRM1, SRSF1, SRSF2, SRSF3, THOC1, THOC3, THOC7, TPR, U2AF1, U2AF2, ZC3H11A]
R-HSA:162587	HIV Life Cycle	REACTOME_Pathways_27.02.2019	3.082e-34	6.87172e-33	1.4534e-115	3.29437e-114	[-1]	Group65	45.283	72	[BANF1, CCNH, CCNK, CDK9, CHMP2A, CHMP5, CHMP6, CHMP7, CTDP1, ELL, ELOB, ERCC2, ERCC3, FEN1, GTF2A1, GTF2A2, GTF2B, GTF2E1, GTF2E2, GTF2F2, GTF2H1, GTF2H3, GTF2H4, HMGA1, MNAT1, NCBP1, NCBP2, NDC1, NELFA, NELFB, NELFE, NUP133, NUP153, NUP155, NUP160, NUP205, NUP214, NUP43, NUP85, NUP88, NUP98, POLR2A, POLR2C, POLR2E, POLR2F, POLR2G, POLR2H, POLR2K, POLR2L, PPIA, RAE1, RANGAP1, RCC1, RNGTT, RNMT, …
R-HSA:162599	Late Phase of HIV Life Cycle	REACTOME_Pathways_27.02.2019	2.3043e-32	4.07997e-31	1.4534e-115	3.29437e-114	[-1]	Group65	45.8904	67	[CCNH, CCNK, CDK9, CHMP2A, CHMP5, CHMP6, CHMP7, CTDP1, ELL, ELOB, ERCC2, ERCC3, GTF2A1, GTF2A2, GTF2B, GTF2E1, GTF2E2, GTF2F2, GTF2H1, GTF2H3, GTF2H4, MNAT1, NCBP1, NCBP2, NDC1, NELFA, NELFB, NELFE, NUP133, NUP153, NUP155, NUP160, NUP205, NUP214, NUP43, NUP85, NUP88, NUP98, POLR2A, POLR2C, POLR2E, POLR2F, POLR2G, POLR2H, POLR2K, POLR2L, PPIA, RAE1, RANGAP1, RCC1, RNGTT, RNMT, SEC13, SEH1L, SSRP1,…
R-HSA:162909	Host Interactions of HIV factors	REACTOME_Pathways_27.02.2019	3.82322e-28	4.18468e-27	1.4534e-115	3.29437e-114	[-1]	Group65	44.4444	60	[ATP6V1H, BANF1, CDK9, ELOB, HMGA1, NDC1, NPM1, NUP133, NUP153, NUP155, NUP160, NUP205, NUP214, NUP43, NUP85, NUP88, NUP98, PPIA, PSMA1, PSMA2, PSMA3, PSMA4, PSMA5, PSMA6, PSMA7, PSMB1, PSMB2, PSMB3, PSMB4, PSMB5, PSMB6, PSMB7, PSMC1, PSMC2, PSMC3, PSMC4, PSMC5, PSMC6, PSMD11, PSMD12, PSMD13, PSMD14, PSMD2, PSMD3, PSMD4, PSMD6, PSMD7, PSMD8, PSME1, RAE1, RANGAP1, RBX1, RCC1, SEC13, SEH1L, SEM1, S…
R-HSA:165054	Rev-mediated nuclear export of HIV RNA	REACTOME_Pathways_27.02.2019	1.12865e-10	3.44897e-10	1.4534e-115	3.29437e-114	[-1]	Group65	51.4286	18	[NDC1, NUP133, NUP153, NUP155, NUP160, NUP205, NUP214, NUP43, NUP85, NUP88, NUP98, RAE1, RANGAP1, RCC1, SEC13, SEH1L, TPR, XPO1]
R-HSA:167160	RNA Pol II CTD phosphorylation and interaction with CE during HIV infection	REACTOME_Pathways_27.02.2019	1.0527e-14	3.96078e-14	1.4534e-115	3.29437e-114	[-1]	Group65	70.3704	19	[CCNH, ERCC2, ERCC3, GTF2F2, GTF2H1, GTF2H3, GTF2H4, MNAT1, POLR2A, POLR2C, POLR2E, POLR2F, POLR2G, POLR2H, POLR2K, POLR2L, RNGTT, RNMT, SUPT5H]
R-HSA:167238	Pausing and recovery of Tat-mediated HIV elongation	REACTOME_Pathways_27.02.2019	9.62138e-12	3.04846e-11	1.4534e-115	3.29437e-114	[-1]	Group65	54.2857	19	[CDK9, CTDP1, ELL, ELOB, GTF2F2, NELFA, NELFB, NELFE, POLR2A, POLR2C, POLR2E, POLR2F, POLR2G, POLR2H, POLR2K, POLR2L, SSRP1, SUPT16H, SUPT5H]
R-HSA:167242	Abortive elongation of HIV-1 transcript in the absence of Tat	REACTOME_Pathways_27.02.2019	1.88596e-12	6.20408e-12	1.4534e-115	3.29437e-114	[-1]	Group65	69.5652	16	[CTDP1, GTF2F2, NCBP1, NCBP2, NELFA, NELFB, NELFE, POLR2A, POLR2C, POLR2E, POLR2F, POLR2G, POLR2H, POLR2K, POLR2L, SUPT5H]
R-HSA:167243	Tat-mediated HIV elongation arrest and recovery	REACTOME_Pathways_27.02.2019	9.62138e-12	3.04846e-11	1.4534e-115	3.29437e-114	[-1]	Group65	54.2857	19	[CDK9, CTDP1, ELL, ELOB, GTF2F2, NELFA, NELFB, NELFE, POLR2A, POLR2C, POLR2E, POLR2F, POLR2G, POLR2H, POLR2K, POLR2L, SSRP1, SUPT16H, SUPT5H]
R-HSA:168253	Host Interactions with Influenza Factors	REACTOME_Pathways_27.02.2019	1.21846e-07	2.84308e-07	1.4534e-115	3.29437e-114	[-1]	Group65	37.7778	17	[CPSF4, NDC1, NUP133, NUP153, NUP155, NUP160, NUP205, NUP214, NUP43, NUP85, NUP88, NUP98, PABPN1, RAE1, SEC13, SEH1L, TPR]
R-HSA:168254	Influenza Infection	REACTOME_Pathways_27.02.2019	9.96799e-33	1.8184e-31	1.4534e-115	3.29437e-114	[-1]	Group65	43.3735	72	[CLTC, CPSF4, GTF2F2, NDC1, NUP133, NUP153, NUP155, NUP160, NUP205, NUP214, NUP43, NUP85, NUP88, NUP98, PABPN1, POLR2A, POLR2C, POLR2E, POLR2F, POLR2G, POLR2H, POLR2K, POLR2L, RAE1, RPL10A, RPL12, RPL13, RPL13A, RPL14, RPL15, RPL18A, RPL19, RPL23, RPL24, RPL26, RPL27A, RPL28, RPL29, RPL3, RPL31, RPL35, RPL36, RPL36AL, RPL37, RPL37A, RPL38, RPL4, RPL7, RPL9, RPLP0, RPLP1, RPS11, RPS12, RPS13, RPS1…
R-HSA:168255	Influenza Life Cycle	REACTOME_Pathways_27.02.2019	3.2247e-33	6.26215e-32	1.4534e-115	3.29437e-114	[-1]	Group65	45.1613	70	[CLTC, GTF2F2, NDC1, NUP133, NUP153, NUP155, NUP160, NUP205, NUP214, NUP43, NUP85, NUP88, NUP98, POLR2A, POLR2C, POLR2E, POLR2F, POLR2G, POLR2H, POLR2K, POLR2L, RAE1, RPL10A, RPL12, RPL13, RPL13A, RPL14, RPL15, RPL18A, RPL19, RPL23, RPL24, RPL26, RPL27A, RPL28, RPL29, RPL3, RPL31, RPL35, RPL36, RPL36AL, RPL37, RPL37A, RPL38, RPL4, RPL7, RPL9, RPLP0, RPLP1, RPS11, RPS12, RPS13, RPS14, RPS15A, RPS1…
R-HSA:168271	Transport of Ribonucleoproteins into the Host Nucleus	REACTOME_Pathways_27.02.2019	9.35725e-08	2.21774e-07	1.4534e-115	3.29437e-114	[-1]	Group65	42.8571	15	[NDC1, NUP133, NUP153, NUP155, NUP160, NUP205, NUP214, NUP43, NUP85, NUP88, NUP98, RAE1, SEC13, SEH1L, TPR]
R-HSA:168273	Influenza Viral RNA Transcription and Replication	REACTOME_Pathways_27.02.2019	1.43304e-33	2.9748e-32	1.4534e-115	3.29437e-114	[-1]	Group65	46.8966	68	[GTF2F2, NDC1, NUP133, NUP153, NUP155, NUP160, NUP205, NUP214, NUP43, NUP85, NUP88, NUP98, POLR2A, POLR2C, POLR2E, POLR2F, POLR2G, POLR2H, POLR2K, POLR2L, RAE1, RPL10A, RPL12, RPL13, RPL13A, RPL14, RPL15, RPL18A, RPL19, RPL23, RPL24, RPL26, RPL27A, RPL28, RPL29, RPL3, RPL31, RPL35, RPL36, RPL36AL, RPL37, RPL37A, RPL38, RPL4, RPL7, RPL9, RPLP0, RPLP1, RPS11, RPS12, RPS13, RPS14, RPS15A, RPS16, RPS…
R-HSA:168274	Export of Viral Ribonucleoproteins from Nucleus	REACTOME_Pathways_27.02.2019	7.33683e-08	1.75269e-07	1.4534e-115	3.29437e-114	[-1]	Group65	41.0256	16	[NDC1, NUP133, NUP153, NUP155, NUP160, NUP205, NUP214, NUP43, NUP85, NUP88, NUP98, RAE1, SEC13, SEH1L, TPR, XPO1]
R-HSA:168276	NS1 Mediated Effects on Host Pathways	REACTOME_Pathways_27.02.2019	2.36146e-08	5.92332e-08	1.4534e-115	3.29437e-114	[-1]	Group65	41.4634	17	[CPSF4, NDC1, NUP133, NUP153, NUP155, NUP160, NUP205, NUP214, NUP43, NUP85, NUP88, NUP98, PABPN1, RAE1, SEC13, SEH1L, TPR]
R-HSA:168325	Viral Messenger RNA Synthesis	REACTOME_Pathways_27.02.2019	1.04876e-13	3.67067e-13	1.4534e-115	3.29437e-114	[-1]	Group65	51.0638	24	[GTF2F2, NDC1, NUP133, NUP153, NUP155, NUP160, NUP205, NUP214, NUP43, NUP85, NUP88, NUP98, POLR2A, POLR2C, POLR2E, POLR2F, POLR2G, POLR2H, POLR2K, POLR2L, RAE1, SEC13, SEH1L, TPR]
R-HSA:168333	NEP/NS2 Interacts with the Cellular Export Machinery	REACTOME_Pathways_27.02.2019	2.97363e-08	7.33657e-08	1.4534e-115	3.29437e-114	[-1]	Group65	43.2432	16	[NDC1, NUP133, NUP153, NUP155, NUP160, NUP205, NUP214, NUP43, NUP85, NUP88, NUP98, RAE1, SEC13, SEH1L, TPR, XPO1]
R-HSA:170822	Regulation of Glucokinase by Glucokinase Regulatory Protein	REACTOME_Pathways_27.02.2019	1.21895e-08	3.13593e-08	1.4534e-115	3.29437e-114	[-1]	Group65	48.3871	15	[NDC1, NUP133, NUP153, NUP155, NUP160, NUP205, NUP214, NUP43, NUP85, NUP88, NUP98, RAE1, SEC13, SEH1L, TPR]
R-HSA:176033	Interactions of Vpr with host cellular proteins	REACTOME_Pathways_27.02.2019	1.50648e-08	3.8428e-08	1.4534e-115	3.29437e-114	[-1]	Group65	42.5	17	[BANF1, HMGA1, NDC1, NUP133, NUP153, NUP155, NUP160, NUP205, NUP214, NUP43, NUP85, NUP88, NUP98, RAE1, SEC13, SEH1L, TPR]
R-HSA:177243	Interactions of Rev with host cellular proteins	REACTOME_Pathways_27.02.2019	3.52195e-11	1.09856e-10	1.4534e-115	3.29437e-114	[-1]	Group65	51.3514	19	[NDC1, NPM1, NUP133, NUP153, NUP155, NUP160, NUP205, NUP214, NUP43, NUP85, NUP88, NUP98, RAE1, RANGAP1, RCC1, SEC13, SEH1L, TPR, XPO1]
R-HSA:180746	Nuclear import of Rev protein	REACTOME_Pathways_27.02.2019	6.64127e-10	1.93142e-09	1.4534e-115	3.29437e-114	[-1]	Group65	50	17	[NDC1, NPM1, NUP133, NUP153, NUP155, NUP160, NUP205, NUP214, NUP43, NUP85, NUP88, NUP98, RAE1, RCC1, SEC13, SEH1L, TPR]
R-HSA:180910	Vpr-mediated nuclear import of PICs	REACTOME_Pathways_27.02.2019	3.49584e-09	9.5226e-09	1.4534e-115	3.29437e-114	[-1]	Group65	45.9459	17	[BANF1, HMGA1, NDC1, NUP133, NUP153, NUP155, NUP160, NUP205, NUP214, NUP43, NUP85, NUP88, NUP98, RAE1, SEC13, SEH1L, TPR]
R-HSA:1839126	FGFR2 mutant receptor activation	REACTOME_Pathways_27.02.2019	8.15236e-05	0.000151473	1.4534e-115	3.29437e-114	[-1]	Group65	33.3333	11	[GTF2F2, NCBP1, NCBP2, POLR2A, POLR2C, POLR2E, POLR2F, POLR2G, POLR2H, POLR2K, POLR2L]
R-HSA:190236	Signaling by FGFR	REACTOME_Pathways_27.02.2019	0.0343144	0.0471628	1.4534e-115	3.29437e-114	[-1]	Group65	16.092	14	[GTF2F2, HNRNPH1, NCBP1, NCBP2, POLR2A, POLR2C, POLR2E, POLR2F, POLR2G, POLR2H, POLR2K, POLR2L, PPP2R1A, UBC]
R-HSA:191859	snRNP Assembly	REACTOME_Pathways_27.02.2019	1.22548e-19	6.89478e-19	1.4534e-115	3.29437e-114	[-1]	Group65	58.4906	31	[CLNS1A, DDX20, GEMIN4, GEMIN5, GEMIN6, GEMIN7, NCBP1, NCBP2, NDC1, NUP133, NUP153, NUP155, NUP160, NUP205, NUP214, NUP43, NUP85, NUP88, NUP98, PHAX, PRMT5, RAE1, SEC13, SEH1L, SNRPD1, SNRPD2, SNRPD3, SNRPF, SNUPN, TPR, WDR77]
R-HSA:194441	Metabolism of non-coding RNA	REACTOME_Pathways_27.02.2019	1.22548e-19	6.89478e-19	1.4534e-115	3.29437e-114	[-1]	Group65	58.4906	31	[CLNS1A, DDX20, GEMIN4, GEMIN5, GEMIN6, GEMIN7, NCBP1, NCBP2, NDC1, NUP133, NUP153, NUP155, NUP160, NUP205, NUP214, NUP43, NUP85, NUP88, NUP98, PHAX, PRMT5, RAE1, SEC13, SEH1L, SNRPD1, SNRPD2, SNRPD3, SNRPF, SNUPN, TPR, WDR77]
R-HSA:203927	MicroRNA (miRNA) biogenesis	REACTOME_Pathways_27.02.2019	1.84185e-05	3.56525e-05	1.4534e-115	3.29437e-114	[-1]	Group65	41.6667	10	[DICER1, POLR2A, POLR2C, POLR2E, POLR2F, POLR2G, POLR2H, POLR2K, POLR2L, XPO5]
R-HSA:211000	Gene Silencing by RNA	REACTOME_Pathways_27.02.2019	7.00737e-08	1.68738e-07	1.4534e-115	3.29437e-114	[-1]	Group65	24.2647	33	[DICER1, H2AFX, H2AFZ, HIST1H2BC, HIST1H2BJ, HIST1H2BL, HIST2H2AC, HIST2H2BE, HIST2H3D, NDC1, NUP133, NUP153, NUP155, NUP160, NUP205, NUP214, NUP43, NUP85, NUP88, NUP98, POLR2A, POLR2C, POLR2E, POLR2F, POLR2G, POLR2H, POLR2K, POLR2L, RAE1, SEC13, SEH1L, TPR, XPO5]
R-HSA:2299718	Condensation of Prophase Chromosomes	REACTOME_Pathways_27.02.2019	0.00291376	0.00470264	1.4534e-115	3.29437e-114	[-1]	Group65	20.2703	15	[H2AFX, H2AFZ, HIST1H2BC, HIST1H2BJ, HIST1H2BL, HIST2H2AC, HIST2H2BE, HIST2H3D, NCAPD3, NCAPG2, NCAPH2, PLK1, SET, SMC2, SMC4]
R-HSA:2980766	Nuclear Envelope Breakdown	REACTOME_Pathways_27.02.2019	1.32947e-06	2.85837e-06	1.4534e-115	3.29437e-114	[-1]	Group65	32.6923	17	[BANF1, NDC1, NUP133, NUP153, NUP155, NUP160, NUP205, NUP214, NUP43, NUP85, NUP88, NUP98, PLK1, RAE1, SEC13, SEH1L, TPR]
[truncated: 846 more rows]

## Sheet: Squamous cell carcinoma
GOID	GOTerm	Ontology Source	Term PValue	Term PValue Corrected with Benjamini-Hochberg	Group PValue	Group PValue Corrected with Benjamini-Hochberg	GOLevels	GOGroups	% Associated Genes	Nr. Genes	Associated Genes Found
[truncated: 1,009 more rows]
