# Supplementary material for: CSNK1A1, KDM2A, and LTB4R2 Are New Druggable Vulnerabilities in Lung Cancer
Source: Cancers (Basel). 2021 Jul 12;13(14):3477. doi: 10.3390/cancers13143477 (PMC8305418; doi:10.3390/cancers13143477)
Supplement: Supplementary file 1 [file cancers-13-03477-s001.zip › Supplementary files/Supplementary Table 2.xlsx]

## Sheet: Squamous cell carcinoma
Drug	Targets	Biological process	Status	# targets
Gemcitabine	CMPK1, POLD1, RRM1, RRM2	DNA synthesis	1	4
irinotecan	TOP1	DNA synthesis	1	1								# drugs
BORTEZOMIB	ADRM1, PSMA1, PSMA2, PSMA3, PSMA4, PSMA5, PSMA6, PSMA7, PSMB1, PSMB2, PSMB3, PSMB4, PSMB5, PSMB6, PSMB7, PSMC1, PSMC2, PSMC3, PSMC4, PSMC5, PSMC6, PSMD11, PSMD12, PSMD13, PSMD2, PSMD3, PSMD4, PSMD6, PSMD7, PSMD8, PSMD14, PSME1, SEM1	Proteosome	2	33				1	Approved for lung cancer (any histotype)			2
VENETOCLAX	BCL2L1	Apoptosis	2	1				2	Aproved for other cancer condition			10
lenalidomide	DDB1	Ubiquitylation	2	1				3	In clinical trials for cancer conditions			20
Moxetumomab Pasudotox, Denileukin diftitox	EEF2	Translation	2	1				4	Approved or in clinical trials for non-cancer conditions			7
vorinostat	HDAC3	chromatin regulation	2	1				5	Pre-clinical data on target			1
PI3K inhibitors	PIK3C3, PI4KA, PIK3R4	PI3K signaling	2	3
cladribine	POLE2	DNA synthesis	2	1
OMACETAXINE MEPESUCCINATE	RPL3	Protein synthesis	2	1
epirubicin	TOP2A	DNA synthesis	2	1
docetaxel, paclitaxel, vinca alcaloids	TUBB, TUBA1B, TUBA1C, TPX2, TUBB8	Microtubule polymerization	2	5
chiaruanib	AURKB	cell cycle	3	1
YM-155, survivin vaccine	BIRC5 (survivin)	Anti-apoptosis	3	1
OTX-015	BRD4	Chromatin regulation	3	1
BMS-863233	CDC7	cell cycle	3	1
alvocidib	CDK9	cell cycle	3	1
GSK-923295	CENPE	cell cycle	3	1
CHK inhibitors	CHEK1	cell cycle	3	1
lonafamib	FNTB, FNTA	prenylation	3	2
filanesib	KIF11	cell cycle	3	1
mTOR inhibitors	MLST8, MTOR, RICTOR, RPTOR	mTOR signaling	3	4
pevonedistat	NAE1, UBA3	NEDDylation	3	2
ATN-224	NDUFAB1, NDUFB6, NDUFA2, NDUFAF3	Mitochondrial respiratory chain	3	4
TOSEDOSTAT	NPEPPS	peptidase	3	1
celecoxib	PDPK1	mTOR signaling	3	1
volasertib	PLK1	cell cycle	3	1
CFI-400945	PLK4	cell cycle	3	1
GSK3368715	PRMT1	chromatin regulation	3	1
JNJ-64619178	PRMT5	chromatin regulation	3	1
AZD-1775	WEE1	cell cycle	3	1
selinexor	XPO1	Nuclear export	3	1
Istaroxime	ATP2A2	Membrane pump	4	1
TILUDRONIC ACID	ATP6V1A	Membrane pump	4	1
Dronedarone	CACNB3	Calcium Channel	4	1
ZOLEDRONIC ACID	FDPS, GGPS1	prenylation	4	2
Semapimod	HSP90B1	Protein folding	4	1
CYCLOSPORINE	PPIA	protein folding	4	1
HEXACHLOROPHENE	SDHD	Mitochondrial respiratory chain	4	1
LY-255283	LTB4R2	wound-healing	5	1
				90

## Sheet: Small cell lung cancer
Drug	Targets	Biological process	Status	# targets
Gemcitabine	CMPK1, POLD1, RRM1, RRM2	DNA synthesis	1	4
Bortezomib	ADRM1, PSMA1, PSMA2, PSMA3, PSMA4, PSMA5, PSMA6, PSMA7, PSMB1, PSMB2, PSMB3, PSMB4, PSMB5, PSMB6, PSMB7, PSMC1, SMC2, PSMC3, PSMC4, PSMC5, PSMC6, PSMD11, PSMD12, PSMD13, PSMD14, PSMD2, PSMD3, PSMD4, PSMD6, PSMD7, PSMD8, PSME1, SEM1	Proteasome	2	33
VENETOCLAX	BCL2L1, MCL1	Apoptosis	2	2
lenalidomide	DDB1, RBX1	Ubiquitylation	2	2									# drugs
Moxetumomab Pasudotox, Denileukin diftitox	EEF2	Translation	2	1				1	Approved for lung cancer (any histotype)				1
vorinostat	HDAC3	chromatin regulation	2	1				2	Aproved for other cancer condition				11
PI3K inhibitors	PIK3C3, PI4KA	PI3K signaling	2	2				3	In clinical trials for cancer conditions				21
cladribine	POLE2	DNA synthesis	2	1				4	Approved or in clinical trials for non-cancer conditions				7
MERCAPTOPURINE HYDRATE	PPAT	Nucleotides synthesis	2	1				5	Pre-clinical data on target				1
OMACETAXINE MEPESUCCINATE	RPL3	Protein synthesis	2	1
epirubicin	TOP2A	DNA synthesis	2	1
docetaxel, paclitaxel, vinca alcaloids	TPX2, TUBA1C, TUBB, TUBB8	Microtubule polymerization	2	4
chiaruanib	AURKB	cell cycle	3	1
YM-155, survivin vaccine	BIRC5 (survivin)	Anti-apoptosis	3	1
OTX-015	BRD4	Chromatin regulation	3	1
Palbociclib	CCND1	cell cycle	3	1
BMS-863233	CDC7	cell cycle	3	1
alvocidib	CDK9	cell cycle	3	1
GSK-923295	CENPE	cell cycle	3	1
CHK inhibitors	CHEK1	cell cycle	3	1
lonafamib	FNTB, FNTA	prenylation	3	2
filanesib	KIF11	cell cycle	3	1
mTOR inhibitors	MLST8, MTOR, RPTOR	mTOR signaling	3	3
ATN-224	NDUFAB1, NDUFB6, NDUFA2	Mitochondrial respiratory chain	3	3
celecoxib	PDPK1	mTOR signaling	3	1
volasertib	PLK1	cell cycle	3	1
CFI-400945	PLK4	cell cycle	3	1
GSK3368715	PRMT1	chromatin regulation	3	1
JNJ-64619178	PRMT5	chromatin regulation	3	1
defactinib	PTK2	signaling	3	1
pevonedistat	UBA3	NEDDylation	3	1
AZD-1775	WEE1	cell cycle	3	1
selinexor	XPO1	Nuclear export	3	1
Istaroxime	ATP2A2	Membrane pump	4	1
TILUDRONIC ACID	ATP6V1A	Membrane pump	4	1
Dronedarone	CACNB3	Calcium Channel	4	1
ZOLEDRONIC ACID	FDPS, GGPS1	prenylation	4	2
SUVOREXANT	HCRTR1	signaling	4	1
CYCLOSPORINE	PPIA	protein folding	4	1
HEXACHLOROPHENE	SDHD	Mitochondrial respiratory chain	4	1
daminozide	KDM2A	chromatin regulation	5	1
				88

## Sheet: Lung adenocarcinoma
Drug	Targets	Biological process	Status	# targets
Gemcitabine	RRM2, RRM1, POLD1, CMPK1	DNA synthesis	1	4								# drugs
irinotecan	TOP1	DNA synthesis	1	1			1	Approved for lung cancer (any histotype)				2
OMACETAXINE MEPESUCCINATE	RPL3	Protein synthesis	2	1			2	Aproved for other cancer condition				9
Bortezomib	PSMA3, PSMA6, PSMD6, PSMB5, PSMB3, PSMD3, PSMB6, PSMD4, PSMB2, PSMA4, PSMD14, PSMD12, PSMB1, PSMD7, PSMC3, PSMD8, PSMC5, PSMD11, PSMB7, PSMD13, PSMD2, PSMC2, PSMA5, PSMC1, PSMC6, PSMB4, PSMA1, PSMA2, PSMC4, SEM1, PSMA7	Proteasome	2	31			3	In clinical trials for cancer conditions				22
cladribine	POLE2	DNA synthesis	2	1			4	Approved or in clinical trials for non-cancer conditions				11
docetaxel, paclitaxel, vinca alcaloids	TUBB, TUBA1C, TPX1, TPX2, TUBB8	Microtubule polymerization	2	5			5	Pre-clinical data on target				2
PI3K inhibitors	PIK3C3, PI4KA, PIK3R4	PI3K signaling	2	3
epirubicin	TOP2A	DNA synthesis	2	1
vorinostat	HDAC3	chromatin regulation	2	1
lenalidomide	RBX1, DDB1	Ubiquitylation	2	2
Moxetumomab Pasudotox, Denileukin diftitox	EEF2	Translation	2	1
AZD-1775	WEE1	cell cycle	3	1
filanesib	KIF11	cell cycle	3	1
celecoxib	PDPK1	mTOR signaling	3	1
pevonedistat	NAE1, UBA3	NEDDylation	3	2
CHK inhibitors	CHEK1	cell cycle	3	1
CFI-400945	PLK4	cell cycle	3	1
chiaruanib	AURKB	cell cycle	3	1
volasertib	PLK1	cell cycle	3	1
JNJ-64619178	PRMT5	chromatin regulation	3	1
selinexor	XPO1	Nuclear export	3	1
BMS-863233	CDC7	cell cycle	3	1
GSK3368715	PRMT1	chromatin regulation	3	1
ATN-224	NDUFAB1, NDUFB2, NDUFA6, NDUFB6, NDUFA8, NDUFB8, NDUFS3, NDUFB10, NDUFS2, NDUFAF3, NDUFB7, NDUFB3	Mitochondrial respiratory chain	3	12
mTOR inhibitors	MTOR, RPTOR, MLST8	mTOR signaling	3	3
OTX-015	BRD4	Chromatin regulation	3	1
YM-155, survivin vaccine	BIRC5 (survivin)	Anti-apoptosis	3	1
lonafamib	FNTB, FNTA	prenylation	3	2
GSK-923295	CENPE	cell cycle	3	1
alvocidib	CDK9	cell cycle	3	1
defactinib	PTK2	signaling	3	1
Palbociclib	CCND1	cell cycle	3	1
TOSEDOSTAT	METAP1, NPEPPS	peptidase	3	2
Semapimod	HSP90B1	Protein folding	4	1
DUTASTERIDE	SRD5A3	androgens synthesis	4	1
ZOLEDRONIC ACID	GGPS1, FDPS	prenylation	4	2
Dronedarone	CACNB3	Calcium Channel	4	1
TILUDRONIC ACID	ATP6V1A	Membrane pump	4	1
HEXACHLOROPHENE	SDHD	Mitochondrial respiratory chain	4	1
RIBAVIRIN	IMPDH2	Nucleotides synthesis	4	1
CYCLOSPORINE	PPIA	protein folding	4	1
SUVOREXANT	HCRTR1	signaling	4	1
Istaroxime	ATP2A2	Membrane pump	4	1
ROXADUSTAT	EGLN2	oxygen homeostasis	4	1
daminozide	KDM2A	chromatin regulation	5	1
D4476	CSNK1A1	WNT signaling	5	1
				103
