# Supplementary material for: CSNK1A1, KDM2A, and LTB4R2 Are New Druggable Vulnerabilities in Lung Cancer
Source: Cancers (Basel). 2021 Jul 12;13(14):3477. doi: 10.3390/cancers13143477 (PMC8305418; doi:10.3390/cancers13143477)
Supplement: Supplementary file 1 [file cancers-13-03477-s001.zip › Supplementary files/Supplementary Table 3.xls]

## Sheet: RNA
Sample	Age at diagnosis	Sex	Smoking: never, current, former	Main pattern	Vascular invasion	grading	Main axis	Linmphnodes (N)	ALK IHC	ROS IHC	PDL IHC	EGFR	KRAS
AD20	74.7947	F	never	acinar	NO	3	5cm	1	0	3+	1+	MUT	WT
AD21	78.0417	M	current	acinar	YES	2	4cm	0	0	NE	NE	WT	WT
AD22	82.5489	M	former	cribriform	NO	3	5cm	2	0	NE	NE	WT	WT
AD23	76.5127	M	former	acinar and micropapillary	NO	2	6cm	0	0	NE	NE	WT	WT
AD24	68.0418	F	former	sarcomatoid	NO	3	3.8cm	0	0	0	3+	WT	MUT
AD26	60.2471	F	current	solid	YES	3	2.5cm	0	0	0	3+	WT	MUT
AD28	68.7104	M	current	acinar	NO	2	0.9cm	-	0	0	1+	WT	MUT
AD29	84.4805	F	never	acinar	NO	2	5.5cm	0	0	0	1+	WT	MUT
AD30	85.5134	F	-	acinar lepidic	NO	2	3cm	-	0	1+	1+	MUT	WT
															NE: Not evaluated
