# Supplementary material for: CSNK1A1, KDM2A, and LTB4R2 Are New Druggable Vulnerabilities in Lung Cancer
Source: Cancers (Basel). 2021 Jul 12;13(14):3477. doi: 10.3390/cancers13143477 (PMC8305418; doi:10.3390/cancers13143477)
Supplement: Supplementary file 1 [file cancers-13-03477-s001.zip › Supplementary files/Supplementary Table 4.xlsx]

## Sheet: CRISPR
Target	Library	sgRNA target sequence	Primer Forward ALTR detection (5’-3’)	Primer Reverse ALTR detection (5’-3’)
CSNK1A1	GeCKOv2	TGTACTTATGTTAGCTGACC	TCCAGGTTTTGTCTTATTCCCA	TCTGTGATCTGAAGCCAAGGA
	Brunello	CCGGGTTCTTACCGTATGTG	ATCAGAAGTGCCGCCGTAAA	ACTGGGCCTCTTGTTCCAAT
KDM2A	GeCKOv2	TATGGCAGGGAGTCGTCGCA	GCGAAATAGCCCTGTTTAACAA	TGGTGTGGCTAAACTCGAGG
	Brunello	CAACATTGAAGATCGGACAC	CCCTCTGTTCCCCTTCTCCT	ACCTCACAGAATTGGAGTCCC
LTB4R2	GeCKOv2	CCACGCAGTCAACCTTCTGC	GAACGAGACACTGCTGAGCT	CCACCACTTTCAGCTGAGGG
	Brunello	GAGCAGCAGCACCGCGCCGT	GAGACACTGCTGAGCTGGAA	CTCCAGCGGTGAAGACGTAG
ATP2A2	GeCKOv2	CTCAATCACAAGTTCCAGCA	AAGGCCTCTGACCGTTCTTG	TCTAAGACCATGCCACACTCTG

## Sheet: RT-qPCR
Target	Primer forward (5'-3')	Primer reverse (5'-3')
CSNK1A1	AAGATGTCCACGCCTGTTGA	AGCCCACGACAATAGTTTAAGT
KDM2A	TCTGTGGAGAGGTGGATCAGA	GCAACCCCTCTCCGTCCA
LTB4R2	GAACGAGACACTGCTGAGCT	CCAAGCTCCACACCACGAA
GUSB	TTGAGCAAGACTGATACCACCTG	TCTGGTCTGCCGTGAACAGT
Cyclophilin A	GACCCAACACAAATGGTTCC	TTTCACTTTGCCAAACACCA
